# Supplementary material for: Biogeochemical Typing of Paddy Field by a Data-Driven Approach Revealing Sub-Systems within a Complex Environment - A Pipeline to Filtrate, Organize and Frame Massive Dataset from Multi-Omics Analyses
Source: PubMed Central journal article supplement (PMC4203823; doi:10.1371/journal.pone.0110723), 2014-10-20
Supplement: pone.0110723.s006.pdf [file pone.0110723.s006.pdf]

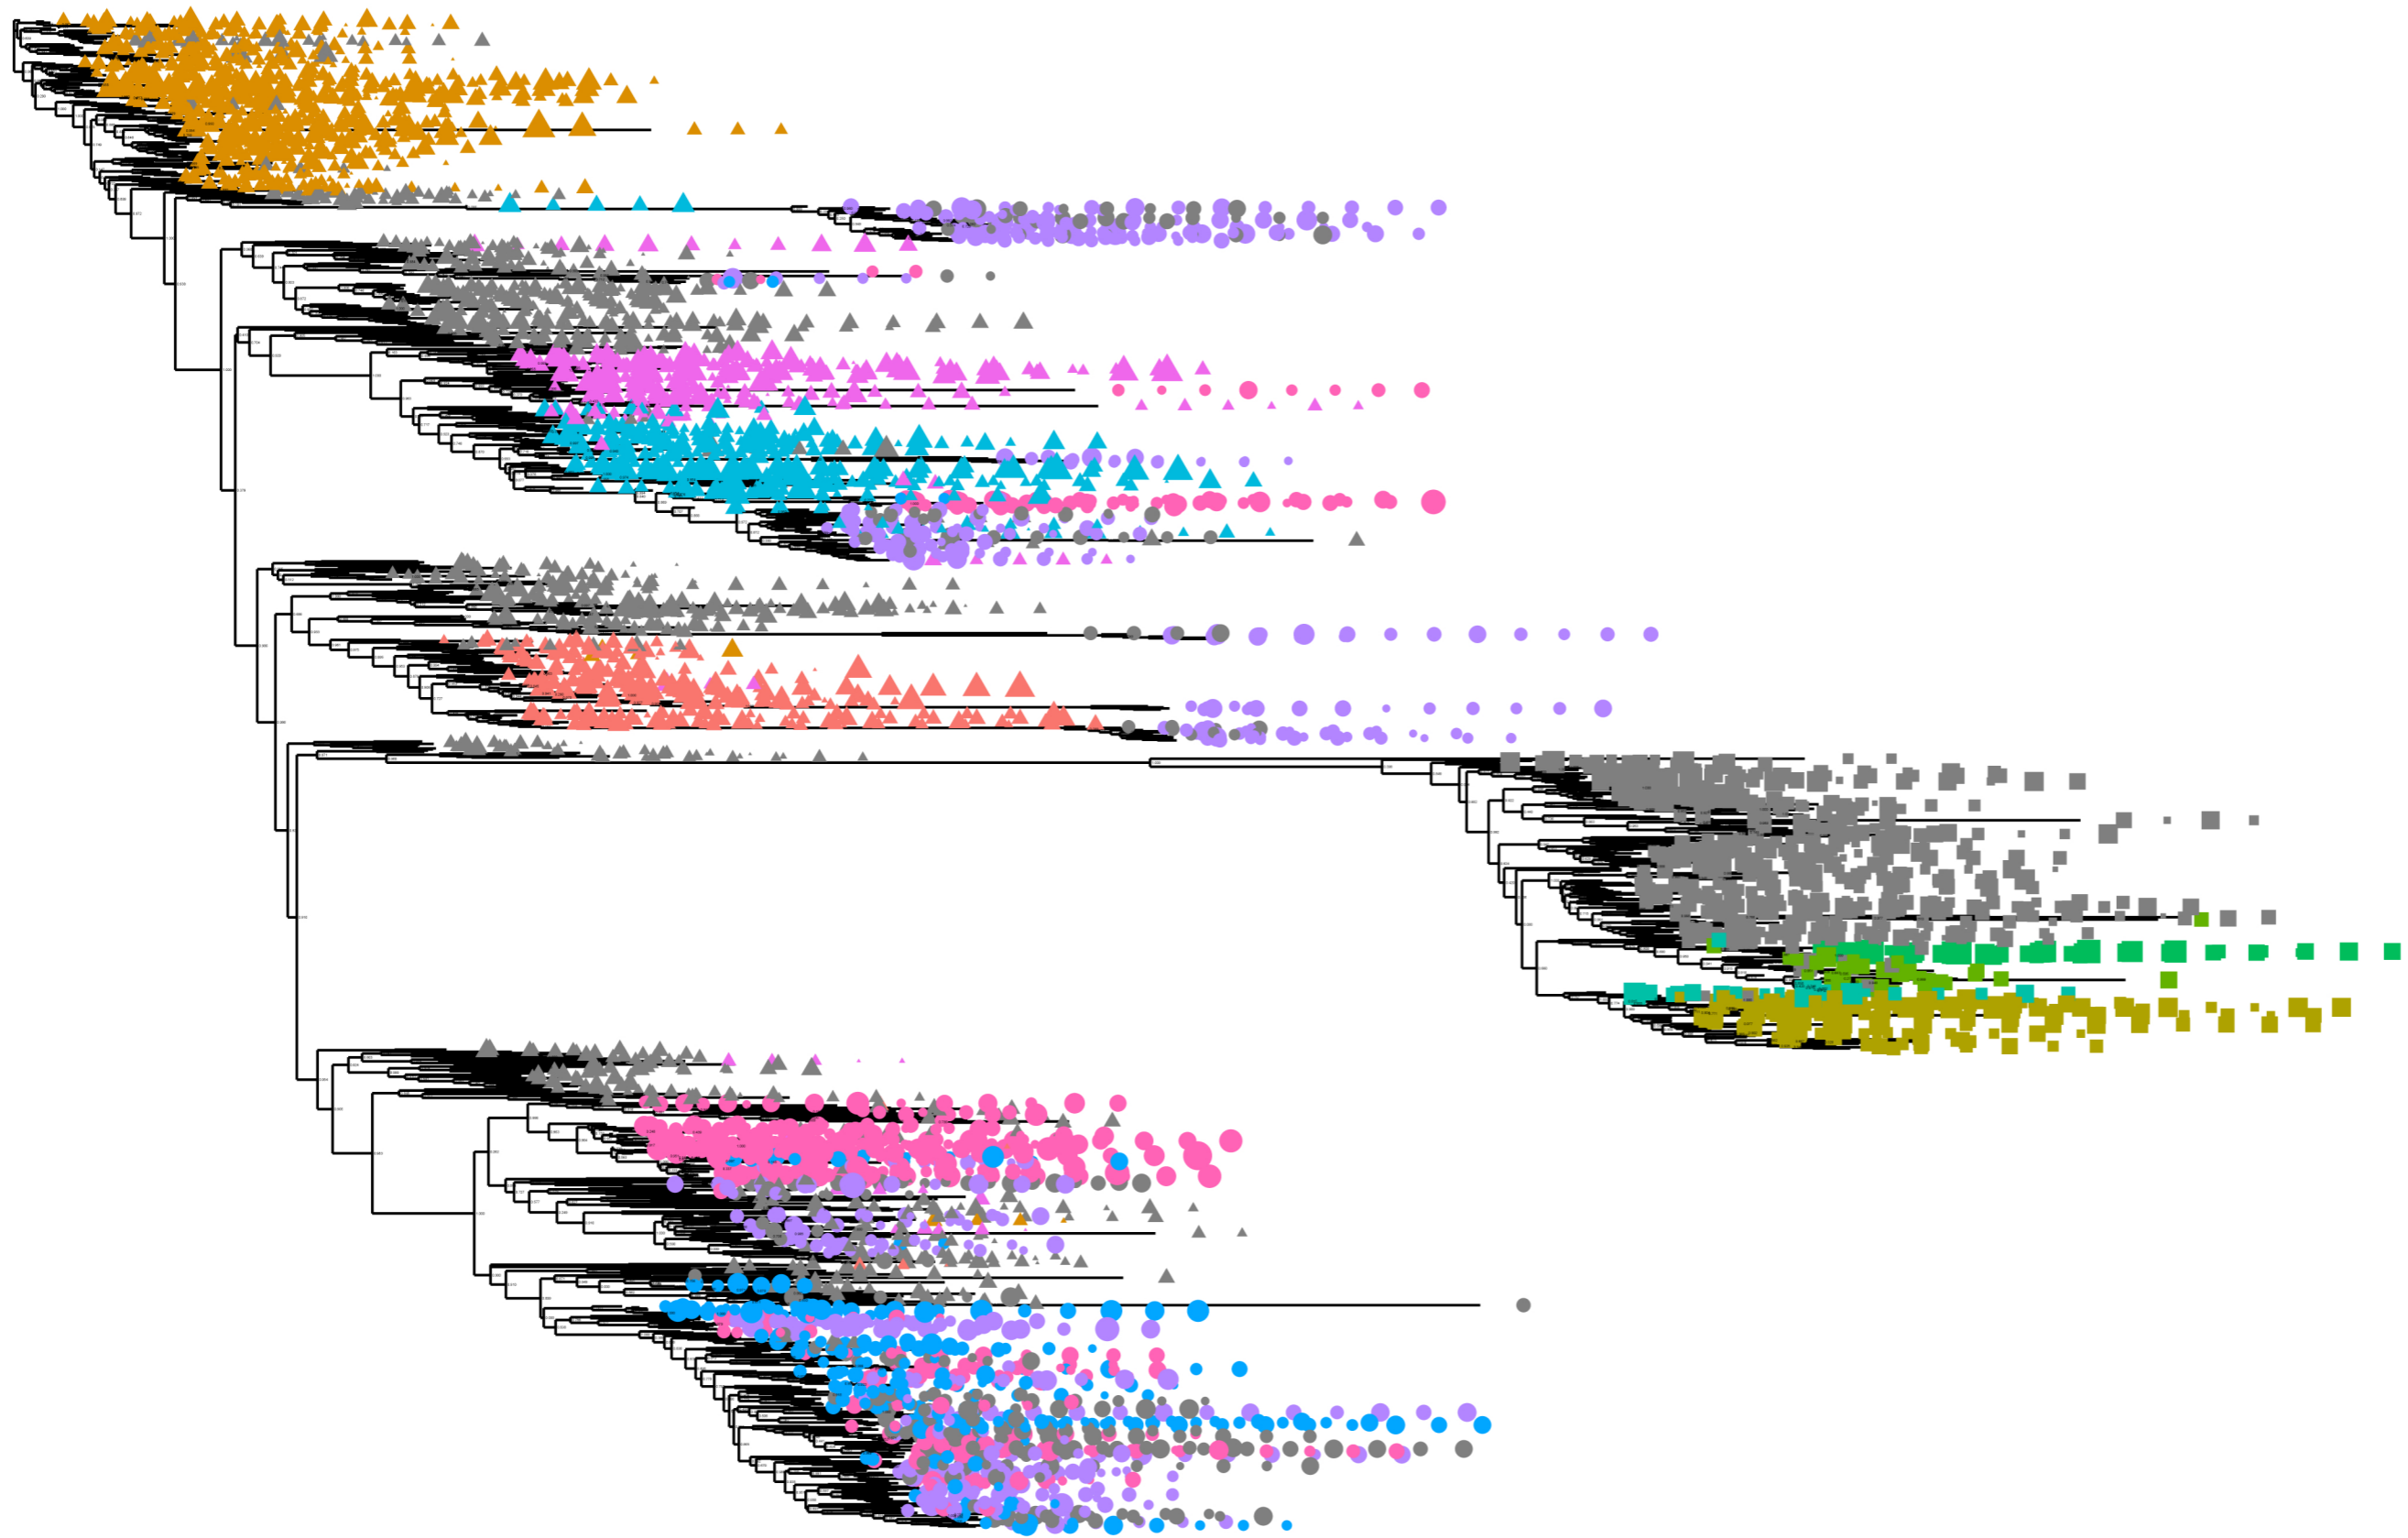

**Abundance**

- 6.4e-05
- 1.6e-03
- 4.0e-02

**Rank2**

- Archaea domain
- ▲ Bacteria domain
- k\_Eukaryota

**Rank4**

- Actinobacteria class
- Betaproteobacteria class
- c\_\_Chlorophyta
- c\_\_Gastrotricha
- c\_\_Rotifera
- c\_\_Streptophyta
- Flavobacteria class
- Methanobacteria class
- Methanomicrobia class
- Sphingobacteria class
- Thermoprotei class
