# Supplementary material for: Biogeochemical Typing of Paddy Field by a Data-Driven Approach Revealing Sub-Systems within a Complex Environment - A Pipeline to Filtrate, Organize and Frame Massive Dataset from Multi-Omics Analyses
Source: PubMed Central journal article supplement (PMC4203823; doi:10.1371/journal.pone.0110723), 2014-10-20
Supplement: pone.0110723.s012.pdf [file pone.0110723.s012.pdf]

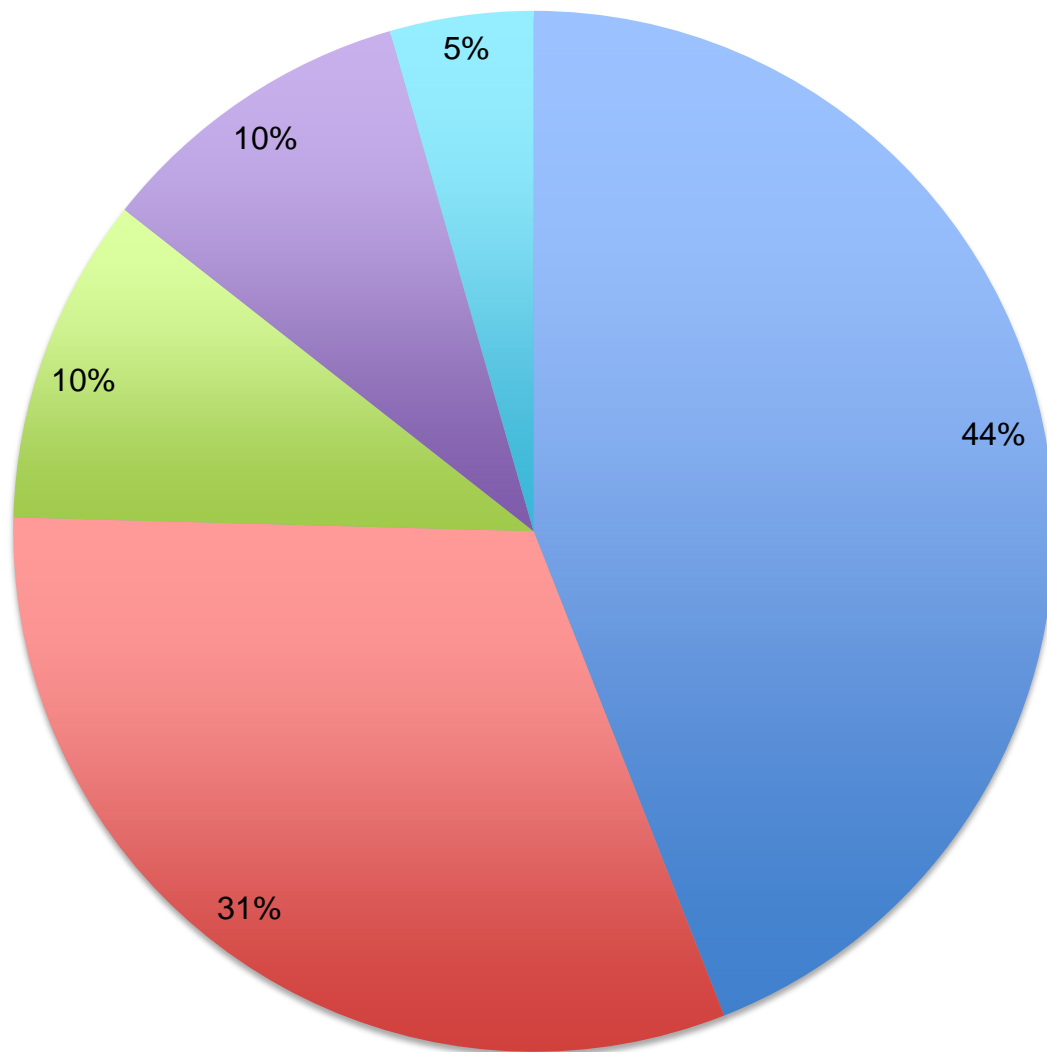

- Archaea; Euryarchaeota phylum; Methanomicrobia class
- Archaea; Euryarchaeota phylum; Thermoplasmata class; Thermoplasmatales order
- Archaea; Euryarchaeota phylum; Halobacteria class; Halobacteriales order; Halobacteriaceae family
- Archaea; Euryarchaeota phylum; Methanobacteria class; Methanobacteriales order; Methanobacteriaceae family
- Archaea; Others
