# Supplementary material for: Biogeochemical Typing of Paddy Field by a Data-Driven Approach Revealing Sub-Systems within a Complex Environment - A Pipeline to Filtrate, Organize and Frame Massive Dataset from Multi-Omics Analyses
Source: PubMed Central journal article supplement (PMC4203823; doi:10.1371/journal.pone.0110723), 2014-10-20
Supplement: pone.0110723.s015.pdf [file pone.0110723.s015.pdf]

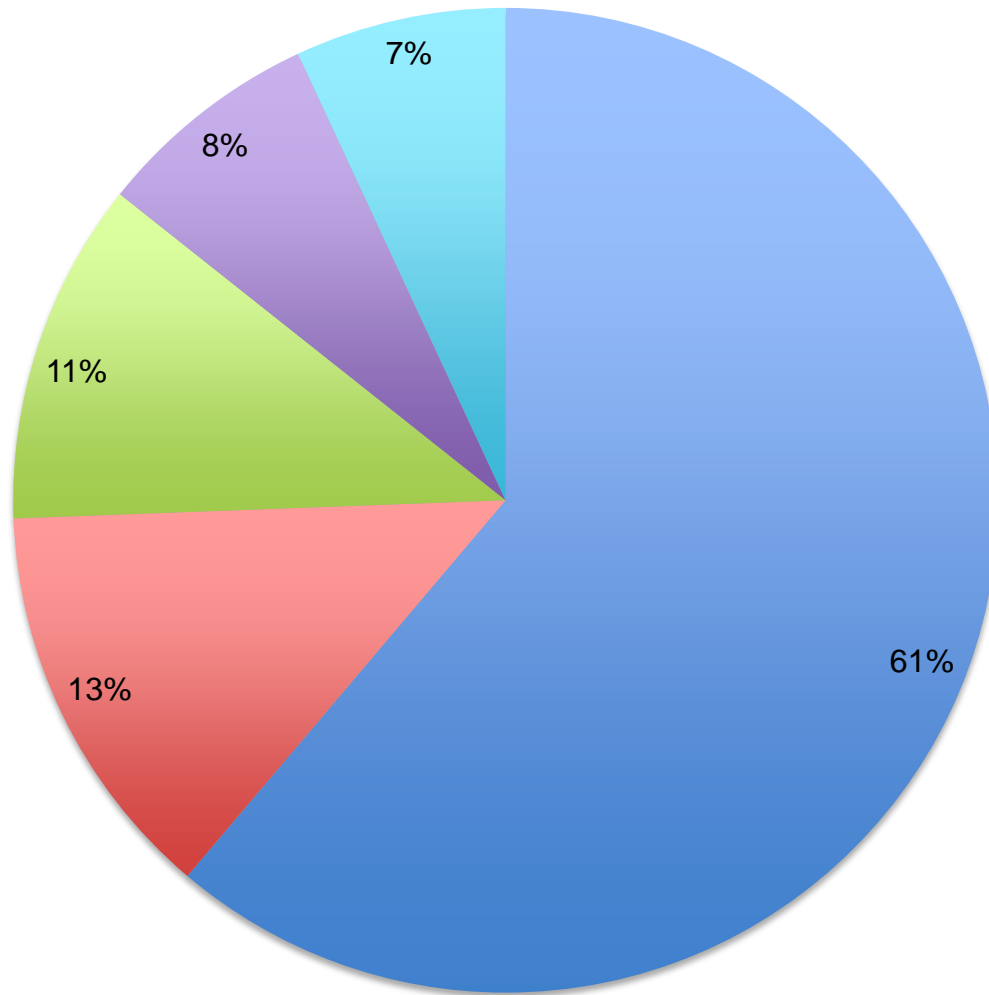

■ Archaea; Euryarchaeota phylum;  
Methanomicrobia class

■ Archaea; Euryarchaeota phylum;  
Thermoplasmata class;  
Thermoplasmatales order

■ Archaea; Euryarchaeota phylum;  
Methanobacteria class;  
Methanobacteriales order;  
Methanobacteriaceae family

■ Archaea; Crenarchaeota phylum;  
Thermoprotei class

■ Archaea; Euryarchaeota phylum; others
