# Supplementary material for: Biogeochemical Typing of Paddy Field by a Data-Driven Approach Revealing Sub-Systems within a Complex Environment - A Pipeline to Filtrate, Organize and Frame Massive Dataset from Multi-Omics Analyses
Source: PubMed Central journal article supplement (PMC4203823; doi:10.1371/journal.pone.0110723), 2014-10-20
Supplement: pone.0110723.s016.pdf [file pone.0110723.s016.pdf]

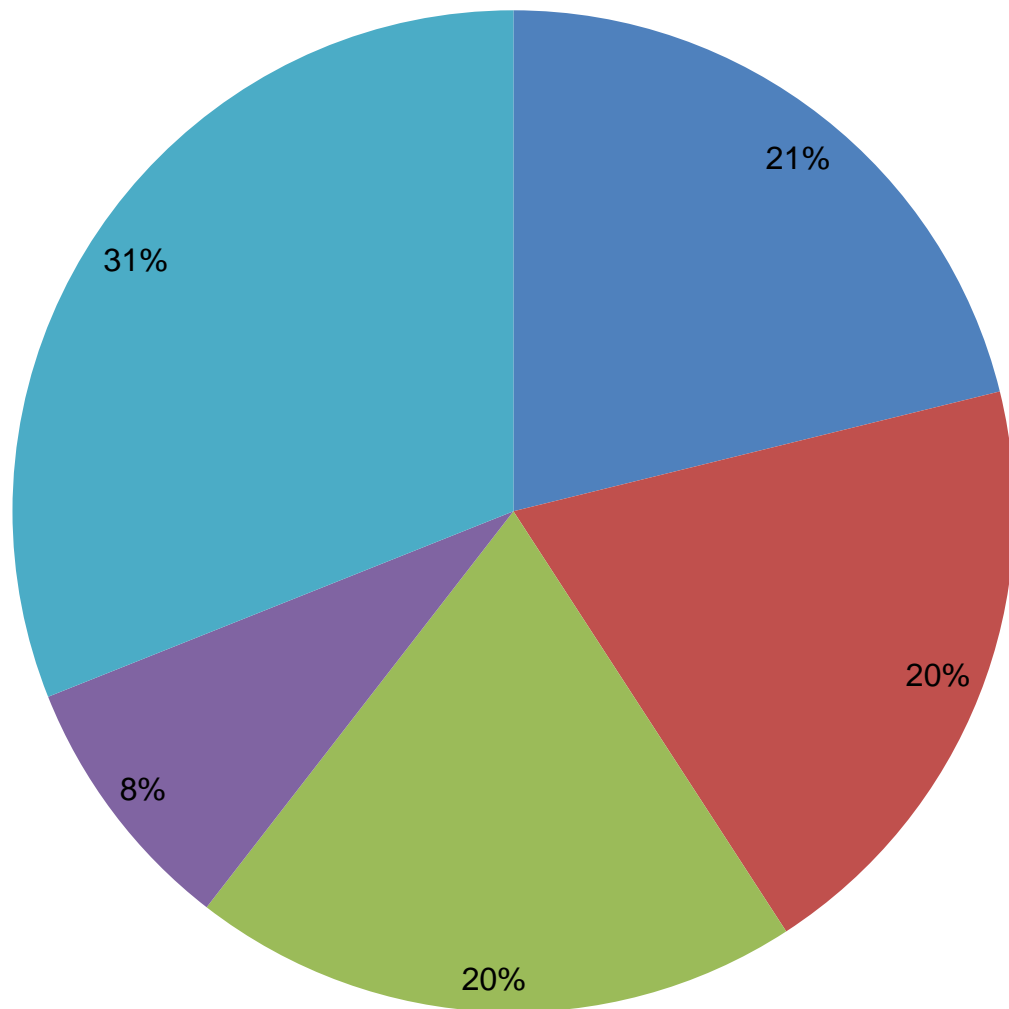

- Bacteria; Bacteroidetes phylum; Flavobacteria class; Flavobacteriales order; Flavobacteriaceae family
- Bacteria; Proteobacteria phylum; Betaproteobacteria class
- Bacteria; Cyanobacteria/Chloroplast phylum; Chloroplast class; Chloroplast family
- Bacteria; Actinobacteria phylum; Actinobacteria class
- Bacteria; Others
