# Supplementary material for: Biogeochemical Typing of Paddy Field by a Data-Driven Approach Revealing Sub-Systems within a Complex Environment - A Pipeline to Filtrate, Organize and Frame Massive Dataset from Multi-Omics Analyses
Source: PubMed Central journal article supplement (PMC4203823; doi:10.1371/journal.pone.0110723), 2014-10-20
Supplement: pone.0110723.s017.pdf [file pone.0110723.s017.pdf]

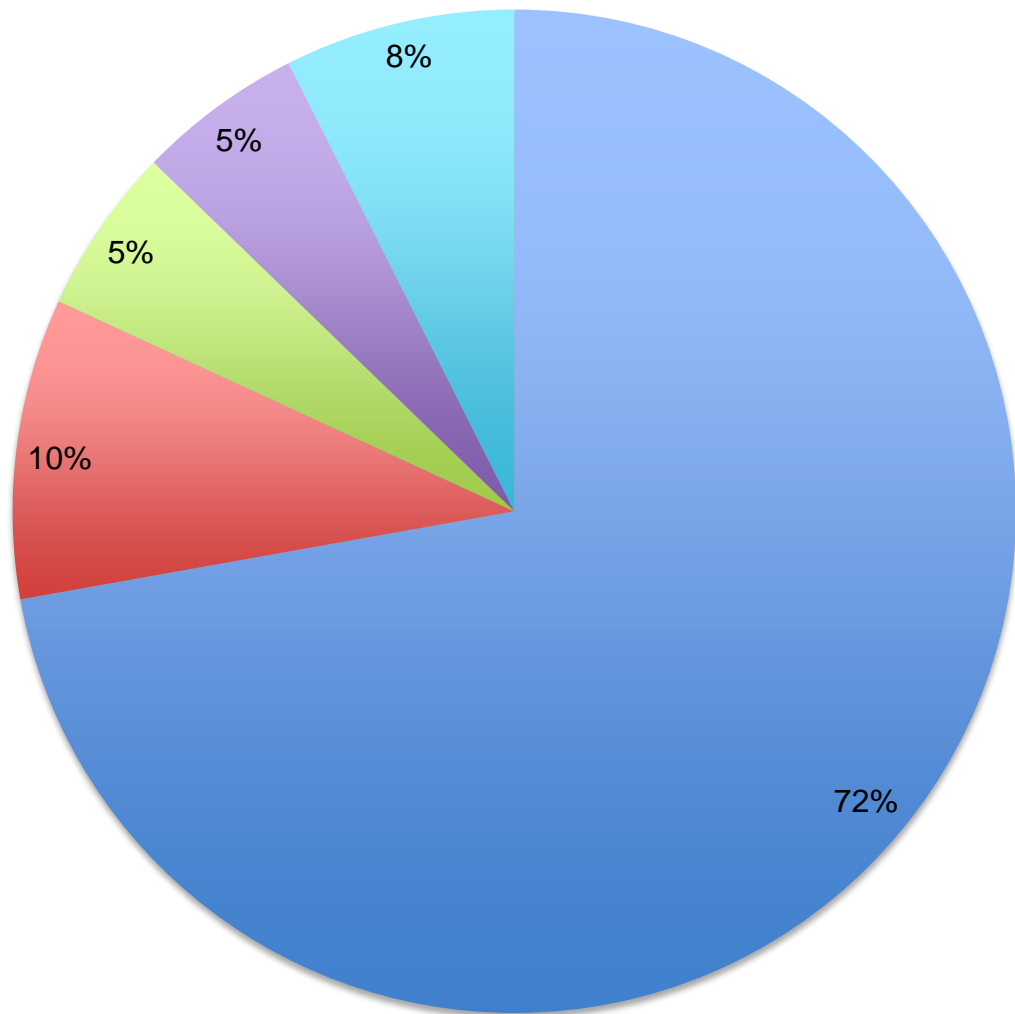

■ Bacteria; Actinobacteria phylum; Actinobacteria class

■ Bacteria; Firmicutes phylum; Bacilli class; Bacillales order

■ Root; Bacteria domain; Bacteroidetes phylum; Flavobacteria class; Flavobacteriales order; Flavobacteriaceae family

■ Root; Bacteria domain; Proteobacteria phylum; Betaproteobacteria class

■ Bacteria; Others
