# Supplementary material for: Biogeochemical Typing of Paddy Field by a Data-Driven Approach Revealing Sub-Systems within a Complex Environment - A Pipeline to Filtrate, Organize and Frame Massive Dataset from Multi-Omics Analyses
Source: PubMed Central journal article supplement (PMC4203823; doi:10.1371/journal.pone.0110723), 2014-10-20
Supplement: pone.0110723.s020.pdf [file pone.0110723.s020.pdf]

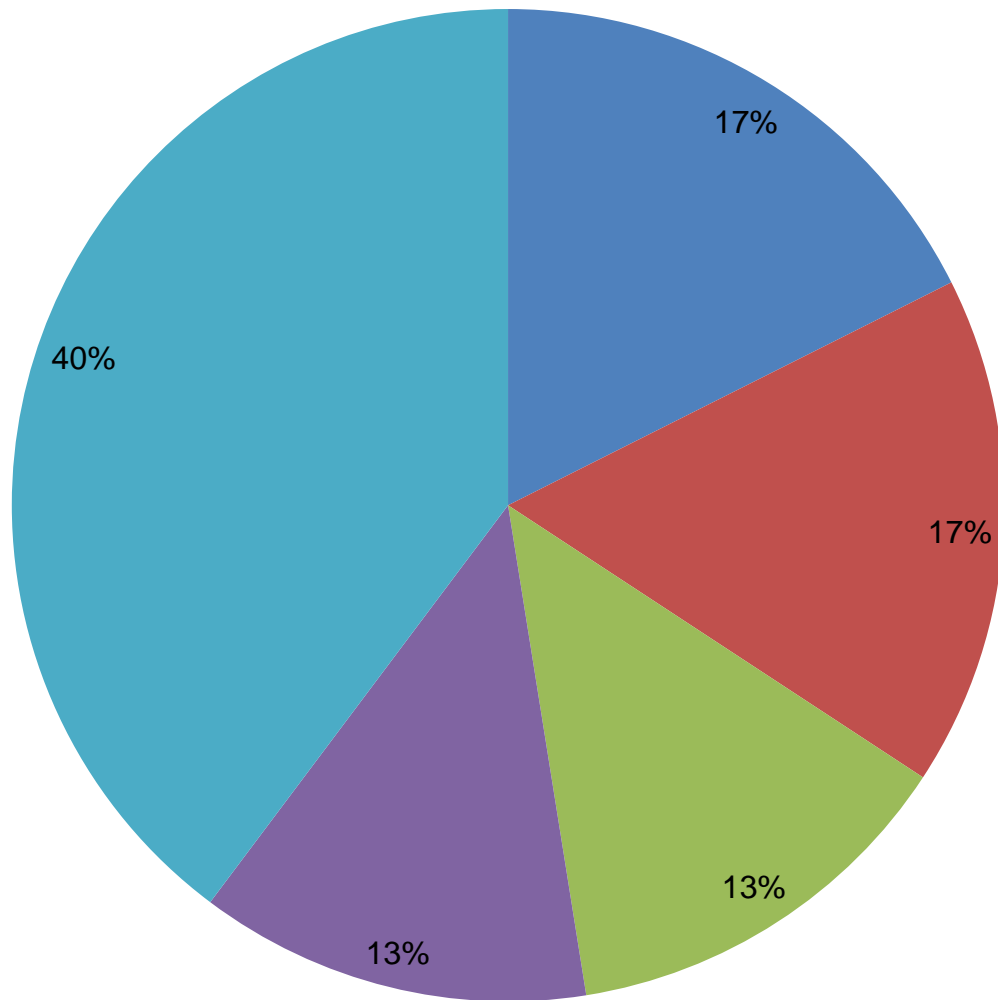

- Eukaryota; p\_\_Metazoa; c\_\_Nematoda
- Eukaryota; p\_\_Metazoa; c\_\_Gastrotricha
- Eukaryota
- Eukaryota; p\_\_Metazoa; c\_\_Rotifera; o\_\_Monogononta
- Eukaryota; Others
