# Supplementary material for: Biogeochemical Typing of Paddy Field by a Data-Driven Approach Revealing Sub-Systems within a Complex Environment - A Pipeline to Filtrate, Organize and Frame Massive Dataset from Multi-Omics Analyses
Source: PubMed Central journal article supplement (PMC4203823; doi:10.1371/journal.pone.0110723), 2014-10-20
Supplement: pone.0110723.s023.pdf [file pone.0110723.s023.pdf]

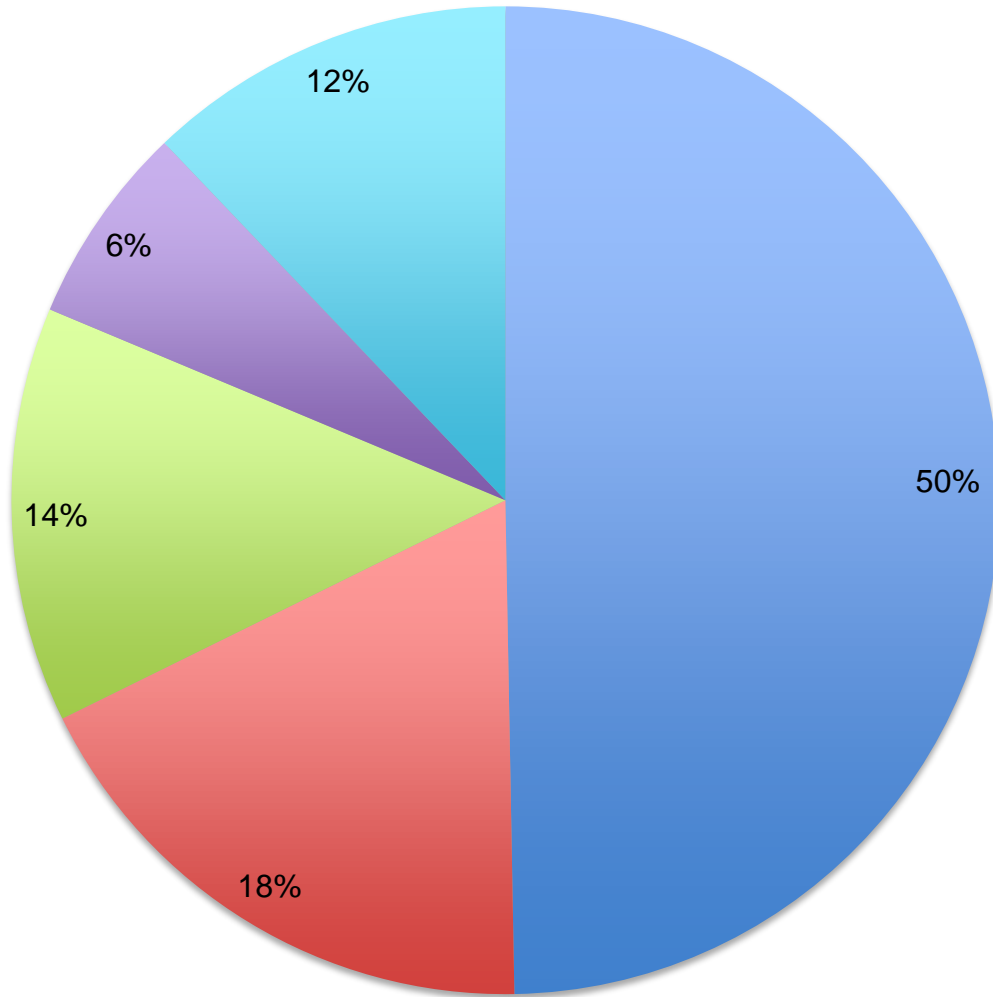

■ Eukaryota; p\_\_Alveolata; c\_\_Ciliophora

■ Eukaryota; p\_\_Metazoa;  
c\_\_Gastrotricha

■ Eukaryota

■ Eukaryota; p\_\_Euglenozoa;  
c\_\_Euglenida; o\_\_Euglenales

■ Eukaryota; Others
