# Supplementary material for: Biogeochemical Typing of Paddy Field by a Data-Driven Approach Revealing Sub-Systems within a Complex Environment - A Pipeline to Filtrate, Organize and Frame Massive Dataset from Multi-Omics Analyses
Source: PLoS One. 2014 Oct 20;9(10):e110723. doi: 10.1371/journal.pone.0110723 (PMC4203823; doi:10.1371/journal.pone.0110723)
Supplement: Table S1 — Archaea OTUs in number of reads along sampling points. Rows: OTUs. Columns: sampling points. (XLSX) [file pone.0110723.s024.xlsx]

## Sheet: Sheet1
	ara1	p1f1	p1f2	p1f3	p1s	p2f1	p2f2	p2f3	p2s	p3f1	p3f2	p3f3	p3s	ara2
Arc;_Crenarchaeota;_Ak31;_Uncultured_archaeon;_Uncultured_archaeon_57304	0	0	0	0	0	0	0	0	2	0	0	0	0	0
Arc;_Crenarchaeota;_Ak56;_Uncultured_archaeon;_Uncultured_archaeon_74935	0	0	0	0	1	0	0	0	0	0	0	0	0	0
Arc;_Crenarchaeota;_Ak56;_Uncultured_archaeon;_Uncultured_archaeon_None3374	0	0	0	0	4	0	0	0	0	0	0	0	0	0
Arc;_Crenarchaeota;_Ak59_59953	0	0	0	0	0	0	0	0	0	0	0	0	8	0
Arc;_Crenarchaeota;_Ak59_None4024	0	0	0	0	0	0	0	0	0	0	0	0	2	0
Arc;_Crenarchaeota;_Group_c3;_Uncultured_archaeon;_Uncultured_archaeon_None568	0	0	0	0	2	0	0	0	0	0	0	0	0	0
Arc;_Crenarchaeota;_Group_c3;_Uncultured_crenarchaeote;_Uncultured_crenarchaeote_110235	6	0	2	0	39	2	0	9	21	2	4	0	217	3
Arc;_Crenarchaeota;_Group_c3;_Uncultured_crenarchaeote;_Uncultured_crenarchaeote_12509	0	0	0	0	1	0	0	0	1	0	0	0	6	0
Arc;_Crenarchaeota;_Group_c3;_Uncultured_crenarchaeote;_Uncultured_crenarchaeote_93758	0	0	0	0	8	1	0	1	0	1	0	0	6	0
Arc;_Crenarchaeota;_Group_c3;_Uncultured_crenarchaeote;_Uncultured_crenarchaeote_None1769	0	0	0	0	0	0	0	0	0	0	0	0	1	0
Arc;_Crenarchaeota;_Group_c3;_Uncultured_crenarchaeote;_Uncultured_crenarchaeote_None237	0	0	0	0	0	0	0	0	0	0	0	0	1	0
Arc;_Crenarchaeota;_Group_c3;_Uncultured_crenarchaeote;_Uncultured_crenarchaeote_None2658	0	0	0	0	0	0	0	0	0	4	0	0	0	0
Arc;_Crenarchaeota;_Group_c3;_Uncultured_crenarchaeote;_Uncultured_crenarchaeote_None3056	0	0	0	0	0	0	0	0	0	0	0	0	1	0
Arc;_Crenarchaeota;_Group_c3;_Uncultured_crenarchaeote;_Uncultured_crenarchaeote_None4790	0	0	0	0	0	0	0	0	2	0	0	0	0	0
Arc;_Crenarchaeota;_Group_c3;_Uncultured_crenarchaeote;_Uncultured_crenarchaeote_None4819	0	0	0	0	0	0	0	0	0	0	0	0	3	0
Arc;_Crenarchaeota;_Group_c3;_Uncultured_crenarchaeote;_Uncultured_crenarchaeote_None5365	0	0	0	0	0	0	0	0	0	0	0	0	2	0
Arc;_Crenarchaeota;_Group_c3;_Uncultured_crenarchaeote;_Uncultured_crenarchaeote_None6377	0	0	0	0	0	0	0	0	0	0	0	0	10	0
Arc;_Crenarchaeota;_Group_c3;_Uncultured_crenarchaeote;_Uncultured_crenarchaeote_None730	0	0	0	0	0	0	0	0	0	0	0	0	17	0
Arc;_Crenarchaeota;_Group_c3_None1134	0	0	0	0	0	0	0	0	0	0	0	0	4	0
Arc;_Crenarchaeota;_Group_c3_None5043	0	0	0	0	0	0	0	0	0	0	0	0	2	0
Arc;_Crenarchaeota;_Group_c3_None6731	0	0	0	0	0	0	0	0	0	0	0	0	1	0
Arc;_Crenarchaeota;_Group_c3_None7165	1	0	0	0	0	0	0	0	0	0	0	0	0	0
Arc;_Crenarchaeota;_Group_c3_None7569	0	0	0	0	0	0	0	0	1	0	0	0	2	0
Arc;_Crenarchaeota;_Marine_benthic_group_a;_Uncultured_crenarchaeote;_Uncultured_crenarchaeote_24716	0	0	0	0	0	0	0	0	0	0	0	3	4	0
Arc;_Crenarchaeota;_Marine_benthic_group_a;_Uncultured_crenarchaeote;_Uncultured_crenarchaeote_None3172	0	0	0	0	0	0	0	0	0	0	0	0	2	0
Arc;_Crenarchaeota;_Marine_benthic_group_b;_Uncultured_archaeon;_Uncultured_archaeon_59782	0	0	0	0	0	0	0	0	0	0	0	0	9	0
Arc;_Crenarchaeota;_Marine_benthic_group_b;_Uncultured_crenarchaeote;_Uncultured_crenarchaeote_16026	0	0	0	0	1	0	0	0	0	0	0	2	5	0
Arc;_Crenarchaeota;_Marine_benthic_group_b;_Uncultured_crenarchaeote;_Uncultured_crenarchaeote_44490	0	0	0	0	0	0	0	0	0	0	0	0	5	0
Arc;_Crenarchaeota;_Marine_benthic_group_b;_Uncultured_crenarchaeote;_Uncultured_crenarchaeote_86977	0	0	0	0	0	0	0	0	4	0	0	0	7	0
Arc;_Crenarchaeota;_Marine_benthic_group_b;_Uncultured_crenarchaeote;_Uncultured_crenarchaeote_None1126	0	0	0	0	0	0	0	0	0	0	0	0	1	0
Arc;_Crenarchaeota;_Marine_benthic_group_b;_Uncultured_crenarchaeote;_Uncultured_crenarchaeote_None1993	0	0	0	0	0	0	0	0	2	0	0	0	10	1
Arc;_Crenarchaeota;_Marine_benthic_group_b;_Uncultured_crenarchaeote;_Uncultured_crenarchaeote_None3044	0	0	0	0	1	0	0	2	0	0	0	0	0	0
Arc;_Crenarchaeota;_Marine_benthic_group_b;_Uncultured_crenarchaeote;_Uncultured_crenarchaeote_None3857	0	0	0	0	0	0	0	0	0	0	0	0	1	0
Arc;_Crenarchaeota;_Marine_benthic_group_b;_Uncultured_crenarchaeote;_Uncultured_crenarchaeote_None430	1	0	0	0	1	0	0	0	0	0	0	0	6	0
Arc;_Crenarchaeota;_Marine_benthic_group_b;_Uncultured_crenarchaeote;_Uncultured_crenarchaeote_None500	2	0	0	0	0	0	0	0	0	0	0	0	6	0
Arc;_Crenarchaeota;_Marine_benthic_group_b;_Uncultured_crenarchaeote;_Uncultured_crenarchaeote_None5630	0	0	0	0	0	0	0	0	0	0	0	0	1	0
Arc;_Crenarchaeota;_Marine_benthic_group_b;_Uncultured_crenarchaeote;_Uncultured_crenarchaeote_None5867	0	0	0	0	0	0	0	0	0	0	0	0	1	0
Arc;_Crenarchaeota;_Marine_benthic_group_b;_Uncultured_crenarchaeote;_Uncultured_crenarchaeote_None850	0	0	0	0	0	0	0	0	0	0	0	0	1	0
Arc;_Crenarchaeota;_Marine_benthic_group_b;_Uncultured_euryarchaeote;_Uncultured_euryarchaeote_24478	0	0	0	0	0	0	0	0	0	0	0	0	10	0
Arc;_Crenarchaeota;_Marine_benthic_group_b;_Unidentified_archaeon;_Unidentified_archaeon_None1327	0	0	0	0	0	0	0	0	0	0	0	0	4	0
Arc;_Crenarchaeota;_Marine_benthic_group_b_66753	0	0	0	0	0	0	0	0	0	0	0	0	5	0
Arc;_Crenarchaeota;_Marine_benthic_group_b_None1622	0	0	0	0	0	0	0	0	0	0	0	0	4	0
Arc;_Crenarchaeota;_Marine_benthic_group_b_None1829	0	0	0	0	0	0	0	0	0	0	0	0	1	0
Arc;_Crenarchaeota;_Marine_benthic_group_b_None2570	0	0	0	0	0	0	0	0	0	0	0	0	1	0
Arc;_Crenarchaeota;_Marine_benthic_group_b_None5208	0	0	0	0	1	2	0	0	1	0	0	0	6	0
Arc;_Crenarchaeota;_Marine_benthic_group_b_None5507	0	0	0	0	0	0	0	0	0	0	0	0	1	0
Arc;_Crenarchaeota;_Marine_benthic_group_b_None6149	0	0	0	0	0	0	0	0	0	0	0	0	2	0
Arc;_Crenarchaeota;_Marine_benthic_group_b_None7575	0	0	0	0	0	0	0	0	0	0	0	0	4	0
Arc;_Crenarchaeota;_Marine_group_i;_Candidatus_nitrosoarchaeum;_Uncultured_archaeon_1393	2	0	0	0	0	0	0	0	0	0	0	0	1	0
Arc;_Crenarchaeota;_Marine_group_i;_Candidatus_nitrosoarchaeum;_Uncultured_archaeon_20454	405	42	152	16	106	86	4	1	69	6	0	0	99	132
Arc;_Crenarchaeota;_Marine_group_i;_Candidatus_nitrosoarchaeum;_Uncultured_archaeon_2450	15	0	7	2	3	1	0	0	2	0	0	0	0	9
Arc;_Crenarchaeota;_Marine_group_i;_Candidatus_nitrosoarchaeum;_Uncultured_archaeon_25136	7	0	0	0	1	1	0	0	2	0	0	0	20	1
Arc;_Crenarchaeota;_Marine_group_i;_Candidatus_nitrosoarchaeum;_Uncultured_archaeon_None363	0	0	0	0	0	1	0	0	0	0	0	0	1	0
Arc;_Crenarchaeota;_Marine_group_i;_Candidatus_nitrosoarchaeum;_Uncultured_archaeon_None5374	0	0	0	0	1	0	0	0	0	0	0	0	0	0
Arc;_Crenarchaeota;_Marine_group_i;_Candidatus_nitrosoarchaeum;_Uncultured_archaeon_None5952	2	0	0	0	1	1	0	0	0	0	0	0	1	1
Arc;_Crenarchaeota;_Marine_group_i;_Candidatus_nitrosoarchaeum;_Uncultured_archaeon_None633	1	0	0	0	0	0	0	0	0	0	0	0	0	0
Arc;_Crenarchaeota;_Marine_group_i;_Candidatus_nitrosoarchaeum;_Uncultured_archaeon_None6606	3	0	0	0	0	0	0	0	0	0	0	0	4	1
Arc;_Crenarchaeota;_Marine_group_i;_Candidatus_nitrosoarchaeum;_Uncultured_archaeon_None6891	1	0	0	0	0	0	0	0	0	0	0	0	0	2
Arc;_Crenarchaeota;_Marine_group_i;_Candidatus_nitrosoarchaeum;_Uncultured_archaeon_None706	2	0	3	0	3	1	0	0	0	0	0	0	1	2
Arc;_Crenarchaeota;_Marine_group_i;_Candidatus_nitrosoarchaeum;_Uncultured_archaeon_None7246	1	0	0	0	0	0	0	0	0	0	0	0	0	0
Arc;_Crenarchaeota;_Marine_group_i;_Candidatus_nitrosoarchaeum_None1398	2	0	3	0	0	1	0	0	0	0	0	0	0	0
Arc;_Crenarchaeota;_Marine_group_i;_Candidatus_nitrosoarchaeum_None2435	0	0	1	0	0	0	0	0	0	0	0	0	0	0
Arc;_Crenarchaeota;_Marine_group_i;_Candidatus_nitrosoarchaeum_None2671	1	0	1	0	1	0	0	0	0	0	0	0	0	0
Arc;_Crenarchaeota;_Marine_group_i;_Candidatus_nitrosoarchaeum_None2688	0	0	0	0	0	0	0	0	0	0	0	0	1	0
Arc;_Crenarchaeota;_Marine_group_i;_Candidatus_nitrosoarchaeum_None4754	3	0	4	0	0	1	0	0	1	0	0	0	1	0
Arc;_Crenarchaeota;_Marine_group_i;_Candidatus_nitrosoarchaeum_None5755	1	0	0	0	0	0	0	0	0	0	0	0	0	0
Arc;_Crenarchaeota;_Marine_group_i;_Candidatus_nitrosoarchaeum_None7124	10	0	3	1	3	2	0	0	0	0	0	0	2	2
Arc;_Crenarchaeota;_Marine_group_i;_Candidatus_nitrosoarchaeum_None7244	0	0	0	0	1	0	0	0	0	0	0	0	0	0
Arc;_Crenarchaeota;_Marine_group_i;_Marine_metagenome;_Marine_metagenome_None1971	0	0	0	1	0	10	1	3	2	0	0	0	5	2
Arc;_Crenarchaeota;_Marine_group_i;_Marine_metagenome;_Marine_metagenome_None6684	1	0	0	2	0	0	0	0	0	0	0	0	1	0
Arc;_Crenarchaeota;_Marine_group_i;_Uncultured_archaeon;_Uncultured_archaeon_32755	6	5	0	0	6	33	11	12	7	0	0	0	12	0
Arc;_Crenarchaeota;_Marine_group_i;_Uncultured_archaeon;_Uncultured_archaeon_81376	7	0	0	0	0	0	0	0	0	0	0	0	0	0
Arc;_Crenarchaeota;_Marine_group_i;_Uncultured_archaeon;_Uncultured_archaeon_94555	87	71	0	0	49	104	24	28	17	0	0	0	59	11
Arc;_Crenarchaeota;_Marine_group_i;_Uncultured_archaeon;_Uncultured_archaeon_None197	0	0	0	0	0	0	1	0	0	0	0	0	0	0
Arc;_Crenarchaeota;_Marine_group_i;_Uncultured_archaeon;_Uncultured_archaeon_None4014	0	1	0	0	0	0	0	0	0	0	0	0	0	0
Arc;_Crenarchaeota;_Marine_group_i;_Uncultured_archaeon;_Uncultured_archaeon_None6524	0	0	0	0	0	0	0	0	0	0	0	0	1	0
Arc;_Crenarchaeota;_Marine_group_i;_Uncultured_archaeon;_Uncultured_archaeon_None7011	2	0	0	0	0	3	1	2	1	0	0	0	1	0
Arc;_Crenarchaeota;_Marine_group_i;_Uncultured_archaeon_sagma-3;_Uncultured_archaeon_sagma-3_None1039	0	0	0	0	1	0	0	0	0	0	0	0	0	0
Arc;_Crenarchaeota;_Marine_group_i;_Uncultured_archaeon_sagma-3;_Uncultured_archaeon_sagma-3_None2532	0	0	0	0	1	0	0	0	0	0	0	0	0	0
Arc;_Crenarchaeota;_Marine_group_i;_Uncultured_archaeon_sagma-3;_Uncultured_archaeon_sagma-3_None3362	1	0	1	1	0	2	0	0	2	1	0	0	3	0
Arc;_Crenarchaeota;_Marine_group_i;_Uncultured_archaeon_sagma-3;_Uncultured_archaeon_sagma-3_None3707	3	0	2	1	1	0	0	0	0	1	0	0	1	1
Arc;_Crenarchaeota;_Marine_group_i;_Uncultured_archaeon_sagma-3;_Uncultured_archaeon_sagma-3_None3912	2	0	0	0	0	0	0	0	0	0	0	0	1	0
Arc;_Crenarchaeota;_Marine_group_i;_Uncultured_archaeon_sagma-3;_Uncultured_archaeon_sagma-3_None6825	0	0	0	0	0	0	0	0	0	0	0	0	1	0
Arc;_Crenarchaeota;_Marine_group_i;_Uncultured_archaeon_sagma-8;_Uncultured_archaeon_sagma-8_None1739	2	0	0	0	0	0	0	0	0	0	0	0	0	0
Arc;_Crenarchaeota;_Marine_group_i_102368	0	0	0	0	0	0	0	0	0	0	0	0	3	0
Arc;_Crenarchaeota;_Marine_group_i_108503	0	0	0	0	0	0	0	0	0	0	0	0	1	0
Arc;_Crenarchaeota;_Marine_group_i_28014	1	1	1	5	0	2	0	1	0	0	0	0	0	0
Arc;_Crenarchaeota;_Marine_group_i_53799	4	0	0	0	0	0	0	0	0	0	0	0	1	1
Arc;_Crenarchaeota;_Marine_group_i_71050	0	0	0	0	0	0	0	0	0	1	0	0	0	0
Arc;_Crenarchaeota;_Marine_group_i_77668	202	11	50	42	55	34	0	0	38	21	0	0	61	26
Arc;_Crenarchaeota;_Marine_group_i_77910	0	0	0	0	0	0	0	0	0	0	0	0	1	0
Arc;_Crenarchaeota;_Marine_group_i_86572	11	2	0	0	4	2	0	0	0	0	0	0	3	9
Arc;_Crenarchaeota;_Marine_group_i_96221	5	0	0	0	1	0	0	0	0	0	0	0	0	1
Arc;_Crenarchaeota;_Marine_group_i_97167	72	6	19	73	23	123	5	60	26	3	0	0	69	17
Arc;_Crenarchaeota;_Marine_group_i_99986	8	12	0	0	2	8	0	0	7	0	0	0	6	1
Arc;_Crenarchaeota;_Marine_group_i_None1085	0	0	1	0	0	0	0	0	0	0	0	0	0	0
Arc;_Crenarchaeota;_Marine_group_i_None1397	1	0	21	1	1	5	0	0	3	0	0	0	6	0
Arc;_Crenarchaeota;_Marine_group_i_None1418	6	1	5	32	11	52	1	39	13	1	0	0	21	11
Arc;_Crenarchaeota;_Marine_group_i_None1822	0	0	0	1	1	1	0	0	0	0	0	0	0	0
Arc;_Crenarchaeota;_Marine_group_i_None1845	0	0	1	0	0	0	0	0	0	0	0	0	0	0
Arc;_Crenarchaeota;_Marine_group_i_None2	1	0	0	0	0	2	0	0	0	0	0	0	0	0
Arc;_Crenarchaeota;_Marine_group_i_None250	0	0	0	0	0	0	0	0	0	0	0	0	1	0
Arc;_Crenarchaeota;_Marine_group_i_None3794	1	0	0	0	0	0	0	1	0	0	0	0	0	0
Arc;_Crenarchaeota;_Marine_group_i_None4157	0	0	0	0	0	1	0	0	0	0	0	0	0	0
Arc;_Crenarchaeota;_Marine_group_i_None4163	0	0	0	0	0	0	0	0	2	0	0	0	1	0
Arc;_Crenarchaeota;_Marine_group_i_None4369	3	0	0	0	0	0	0	0	0	0	0	0	0	0
Arc;_Crenarchaeota;_Marine_group_i_None4479	0	1	1	1	0	1	0	3	2	0	0	0	0	0
Arc;_Crenarchaeota;_Marine_group_i_None4913	0	0	0	0	0	2	0	0	0	0	0	0	0	0
Arc;_Crenarchaeota;_Marine_group_i_None4976	18	16	0	0	0	6	0	0	0	0	0	0	0	2
Arc;_Crenarchaeota;_Marine_group_i_None5170	1	0	0	0	0	0	0	0	0	0	0	0	2	0
Arc;_Crenarchaeota;_Marine_group_i_None5486	2	0	0	0	0	2	0	0	0	0	0	0	0	0
Arc;_Crenarchaeota;_Marine_group_i_None6435	0	1	0	0	2	0	0	0	0	0	0	0	0	0
Arc;_Crenarchaeota;_Marine_group_i_None6627	0	0	0	0	0	0	0	0	0	0	0	0	1	0
Arc;_Crenarchaeota;_Marine_group_i_None6759	0	1	0	1	0	0	0	0	0	0	0	0	0	0
Arc;_Crenarchaeota;_Marine_group_i_None6974	0	0	0	0	0	1	0	0	0	0	0	0	0	0
Arc;_Crenarchaeota;_Marine_group_i_None7036	2	1	0	0	0	0	0	0	0	0	0	0	0	0
Arc;_Crenarchaeota;_Marine_group_i_None7294	3	4	0	0	2	0	1	1	0	0	0	0	0	0
Arc;_Crenarchaeota;_Marine_group_i_None7556	0	0	0	0	0	1	0	0	0	0	0	0	0	0
Arc;_Crenarchaeota;_Miscellaneous_crenarchaeotic_group;_Uncultured_archaeon;_Uncultured_archaeon_110488	0	0	0	0	0	0	0	0	0	0	0	0	1	0
Arc;_Crenarchaeota;_Miscellaneous_crenarchaeotic_group;_Uncultured_archaeon;_Uncultured_archaeon_43610	0	0	0	0	0	0	0	0	0	0	0	0	4	0
Arc;_Crenarchaeota;_Miscellaneous_crenarchaeotic_group;_Uncultured_archaeon;_Uncultured_archaeon_55723	0	0	0	0	0	0	0	0	0	0	0	0	1	0
Arc;_Crenarchaeota;_Miscellaneous_crenarchaeotic_group;_Uncultured_archaeon;_Uncultured_archaeon_6407	0	0	0	0	0	0	0	1	0	0	0	0	11	0
Arc;_Crenarchaeota;_Miscellaneous_crenarchaeotic_group;_Uncultured_archaeon;_Uncultured_archaeon_85101	0	0	0	0	0	0	0	0	0	0	0	0	3	0
Arc;_Crenarchaeota;_Miscellaneous_crenarchaeotic_group;_Uncultured_archaeon;_Uncultured_archaeon_87980	0	0	0	0	0	0	0	0	0	0	0	0	1	0
Arc;_Crenarchaeota;_Miscellaneous_crenarchaeotic_group;_Uncultured_archaeon;_Uncultured_archaeon_None1272	0	0	0	0	0	0	0	0	0	0	0	0	2	0
Arc;_Crenarchaeota;_Miscellaneous_crenarchaeotic_group;_Uncultured_archaeon;_Uncultured_archaeon_None389	0	0	0	0	0	0	0	0	0	0	0	0	2	0
Arc;_Crenarchaeota;_Miscellaneous_crenarchaeotic_group;_Uncultured_archaeon;_Uncultured_archaeon_None4054	2	0	0	0	0	0	0	0	0	0	0	0	0	0
Arc;_Crenarchaeota;_Miscellaneous_crenarchaeotic_group;_Uncultured_archaeon;_Uncultured_archaeon_None4605	0	0	0	0	0	0	0	0	0	0	0	0	1	0
Arc;_Crenarchaeota;_Miscellaneous_crenarchaeotic_group;_Uncultured_archaeon;_Uncultured_archaeon_None5703	0	0	0	0	0	0	0	1	0	0	0	0	0	0
Arc;_Crenarchaeota;_Miscellaneous_crenarchaeotic_group;_Uncultured_archaeon;_Uncultured_archaeon_None6328	0	0	0	0	0	0	0	0	0	0	0	7	1	0
Arc;_Crenarchaeota;_Miscellaneous_crenarchaeotic_group;_Uncultured_archaeon;_Uncultured_archaeon_None6508	0	0	0	0	0	0	0	0	0	0	0	0	1	0
Arc;_Crenarchaeota;_Miscellaneous_crenarchaeotic_group;_Uncultured_archaeon_arc.201;_Uncultured_archaeon_arc.201_80725	4	0	0	0	2	0	0	0	0	0	0	0	17	12
Arc;_Crenarchaeota;_Miscellaneous_crenarchaeotic_group;_Uncultured_archaeon_arc.201;_Uncultured_archaeon_arc.201_None1464	0	0	0	0	0	0	0	0	0	0	0	0	1	0
Arc;_Crenarchaeota;_Miscellaneous_crenarchaeotic_group;_Uncultured_archaeon_arc.201;_Uncultured_archaeon_arc.201_None1503	0	0	0	0	3	0	0	0	0	0	0	0	1	0
Arc;_Crenarchaeota;_Miscellaneous_crenarchaeotic_group;_Uncultured_archaeon_arc.201;_Uncultured_archaeon_arc.201_None2907	0	0	0	0	3	0	0	0	0	0	0	0	0	0
Arc;_Crenarchaeota;_Miscellaneous_crenarchaeotic_group;_Uncultured_archaeon_arc.201;_Uncultured_archaeon_arc.201_None3109	4	0	0	0	0	1	0	0	1	1	0	0	9	0
Arc;_Crenarchaeota;_Miscellaneous_crenarchaeotic_group;_Uncultured_archaeon_arc.201;_Uncultured_archaeon_arc.201_None4266	1	0	0	0	0	0	0	0	0	0	0	0	0	0
Arc;_Crenarchaeota;_Miscellaneous_crenarchaeotic_group;_Uncultured_archaeon_arc.201;_Uncultured_archaeon_arc.201_None4919	0	0	0	0	0	0	0	0	0	0	0	0	1	0
Arc;_Crenarchaeota;_Miscellaneous_crenarchaeotic_group;_Uncultured_archaeon_arc.201;_Uncultured_archaeon_arc.201_None5862	0	0	0	0	0	0	0	0	0	0	0	0	3	0
Arc;_Crenarchaeota;_Miscellaneous_crenarchaeotic_group;_Uncultured_archaeon_arc.201;_Uncultured_archaeon_arc.201_None5944	0	0	0	0	1	0	0	0	0	0	0	0	0	0
Arc;_Crenarchaeota;_Miscellaneous_crenarchaeotic_group;_Uncultured_archaeon_arc.201;_Uncultured_archaeon_arc.201_None6618	0	0	0	0	4	0	0	0	0	0	0	0	2	0
Arc;_Crenarchaeota;_Miscellaneous_crenarchaeotic_group;_Uncultured_archaeon_arc.201;_Uncultured_archaeon_arc.201_None714	0	0	0	0	0	0	0	0	1	0	0	0	1	0
Arc;_Crenarchaeota;_Miscellaneous_crenarchaeotic_group;_Uncultured_crenarchaeote;_Uncultured_crenarchaeote_105556	0	0	0	0	0	0	0	0	0	0	0	0	1	0
Arc;_Crenarchaeota;_Miscellaneous_crenarchaeotic_group;_Uncultured_crenarchaeote;_Uncultured_crenarchaeote_105847	0	0	0	0	0	0	0	0	0	0	0	0	0	1
Arc;_Crenarchaeota;_Miscellaneous_crenarchaeotic_group;_Uncultured_crenarchaeote;_Uncultured_crenarchaeote_110734	5	0	0	0	0	0	0	0	0	2	0	0	1	0
Arc;_Crenarchaeota;_Miscellaneous_crenarchaeotic_group;_Uncultured_crenarchaeote;_Uncultured_crenarchaeote_22297	0	0	0	0	0	0	0	0	0	0	0	0	0	1
Arc;_Crenarchaeota;_Miscellaneous_crenarchaeotic_group;_Uncultured_crenarchaeote;_Uncultured_crenarchaeote_47164	0	0	0	0	0	0	0	0	0	0	0	0	0	5
Arc;_Crenarchaeota;_Miscellaneous_crenarchaeotic_group;_Uncultured_crenarchaeote;_Uncultured_crenarchaeote_60914	0	0	0	0	0	0	0	0	3	0	0	0	2	0
Arc;_Crenarchaeota;_Miscellaneous_crenarchaeotic_group;_Uncultured_crenarchaeote;_Uncultured_crenarchaeote_65111	1	0	0	0	0	0	0	0	0	0	0	0	0	0
Arc;_Crenarchaeota;_Miscellaneous_crenarchaeotic_group;_Uncultured_crenarchaeote;_Uncultured_crenarchaeote_77569	4	0	0	0	0	0	0	0	0	0	0	0	0	0
Arc;_Crenarchaeota;_Miscellaneous_crenarchaeotic_group;_Uncultured_crenarchaeote;_Uncultured_crenarchaeote_79954	9	0	0	0	0	0	0	0	0	0	0	0	0	0
Arc;_Crenarchaeota;_Miscellaneous_crenarchaeotic_group;_Uncultured_crenarchaeote;_Uncultured_crenarchaeote_81310	10	0	0	0	0	0	0	0	0	0	0	0	0	0
Arc;_Crenarchaeota;_Miscellaneous_crenarchaeotic_group;_Uncultured_crenarchaeote;_Uncultured_crenarchaeote_86457	0	0	0	0	0	0	0	0	0	0	0	0	3	0
Arc;_Crenarchaeota;_Miscellaneous_crenarchaeotic_group;_Uncultured_crenarchaeote;_Uncultured_crenarchaeote_91955	0	0	0	0	0	0	0	0	0	0	0	0	4	2
Arc;_Crenarchaeota;_Miscellaneous_crenarchaeotic_group;_Uncultured_crenarchaeote;_Uncultured_crenarchaeote_None2391	0	0	0	0	0	0	0	0	0	0	0	0	1	0
Arc;_Crenarchaeota;_Miscellaneous_crenarchaeotic_group;_Uncultured_crenarchaeote;_Uncultured_crenarchaeote_None2777	0	0	0	0	0	0	0	0	0	0	0	0	1	0
Arc;_Crenarchaeota;_Miscellaneous_crenarchaeotic_group;_Uncultured_crenarchaeote;_Uncultured_crenarchaeote_None3079	0	0	0	0	0	0	0	0	0	0	0	0	0	7
Arc;_Crenarchaeota;_Miscellaneous_crenarchaeotic_group;_Uncultured_crenarchaeote;_Uncultured_crenarchaeote_None3746	0	0	0	0	0	0	0	0	0	0	0	0	1	0
Arc;_Crenarchaeota;_Miscellaneous_crenarchaeotic_group;_Uncultured_crenarchaeote;_Uncultured_crenarchaeote_None5218	0	0	0	0	0	0	0	0	0	0	0	0	2	0
Arc;_Crenarchaeota;_Miscellaneous_crenarchaeotic_group;_Uncultured_crenarchaeote;_Uncultured_crenarchaeote_None5834	0	0	0	0	0	0	0	0	0	0	0	0	4	0
Arc;_Crenarchaeota;_Miscellaneous_crenarchaeotic_group;_Uncultured_crenarchaeote;_Uncultured_crenarchaeote_None6117	1	0	0	0	0	0	0	0	0	0	0	0	0	0
Arc;_Crenarchaeota;_Miscellaneous_crenarchaeotic_group;_Uncultured_crenarchaeote;_Uncultured_crenarchaeote_None6146	0	0	0	0	0	0	0	0	0	0	0	0	0	6
Arc;_Crenarchaeota;_Miscellaneous_crenarchaeotic_group;_Uncultured_crenarchaeote_mcg;_Uncultured_crenarchaeote_mcg_6443	0	0	0	0	0	0	0	4	0	0	0	8	4	0
Arc;_Crenarchaeota;_Miscellaneous_crenarchaeotic_group;_Uncultured_methanogenic_archaeon;_Uncultured_methanogenic_archaeon_107209	0	0	0	1	10	0	0	4	0	0	0	0	2	0
Arc;_Crenarchaeota;_Miscellaneous_crenarchaeotic_group;_Uncultured_methanogenic_archaeon;_Uncultured_methanogenic_archaeon_28248	0	1	0	0	29	3	0	24	17	1	0	16	95	0
Arc;_Crenarchaeota;_Miscellaneous_crenarchaeotic_group;_Uncultured_methanogenic_archaeon;_Uncultured_methanogenic_archaeon_31495	0	0	0	0	2	0	0	2	0	0	0	0	4	0
Arc;_Crenarchaeota;_Miscellaneous_crenarchaeotic_group;_Uncultured_methanogenic_archaeon;_Uncultured_methanogenic_archaeon_3622	0	0	0	0	0	0	0	0	1	0	0	0	0	0
Arc;_Crenarchaeota;_Miscellaneous_crenarchaeotic_group;_Uncultured_methanogenic_archaeon;_Uncultured_methanogenic_archaeon_37065	0	0	0	0	0	0	0	0	0	0	0	0	4	0
Arc;_Crenarchaeota;_Miscellaneous_crenarchaeotic_group;_Uncultured_methanogenic_archaeon;_Uncultured_methanogenic_archaeon_41503	0	0	0	0	31	0	0	0	41	0	0	0	119	1
Arc;_Crenarchaeota;_Miscellaneous_crenarchaeotic_group;_Uncultured_methanogenic_archaeon;_Uncultured_methanogenic_archaeon_41826	0	0	0	0	1	0	0	1	2	0	0	0	8	0
Arc;_Crenarchaeota;_Miscellaneous_crenarchaeotic_group;_Uncultured_methanogenic_archaeon;_Uncultured_methanogenic_archaeon_81409	0	0	0	0	0	0	0	0	8	0	0	0	41	0
Arc;_Crenarchaeota;_Miscellaneous_crenarchaeotic_group;_Uncultured_methanogenic_archaeon;_Uncultured_methanogenic_archaeon_84036	9	12	8	7	71	1	0	28	38	0	1	33	24	0
Arc;_Crenarchaeota;_Miscellaneous_crenarchaeotic_group;_Uncultured_methanogenic_archaeon;_Uncultured_methanogenic_archaeon_91767	0	1	5	0	3	2	0	0	1	0	0	7	7	0
Arc;_Crenarchaeota;_Miscellaneous_crenarchaeotic_group;_Uncultured_methanogenic_archaeon;_Uncultured_methanogenic_archaeon_None1215	0	0	0	0	0	0	0	0	0	0	0	0	1	0
Arc;_Crenarchaeota;_Miscellaneous_crenarchaeotic_group;_Uncultured_methanogenic_archaeon;_Uncultured_methanogenic_archaeon_None1375	0	0	0	0	0	0	0	1	0	0	0	0	0	0
Arc;_Crenarchaeota;_Miscellaneous_crenarchaeotic_group;_Uncultured_methanogenic_archaeon;_Uncultured_methanogenic_archaeon_None2591	0	0	0	0	0	0	0	0	0	0	0	2	0	0
Arc;_Crenarchaeota;_Miscellaneous_crenarchaeotic_group;_Uncultured_methanogenic_archaeon;_Uncultured_methanogenic_archaeon_None2737	0	0	0	0	1	0	0	0	0	0	0	0	6	0
Arc;_Crenarchaeota;_Miscellaneous_crenarchaeotic_group;_Uncultured_methanogenic_archaeon;_Uncultured_methanogenic_archaeon_None2855	0	0	0	0	0	0	0	0	0	0	0	0	1	0
Arc;_Crenarchaeota;_Miscellaneous_crenarchaeotic_group;_Uncultured_methanogenic_archaeon;_Uncultured_methanogenic_archaeon_None2879	0	0	0	0	0	0	0	0	0	0	0	0	1	0
Arc;_Crenarchaeota;_Miscellaneous_crenarchaeotic_group;_Uncultured_methanogenic_archaeon;_Uncultured_methanogenic_archaeon_None29	0	0	0	0	0	0	0	0	1	0	0	3	0	0
Arc;_Crenarchaeota;_Miscellaneous_crenarchaeotic_group;_Uncultured_methanogenic_archaeon;_Uncultured_methanogenic_archaeon_None3301	0	0	0	0	0	0	0	0	0	0	0	0	2	0
Arc;_Crenarchaeota;_Miscellaneous_crenarchaeotic_group;_Uncultured_methanogenic_archaeon;_Uncultured_methanogenic_archaeon_None3398	0	0	0	1	2	0	0	1	2	0	0	0	18	0
Arc;_Crenarchaeota;_Miscellaneous_crenarchaeotic_group;_Uncultured_methanogenic_archaeon;_Uncultured_methanogenic_archaeon_None3408	0	0	0	0	0	0	0	0	0	0	0	0	4	0
Arc;_Crenarchaeota;_Miscellaneous_crenarchaeotic_group;_Uncultured_methanogenic_archaeon;_Uncultured_methanogenic_archaeon_None3550	0	0	0	0	0	0	0	1	0	0	0	0	1	0
Arc;_Crenarchaeota;_Miscellaneous_crenarchaeotic_group;_Uncultured_methanogenic_archaeon;_Uncultured_methanogenic_archaeon_None468	0	0	0	0	0	0	0	0	0	0	0	0	2	0
Arc;_Crenarchaeota;_Miscellaneous_crenarchaeotic_group;_Uncultured_methanogenic_archaeon;_Uncultured_methanogenic_archaeon_None4747	0	0	1	0	0	0	0	0	0	0	0	0	0	0
Arc;_Crenarchaeota;_Miscellaneous_crenarchaeotic_group;_Uncultured_methanogenic_archaeon;_Uncultured_methanogenic_archaeon_None5967	0	0	0	0	1	0	0	0	2	0	0	1	0	0
Arc;_Crenarchaeota;_Miscellaneous_crenarchaeotic_group;_Uncultured_methanogenic_archaeon;_Uncultured_methanogenic_archaeon_None6113	0	0	0	0	0	0	0	2	0	0	0	1	7	0
Arc;_Crenarchaeota;_Miscellaneous_crenarchaeotic_group;_Uncultured_methanogenic_archaeon;_Uncultured_methanogenic_archaeon_None6361	0	0	0	0	0	0	0	0	0	0	0	0	1	0
Arc;_Crenarchaeota;_Miscellaneous_crenarchaeotic_group;_Uncultured_methanogenic_archaeon;_Uncultured_methanogenic_archaeon_None6392	1	0	0	0	0	0	0	1	1	0	0	1	1	0
Arc;_Crenarchaeota;_Miscellaneous_crenarchaeotic_group;_Uncultured_methanogenic_archaeon;_Uncultured_methanogenic_archaeon_None6719	0	0	0	0	0	0	0	1	0	0	0	0	0	0
Arc;_Crenarchaeota;_Miscellaneous_crenarchaeotic_group;_Uncultured_methanogenic_archaeon;_Uncultured_methanogenic_archaeon_None740	0	0	0	0	0	0	0	1	0	0	0	0	0	0
Arc;_Crenarchaeota;_Miscellaneous_crenarchaeotic_group;_Uncultured_methanogenic_archaeon;_Uncultured_methanogenic_archaeon_None7445	0	0	0	0	0	0	0	0	1	0	0	0	2	0
Arc;_Crenarchaeota;_Miscellaneous_crenarchaeotic_group;_Uncultured_methanogenic_archaeon;_Uncultured_methanogenic_archaeon_None781	0	0	1	0	3	0	0	3	7	0	0	0	30	0
Arc;_Crenarchaeota;_Miscellaneous_crenarchaeotic_group;_Uncultured_methanogenic_archaeon;_Uncultured_methanogenic_archaeon_None886	0	0	0	0	1	0	0	0	1	0	0	0	3	0
Arc;_Crenarchaeota;_Miscellaneous_crenarchaeotic_group;_Unidentified_archaeon;_Unidentified_archaeon_78897	3	0	0	0	27	0	3	3	19	0	0	11	228	9
Arc;_Crenarchaeota;_Miscellaneous_crenarchaeotic_group;_Unidentified_archaeon;_Unidentified_archaeon_None2296	0	0	0	0	0	0	0	1	1	0	0	0	0	0
Arc;_Crenarchaeota;_Miscellaneous_crenarchaeotic_group;_Unidentified_archaeon;_Unidentified_archaeon_None3696	0	0	0	0	3	0	0	0	6	0	0	0	32	0
Arc;_Crenarchaeota;_Miscellaneous_crenarchaeotic_group;_Unidentified_archaeon;_Unidentified_archaeon_None3957	1	0	0	0	0	0	0	0	0	0	0	0	0	1
Arc;_Crenarchaeota;_Miscellaneous_crenarchaeotic_group;_Unidentified_archaeon;_Unidentified_archaeon_None6047	0	0	0	0	0	0	0	0	0	0	0	0	6	0
Arc;_Crenarchaeota;_Miscellaneous_crenarchaeotic_group_10634	0	5	0	3	39	0	0	35	5	3	8	4	96	0
Arc;_Crenarchaeota;_Miscellaneous_crenarchaeotic_group_13860	0	0	0	0	0	0	0	0	0	0	0	0	1	0
Arc;_Crenarchaeota;_Miscellaneous_crenarchaeotic_group_18925	6	0	0	0	1	0	0	0	0	0	0	0	34	0
Arc;_Crenarchaeota;_Miscellaneous_crenarchaeotic_group_21036	10	0	0	0	0	0	0	0	0	0	0	0	10	0
Arc;_Crenarchaeota;_Miscellaneous_crenarchaeotic_group_25565	0	1	0	0	10	0	0	0	0	0	0	0	25	0
Arc;_Crenarchaeota;_Miscellaneous_crenarchaeotic_group_27293	0	0	0	0	0	0	0	0	0	4	0	0	0	0
Arc;_Crenarchaeota;_Miscellaneous_crenarchaeotic_group_30961	0	2	0	0	4	0	0	1	3	6	0	0	14	0
Arc;_Crenarchaeota;_Miscellaneous_crenarchaeotic_group_33354	0	0	0	0	2	0	0	0	0	0	0	0	0	1
Arc;_Crenarchaeota;_Miscellaneous_crenarchaeotic_group_40378	0	0	0	0	0	0	0	0	7	0	0	0	0	0
Arc;_Crenarchaeota;_Miscellaneous_crenarchaeotic_group_44480	6	4	3	0	93	5	3	31	87	2	0	16	289	10
Arc;_Crenarchaeota;_Miscellaneous_crenarchaeotic_group_48931	0	0	0	0	0	0	0	0	0	0	0	0	21	0
Arc;_Crenarchaeota;_Miscellaneous_crenarchaeotic_group_53019	0	0	0	0	0	0	0	0	0	4	0	0	3	0
Arc;_Crenarchaeota;_Miscellaneous_crenarchaeotic_group_53269	6	0	0	0	0	0	0	0	1	0	0	0	1	0
Arc;_Crenarchaeota;_Miscellaneous_crenarchaeotic_group_86057	0	0	0	0	2	0	0	1	0	0	0	0	0	0
Arc;_Crenarchaeota;_Miscellaneous_crenarchaeotic_group_93596	0	0	0	0	0	0	0	0	1	0	0	0	1	0
Arc;_Crenarchaeota;_Miscellaneous_crenarchaeotic_group_94985	0	2	0	0	5	0	0	4	4	0	0	0	27	0
Arc;_Crenarchaeota;_Miscellaneous_crenarchaeotic_group_None1540	0	0	0	0	0	0	0	0	5	1	0	0	0	0
Arc;_Crenarchaeota;_Miscellaneous_crenarchaeotic_group_None1629	0	0	0	0	2	1	0	0	0	3	0	0	9	0
Arc;_Crenarchaeota;_Miscellaneous_crenarchaeotic_group_None1635	0	1	0	0	1	0	0	0	0	0	0	0	3	0
Arc;_Crenarchaeota;_Miscellaneous_crenarchaeotic_group_None1759	0	0	0	0	0	0	0	0	0	0	0	0	3	0
Arc;_Crenarchaeota;_Miscellaneous_crenarchaeotic_group_None2047	0	0	0	0	1	0	0	0	0	0	0	0	0	0
Arc;_Crenarchaeota;_Miscellaneous_crenarchaeotic_group_None2242	0	0	0	0	2	0	0	0	0	0	0	0	0	0
Arc;_Crenarchaeota;_Miscellaneous_crenarchaeotic_group_None2644	0	0	0	0	0	0	0	0	2	0	0	0	0	0
Arc;_Crenarchaeota;_Miscellaneous_crenarchaeotic_group_None2687	0	0	0	0	0	0	0	0	0	0	0	0	1	0
Arc;_Crenarchaeota;_Miscellaneous_crenarchaeotic_group_None3045	0	0	0	0	0	0	0	0	0	1	0	0	0	0
Arc;_Crenarchaeota;_Miscellaneous_crenarchaeotic_group_None3596	0	0	0	0	0	0	0	0	0	0	0	0	1	0
Arc;_Crenarchaeota;_Miscellaneous_crenarchaeotic_group_None3989	0	0	0	0	0	0	0	0	0	0	0	0	4	0
Arc;_Crenarchaeota;_Miscellaneous_crenarchaeotic_group_None4192	0	0	0	0	2	0	0	0	0	0	0	0	1	0
Arc;_Crenarchaeota;_Miscellaneous_crenarchaeotic_group_None4198	0	0	0	0	0	0	0	0	0	0	0	0	4	0
Arc;_Crenarchaeota;_Miscellaneous_crenarchaeotic_group_None4279	0	1	0	0	0	0	0	0	0	0	0	0	0	0
Arc;_Crenarchaeota;_Miscellaneous_crenarchaeotic_group_None4643	0	0	0	0	1	0	0	2	5	0	0	0	12	0
Arc;_Crenarchaeota;_Miscellaneous_crenarchaeotic_group_None4686	0	0	0	0	0	0	0	0	0	0	0	0	1	0
Arc;_Crenarchaeota;_Miscellaneous_crenarchaeotic_group_None4763	0	0	0	0	0	0	0	0	0	0	0	0	1	0
Arc;_Crenarchaeota;_Miscellaneous_crenarchaeotic_group_None4808	0	0	0	0	0	0	0	0	0	2	0	0	0	0
Arc;_Crenarchaeota;_Miscellaneous_crenarchaeotic_group_None4899	0	0	0	0	0	0	0	0	0	0	0	0	2	0
Arc;_Crenarchaeota;_Miscellaneous_crenarchaeotic_group_None4979	0	0	0	0	0	0	0	0	0	0	0	0	2	0
Arc;_Crenarchaeota;_Miscellaneous_crenarchaeotic_group_None5013	0	0	0	0	0	0	0	0	2	0	0	0	3	0
Arc;_Crenarchaeota;_Miscellaneous_crenarchaeotic_group_None5039	0	0	0	0	0	0	0	0	0	0	0	0	11	0
Arc;_Crenarchaeota;_Miscellaneous_crenarchaeotic_group_None5058	3	0	0	0	1	0	0	0	0	0	0	0	1	0
Arc;_Crenarchaeota;_Miscellaneous_crenarchaeotic_group_None557	0	0	0	0	0	0	0	0	2	0	0	0	5	0
Arc;_Crenarchaeota;_Miscellaneous_crenarchaeotic_group_None5664	0	0	0	0	0	0	0	0	0	0	0	0	4	0
Arc;_Crenarchaeota;_Miscellaneous_crenarchaeotic_group_None6138	0	0	0	0	1	0	0	0	0	0	0	0	0	0
Arc;_Crenarchaeota;_Miscellaneous_crenarchaeotic_group_None6213	0	0	0	0	0	0	0	0	0	0	0	0	6	0
Arc;_Crenarchaeota;_Miscellaneous_crenarchaeotic_group_None6277	0	0	0	0	0	0	0	0	0	0	0	0	14	0
Arc;_Crenarchaeota;_Miscellaneous_crenarchaeotic_group_None6446	0	0	0	0	0	0	0	0	0	0	0	0	1	0
Arc;_Crenarchaeota;_Miscellaneous_crenarchaeotic_group_None645	0	0	0	0	0	0	0	0	0	0	0	0	2	0
Arc;_Crenarchaeota;_Miscellaneous_crenarchaeotic_group_None6560	0	0	0	0	1	0	0	0	0	0	0	0	0	1
Arc;_Crenarchaeota;_Miscellaneous_crenarchaeotic_group_None6999	0	0	0	0	0	0	0	0	1	0	0	0	0	0
Arc;_Crenarchaeota;_Miscellaneous_crenarchaeotic_group_None7087	0	0	0	0	0	0	0	0	0	0	0	0	1	0
Arc;_Crenarchaeota;_Miscellaneous_crenarchaeotic_group_None7313	0	0	0	0	0	0	0	0	0	0	0	0	21	0
Arc;_Crenarchaeota;_Miscellaneous_crenarchaeotic_group_None7331	6	0	0	0	0	0	0	0	0	0	0	0	0	0
Arc;_Crenarchaeota;_Miscellaneous_crenarchaeotic_group_None753	0	0	0	0	0	0	0	0	0	0	0	0	2	0
Arc;_Crenarchaeota;_Miscellaneous_crenarchaeotic_group_None7576	0	0	0	0	0	0	0	0	0	0	0	0	1	0
Arc;_Crenarchaeota;_Psl12;_Uncultured_archaeon;_Uncultured_archaeon_None3457	0	0	0	0	0	0	0	0	0	0	0	0	1	0
Arc;_Crenarchaeota;_Psl12;_Uncultured_archaeon;_Uncultured_archaeon_None5015	0	0	0	0	0	0	0	0	0	0	0	0	2	0
Arc;_Crenarchaeota;_Soil_crenarchaeotic_group(scg);_Candidatus_nitrososphaera;_Uncultured_crenarchaeote_8095	0	0	0	0	0	0	0	0	0	0	0	0	1	0
Arc;_Crenarchaeota;_Soil_crenarchaeotic_group(scg);_Candidatus_nitrososphaera;_Uncultured_crenarchaeote_None2232	1	0	0	0	0	0	0	0	1	0	0	0	0	0
Arc;_Crenarchaeota;_Soil_crenarchaeotic_group(scg);_Candidatus_nitrososphaera;_Uncultured_crenarchaeote_None969	2	1	2	0	0	0	0	0	0	0	0	0	0	0
Arc;_Crenarchaeota;_Soil_crenarchaeotic_group(scg);_Candidatus_nitrososphaera_10882	0	4	4	0	0	0	0	0	0	0	0	0	1	2
Arc;_Crenarchaeota;_Soil_crenarchaeotic_group(scg);_Candidatus_nitrososphaera_19795	2	0	0	0	0	0	0	2	0	0	0	0	0	5
Arc;_Crenarchaeota;_Soil_crenarchaeotic_group(scg);_Candidatus_nitrososphaera_47027	1	1	0	0	0	0	0	1	3	0	0	0	0	0
Arc;_Crenarchaeota;_Soil_crenarchaeotic_group(scg);_Candidatus_nitrososphaera_64716	0	1	0	0	0	0	0	0	0	0	0	0	0	0
Arc;_Crenarchaeota;_Soil_crenarchaeotic_group(scg);_Candidatus_nitrososphaera_70270	0	0	0	0	0	0	0	0	1	0	0	0	0	0
Arc;_Crenarchaeota;_Soil_crenarchaeotic_group(scg);_Candidatus_nitrososphaera_90186	0	0	0	0	0	0	0	1	0	0	0	0	0	0
Arc;_Crenarchaeota;_Soil_crenarchaeotic_group(scg);_Candidatus_nitrososphaera_None1267	1	1	0	0	0	0	1	19	9	0	2	0	0	0
Arc;_Crenarchaeota;_Soil_crenarchaeotic_group(scg);_Candidatus_nitrososphaera_None1615	1	0	0	0	0	0	0	0	0	1	0	0	4	2
Arc;_Crenarchaeota;_Soil_crenarchaeotic_group(scg);_Candidatus_nitrososphaera_None1852	0	0	0	0	0	0	0	0	1	0	0	0	0	0
Arc;_Crenarchaeota;_Soil_crenarchaeotic_group(scg);_Candidatus_nitrososphaera_None1908	1	0	0	0	0	0	2	0	0	0	0	0	0	0
Arc;_Crenarchaeota;_Soil_crenarchaeotic_group(scg);_Candidatus_nitrososphaera_None2275	0	0	0	0	0	0	0	2	0	0	0	0	0	0
Arc;_Crenarchaeota;_Soil_crenarchaeotic_group(scg);_Candidatus_nitrososphaera_None3594	2	3	0	0	0	8	2	0	5	4	0	0	3	4
Arc;_Crenarchaeota;_Soil_crenarchaeotic_group(scg);_Candidatus_nitrososphaera_None3637	0	1	0	0	0	0	0	6	4	0	0	0	0	0
Arc;_Crenarchaeota;_Soil_crenarchaeotic_group(scg);_Candidatus_nitrososphaera_None4388	0	0	0	0	0	0	0	1	2	0	6	0	0	0
Arc;_Crenarchaeota;_Soil_crenarchaeotic_group(scg);_Candidatus_nitrososphaera_None4923	0	1	4	0	0	3	5	0	2	1	0	0	1	1
Arc;_Crenarchaeota;_Soil_crenarchaeotic_group(scg);_Candidatus_nitrososphaera_None5268	1	2	1	0	0	1	1	0	1	1	0	0	0	1
Arc;_Crenarchaeota;_Soil_crenarchaeotic_group(scg);_Candidatus_nitrososphaera_None5566	0	0	0	0	0	0	0	0	0	0	4	0	0	0
Arc;_Crenarchaeota;_Soil_crenarchaeotic_group(scg);_Candidatus_nitrososphaera_None7042	0	0	0	0	0	0	0	0	1	0	5	0	0	0
Arc;_Crenarchaeota;_Soil_crenarchaeotic_group(scg);_Candidatus_nitrososphaera_None7341	0	2	3	1	0	1	2	1	1	0	0	0	0	0
Arc;_Crenarchaeota;_Soil_crenarchaeotic_group(scg);_Crenarchaeota;_Crenarchaeota_None1664	0	0	0	0	0	0	0	0	2	0	0	0	0	0
Arc;_Crenarchaeota;_Soil_crenarchaeotic_group(scg);_Uncultured_archaeon;_Uncultured_archaeon_30471	0	12	2	2	0	0	0	1	0	0	0	0	1	0
Arc;_Crenarchaeota;_Soil_crenarchaeotic_group(scg);_Uncultured_archaeon;_Uncultured_archaeon_35499	7	15	11	0	1	0	0	2	0	3	0	0	0	1
Arc;_Crenarchaeota;_Soil_crenarchaeotic_group(scg);_Uncultured_archaeon;_Uncultured_archaeon_76280	0	1	2	0	0	0	0	0	0	0	0	0	0	0
Arc;_Crenarchaeota;_Soil_crenarchaeotic_group(scg);_Uncultured_archaeon;_Uncultured_archaeon_81814	0	0	0	0	0	1	0	49	74	4	73	52	39	0
Arc;_Crenarchaeota;_Soil_crenarchaeotic_group(scg);_Uncultured_archaeon;_Uncultured_archaeon_None829	0	0	0	0	0	0	0	0	0	0	0	0	0	1
Arc;_Crenarchaeota;_Soil_crenarchaeotic_group(scg);_Uncultured_compost_archaeon;_Uncultured_compost_archaeon_None1630	1	0	0	0	0	1	0	2	7	2	0	0	1	0
Arc;_Crenarchaeota;_Soil_crenarchaeotic_group(scg);_Uncultured_crenarchaeote;_Uncultured_crenarchaeote_11013	0	0	0	0	0	0	0	1	2	0	0	0	0	0
Arc;_Crenarchaeota;_Soil_crenarchaeotic_group(scg);_Uncultured_crenarchaeote;_Uncultured_crenarchaeote_16161	20	0	0	0	0	0	0	2	20	0	0	0	4	4
Arc;_Crenarchaeota;_Soil_crenarchaeotic_group(scg);_Uncultured_crenarchaeote;_Uncultured_crenarchaeote_20042	0	0	0	0	0	0	0	0	0	0	0	0	17	2
Arc;_Crenarchaeota;_Soil_crenarchaeotic_group(scg);_Uncultured_crenarchaeote;_Uncultured_crenarchaeote_34908	0	3	5	0	3	0	0	1	1	0	0	0	0	0
Arc;_Crenarchaeota;_Soil_crenarchaeotic_group(scg);_Uncultured_crenarchaeote;_Uncultured_crenarchaeote_57241	5	0	0	0	0	0	18	0	0	0	0	0	10	0
Arc;_Crenarchaeota;_Soil_crenarchaeotic_group(scg);_Uncultured_crenarchaeote;_Uncultured_crenarchaeote_62068	4	1	0	0	0	0	0	0	0	0	0	0	0	0
Arc;_Crenarchaeota;_Soil_crenarchaeotic_group(scg);_Uncultured_crenarchaeote;_Uncultured_crenarchaeote_64459	0	0	0	0	0	1	0	9	44	2	29	3	12	0
Arc;_Crenarchaeota;_Soil_crenarchaeotic_group(scg);_Uncultured_crenarchaeote;_Uncultured_crenarchaeote_71683	2	0	0	0	0	0	3	0	0	0	0	0	0	0
Arc;_Crenarchaeota;_Soil_crenarchaeotic_group(scg);_Uncultured_crenarchaeote;_Uncultured_crenarchaeote_786	0	0	0	0	0	0	0	0	0	0	0	0	0	4
Arc;_Crenarchaeota;_Soil_crenarchaeotic_group(scg);_Uncultured_crenarchaeote;_Uncultured_crenarchaeote_84662	11	2	1	3	1	0	0	0	0	0	0	0	0	3
Arc;_Crenarchaeota;_Soil_crenarchaeotic_group(scg);_Uncultured_crenarchaeote;_Uncultured_crenarchaeote_None2162	2	0	0	0	0	0	0	0	3	0	0	0	0	0
Arc;_Crenarchaeota;_Soil_crenarchaeotic_group(scg);_Uncultured_crenarchaeote;_Uncultured_crenarchaeote_None2273	0	0	0	0	0	0	0	1	0	0	0	0	1	0
Arc;_Crenarchaeota;_Soil_crenarchaeotic_group(scg);_Uncultured_crenarchaeote;_Uncultured_crenarchaeote_None24	6	4	5	4	1	1	0	2	3	0	0	0	1	4
Arc;_Crenarchaeota;_Soil_crenarchaeotic_group(scg);_Uncultured_crenarchaeote;_Uncultured_crenarchaeote_None2508	1	2	0	0	0	1	0	0	1	0	0	0	0	0
Arc;_Crenarchaeota;_Soil_crenarchaeotic_group(scg);_Uncultured_crenarchaeote;_Uncultured_crenarchaeote_None279	9	10	22	8	7	0	3	9	9	0	0	0	3	1
Arc;_Crenarchaeota;_Soil_crenarchaeotic_group(scg);_Uncultured_crenarchaeote;_Uncultured_crenarchaeote_None2904	0	0	0	0	0	0	0	2	3	0	0	0	1	0
Arc;_Crenarchaeota;_Soil_crenarchaeotic_group(scg);_Uncultured_crenarchaeote;_Uncultured_crenarchaeote_None303	2	0	0	0	0	2	0	5	6	1	0	0	2	2
Arc;_Crenarchaeota;_Soil_crenarchaeotic_group(scg);_Uncultured_crenarchaeote;_Uncultured_crenarchaeote_None3602	0	1	6	0	2	0	0	0	1	0	0	0	1	2
Arc;_Crenarchaeota;_Soil_crenarchaeotic_group(scg);_Uncultured_crenarchaeote;_Uncultured_crenarchaeote_None5231	0	0	0	0	0	0	0	0	0	0	0	0	1	0
Arc;_Crenarchaeota;_Soil_crenarchaeotic_group(scg);_Uncultured_crenarchaeote;_Uncultured_crenarchaeote_None5939	0	0	0	0	0	0	0	1	0	0	0	0	0	0
Arc;_Crenarchaeota;_Soil_crenarchaeotic_group(scg);_Uncultured_crenarchaeote;_Uncultured_crenarchaeote_None6254	0	0	0	0	0	0	0	2	0	0	0	0	1	0
Arc;_Crenarchaeota;_Soil_crenarchaeotic_group(scg);_Uncultured_crenarchaeote;_Uncultured_crenarchaeote_None6376	0	0	0	0	0	0	0	0	0	0	0	0	1	0
Arc;_Crenarchaeota;_Soil_crenarchaeotic_group(scg);_Uncultured_crenarchaeote;_Uncultured_crenarchaeote_None7462	0	1	2	0	1	1	0	1	3	0	0	0	0	0
Arc;_Crenarchaeota;_Soil_crenarchaeotic_group(scg);_Uncultured_crenarchaeote;_Uncultured_crenarchaeote_None7523	6	0	0	0	0	0	2	14	2	0	0	1	2	0
Arc;_Crenarchaeota;_Soil_crenarchaeotic_group(scg);_Unidentified_archaeon;_Unidentified_archaeon_None3532	0	0	0	0	0	0	0	0	2	0	1	0	0	0
Arc;_Crenarchaeota;_Soil_crenarchaeotic_group(scg);_Unidentified_archaeon;_Unidentified_archaeon_None3692	0	0	0	0	0	0	0	4	0	0	0	0	1	0
Arc;_Crenarchaeota;_Soil_crenarchaeotic_group(scg);_Unidentified_archaeon_sca1150;_Unidentified_archaeon_sca1150_90244	0	2	1	0	0	0	0	0	0	0	0	0	0	0
Arc;_Crenarchaeota;_Soil_crenarchaeotic_group(scg);_Unidentified_archaeon_sca1158;_Unidentified_archaeon_sca1158_None3540	0	0	0	0	0	0	0	0	1	0	2	0	0	0
Arc;_Crenarchaeota;_Soil_crenarchaeotic_group(scg);_Unidentified_archaeon_sca1166;_Unidentified_archaeon_sca1166_None3784	0	0	0	0	0	0	0	0	0	1	1	0	0	0
Arc;_Crenarchaeota;_Soil_crenarchaeotic_group(scg)_104159	39	36	35	6	7	2	16	55	71	6	0	1	8	26
Arc;_Crenarchaeota;_Soil_crenarchaeotic_group(scg)_107585	2	0	0	0	0	0	0	9	2	2	1	2	5	0
Arc;_Crenarchaeota;_Soil_crenarchaeotic_group(scg)_11258	0	0	0	1	0	1	0	0	4	0	1	0	0	0
Arc;_Crenarchaeota;_Soil_crenarchaeotic_group(scg)_15673	1	5	4	0	0	0	0	0	0	0	0	0	0	1
Arc;_Crenarchaeota;_Soil_crenarchaeotic_group(scg)_21996	5	0	0	0	0	0	3	10	6	0	0	0	0	0
Arc;_Crenarchaeota;_Soil_crenarchaeotic_group(scg)_32640	0	0	0	0	0	0	0	5	0	0	0	0	0	0
Arc;_Crenarchaeota;_Soil_crenarchaeotic_group(scg)_34745	15	0	0	0	0	0	8	24	24	0	14	11	6	0
Arc;_Crenarchaeota;_Soil_crenarchaeotic_group(scg)_37610	5	5	7	0	4	0	0	0	5	0	0	0	2	4
Arc;_Crenarchaeota;_Soil_crenarchaeotic_group(scg)_37850	73	24	69	11	15	2	30	209	67	11	8	16	32	15
Arc;_Crenarchaeota;_Soil_crenarchaeotic_group(scg)_38167	0	2	0	0	0	0	0	0	0	0	0	0	1	0
Arc;_Crenarchaeota;_Soil_crenarchaeotic_group(scg)_44906	0	6	1	0	0	2	2	1	1	0	0	0	0	0
Arc;_Crenarchaeota;_Soil_crenarchaeotic_group(scg)_47083	0	1	0	0	0	0	0	0	0	0	0	0	0	0
Arc;_Crenarchaeota;_Soil_crenarchaeotic_group(scg)_48939	0	3	1	2	0	3	0	2	5	0	0	0	0	0
Arc;_Crenarchaeota;_Soil_crenarchaeotic_group(scg)_5084	0	0	0	0	3	2	1	12	5	0	0	0	0	0
Arc;_Crenarchaeota;_Soil_crenarchaeotic_group(scg)_52596	2	0	2	0	4	0	0	8	10	1	7	0	15	0
Arc;_Crenarchaeota;_Soil_crenarchaeotic_group(scg)_60155	10	16	7	0	5	10	2	2	19	1	4	0	6	2
Arc;_Crenarchaeota;_Soil_crenarchaeotic_group(scg)_6082	0	0	0	0	0	1	0	0	0	0	0	0	0	0
Arc;_Crenarchaeota;_Soil_crenarchaeotic_group(scg)_67542	6	0	0	0	1	0	0	7	19	1	0	0	0	1
Arc;_Crenarchaeota;_Soil_crenarchaeotic_group(scg)_70344	0	0	0	0	3	0	0	0	7	0	0	0	0	0
Arc;_Crenarchaeota;_Soil_crenarchaeotic_group(scg)_71957	5	0	0	0	0	0	0	36	14	0	0	0	6	0
Arc;_Crenarchaeota;_Soil_crenarchaeotic_group(scg)_82305	0	0	0	0	0	0	0	0	1	0	0	0	0	0
Arc;_Crenarchaeota;_Soil_crenarchaeotic_group(scg)_94470	2	17	11	2	3	1	1	12	8	0	0	0	1	4
Arc;_Crenarchaeota;_Soil_crenarchaeotic_group(scg)_None1024	14	0	0	0	0	0	2	17	2	0	4	3	1	0
Arc;_Crenarchaeota;_Soil_crenarchaeotic_group(scg)_None1043	0	3	4	0	0	3	0	0	11	0	0	0	0	2
Arc;_Crenarchaeota;_Soil_crenarchaeotic_group(scg)_None1069	0	0	0	0	0	0	0	1	1	0	0	0	1	0
Arc;_Crenarchaeota;_Soil_crenarchaeotic_group(scg)_None1197	0	0	0	0	0	0	0	1	0	0	0	0	0	0
Arc;_Crenarchaeota;_Soil_crenarchaeotic_group(scg)_None1285	0	0	0	1	0	0	0	2	2	0	1	0	0	0
Arc;_Crenarchaeota;_Soil_crenarchaeotic_group(scg)_None1290	8	0	0	0	0	0	0	0	0	0	0	0	0	0
Arc;_Crenarchaeota;_Soil_crenarchaeotic_group(scg)_None1355	1	0	0	0	0	0	1	7	1	0	0	0	0	0
Arc;_Crenarchaeota;_Soil_crenarchaeotic_group(scg)_None1368	1	8	9	3	2	1	0	0	6	0	0	0	1	2
Arc;_Crenarchaeota;_Soil_crenarchaeotic_group(scg)_None1575	7	2	11	0	2	2	1	11	9	2	0	1	5	0
Arc;_Crenarchaeota;_Soil_crenarchaeotic_group(scg)_None1815	0	1	0	0	0	0	0	0	0	0	0	0	0	0
Arc;_Crenarchaeota;_Soil_crenarchaeotic_group(scg)_None219	5	0	0	0	0	0	0	0	2	0	0	0	1	0
Arc;_Crenarchaeota;_Soil_crenarchaeotic_group(scg)_None2274	0	1	0	0	0	0	0	0	0	0	0	0	0	0
Arc;_Crenarchaeota;_Soil_crenarchaeotic_group(scg)_None2597	1	0	0	0	0	0	0	1	0	0	0	0	0	0
Arc;_Crenarchaeota;_Soil_crenarchaeotic_group(scg)_None2778	2	0	0	0	1	0	0	7	10	2	0	1	3	0
Arc;_Crenarchaeota;_Soil_crenarchaeotic_group(scg)_None2807	8	1	1	0	2	4	5	27	47	5	0	1	14	2
Arc;_Crenarchaeota;_Soil_crenarchaeotic_group(scg)_None2843	0	1	0	0	0	0	0	0	0	0	0	0	0	3
Arc;_Crenarchaeota;_Soil_crenarchaeotic_group(scg)_None2881	0	0	0	0	0	1	0	0	0	0	0	0	0	0
Arc;_Crenarchaeota;_Soil_crenarchaeotic_group(scg)_None3333	1	0	0	0	0	0	0	0	2	0	0	0	0	0
Arc;_Crenarchaeota;_Soil_crenarchaeotic_group(scg)_None3336	0	0	0	1	0	0	0	0	1	0	0	0	0	0
Arc;_Crenarchaeota;_Soil_crenarchaeotic_group(scg)_None3355	0	3	4	0	2	0	0	0	2	1	0	0	1	0
Arc;_Crenarchaeota;_Soil_crenarchaeotic_group(scg)_None343	2	1	1	0	3	1	2	16	17	0	1	2	5	5
Arc;_Crenarchaeota;_Soil_crenarchaeotic_group(scg)_None3541	1	0	0	0	0	0	0	2	0	0	1	0	1	0
Arc;_Crenarchaeota;_Soil_crenarchaeotic_group(scg)_None3953	3	0	0	0	0	0	0	1	1	0	0	0	2	0
Arc;_Crenarchaeota;_Soil_crenarchaeotic_group(scg)_None3967	8	0	0	0	0	0	3	71	17	0	6	1	8	0
Arc;_Crenarchaeota;_Soil_crenarchaeotic_group(scg)_None4355	0	0	0	0	0	0	1	8	2	0	1	0	0	1
Arc;_Crenarchaeota;_Soil_crenarchaeotic_group(scg)_None4379	3	2	2	0	0	0	0	3	9	0	0	0	1	0
Arc;_Crenarchaeota;_Soil_crenarchaeotic_group(scg)_None4635	6	7	5	0	1	4	1	1	4	0	0	0	0	0
Arc;_Crenarchaeota;_Soil_crenarchaeotic_group(scg)_None4698	0	0	0	0	0	0	0	1	0	0	0	0	0	0
Arc;_Crenarchaeota;_Soil_crenarchaeotic_group(scg)_None4726	0	5	6	2	4	6	0	5	16	0	0	0	2	1
Arc;_Crenarchaeota;_Soil_crenarchaeotic_group(scg)_None4779	1	0	1	0	0	0	0	0	1	0	0	0	0	0
Arc;_Crenarchaeota;_Soil_crenarchaeotic_group(scg)_None4795	2	2	1	1	0	0	0	3	0	0	0	0	0	0
Arc;_Crenarchaeota;_Soil_crenarchaeotic_group(scg)_None4815	1	2	2	0	0	0	0	4	4	1	1	0	0	0
Arc;_Crenarchaeota;_Soil_crenarchaeotic_group(scg)_None5277	6	0	1	0	0	0	3	16	9	0	5	9	5	1
Arc;_Crenarchaeota;_Soil_crenarchaeotic_group(scg)_None5282	1	0	0	0	0	0	0	0	0	0	0	0	0	0
Arc;_Crenarchaeota;_Soil_crenarchaeotic_group(scg)_None540	1	0	0	0	0	1	0	4	29	1	0	1	7	1
Arc;_Crenarchaeota;_Soil_crenarchaeotic_group(scg)_None56	0	0	0	0	0	0	0	4	0	0	2	0	0	0
Arc;_Crenarchaeota;_Soil_crenarchaeotic_group(scg)_None581	5	0	0	0	0	0	1	7	2	0	1	2	0	0
Arc;_Crenarchaeota;_Soil_crenarchaeotic_group(scg)_None5821	6	3	0	0	2	0	0	5	10	0	1	0	1	1
Arc;_Crenarchaeota;_Soil_crenarchaeotic_group(scg)_None593	1	0	0	0	0	0	3	40	10	0	8	0	5	0
Arc;_Crenarchaeota;_Soil_crenarchaeotic_group(scg)_None6023	0	0	1	0	0	0	0	0	0	0	0	0	0	0
Arc;_Crenarchaeota;_Soil_crenarchaeotic_group(scg)_None6152	0	0	2	0	0	0	0	0	0	0	0	0	0	0
Arc;_Crenarchaeota;_Soil_crenarchaeotic_group(scg)_None6533	0	0	0	0	0	0	0	0	1	0	0	0	0	0
Arc;_Crenarchaeota;_Soil_crenarchaeotic_group(scg)_None6552	0	0	0	0	0	0	0	1	1	0	1	0	0	0
Arc;_Crenarchaeota;_Soil_crenarchaeotic_group(scg)_None6578	5	0	0	0	0	5	11	40	49	2	0	7	17	2
Arc;_Crenarchaeota;_Soil_crenarchaeotic_group(scg)_None6648	9	0	0	1	0	2	0	32	10	0	1	0	5	1
Arc;_Crenarchaeota;_Soil_crenarchaeotic_group(scg)_None6836	0	0	0	0	0	0	0	0	4	0	5	2	1	0
Arc;_Crenarchaeota;_Soil_crenarchaeotic_group(scg)_None6864	0	6	0	0	0	0	0	0	0	0	0	0	0	0
Arc;_Crenarchaeota;_Soil_crenarchaeotic_group(scg)_None6953	0	0	0	0	0	0	0	0	0	0	0	1	0	0
Arc;_Crenarchaeota;_Soil_crenarchaeotic_group(scg)_None7081	2	0	0	0	0	0	0	6	0	0	1	1	0	0
Arc;_Crenarchaeota;_Soil_crenarchaeotic_group(scg)_None7431	0	0	0	0	0	0	0	0	1	0	0	0	0	0
Arc;_Crenarchaeota;_Soil_crenarchaeotic_group(scg)_None7447	1	0	0	0	1	0	0	0	0	0	0	0	1	0
Arc;_Crenarchaeota;_Soil_crenarchaeotic_group(scg)_None749	0	0	1	0	0	0	0	2	0	0	0	0	0	0
Arc;_Crenarchaeota;_Soil_crenarchaeotic_group(scg)_None7616	0	0	0	0	0	0	0	1	2	0	0	0	0	0
Arc;_Crenarchaeota;_South_african_gold_mine_gp_1(sagmcg-1);_Uncultured_archaeon;_Uncultured_archaeon_18767	11	0	1	0	7	66	8	14	14	6	0	0	16	3
Arc;_Crenarchaeota;_South_african_gold_mine_gp_1(sagmcg-1);_Uncultured_archaeon;_Uncultured_archaeon_27608	12	0	0	0	9	5	0	4	15	0	0	0	4	0
Arc;_Crenarchaeota;_South_african_gold_mine_gp_1(sagmcg-1);_Uncultured_archaeon;_Uncultured_archaeon_27765	51	11	0	0	32	125	48	59	70	15	0	0	65	17
Arc;_Crenarchaeota;_South_african_gold_mine_gp_1(sagmcg-1);_Uncultured_archaeon;_Uncultured_archaeon_30692	0	0	0	0	0	0	0	0	0	0	0	0	1	0
Arc;_Crenarchaeota;_South_african_gold_mine_gp_1(sagmcg-1);_Uncultured_archaeon;_Uncultured_archaeon_58401	0	0	0	0	0	3	0	0	0	0	0	0	1	0
Arc;_Crenarchaeota;_South_african_gold_mine_gp_1(sagmcg-1);_Uncultured_archaeon;_Uncultured_archaeon_88129	32	0	0	0	0	2	0	0	2	0	0	0	0	12
Arc;_Crenarchaeota;_South_african_gold_mine_gp_1(sagmcg-1);_Uncultured_archaeon;_Uncultured_archaeon_8842	24	0	0	0	5	10	5	7	20	4	0	0	38	5
Arc;_Crenarchaeota;_South_african_gold_mine_gp_1(sagmcg-1);_Uncultured_archaeon;_Uncultured_archaeon_None1602	1	0	0	0	0	1	1	0	0	0	0	0	1	0
Arc;_Crenarchaeota;_South_african_gold_mine_gp_1(sagmcg-1);_Uncultured_archaeon;_Uncultured_archaeon_None1942	0	0	0	0	0	0	0	1	0	0	0	0	0	0
Arc;_Crenarchaeota;_South_african_gold_mine_gp_1(sagmcg-1);_Uncultured_archaeon;_Uncultured_archaeon_None1972	5	1	0	0	0	9	16	5	1	1	1	0	7	0
Arc;_Crenarchaeota;_South_african_gold_mine_gp_1(sagmcg-1);_Uncultured_archaeon;_Uncultured_archaeon_None2397	6	1	0	0	0	24	3	3	2	3	0	0	1	1
Arc;_Crenarchaeota;_South_african_gold_mine_gp_1(sagmcg-1);_Uncultured_archaeon;_Uncultured_archaeon_None2489	0	1	1	0	0	13	1	5	0	1	0	0	0	0
Arc;_Crenarchaeota;_South_african_gold_mine_gp_1(sagmcg-1);_Uncultured_archaeon;_Uncultured_archaeon_None4798	0	0	0	0	0	1	0	0	0	0	0	0	0	0
Arc;_Crenarchaeota;_South_african_gold_mine_gp_1(sagmcg-1);_Uncultured_archaeon;_Uncultured_archaeon_None5296	4	0	0	0	4	23	2	8	20	2	0	0	10	2
Arc;_Crenarchaeota;_South_african_gold_mine_gp_1(sagmcg-1);_Uncultured_archaeon;_Uncultured_archaeon_None5421	0	0	0	0	0	1	0	2	0	0	0	0	0	0
Arc;_Crenarchaeota;_South_african_gold_mine_gp_1(sagmcg-1);_Uncultured_archaeon;_Uncultured_archaeon_None6255	0	0	0	0	0	0	0	0	0	0	0	0	0	1
Arc;_Crenarchaeota;_South_african_gold_mine_gp_1(sagmcg-1);_Uncultured_archaeon;_Uncultured_archaeon_None6556	0	0	0	0	4	9	2	1	1	1	0	0	0	0
Arc;_Crenarchaeota;_South_african_gold_mine_gp_1(sagmcg-1);_Uncultured_archaeon;_Uncultured_archaeon_None6941	0	0	0	0	0	1	0	0	0	0	0	0	0	0
Arc;_Crenarchaeota;_South_african_gold_mine_gp_1(sagmcg-1);_Uncultured_archaeon;_Uncultured_archaeon_None7007	0	0	0	0	0	1	0	1	0	0	0	0	0	0
Arc;_Crenarchaeota;_South_african_gold_mine_gp_1(sagmcg-1);_Uncultured_archaeon;_Uncultured_archaeon_None7211	1	0	0	0	1	5	0	1	0	0	0	0	0	0
Arc;_Crenarchaeota;_South_african_gold_mine_gp_1(sagmcg-1);_Uncultured_archaeon;_Uncultured_archaeon_None7302	0	0	0	0	0	8	2	2	0	0	0	0	1	0
Arc;_Crenarchaeota;_South_african_gold_mine_gp_1(sagmcg-1);_Uncultured_archaeon;_Uncultured_archaeon_None7316	0	0	0	0	0	2	0	0	0	0	0	0	0	0
Arc;_Crenarchaeota;_South_african_gold_mine_gp_1(sagmcg-1);_Uncultured_archaeon_sagma-v;_Uncultured_archaeon_sagma-v_28317	3	0	0	0	0	0	0	0	0	0	0	0	0	0
Arc;_Crenarchaeota;_South_african_gold_mine_gp_1(sagmcg-1);_Uncultured_archaeon_sagma-v;_Uncultured_archaeon_sagma-v_None5204	2	0	0	0	1	0	0	0	0	0	0	0	0	0
Arc;_Crenarchaeota;_South_african_gold_mine_gp_1(sagmcg-1);_Uncultured_archaeon_sagma-x;_Uncultured_archaeon_sagma-x_None439	0	0	0	0	1	0	0	0	0	0	0	0	0	0
Arc;_Crenarchaeota;_South_african_gold_mine_gp_1(sagmcg-1);_Uncultured_archaeon_sagma-x;_Uncultured_archaeon_sagma-x_None5948	0	0	0	0	0	0	0	0	0	0	1	0	1	0
Arc;_Crenarchaeota;_South_african_gold_mine_gp_1(sagmcg-1);_Uncultured_archaeon_sagma-x;_Uncultured_archaeon_sagma-x_None6707	2	0	0	0	1	1	0	23	2	2	11	0	6	0
Arc;_Crenarchaeota;_South_african_gold_mine_gp_1(sagmcg-1);_Uncultured_archaeon_sagma-x;_Uncultured_archaeon_sagma-x_None6947	0	0	0	0	1	0	0	1	0	0	1	0	0	0
Arc;_Crenarchaeota;_South_african_gold_mine_gp_1(sagmcg-1);_Uncultured_crenarchaeote;_Uncultured_crenarchaeote_61140	6	0	0	0	0	0	0	0	0	0	0	0	0	0
Arc;_Crenarchaeota;_South_african_gold_mine_gp_1(sagmcg-1);_Uncultured_crenarchaeote;_Uncultured_crenarchaeote_None7661	2	0	0	0	0	0	0	0	0	0	0	0	0	0
Arc;_Crenarchaeota;_South_african_gold_mine_gp_1(sagmcg-1)_112700	27	0	0	0	0	0	0	2	7	0	1	0	8	9
Arc;_Crenarchaeota;_South_african_gold_mine_gp_1(sagmcg-1)_46945	3	0	0	0	0	0	0	0	0	0	0	0	0	0
Arc;_Crenarchaeota;_South_african_gold_mine_gp_1(sagmcg-1)_80795	0	0	0	0	0	1	0	2	1	1	2	0	0	0
Arc;_Crenarchaeota;_South_african_gold_mine_gp_1(sagmcg-1)_97001	10	0	0	0	2	1	1	19	14	10	52	7	19	1
Arc;_Crenarchaeota;_South_african_gold_mine_gp_1(sagmcg-1)_None2251	0	0	0	0	0	0	0	1	0	0	0	0	0	0
Arc;_Crenarchaeota;_South_african_gold_mine_gp_1(sagmcg-1)_None239	4	0	0	0	12	3	7	59	12	41	101	6	21	0
Arc;_Crenarchaeota;_South_african_gold_mine_gp_1(sagmcg-1)_None3975	0	0	0	0	0	0	0	1	0	0	0	0	0	0
Arc;_Crenarchaeota;_South_african_gold_mine_gp_1(sagmcg-1)_None5009	7	0	0	0	4	1	1	7	7	6	14	1	12	0
Arc;_Crenarchaeota;_South_african_gold_mine_gp_1(sagmcg-1)_None5732	3	0	0	0	12	0	4	79	12	33	69	3	14	0
Arc;_Crenarchaeota;_South_african_gold_mine_gp_1(sagmcg-1)_None6280	1	0	0	0	1	0	0	15	3	5	27	4	5	0
Arc;_Crenarchaeota;_South_african_gold_mine_gp_1(sagmcg-1)_None7195	0	0	0	0	0	0	0	0	0	1	0	0	0	0
Arc;_Crenarchaeota;_South_african_gold_mine_gp_1(sagmcg-1)_None7203	1	0	0	0	1	2	0	0	0	0	0	0	0	10
Arc;_Crenarchaeota;_Terrestrial_group;_Uncultured_archaeon;_Uncultured_archaeon_106060	0	0	0	0	1	0	0	0	0	0	0	0	2	0
Arc;_Crenarchaeota;_Terrestrial_group;_Uncultured_archaeon;_Uncultured_archaeon_None2970	2	0	0	0	0	0	0	0	0	0	0	0	0	0
Arc;_Crenarchaeota;_Terrestrial_group;_Uncultured_archaeon;_Uncultured_archaeon_None3371	3	0	0	0	0	0	0	0	0	0	0	0	0	0
Arc;_Crenarchaeota;_Terrestrial_group;_Uncultured_archaeon;_Uncultured_archaeon_None4568	0	0	0	0	0	0	0	0	0	0	0	0	1	0
Arc;_Crenarchaeota;_Terrestrial_group;_Uncultured_archaeon;_Uncultured_archaeon_None4610	0	0	0	0	0	0	0	0	0	0	0	0	1	0
Arc;_Crenarchaeota;_Terrestrial_group;_Uncultured_archaeon;_Uncultured_archaeon_None4934	4	0	0	0	0	0	0	0	0	0	0	0	3	0
Arc;_Crenarchaeota;_Terrestrial_group_49590	2	0	0	0	0	0	0	0	0	0	0	0	0	0
Arc;_Crenarchaeota;_Terrestrial_group_None2936	0	0	0	0	0	0	0	0	0	0	0	0	1	2
Arc;_Crenarchaeota;_Terrestrial_group_None7323	0	0	0	0	0	0	0	0	0	0	0	0	2	0
Arc;_Crenarchaeota;_Thermoprotei;_Terrestrial_miscellaneous_gp(tmcg);_Uncultured_archaeon_31994	0	0	0	0	0	0	0	0	0	0	0	0	2	0
Arc;_Crenarchaeota;_Thermoprotei;_Terrestrial_miscellaneous_gp(tmcg);_Uncultured_archaeon_None4017	0	0	0	0	0	0	0	0	0	0	0	0	1	0
Arc;_Crenarchaeota;_Thermoprotei;_Terrestrial_miscellaneous_gp(tmcg);_Uncultured_crenarchaeote_104608	0	0	0	0	0	0	0	0	0	0	0	0	98	0
Arc;_Crenarchaeota;_Thermoprotei;_Terrestrial_miscellaneous_gp(tmcg);_Uncultured_crenarchaeote_None1019	0	0	0	0	0	0	0	0	0	0	0	0	17	0
Arc;_Crenarchaeota;_Thermoprotei;_Terrestrial_miscellaneous_gp(tmcg);_Uncultured_crenarchaeote_None2627	0	0	0	0	0	0	0	0	0	0	0	0	1	0
Arc;_Crenarchaeota;_Thermoprotei;_Terrestrial_miscellaneous_gp(tmcg);_Uncultured_crenarchaeote_None2773	0	0	0	0	0	0	0	0	0	0	0	0	3	0
Arc;_Crenarchaeota;_Thermoprotei;_Terrestrial_miscellaneous_gp(tmcg);_Uncultured_crenarchaeote_None3724	0	0	0	0	0	0	0	0	0	0	0	0	4	0
Arc;_Crenarchaeota;_Thermoprotei;_Terrestrial_miscellaneous_gp(tmcg);_Uncultured_crenarchaeote_None4814	0	0	0	0	0	0	0	0	0	0	0	0	2	0
Arc;_Crenarchaeota;_Thermoprotei;_Terrestrial_miscellaneous_gp(tmcg);_Uncultured_crenarchaeote_None4996	0	0	0	0	0	0	0	0	0	0	0	0	5	0
Arc;_Crenarchaeota;_Thermoprotei;_Terrestrial_miscellaneous_gp(tmcg);_Uncultured_crenarchaeote_None5611	0	0	0	0	0	0	0	0	0	0	0	0	1	0
Arc;_Crenarchaeota;_Thermoprotei;_Terrestrial_miscellaneous_gp(tmcg)_None1349	0	0	0	0	0	0	0	0	0	0	0	0	1	0
Arc;_Crenarchaeota;_Uncultured_archaeon_sagma-z;_Uncultured_archaeon_sagma-z;_Uncultured_archaeon_sagma-z_42141	0	0	1	0	0	0	0	0	0	0	0	0	0	0
Arc;_Crenarchaeota_9518	0	1	0	0	0	0	0	0	0	0	0	0	0	0
Arc;_Crenarchaeota_None1633	0	1	0	0	0	0	0	0	0	0	0	0	0	0
Arc;_Crenarchaeota_None2548	0	0	0	0	0	0	0	0	0	0	0	0	1	0
Arc;_Crenarchaeota_None2760	0	0	0	0	0	0	0	0	0	0	0	0	1	0
Arc;_Crenarchaeota_None3429	0	0	0	0	0	0	0	0	0	0	0	0	2	0
Arc;_Crenarchaeota_None372	0	0	0	0	0	0	0	1	0	0	0	0	1	0
Arc;_Crenarchaeota_None3827	0	0	0	0	0	0	0	0	0	0	0	0	1	0
Arc;_Crenarchaeota_None4417	1	0	0	0	0	0	0	0	0	0	0	0	0	0
Arc;_Crenarchaeota_None4564	0	0	0	0	0	0	0	1	0	0	0	0	1	0
Arc;_Crenarchaeota_None4658	1	0	0	0	2	1	0	1	3	3	0	0	0	0
Arc;_Crenarchaeota_None4951	0	0	0	0	0	0	0	0	0	0	0	0	1	0
Arc;_Crenarchaeota_None5153	0	0	0	0	0	0	0	0	0	0	0	0	0	3
Arc;_Crenarchaeota_None6184	0	0	0	0	0	0	0	0	0	0	0	0	1	0
Arc;_Crenarchaeota_None6456	1	0	2	0	0	18	2	8	1	2	0	0	1	1
Arc;_Crenarchaeota_None6900	0	0	0	0	0	0	0	0	0	0	0	0	1	0
Arc;_Crenarchaeota_None7112	0	0	0	0	0	0	0	0	0	0	0	0	1	0
Arc;_Crenarchaeota_None7159	1	0	0	0	0	0	0	1	3	0	0	0	1	0
Arc;_Crenarchaeota_None7478	0	0	0	0	1	0	0	0	0	0	0	0	0	0
Arc;_Euryarchaeota;_Halobacteria;_Halobacteriales;_Deep_sea_euryarchaeotic_group(dseg)_104181	0	0	0	0	0	0	0	0	0	0	0	0	3	0
Arc;_Euryarchaeota;_Halobacteria;_Halobacteriales;_Deep_sea_euryarchaeotic_group(dseg)_14375	0	0	0	0	1	0	0	0	5	0	0	0	0	0
Arc;_Euryarchaeota;_Halobacteria;_Halobacteriales;_Deep_sea_euryarchaeotic_group(dseg)_32613	0	0	0	0	0	0	0	0	0	0	0	0	2	0
Arc;_Euryarchaeota;_Halobacteria;_Halobacteriales;_Deep_sea_euryarchaeotic_group(dseg)_34042	0	0	0	0	6	0	0	0	0	0	0	0	0	0
Arc;_Euryarchaeota;_Halobacteria;_Halobacteriales;_Deep_sea_euryarchaeotic_group(dseg)_3745	0	0	0	0	0	0	0	0	0	0	0	0	3	0
Arc;_Euryarchaeota;_Halobacteria;_Halobacteriales;_Deep_sea_euryarchaeotic_group(dseg)_76465	0	0	0	0	1	0	0	0	0	0	0	0	2	0
Arc;_Euryarchaeota;_Halobacteria;_Halobacteriales;_Deep_sea_euryarchaeotic_group(dseg)_None1034	0	0	0	0	0	0	1	0	0	0	0	0	0	0
Arc;_Euryarchaeota;_Halobacteria;_Halobacteriales;_Deep_sea_euryarchaeotic_group(dseg)_None1142	0	0	0	0	0	0	0	0	0	0	0	0	1	0
Arc;_Euryarchaeota;_Halobacteria;_Halobacteriales;_Deep_sea_euryarchaeotic_group(dseg)_None1208	0	1	0	0	0	0	0	0	0	0	0	0	0	0
Arc;_Euryarchaeota;_Halobacteria;_Halobacteriales;_Deep_sea_euryarchaeotic_group(dseg)_None1234	0	0	0	0	0	0	0	0	0	0	0	0	1	0
Arc;_Euryarchaeota;_Halobacteria;_Halobacteriales;_Deep_sea_euryarchaeotic_group(dseg)_None1337	0	0	0	0	1	0	0	0	0	0	0	0	0	0
Arc;_Euryarchaeota;_Halobacteria;_Halobacteriales;_Deep_sea_euryarchaeotic_group(dseg)_None1340	0	0	0	0	0	0	4	0	0	0	0	0	0	0
Arc;_Euryarchaeota;_Halobacteria;_Halobacteriales;_Deep_sea_euryarchaeotic_group(dseg)_None1372	1	0	0	0	0	0	0	0	0	0	0	0	2	0
Arc;_Euryarchaeota;_Halobacteria;_Halobacteriales;_Deep_sea_euryarchaeotic_group(dseg)_None1438	0	0	0	0	0	0	0	0	0	0	0	0	2	0
Arc;_Euryarchaeota;_Halobacteria;_Halobacteriales;_Deep_sea_euryarchaeotic_group(dseg)_None1639	0	0	0	0	0	0	0	0	0	0	0	0	2	0
Arc;_Euryarchaeota;_Halobacteria;_Halobacteriales;_Deep_sea_euryarchaeotic_group(dseg)_None167	0	0	0	0	0	0	0	3	0	0	0	0	0	0
Arc;_Euryarchaeota;_Halobacteria;_Halobacteriales;_Deep_sea_euryarchaeotic_group(dseg)_None1740	0	0	0	0	0	0	0	0	0	0	0	0	7	0
Arc;_Euryarchaeota;_Halobacteria;_Halobacteriales;_Deep_sea_euryarchaeotic_group(dseg)_None1801	2	0	0	0	1	0	0	0	0	0	0	0	0	0
Arc;_Euryarchaeota;_Halobacteria;_Halobacteriales;_Deep_sea_euryarchaeotic_group(dseg)_None2009	0	0	0	0	0	1	1	2	0	0	0	0	0	0
Arc;_Euryarchaeota;_Halobacteria;_Halobacteriales;_Deep_sea_euryarchaeotic_group(dseg)_None2030	0	0	0	0	1	0	0	0	0	0	0	0	2	0
Arc;_Euryarchaeota;_Halobacteria;_Halobacteriales;_Deep_sea_euryarchaeotic_group(dseg)_None2070	0	0	0	0	0	15	0	3	0	0	0	0	0	0
Arc;_Euryarchaeota;_Halobacteria;_Halobacteriales;_Deep_sea_euryarchaeotic_group(dseg)_None2211	0	0	0	0	0	0	1	5	3	9	1	0	1	0
Arc;_Euryarchaeota;_Halobacteria;_Halobacteriales;_Deep_sea_euryarchaeotic_group(dseg)_None2215	0	5	3	8	0	0	0	0	4	0	0	0	1	0
Arc;_Euryarchaeota;_Halobacteria;_Halobacteriales;_Deep_sea_euryarchaeotic_group(dseg)_None2357	0	0	0	0	1	0	0	0	0	0	0	0	0	0
Arc;_Euryarchaeota;_Halobacteria;_Halobacteriales;_Deep_sea_euryarchaeotic_group(dseg)_None2396	1	0	0	0	0	0	0	0	0	0	0	0	0	0
Arc;_Euryarchaeota;_Halobacteria;_Halobacteriales;_Deep_sea_euryarchaeotic_group(dseg)_None2476	0	1	0	0	1	0	0	0	0	0	0	0	0	0
Arc;_Euryarchaeota;_Halobacteria;_Halobacteriales;_Deep_sea_euryarchaeotic_group(dseg)_None2513	0	0	0	0	0	0	0	2	0	0	0	0	0	0
Arc;_Euryarchaeota;_Halobacteria;_Halobacteriales;_Deep_sea_euryarchaeotic_group(dseg)_None2554	0	0	0	0	0	0	0	0	0	0	0	0	1	0
Arc;_Euryarchaeota;_Halobacteria;_Halobacteriales;_Deep_sea_euryarchaeotic_group(dseg)_None2618	0	0	0	0	1	0	0	0	1	0	0	1	0	0
Arc;_Euryarchaeota;_Halobacteria;_Halobacteriales;_Deep_sea_euryarchaeotic_group(dseg)_None2641	0	0	0	0	0	0	0	0	0	0	0	0	1	0
Arc;_Euryarchaeota;_Halobacteria;_Halobacteriales;_Deep_sea_euryarchaeotic_group(dseg)_None265	0	0	0	0	0	0	0	0	0	0	0	0	1	0
Arc;_Euryarchaeota;_Halobacteria;_Halobacteriales;_Deep_sea_euryarchaeotic_group(dseg)_None2702	0	0	0	0	3	0	0	0	0	0	0	0	0	0
Arc;_Euryarchaeota;_Halobacteria;_Halobacteriales;_Deep_sea_euryarchaeotic_group(dseg)_None2790	1	0	0	0	0	0	0	0	0	0	0	0	0	0
Arc;_Euryarchaeota;_Halobacteria;_Halobacteriales;_Deep_sea_euryarchaeotic_group(dseg)_None2816	0	0	0	0	0	0	0	0	1	0	0	0	0	0
Arc;_Euryarchaeota;_Halobacteria;_Halobacteriales;_Deep_sea_euryarchaeotic_group(dseg)_None2833	0	0	0	0	0	0	0	0	1	0	0	0	2	0
Arc;_Euryarchaeota;_Halobacteria;_Halobacteriales;_Deep_sea_euryarchaeotic_group(dseg)_None2842	0	2	0	0	0	0	0	1	0	0	0	0	0	0
Arc;_Euryarchaeota;_Halobacteria;_Halobacteriales;_Deep_sea_euryarchaeotic_group(dseg)_None2898	0	0	0	0	0	0	0	2	0	0	0	0	0	0
Arc;_Euryarchaeota;_Halobacteria;_Halobacteriales;_Deep_sea_euryarchaeotic_group(dseg)_None2987	0	0	0	0	1	0	0	0	0	0	0	0	0	0
Arc;_Euryarchaeota;_Halobacteria;_Halobacteriales;_Deep_sea_euryarchaeotic_group(dseg)_None3042	0	2	0	0	0	0	0	0	0	0	0	0	0	0
Arc;_Euryarchaeota;_Halobacteria;_Halobacteriales;_Deep_sea_euryarchaeotic_group(dseg)_None3083	1	0	0	0	0	0	0	0	2	0	0	0	0	0
Arc;_Euryarchaeota;_Halobacteria;_Halobacteriales;_Deep_sea_euryarchaeotic_group(dseg)_None3136	4	0	0	0	0	0	0	0	0	0	0	0	0	0
Arc;_Euryarchaeota;_Halobacteria;_Halobacteriales;_Deep_sea_euryarchaeotic_group(dseg)_None3170	0	1	0	0	4	0	0	0	0	0	0	0	0	0
Arc;_Euryarchaeota;_Halobacteria;_Halobacteriales;_Deep_sea_euryarchaeotic_group(dseg)_None3438	0	0	0	0	0	0	0	0	0	0	0	0	1	0
Arc;_Euryarchaeota;_Halobacteria;_Halobacteriales;_Deep_sea_euryarchaeotic_group(dseg)_None3548	0	0	0	0	0	0	0	0	1	0	0	0	0	0
Arc;_Euryarchaeota;_Halobacteria;_Halobacteriales;_Deep_sea_euryarchaeotic_group(dseg)_None3561	0	0	0	0	2	0	0	0	0	0	0	0	2	0
Arc;_Euryarchaeota;_Halobacteria;_Halobacteriales;_Deep_sea_euryarchaeotic_group(dseg)_None3582	0	1	0	0	0	0	0	0	0	0	0	0	0	0
Arc;_Euryarchaeota;_Halobacteria;_Halobacteriales;_Deep_sea_euryarchaeotic_group(dseg)_None3604	0	0	0	1	0	0	0	0	5	0	0	3	1	0
Arc;_Euryarchaeota;_Halobacteria;_Halobacteriales;_Deep_sea_euryarchaeotic_group(dseg)_None364	0	0	0	0	0	0	0	3	4	0	0	0	1	0
Arc;_Euryarchaeota;_Halobacteria;_Halobacteriales;_Deep_sea_euryarchaeotic_group(dseg)_None3800	0	0	0	0	0	0	0	0	0	0	0	0	2	0
Arc;_Euryarchaeota;_Halobacteria;_Halobacteriales;_Deep_sea_euryarchaeotic_group(dseg)_None3862	0	0	0	0	0	0	0	0	0	1	0	0	0	0
Arc;_Euryarchaeota;_Halobacteria;_Halobacteriales;_Deep_sea_euryarchaeotic_group(dseg)_None3868	0	0	0	0	0	1	0	0	0	1	0	0	0	0
Arc;_Euryarchaeota;_Halobacteria;_Halobacteriales;_Deep_sea_euryarchaeotic_group(dseg)_None3923	0	0	0	0	0	0	0	0	0	0	0	0	2	0
Arc;_Euryarchaeota;_Halobacteria;_Halobacteriales;_Deep_sea_euryarchaeotic_group(dseg)_None3994	0	0	0	0	0	0	0	0	0	0	0	0	1	0
Arc;_Euryarchaeota;_Halobacteria;_Halobacteriales;_Deep_sea_euryarchaeotic_group(dseg)_None4110	0	0	0	0	0	0	0	0	0	0	0	0	1	0
Arc;_Euryarchaeota;_Halobacteria;_Halobacteriales;_Deep_sea_euryarchaeotic_group(dseg)_None4236	0	0	0	0	0	0	0	0	8	0	0	0	13	0
Arc;_Euryarchaeota;_Halobacteria;_Halobacteriales;_Deep_sea_euryarchaeotic_group(dseg)_None4263	0	0	0	1	0	0	0	0	0	0	0	0	4	0
Arc;_Euryarchaeota;_Halobacteria;_Halobacteriales;_Deep_sea_euryarchaeotic_group(dseg)_None4294	0	1	0	0	0	0	0	0	0	0	0	0	3	0
Arc;_Euryarchaeota;_Halobacteria;_Halobacteriales;_Deep_sea_euryarchaeotic_group(dseg)_None4302	0	1	0	0	0	0	0	0	1	0	0	0	0	0
Arc;_Euryarchaeota;_Halobacteria;_Halobacteriales;_Deep_sea_euryarchaeotic_group(dseg)_None4318	0	0	0	0	0	0	0	0	0	0	0	0	1	0
Arc;_Euryarchaeota;_Halobacteria;_Halobacteriales;_Deep_sea_euryarchaeotic_group(dseg)_None436	0	3	0	0	0	0	0	0	0	0	0	0	0	0
Arc;_Euryarchaeota;_Halobacteria;_Halobacteriales;_Deep_sea_euryarchaeotic_group(dseg)_None4418	2	0	0	0	0	0	0	2	0	0	0	0	0	0
Arc;_Euryarchaeota;_Halobacteria;_Halobacteriales;_Deep_sea_euryarchaeotic_group(dseg)_None4528	0	0	0	0	0	0	0	0	2	0	0	0	0	0
Arc;_Euryarchaeota;_Halobacteria;_Halobacteriales;_Deep_sea_euryarchaeotic_group(dseg)_None4553	0	0	0	0	0	0	0	0	1	0	0	0	0	0
Arc;_Euryarchaeota;_Halobacteria;_Halobacteriales;_Deep_sea_euryarchaeotic_group(dseg)_None4615	4	0	0	0	0	0	0	0	0	0	0	0	0	0
Arc;_Euryarchaeota;_Halobacteria;_Halobacteriales;_Deep_sea_euryarchaeotic_group(dseg)_None4651	0	0	0	0	0	0	0	1	0	0	0	0	0	0
Arc;_Euryarchaeota;_Halobacteria;_Halobacteriales;_Deep_sea_euryarchaeotic_group(dseg)_None4654	0	0	0	0	0	0	0	0	0	0	0	0	1	0
Arc;_Euryarchaeota;_Halobacteria;_Halobacteriales;_Deep_sea_euryarchaeotic_group(dseg)_None4807	0	0	0	0	0	0	0	0	0	0	0	0	1	0
Arc;_Euryarchaeota;_Halobacteria;_Halobacteriales;_Deep_sea_euryarchaeotic_group(dseg)_None4948	0	0	0	0	6	0	0	0	0	0	0	0	0	0
Arc;_Euryarchaeota;_Halobacteria;_Halobacteriales;_Deep_sea_euryarchaeotic_group(dseg)_None4968	0	0	0	0	0	0	0	0	0	0	0	0	7	0
Arc;_Euryarchaeota;_Halobacteria;_Halobacteriales;_Deep_sea_euryarchaeotic_group(dseg)_None4988	0	1	0	0	0	0	0	0	0	0	0	0	0	0
Arc;_Euryarchaeota;_Halobacteria;_Halobacteriales;_Deep_sea_euryarchaeotic_group(dseg)_None5124	0	2	0	0	0	0	0	0	0	0	0	0	0	0
Arc;_Euryarchaeota;_Halobacteria;_Halobacteriales;_Deep_sea_euryarchaeotic_group(dseg)_None5233	0	0	0	0	0	0	0	0	0	0	1	0	0	0
Arc;_Euryarchaeota;_Halobacteria;_Halobacteriales;_Deep_sea_euryarchaeotic_group(dseg)_None5430	2	3	0	0	0	16	1	5	0	1	0	0	0	0
Arc;_Euryarchaeota;_Halobacteria;_Halobacteriales;_Deep_sea_euryarchaeotic_group(dseg)_None5585	0	0	0	0	0	0	0	0	1	0	0	0	4	0
Arc;_Euryarchaeota;_Halobacteria;_Halobacteriales;_Deep_sea_euryarchaeotic_group(dseg)_None5624	0	0	0	0	0	0	0	0	0	0	0	0	2	0
Arc;_Euryarchaeota;_Halobacteria;_Halobacteriales;_Deep_sea_euryarchaeotic_group(dseg)_None5633	0	0	0	0	0	0	0	0	0	4	0	0	2	0
Arc;_Euryarchaeota;_Halobacteria;_Halobacteriales;_Deep_sea_euryarchaeotic_group(dseg)_None5731	0	0	0	0	0	0	0	0	0	0	0	0	1	0
Arc;_Euryarchaeota;_Halobacteria;_Halobacteriales;_Deep_sea_euryarchaeotic_group(dseg)_None5858	0	0	0	0	0	4	0	0	7	0	0	0	0	0
Arc;_Euryarchaeota;_Halobacteria;_Halobacteriales;_Deep_sea_euryarchaeotic_group(dseg)_None5882	0	1	0	0	0	3	0	1	3	0	0	0	2	0
Arc;_Euryarchaeota;_Halobacteria;_Halobacteriales;_Deep_sea_euryarchaeotic_group(dseg)_None5933	0	0	0	0	0	0	0	0	0	0	0	0	1	0
Arc;_Euryarchaeota;_Halobacteria;_Halobacteriales;_Deep_sea_euryarchaeotic_group(dseg)_None5950	0	0	0	0	0	0	0	0	0	0	0	0	1	0
Arc;_Euryarchaeota;_Halobacteria;_Halobacteriales;_Deep_sea_euryarchaeotic_group(dseg)_None5953	3	0	0	0	0	0	0	0	0	0	0	0	0	0
Arc;_Euryarchaeota;_Halobacteria;_Halobacteriales;_Deep_sea_euryarchaeotic_group(dseg)_None6018	2	0	0	0	0	0	0	0	0	0	0	0	0	0
Arc;_Euryarchaeota;_Halobacteria;_Halobacteriales;_Deep_sea_euryarchaeotic_group(dseg)_None6265	0	0	0	0	0	2	0	0	0	0	0	0	0	0
Arc;_Euryarchaeota;_Halobacteria;_Halobacteriales;_Deep_sea_euryarchaeotic_group(dseg)_None642	0	0	0	0	0	0	0	0	0	0	0	0	13	0
Arc;_Euryarchaeota;_Halobacteria;_Halobacteriales;_Deep_sea_euryarchaeotic_group(dseg)_None6450	0	0	0	0	0	0	0	0	0	0	0	0	5	0
Arc;_Euryarchaeota;_Halobacteria;_Halobacteriales;_Deep_sea_euryarchaeotic_group(dseg)_None65	0	0	0	0	0	0	0	1	0	0	0	0	0	0
Arc;_Euryarchaeota;_Halobacteria;_Halobacteriales;_Deep_sea_euryarchaeotic_group(dseg)_None6537	0	1	0	0	0	0	0	0	0	0	0	0	0	0
Arc;_Euryarchaeota;_Halobacteria;_Halobacteriales;_Deep_sea_euryarchaeotic_group(dseg)_None6564	0	12	0	5	0	3	7	0	0	0	0	0	0	0
Arc;_Euryarchaeota;_Halobacteria;_Halobacteriales;_Deep_sea_euryarchaeotic_group(dseg)_None6574	0	1	0	0	0	0	0	0	0	0	0	0	0	0
Arc;_Euryarchaeota;_Halobacteria;_Halobacteriales;_Deep_sea_euryarchaeotic_group(dseg)_None6635	0	0	0	0	1	0	0	0	0	0	0	0	0	0
Arc;_Euryarchaeota;_Halobacteria;_Halobacteriales;_Deep_sea_euryarchaeotic_group(dseg)_None6695	0	0	0	0	0	0	0	0	0	3	0	0	0	0
Arc;_Euryarchaeota;_Halobacteria;_Halobacteriales;_Deep_sea_euryarchaeotic_group(dseg)_None6725	2	0	0	0	0	0	0	0	0	0	0	0	0	0
Arc;_Euryarchaeota;_Halobacteria;_Halobacteriales;_Deep_sea_euryarchaeotic_group(dseg)_None689	0	0	0	0	0	2	0	0	0	0	0	0	0	0
Arc;_Euryarchaeota;_Halobacteria;_Halobacteriales;_Deep_sea_euryarchaeotic_group(dseg)_None697	0	0	0	0	0	1	0	0	0	0	0	0	1	0
Arc;_Euryarchaeota;_Halobacteria;_Halobacteriales;_Deep_sea_euryarchaeotic_group(dseg)_None7085	0	0	0	0	0	0	0	0	0	0	0	0	1	0
Arc;_Euryarchaeota;_Halobacteria;_Halobacteriales;_Deep_sea_euryarchaeotic_group(dseg)_None7196	0	0	0	0	0	0	0	0	1	0	0	0	0	0
Arc;_Euryarchaeota;_Halobacteria;_Halobacteriales;_Deep_sea_euryarchaeotic_group(dseg)_None7373	0	0	0	0	0	0	0	0	0	0	0	0	3	0
Arc;_Euryarchaeota;_Halobacteria;_Halobacteriales;_Deep_sea_euryarchaeotic_group(dseg)_None741	0	0	0	0	0	0	0	0	2	0	0	0	0	0
Arc;_Euryarchaeota;_Halobacteria;_Halobacteriales;_Deep_sea_euryarchaeotic_group(dseg)_None743	0	0	0	0	1	0	0	0	0	0	0	0	0	0
Arc;_Euryarchaeota;_Halobacteria;_Halobacteriales;_Deep_sea_euryarchaeotic_group(dseg)_None7437	0	0	0	0	0	2	0	0	0	0	0	0	1	0
Arc;_Euryarchaeota;_Halobacteria;_Halobacteriales;_Deep_sea_euryarchaeotic_group(dseg)_None7452	0	0	0	0	0	0	0	0	0	0	0	0	1	0
Arc;_Euryarchaeota;_Halobacteria;_Halobacteriales;_Deep_sea_euryarchaeotic_group(dseg)_None7521	1	0	0	0	0	0	0	0	0	0	0	0	0	0
Arc;_Euryarchaeota;_Halobacteria;_Halobacteriales;_Deep_sea_euryarchaeotic_group(dseg)_None7549	0	2	0	0	0	1	0	0	14	0	0	0	5	0
Arc;_Euryarchaeota;_Halobacteria;_Halobacteriales;_Deep_sea_euryarchaeotic_group(dseg)_None755	0	0	0	0	0	4	0	1	0	0	0	0	1	0
Arc;_Euryarchaeota;_Halobacteria;_Halobacteriales;_Deep_sea_euryarchaeotic_group(dseg)_None955	0	0	0	0	0	0	0	2	0	0	0	0	0	0
Arc;_Euryarchaeota;_Halobacteria;_Halobacteriales;_Deep_sea_euryarchaeotic_group(dseg)_None964	0	2	0	0	0	2	0	0	0	0	0	0	0	0
Arc;_Euryarchaeota;_Halobacteria;_Halobacteriales;_Deep_sea_hydrothermal_vent_gp_6(dhveg-6)_106636	2	0	0	0	0	0	0	0	0	0	0	0	0	0
Arc;_Euryarchaeota;_Halobacteria;_Halobacteriales;_Deep_sea_hydrothermal_vent_gp_6(dhveg-6)_109418	0	0	0	0	1	1	0	0	4	0	0	0	17	0
Arc;_Euryarchaeota;_Halobacteria;_Halobacteriales;_Deep_sea_hydrothermal_vent_gp_6(dhveg-6)_112868	0	0	0	0	0	0	0	0	0	1	0	0	0	0
Arc;_Euryarchaeota;_Halobacteria;_Halobacteriales;_Deep_sea_hydrothermal_vent_gp_6(dhveg-6)_113551	5	11	0	5	31	2	0	2	17	4	0	0	45	0
Arc;_Euryarchaeota;_Halobacteria;_Halobacteriales;_Deep_sea_hydrothermal_vent_gp_6(dhveg-6)_1376	0	6	0	0	2	0	0	0	7	0	0	0	19	0
Arc;_Euryarchaeota;_Halobacteria;_Halobacteriales;_Deep_sea_hydrothermal_vent_gp_6(dhveg-6)_16646	0	0	0	0	0	0	0	0	3	0	0	0	0	0
Arc;_Euryarchaeota;_Halobacteria;_Halobacteriales;_Deep_sea_hydrothermal_vent_gp_6(dhveg-6)_1683	0	0	0	0	0	1	1	3	1	0	0	1	1	1
Arc;_Euryarchaeota;_Halobacteria;_Halobacteriales;_Deep_sea_hydrothermal_vent_gp_6(dhveg-6)_22578	3	1	19	0	6	4	6	48	10	28	24	0	1	0
Arc;_Euryarchaeota;_Halobacteria;_Halobacteriales;_Deep_sea_hydrothermal_vent_gp_6(dhveg-6)_29741	0	0	0	0	0	0	0	0	0	0	0	0	32	0
Arc;_Euryarchaeota;_Halobacteria;_Halobacteriales;_Deep_sea_hydrothermal_vent_gp_6(dhveg-6)_29806	2	0	4	4	0	0	23	45	6	0	0	6	4	0
Arc;_Euryarchaeota;_Halobacteria;_Halobacteriales;_Deep_sea_hydrothermal_vent_gp_6(dhveg-6)_30438	1	2	0	0	4	2	0	4	0	0	0	0	4	0
Arc;_Euryarchaeota;_Halobacteria;_Halobacteriales;_Deep_sea_hydrothermal_vent_gp_6(dhveg-6)_32255	0	2	0	0	3	0	0	0	20	0	0	0	113	0
Arc;_Euryarchaeota;_Halobacteria;_Halobacteriales;_Deep_sea_hydrothermal_vent_gp_6(dhveg-6)_32734	2	1	1	6	1	3	26	97	21	2	3	6	3	0
Arc;_Euryarchaeota;_Halobacteria;_Halobacteriales;_Deep_sea_hydrothermal_vent_gp_6(dhveg-6)_35840	0	3	0	0	0	2	0	0	0	0	0	0	0	0
Arc;_Euryarchaeota;_Halobacteria;_Halobacteriales;_Deep_sea_hydrothermal_vent_gp_6(dhveg-6)_36185	0	0	1	0	0	2	0	3	5	1	6	18	10	0
Arc;_Euryarchaeota;_Halobacteria;_Halobacteriales;_Deep_sea_hydrothermal_vent_gp_6(dhveg-6)_36290	0	0	0	0	4	0	1	0	0	0	0	0	1	0
Arc;_Euryarchaeota;_Halobacteria;_Halobacteriales;_Deep_sea_hydrothermal_vent_gp_6(dhveg-6)_40131	0	0	0	0	0	0	0	0	4	0	0	0	0	0
Arc;_Euryarchaeota;_Halobacteria;_Halobacteriales;_Deep_sea_hydrothermal_vent_gp_6(dhveg-6)_42270	0	1	0	0	0	0	1	0	1	0	0	0	9	0
Arc;_Euryarchaeota;_Halobacteria;_Halobacteriales;_Deep_sea_hydrothermal_vent_gp_6(dhveg-6)_43359	0	5	5	0	3	21	5	0	4	1	0	0	3	0
Arc;_Euryarchaeota;_Halobacteria;_Halobacteriales;_Deep_sea_hydrothermal_vent_gp_6(dhveg-6)_43995	35	1	0	0	35	2	0	0	28	7	0	0	67	4
Arc;_Euryarchaeota;_Halobacteria;_Halobacteriales;_Deep_sea_hydrothermal_vent_gp_6(dhveg-6)_44024	0	0	0	1	0	1	0	0	5	0	0	0	1	0
Arc;_Euryarchaeota;_Halobacteria;_Halobacteriales;_Deep_sea_hydrothermal_vent_gp_6(dhveg-6)_486	13	0	0	4	17	0	0	0	13	9	0	0	6	6
Arc;_Euryarchaeota;_Halobacteria;_Halobacteriales;_Deep_sea_hydrothermal_vent_gp_6(dhveg-6)_51872	0	1	0	0	0	0	0	0	0	0	0	0	0	0
Arc;_Euryarchaeota;_Halobacteria;_Halobacteriales;_Deep_sea_hydrothermal_vent_gp_6(dhveg-6)_54214	0	0	0	0	0	0	0	0	0	0	0	0	9	0
Arc;_Euryarchaeota;_Halobacteria;_Halobacteriales;_Deep_sea_hydrothermal_vent_gp_6(dhveg-6)_57162	0	0	1	0	1	0	3	8	4	7	0	0	4	0
Arc;_Euryarchaeota;_Halobacteria;_Halobacteriales;_Deep_sea_hydrothermal_vent_gp_6(dhveg-6)_58560	0	1	11	0	0	5	17	54	11	5	4	15	2	0
Arc;_Euryarchaeota;_Halobacteria;_Halobacteriales;_Deep_sea_hydrothermal_vent_gp_6(dhveg-6)_5906	0	0	0	0	3	2	0	0	2	0	0	0	9	0
Arc;_Euryarchaeota;_Halobacteria;_Halobacteriales;_Deep_sea_hydrothermal_vent_gp_6(dhveg-6)_66350	0	1	0	0	1	1	12	26	14	4	1	9	37	2
Arc;_Euryarchaeota;_Halobacteria;_Halobacteriales;_Deep_sea_hydrothermal_vent_gp_6(dhveg-6)_67562	9	2	0	6	6	0	7	16	30	5	1	0	22	0
Arc;_Euryarchaeota;_Halobacteria;_Halobacteriales;_Deep_sea_hydrothermal_vent_gp_6(dhveg-6)_67614	0	0	0	0	0	0	0	0	0	0	0	0	3	0
Arc;_Euryarchaeota;_Halobacteria;_Halobacteriales;_Deep_sea_hydrothermal_vent_gp_6(dhveg-6)_7114	0	0	0	0	0	0	0	0	0	0	0	0	3	0
Arc;_Euryarchaeota;_Halobacteria;_Halobacteriales;_Deep_sea_hydrothermal_vent_gp_6(dhveg-6)_71433	0	5	0	0	1	4	0	7	7	0	0	5	1	0
Arc;_Euryarchaeota;_Halobacteria;_Halobacteriales;_Deep_sea_hydrothermal_vent_gp_6(dhveg-6)_72414	3	0	0	0	1	0	0	0	1	1	0	4	5	0
Arc;_Euryarchaeota;_Halobacteria;_Halobacteriales;_Deep_sea_hydrothermal_vent_gp_6(dhveg-6)_73084	0	0	0	0	8	0	0	0	4	0	0	0	1	0
Arc;_Euryarchaeota;_Halobacteria;_Halobacteriales;_Deep_sea_hydrothermal_vent_gp_6(dhveg-6)_75497	5	17	5	0	0	1	0	12	0	0	1	28	0	0
Arc;_Euryarchaeota;_Halobacteria;_Halobacteriales;_Deep_sea_hydrothermal_vent_gp_6(dhveg-6)_7564	0	0	0	0	0	2	8	75	9	1	0	3	0	1
Arc;_Euryarchaeota;_Halobacteria;_Halobacteriales;_Deep_sea_hydrothermal_vent_gp_6(dhveg-6)_83618	0	0	0	0	0	0	0	0	1	0	0	0	0	0
Arc;_Euryarchaeota;_Halobacteria;_Halobacteriales;_Deep_sea_hydrothermal_vent_gp_6(dhveg-6)_85314	0	0	0	0	0	0	0	0	0	0	0	0	2	0
Arc;_Euryarchaeota;_Halobacteria;_Halobacteriales;_Deep_sea_hydrothermal_vent_gp_6(dhveg-6)_86666	0	2	0	1	0	3	2	9	5	1	0	8	0	0
Arc;_Euryarchaeota;_Halobacteria;_Halobacteriales;_Deep_sea_hydrothermal_vent_gp_6(dhveg-6)_87387	8	40	47	17	22	1	61	44	106	5	47	203	15	5
Arc;_Euryarchaeota;_Halobacteria;_Halobacteriales;_Deep_sea_hydrothermal_vent_gp_6(dhveg-6)_90670	0	0	0	0	0	0	0	0	0	0	0	0	1	0
Arc;_Euryarchaeota;_Halobacteria;_Halobacteriales;_Deep_sea_hydrothermal_vent_gp_6(dhveg-6)_94194	1	0	1	0	4	0	0	3	6	1	0	0	24	0
Arc;_Euryarchaeota;_Halobacteria;_Halobacteriales;_Deep_sea_hydrothermal_vent_gp_6(dhveg-6)_96046	0	0	0	0	0	0	0	0	3	0	0	0	0	0
Arc;_Euryarchaeota;_Halobacteria;_Halobacteriales;_Deep_sea_hydrothermal_vent_gp_6(dhveg-6)_None1	0	0	0	0	1	0	0	0	0	0	0	0	0	0
Arc;_Euryarchaeota;_Halobacteria;_Halobacteriales;_Deep_sea_hydrothermal_vent_gp_6(dhveg-6)_None100	2	0	0	3	0	2	0	0	2	0	0	0	2	0
Arc;_Euryarchaeota;_Halobacteria;_Halobacteriales;_Deep_sea_hydrothermal_vent_gp_6(dhveg-6)_None1001	0	1	0	0	0	0	0	0	0	0	0	0	0	0
Arc;_Euryarchaeota;_Halobacteria;_Halobacteriales;_Deep_sea_hydrothermal_vent_gp_6(dhveg-6)_None1002	0	1	0	0	0	0	0	0	0	0	0	0	0	0
Arc;_Euryarchaeota;_Halobacteria;_Halobacteriales;_Deep_sea_hydrothermal_vent_gp_6(dhveg-6)_None1003	0	0	0	0	0	0	0	0	0	0	0	1	0	0
Arc;_Euryarchaeota;_Halobacteria;_Halobacteriales;_Deep_sea_hydrothermal_vent_gp_6(dhveg-6)_None1006	0	0	0	0	0	0	0	2	0	0	0	0	0	0
Arc;_Euryarchaeota;_Halobacteria;_Halobacteriales;_Deep_sea_hydrothermal_vent_gp_6(dhveg-6)_None1007	0	0	0	0	2	1	0	0	0	0	0	0	0	0
Arc;_Euryarchaeota;_Halobacteria;_Halobacteriales;_Deep_sea_hydrothermal_vent_gp_6(dhveg-6)_None1008	0	0	0	0	0	0	0	0	0	0	0	0	1	0
Arc;_Euryarchaeota;_Halobacteria;_Halobacteriales;_Deep_sea_hydrothermal_vent_gp_6(dhveg-6)_None101	0	10	0	0	8	0	0	0	0	0	0	0	0	0
Arc;_Euryarchaeota;_Halobacteria;_Halobacteriales;_Deep_sea_hydrothermal_vent_gp_6(dhveg-6)_None1014	0	0	0	0	1	0	0	0	0	0	0	0	3	0
Arc;_Euryarchaeota;_Halobacteria;_Halobacteriales;_Deep_sea_hydrothermal_vent_gp_6(dhveg-6)_None1020	1	0	0	0	1	4	0	15	2	2	0	2	5	0
Arc;_Euryarchaeota;_Halobacteria;_Halobacteriales;_Deep_sea_hydrothermal_vent_gp_6(dhveg-6)_None1021	0	0	0	0	0	1	0	4	3	0	1	0	3	0
Arc;_Euryarchaeota;_Halobacteria;_Halobacteriales;_Deep_sea_hydrothermal_vent_gp_6(dhveg-6)_None1022	0	0	0	0	0	0	0	0	3	0	0	0	0	0
Arc;_Euryarchaeota;_Halobacteria;_Halobacteriales;_Deep_sea_hydrothermal_vent_gp_6(dhveg-6)_None1023	0	0	0	0	0	0	0	0	2	0	0	0	1	0
Arc;_Euryarchaeota;_Halobacteria;_Halobacteriales;_Deep_sea_hydrothermal_vent_gp_6(dhveg-6)_None1025	0	1	0	0	0	4	0	1	0	6	1	2	0	0
Arc;_Euryarchaeota;_Halobacteria;_Halobacteriales;_Deep_sea_hydrothermal_vent_gp_6(dhveg-6)_None1027	0	2	0	6	3	1	0	1	0	0	0	0	3	0
Arc;_Euryarchaeota;_Halobacteria;_Halobacteriales;_Deep_sea_hydrothermal_vent_gp_6(dhveg-6)_None1029	0	0	0	0	0	0	0	0	0	0	0	0	4	0
Arc;_Euryarchaeota;_Halobacteria;_Halobacteriales;_Deep_sea_hydrothermal_vent_gp_6(dhveg-6)_None103	0	0	0	0	0	0	0	1	0	0	0	0	0	0
Arc;_Euryarchaeota;_Halobacteria;_Halobacteriales;_Deep_sea_hydrothermal_vent_gp_6(dhveg-6)_None1031	0	0	0	0	2	0	0	0	0	0	0	0	0	0
Arc;_Euryarchaeota;_Halobacteria;_Halobacteriales;_Deep_sea_hydrothermal_vent_gp_6(dhveg-6)_None1033	0	0	0	0	0	0	0	1	0	0	0	0	0	0
Arc;_Euryarchaeota;_Halobacteria;_Halobacteriales;_Deep_sea_hydrothermal_vent_gp_6(dhveg-6)_None1036	0	0	0	0	1	0	0	0	0	0	0	0	0	0
Arc;_Euryarchaeota;_Halobacteria;_Halobacteriales;_Deep_sea_hydrothermal_vent_gp_6(dhveg-6)_None1037	0	2	0	0	0	0	6	0	0	0	0	0	0	0
Arc;_Euryarchaeota;_Halobacteria;_Halobacteriales;_Deep_sea_hydrothermal_vent_gp_6(dhveg-6)_None1038	0	0	0	0	0	0	0	0	0	0	0	0	1	0
Arc;_Euryarchaeota;_Halobacteria;_Halobacteriales;_Deep_sea_hydrothermal_vent_gp_6(dhveg-6)_None104	0	0	1	1	0	3	0	10	0	0	1	0	0	0
Arc;_Euryarchaeota;_Halobacteria;_Halobacteriales;_Deep_sea_hydrothermal_vent_gp_6(dhveg-6)_None1041	0	0	0	0	0	0	0	0	0	0	0	0	1	0
Arc;_Euryarchaeota;_Halobacteria;_Halobacteriales;_Deep_sea_hydrothermal_vent_gp_6(dhveg-6)_None1042	0	0	0	0	0	0	0	0	0	0	0	0	3	0
Arc;_Euryarchaeota;_Halobacteria;_Halobacteriales;_Deep_sea_hydrothermal_vent_gp_6(dhveg-6)_None1044	0	3	1	0	0	2	0	1	0	0	1	0	0	0
Arc;_Euryarchaeota;_Halobacteria;_Halobacteriales;_Deep_sea_hydrothermal_vent_gp_6(dhveg-6)_None1045	0	0	0	0	0	11	4	9	0	4	0	0	0	0
Arc;_Euryarchaeota;_Halobacteria;_Halobacteriales;_Deep_sea_hydrothermal_vent_gp_6(dhveg-6)_None1046	0	0	0	0	0	0	0	1	0	0	0	0	0	0
Arc;_Euryarchaeota;_Halobacteria;_Halobacteriales;_Deep_sea_hydrothermal_vent_gp_6(dhveg-6)_None1047	0	0	0	0	0	7	0	7	64	24	0	0	13	6
Arc;_Euryarchaeota;_Halobacteria;_Halobacteriales;_Deep_sea_hydrothermal_vent_gp_6(dhveg-6)_None1048	0	0	0	0	0	0	0	0	1	0	0	0	0	0
Arc;_Euryarchaeota;_Halobacteria;_Halobacteriales;_Deep_sea_hydrothermal_vent_gp_6(dhveg-6)_None1049	0	0	0	0	0	0	0	3	0	0	2	0	0	0
Arc;_Euryarchaeota;_Halobacteria;_Halobacteriales;_Deep_sea_hydrothermal_vent_gp_6(dhveg-6)_None1051	0	2	0	0	0	0	0	0	0	0	0	0	0	0
Arc;_Euryarchaeota;_Halobacteria;_Halobacteriales;_Deep_sea_hydrothermal_vent_gp_6(dhveg-6)_None1053	0	0	0	0	0	3	0	0	0	0	0	0	1	0
Arc;_Euryarchaeota;_Halobacteria;_Halobacteriales;_Deep_sea_hydrothermal_vent_gp_6(dhveg-6)_None1054	2	0	0	0	0	0	10	8	0	0	0	0	0	0
Arc;_Euryarchaeota;_Halobacteria;_Halobacteriales;_Deep_sea_hydrothermal_vent_gp_6(dhveg-6)_None1055	0	7	4	0	3	27	56	31	14	86	40	20	12	0
Arc;_Euryarchaeota;_Halobacteria;_Halobacteriales;_Deep_sea_hydrothermal_vent_gp_6(dhveg-6)_None1056	0	0	0	0	0	0	0	0	0	0	0	1	0	0
Arc;_Euryarchaeota;_Halobacteria;_Halobacteriales;_Deep_sea_hydrothermal_vent_gp_6(dhveg-6)_None1058	2	0	0	0	0	0	0	0	0	0	0	0	0	0
Arc;_Euryarchaeota;_Halobacteria;_Halobacteriales;_Deep_sea_hydrothermal_vent_gp_6(dhveg-6)_None1059	0	0	3	0	2	0	0	6	4	3	4	4	3	0
Arc;_Euryarchaeota;_Halobacteria;_Halobacteriales;_Deep_sea_hydrothermal_vent_gp_6(dhveg-6)_None106	1	0	0	0	0	0	0	1	0	0	0	0	0	0
Arc;_Euryarchaeota;_Halobacteria;_Halobacteriales;_Deep_sea_hydrothermal_vent_gp_6(dhveg-6)_None1060	0	9	0	0	6	19	21	16	7	1	2	3	5	0
Arc;_Euryarchaeota;_Halobacteria;_Halobacteriales;_Deep_sea_hydrothermal_vent_gp_6(dhveg-6)_None1062	0	0	0	0	1	0	0	0	0	0	0	0	0	0
Arc;_Euryarchaeota;_Halobacteria;_Halobacteriales;_Deep_sea_hydrothermal_vent_gp_6(dhveg-6)_None1064	0	0	0	0	0	0	0	0	1	0	0	0	5	0
Arc;_Euryarchaeota;_Halobacteria;_Halobacteriales;_Deep_sea_hydrothermal_vent_gp_6(dhveg-6)_None1065	0	0	0	0	0	0	0	0	1	0	0	0	0	0
Arc;_Euryarchaeota;_Halobacteria;_Halobacteriales;_Deep_sea_hydrothermal_vent_gp_6(dhveg-6)_None1066	0	0	0	0	0	0	10	0	0	0	0	0	1	0
Arc;_Euryarchaeota;_Halobacteria;_Halobacteriales;_Deep_sea_hydrothermal_vent_gp_6(dhveg-6)_None1068	0	0	0	0	0	0	0	0	0	0	0	0	1	0
Arc;_Euryarchaeota;_Halobacteria;_Halobacteriales;_Deep_sea_hydrothermal_vent_gp_6(dhveg-6)_None1070	0	0	0	0	0	0	1	2	0	0	0	0	0	0
Arc;_Euryarchaeota;_Halobacteria;_Halobacteriales;_Deep_sea_hydrothermal_vent_gp_6(dhveg-6)_None1071	0	0	0	0	0	0	0	5	0	0	0	0	0	0
Arc;_Euryarchaeota;_Halobacteria;_Halobacteriales;_Deep_sea_hydrothermal_vent_gp_6(dhveg-6)_None1072	0	0	0	0	0	0	0	0	0	0	0	0	1	0
Arc;_Euryarchaeota;_Halobacteria;_Halobacteriales;_Deep_sea_hydrothermal_vent_gp_6(dhveg-6)_None1073	0	0	0	0	0	0	0	0	0	1	0	0	10	0
Arc;_Euryarchaeota;_Halobacteria;_Halobacteriales;_Deep_sea_hydrothermal_vent_gp_6(dhveg-6)_None1074	1	0	6	0	2	2	13	11	7	15	6	0	9	0
Arc;_Euryarchaeota;_Halobacteria;_Halobacteriales;_Deep_sea_hydrothermal_vent_gp_6(dhveg-6)_None1075	0	0	0	0	0	0	0	0	0	0	0	0	1	0
Arc;_Euryarchaeota;_Halobacteria;_Halobacteriales;_Deep_sea_hydrothermal_vent_gp_6(dhveg-6)_None1078	0	0	0	3	0	0	1	5	1	1	1	0	1	0
Arc;_Euryarchaeota;_Halobacteria;_Halobacteriales;_Deep_sea_hydrothermal_vent_gp_6(dhveg-6)_None108	7	0	0	0	0	22	0	0	3	1	0	0	0	0
Arc;_Euryarchaeota;_Halobacteria;_Halobacteriales;_Deep_sea_hydrothermal_vent_gp_6(dhveg-6)_None1081	0	0	0	0	0	0	0	0	0	0	0	0	2	0
Arc;_Euryarchaeota;_Halobacteria;_Halobacteriales;_Deep_sea_hydrothermal_vent_gp_6(dhveg-6)_None1082	0	0	0	0	0	0	0	0	0	1	0	0	0	0
Arc;_Euryarchaeota;_Halobacteria;_Halobacteriales;_Deep_sea_hydrothermal_vent_gp_6(dhveg-6)_None1083	0	0	2	0	0	0	0	0	0	0	0	0	0	0
Arc;_Euryarchaeota;_Halobacteria;_Halobacteriales;_Deep_sea_hydrothermal_vent_gp_6(dhveg-6)_None1086	0	0	0	0	0	0	0	0	0	0	0	0	1	0
Arc;_Euryarchaeota;_Halobacteria;_Halobacteriales;_Deep_sea_hydrothermal_vent_gp_6(dhveg-6)_None1088	0	14	0	0	3	3	12	6	26	1	0	11	19	0
Arc;_Euryarchaeota;_Halobacteria;_Halobacteriales;_Deep_sea_hydrothermal_vent_gp_6(dhveg-6)_None1090	0	0	0	0	0	2	0	3	0	0	0	0	0	0
Arc;_Euryarchaeota;_Halobacteria;_Halobacteriales;_Deep_sea_hydrothermal_vent_gp_6(dhveg-6)_None1091	3	5	1	1	3	95	64	42	3	10	6	0	3	0
Arc;_Euryarchaeota;_Halobacteria;_Halobacteriales;_Deep_sea_hydrothermal_vent_gp_6(dhveg-6)_None1094	0	0	0	0	2	1	0	0	0	0	0	0	0	0
Arc;_Euryarchaeota;_Halobacteria;_Halobacteriales;_Deep_sea_hydrothermal_vent_gp_6(dhveg-6)_None1095	0	0	0	0	0	0	0	1	0	0	0	1	0	0
Arc;_Euryarchaeota;_Halobacteria;_Halobacteriales;_Deep_sea_hydrothermal_vent_gp_6(dhveg-6)_None1096	0	0	0	0	0	0	0	0	0	0	0	0	1	0
Arc;_Euryarchaeota;_Halobacteria;_Halobacteriales;_Deep_sea_hydrothermal_vent_gp_6(dhveg-6)_None1097	0	0	0	0	0	0	0	0	0	0	0	0	1	0
Arc;_Euryarchaeota;_Halobacteria;_Halobacteriales;_Deep_sea_hydrothermal_vent_gp_6(dhveg-6)_None1099	0	1	0	0	0	2	0	7	5	0	0	8	0	0
Arc;_Euryarchaeota;_Halobacteria;_Halobacteriales;_Deep_sea_hydrothermal_vent_gp_6(dhveg-6)_None11	0	0	2	0	0	0	0	0	0	0	0	0	0	0
Arc;_Euryarchaeota;_Halobacteria;_Halobacteriales;_Deep_sea_hydrothermal_vent_gp_6(dhveg-6)_None110	0	5	0	0	0	0	0	0	0	0	0	0	0	0
Arc;_Euryarchaeota;_Halobacteria;_Halobacteriales;_Deep_sea_hydrothermal_vent_gp_6(dhveg-6)_None1100	0	0	0	0	0	0	0	0	0	0	0	0	2	0
Arc;_Euryarchaeota;_Halobacteria;_Halobacteriales;_Deep_sea_hydrothermal_vent_gp_6(dhveg-6)_None1102	0	0	0	0	0	1	0	0	0	0	0	0	0	0
Arc;_Euryarchaeota;_Halobacteria;_Halobacteriales;_Deep_sea_hydrothermal_vent_gp_6(dhveg-6)_None1103	0	6	0	1	20	2	3	0	3	3	0	0	3	0
Arc;_Euryarchaeota;_Halobacteria;_Halobacteriales;_Deep_sea_hydrothermal_vent_gp_6(dhveg-6)_None1104	0	0	0	0	2	0	0	0	0	0	0	0	0	0
Arc;_Euryarchaeota;_Halobacteria;_Halobacteriales;_Deep_sea_hydrothermal_vent_gp_6(dhveg-6)_None1108	0	0	0	0	2	0	0	0	2	0	0	0	1	0
Arc;_Euryarchaeota;_Halobacteria;_Halobacteriales;_Deep_sea_hydrothermal_vent_gp_6(dhveg-6)_None1109	0	1	0	3	0	3	7	28	10	2	5	2	12	0
Arc;_Euryarchaeota;_Halobacteria;_Halobacteriales;_Deep_sea_hydrothermal_vent_gp_6(dhveg-6)_None111	0	0	0	0	0	2	0	0	1	0	0	0	0	0
Arc;_Euryarchaeota;_Halobacteria;_Halobacteriales;_Deep_sea_hydrothermal_vent_gp_6(dhveg-6)_None1110	0	0	1	0	0	5	0	2	0	0	0	0	0	0
Arc;_Euryarchaeota;_Halobacteria;_Halobacteriales;_Deep_sea_hydrothermal_vent_gp_6(dhveg-6)_None1111	0	0	3	1	5	2	2	0	5	0	0	0	0	0
Arc;_Euryarchaeota;_Halobacteria;_Halobacteriales;_Deep_sea_hydrothermal_vent_gp_6(dhveg-6)_None1112	3	0	0	0	2	6	0	0	3	0	0	0	4	0
Arc;_Euryarchaeota;_Halobacteria;_Halobacteriales;_Deep_sea_hydrothermal_vent_gp_6(dhveg-6)_None1113	0	0	0	0	1	0	0	0	0	0	0	0	0	0
Arc;_Euryarchaeota;_Halobacteria;_Halobacteriales;_Deep_sea_hydrothermal_vent_gp_6(dhveg-6)_None1114	0	0	0	0	0	0	0	0	0	0	0	0	1	0
Arc;_Euryarchaeota;_Halobacteria;_Halobacteriales;_Deep_sea_hydrothermal_vent_gp_6(dhveg-6)_None1116	0	0	0	0	0	1	2	7	2	0	0	0	0	0
Arc;_Euryarchaeota;_Halobacteria;_Halobacteriales;_Deep_sea_hydrothermal_vent_gp_6(dhveg-6)_None1119	1	6	1	3	5	18	11	53	22	7	13	0	9	0
Arc;_Euryarchaeota;_Halobacteria;_Halobacteriales;_Deep_sea_hydrothermal_vent_gp_6(dhveg-6)_None1120	0	0	0	0	0	0	0	0	0	1	0	0	0	0
Arc;_Euryarchaeota;_Halobacteria;_Halobacteriales;_Deep_sea_hydrothermal_vent_gp_6(dhveg-6)_None1121	0	3	0	0	0	13	10	3	0	3	0	0	2	0
Arc;_Euryarchaeota;_Halobacteria;_Halobacteriales;_Deep_sea_hydrothermal_vent_gp_6(dhveg-6)_None1122	0	0	0	0	0	0	0	0	0	6	0	0	2	0
Arc;_Euryarchaeota;_Halobacteria;_Halobacteriales;_Deep_sea_hydrothermal_vent_gp_6(dhveg-6)_None1125	0	0	0	0	0	0	0	0	0	0	0	0	1	0
Arc;_Euryarchaeota;_Halobacteria;_Halobacteriales;_Deep_sea_hydrothermal_vent_gp_6(dhveg-6)_None1127	0	0	0	0	0	0	0	0	1	0	0	0	1	0
Arc;_Euryarchaeota;_Halobacteria;_Halobacteriales;_Deep_sea_hydrothermal_vent_gp_6(dhveg-6)_None1129	0	0	0	0	0	0	0	0	0	0	0	0	4	0
Arc;_Euryarchaeota;_Halobacteria;_Halobacteriales;_Deep_sea_hydrothermal_vent_gp_6(dhveg-6)_None1131	0	0	0	0	0	0	0	0	4	0	0	0	2	0
Arc;_Euryarchaeota;_Halobacteria;_Halobacteriales;_Deep_sea_hydrothermal_vent_gp_6(dhveg-6)_None1132	0	0	0	1	0	11	0	13	6	1	0	0	12	2
Arc;_Euryarchaeota;_Halobacteria;_Halobacteriales;_Deep_sea_hydrothermal_vent_gp_6(dhveg-6)_None1135	0	1	0	0	0	0	0	0	0	0	0	0	0	0
Arc;_Euryarchaeota;_Halobacteria;_Halobacteriales;_Deep_sea_hydrothermal_vent_gp_6(dhveg-6)_None1136	0	0	0	0	0	0	0	0	0	0	0	0	0	1
Arc;_Euryarchaeota;_Halobacteria;_Halobacteriales;_Deep_sea_hydrothermal_vent_gp_6(dhveg-6)_None1137	0	0	0	0	0	0	0	0	0	0	0	0	3	0
Arc;_Euryarchaeota;_Halobacteria;_Halobacteriales;_Deep_sea_hydrothermal_vent_gp_6(dhveg-6)_None1138	0	0	1	0	0	4	0	0	0	0	0	0	1	0
Arc;_Euryarchaeota;_Halobacteria;_Halobacteriales;_Deep_sea_hydrothermal_vent_gp_6(dhveg-6)_None1140	0	0	0	0	1	1	0	4	3	1	3	6	1	0
Arc;_Euryarchaeota;_Halobacteria;_Halobacteriales;_Deep_sea_hydrothermal_vent_gp_6(dhveg-6)_None1145	1	0	0	0	0	2	0	12	0	0	1	0	1	0
Arc;_Euryarchaeota;_Halobacteria;_Halobacteriales;_Deep_sea_hydrothermal_vent_gp_6(dhveg-6)_None1146	3	0	0	0	0	8	22	5	4	19	0	0	0	0
Arc;_Euryarchaeota;_Halobacteria;_Halobacteriales;_Deep_sea_hydrothermal_vent_gp_6(dhveg-6)_None1147	0	0	0	0	0	0	0	0	0	4	0	0	0	0
Arc;_Euryarchaeota;_Halobacteria;_Halobacteriales;_Deep_sea_hydrothermal_vent_gp_6(dhveg-6)_None115	5	15	20	1	3	8	59	44	80	16	12	114	50	0
Arc;_Euryarchaeota;_Halobacteria;_Halobacteriales;_Deep_sea_hydrothermal_vent_gp_6(dhveg-6)_None1152	0	0	0	0	1	1	0	0	0	0	0	0	0	0
Arc;_Euryarchaeota;_Halobacteria;_Halobacteriales;_Deep_sea_hydrothermal_vent_gp_6(dhveg-6)_None1153	0	0	0	0	0	0	0	0	0	0	0	0	5	0
Arc;_Euryarchaeota;_Halobacteria;_Halobacteriales;_Deep_sea_hydrothermal_vent_gp_6(dhveg-6)_None1156	0	0	0	0	1	0	0	2	3	0	2	0	0	0
Arc;_Euryarchaeota;_Halobacteria;_Halobacteriales;_Deep_sea_hydrothermal_vent_gp_6(dhveg-6)_None1158	0	0	7	2	0	0	3	0	2	4	0	0	1	0
Arc;_Euryarchaeota;_Halobacteria;_Halobacteriales;_Deep_sea_hydrothermal_vent_gp_6(dhveg-6)_None1160	0	0	0	0	0	0	0	0	0	0	0	0	2	1
Arc;_Euryarchaeota;_Halobacteria;_Halobacteriales;_Deep_sea_hydrothermal_vent_gp_6(dhveg-6)_None1162	0	0	0	0	0	0	0	0	1	0	0	0	0	0
Arc;_Euryarchaeota;_Halobacteria;_Halobacteriales;_Deep_sea_hydrothermal_vent_gp_6(dhveg-6)_None1163	4	2	5	2	5	6	2	75	5	20	9	22	5	3
Arc;_Euryarchaeota;_Halobacteria;_Halobacteriales;_Deep_sea_hydrothermal_vent_gp_6(dhveg-6)_None1165	0	0	0	0	0	0	0	0	0	0	0	0	9	1
Arc;_Euryarchaeota;_Halobacteria;_Halobacteriales;_Deep_sea_hydrothermal_vent_gp_6(dhveg-6)_None1167	0	0	0	0	0	0	0	2	0	0	0	0	0	0
Arc;_Euryarchaeota;_Halobacteria;_Halobacteriales;_Deep_sea_hydrothermal_vent_gp_6(dhveg-6)_None1168	0	3	0	0	1	0	0	0	0	0	0	0	1	0
Arc;_Euryarchaeota;_Halobacteria;_Halobacteriales;_Deep_sea_hydrothermal_vent_gp_6(dhveg-6)_None1169	0	0	0	0	0	0	0	1	0	0	0	0	1	0
Arc;_Euryarchaeota;_Halobacteria;_Halobacteriales;_Deep_sea_hydrothermal_vent_gp_6(dhveg-6)_None117	0	2	0	0	0	0	0	0	0	0	0	0	0	0
Arc;_Euryarchaeota;_Halobacteria;_Halobacteriales;_Deep_sea_hydrothermal_vent_gp_6(dhveg-6)_None1170	0	0	6	8	0	5	43	53	4	2	0	0	0	0
Arc;_Euryarchaeota;_Halobacteria;_Halobacteriales;_Deep_sea_hydrothermal_vent_gp_6(dhveg-6)_None1171	2	0	0	0	0	0	0	55	0	0	2	0	2	0
Arc;_Euryarchaeota;_Halobacteria;_Halobacteriales;_Deep_sea_hydrothermal_vent_gp_6(dhveg-6)_None1172	0	0	0	0	0	0	4	0	0	0	0	0	0	0
Arc;_Euryarchaeota;_Halobacteria;_Halobacteriales;_Deep_sea_hydrothermal_vent_gp_6(dhveg-6)_None1173	0	0	0	0	0	0	0	0	0	1	0	0	0	0
Arc;_Euryarchaeota;_Halobacteria;_Halobacteriales;_Deep_sea_hydrothermal_vent_gp_6(dhveg-6)_None1175	0	0	0	0	0	0	0	0	1	0	0	0	0	0
Arc;_Euryarchaeota;_Halobacteria;_Halobacteriales;_Deep_sea_hydrothermal_vent_gp_6(dhveg-6)_None1180	0	0	0	0	0	0	0	0	0	1	0	0	0	0
Arc;_Euryarchaeota;_Halobacteria;_Halobacteriales;_Deep_sea_hydrothermal_vent_gp_6(dhveg-6)_None1181	0	1	0	0	1	0	0	0	1	0	0	0	0	0
Arc;_Euryarchaeota;_Halobacteria;_Halobacteriales;_Deep_sea_hydrothermal_vent_gp_6(dhveg-6)_None1184	16	0	0	6	1	2	0	0	0	0	0	0	4	0
Arc;_Euryarchaeota;_Halobacteria;_Halobacteriales;_Deep_sea_hydrothermal_vent_gp_6(dhveg-6)_None1185	0	0	0	0	0	0	0	0	9	0	0	0	0	0
Arc;_Euryarchaeota;_Halobacteria;_Halobacteriales;_Deep_sea_hydrothermal_vent_gp_6(dhveg-6)_None1186	0	0	0	0	0	0	0	0	2	0	0	0	0	0
Arc;_Euryarchaeota;_Halobacteria;_Halobacteriales;_Deep_sea_hydrothermal_vent_gp_6(dhveg-6)_None1188	0	0	0	0	2	0	0	0	0	0	0	0	0	0
Arc;_Euryarchaeota;_Halobacteria;_Halobacteriales;_Deep_sea_hydrothermal_vent_gp_6(dhveg-6)_None1189	0	0	0	0	0	0	0	3	4	0	0	3	2	0
Arc;_Euryarchaeota;_Halobacteria;_Halobacteriales;_Deep_sea_hydrothermal_vent_gp_6(dhveg-6)_None1190	0	0	0	0	2	0	0	0	1	0	0	0	0	0
Arc;_Euryarchaeota;_Halobacteria;_Halobacteriales;_Deep_sea_hydrothermal_vent_gp_6(dhveg-6)_None1191	0	0	0	1	0	0	0	0	0	0	0	0	0	0
Arc;_Euryarchaeota;_Halobacteria;_Halobacteriales;_Deep_sea_hydrothermal_vent_gp_6(dhveg-6)_None1193	1	0	0	0	0	0	0	0	0	0	0	0	0	0
Arc;_Euryarchaeota;_Halobacteria;_Halobacteriales;_Deep_sea_hydrothermal_vent_gp_6(dhveg-6)_None1194	4	0	0	0	5	2	0	1	20	2	0	0	57	7
Arc;_Euryarchaeota;_Halobacteria;_Halobacteriales;_Deep_sea_hydrothermal_vent_gp_6(dhveg-6)_None1195	0	0	7	0	0	14	0	12	2	5	11	0	3	0
Arc;_Euryarchaeota;_Halobacteria;_Halobacteriales;_Deep_sea_hydrothermal_vent_gp_6(dhveg-6)_None1196	4	0	0	0	1	0	0	0	0	0	0	0	1	0
Arc;_Euryarchaeota;_Halobacteria;_Halobacteriales;_Deep_sea_hydrothermal_vent_gp_6(dhveg-6)_None1198	5	0	0	0	0	0	0	0	0	2	0	0	0	0
Arc;_Euryarchaeota;_Halobacteria;_Halobacteriales;_Deep_sea_hydrothermal_vent_gp_6(dhveg-6)_None1199	0	2	1	0	0	0	0	0	4	0	0	0	10	0
Arc;_Euryarchaeota;_Halobacteria;_Halobacteriales;_Deep_sea_hydrothermal_vent_gp_6(dhveg-6)_None12	0	0	0	0	0	1	0	0	0	0	0	0	0	0
Arc;_Euryarchaeota;_Halobacteria;_Halobacteriales;_Deep_sea_hydrothermal_vent_gp_6(dhveg-6)_None1202	0	2	0	0	0	0	0	0	0	0	0	0	0	0
Arc;_Euryarchaeota;_Halobacteria;_Halobacteriales;_Deep_sea_hydrothermal_vent_gp_6(dhveg-6)_None1203	0	0	0	0	0	0	0	0	7	0	0	0	4	0
Arc;_Euryarchaeota;_Halobacteria;_Halobacteriales;_Deep_sea_hydrothermal_vent_gp_6(dhveg-6)_None1204	0	0	0	0	0	0	0	0	0	0	1	0	0	0
Arc;_Euryarchaeota;_Halobacteria;_Halobacteriales;_Deep_sea_hydrothermal_vent_gp_6(dhveg-6)_None1209	0	0	0	0	0	0	0	0	0	0	0	0	2	0
Arc;_Euryarchaeota;_Halobacteria;_Halobacteriales;_Deep_sea_hydrothermal_vent_gp_6(dhveg-6)_None121	0	0	0	0	0	0	0	0	0	1	0	0	0	0
Arc;_Euryarchaeota;_Halobacteria;_Halobacteriales;_Deep_sea_hydrothermal_vent_gp_6(dhveg-6)_None1211	0	0	0	0	1	0	0	0	0	0	0	0	0	0
Arc;_Euryarchaeota;_Halobacteria;_Halobacteriales;_Deep_sea_hydrothermal_vent_gp_6(dhveg-6)_None1213	0	2	0	0	0	0	0	0	0	0	0	0	0	0
Arc;_Euryarchaeota;_Halobacteria;_Halobacteriales;_Deep_sea_hydrothermal_vent_gp_6(dhveg-6)_None1214	0	0	0	0	1	0	1	0	0	0	0	0	0	0
Arc;_Euryarchaeota;_Halobacteria;_Halobacteriales;_Deep_sea_hydrothermal_vent_gp_6(dhveg-6)_None1216	0	0	0	0	1	1	4	20	5	0	1	0	1	0
Arc;_Euryarchaeota;_Halobacteria;_Halobacteriales;_Deep_sea_hydrothermal_vent_gp_6(dhveg-6)_None122	0	4	0	0	8	1	0	1	12	2	0	0	66	0
Arc;_Euryarchaeota;_Halobacteria;_Halobacteriales;_Deep_sea_hydrothermal_vent_gp_6(dhveg-6)_None1220	0	0	0	0	0	1	2	4	2	2	0	0	1	0
Arc;_Euryarchaeota;_Halobacteria;_Halobacteriales;_Deep_sea_hydrothermal_vent_gp_6(dhveg-6)_None1221	0	0	0	0	0	0	0	0	1	0	0	0	5	0
Arc;_Euryarchaeota;_Halobacteria;_Halobacteriales;_Deep_sea_hydrothermal_vent_gp_6(dhveg-6)_None1222	0	1	0	0	3	0	1	0	0	0	0	0	4	0
Arc;_Euryarchaeota;_Halobacteria;_Halobacteriales;_Deep_sea_hydrothermal_vent_gp_6(dhveg-6)_None1224	0	0	0	0	2	0	0	0	0	0	0	0	0	0
Arc;_Euryarchaeota;_Halobacteria;_Halobacteriales;_Deep_sea_hydrothermal_vent_gp_6(dhveg-6)_None1226	0	0	1	0	0	0	0	0	0	0	0	0	0	0
Arc;_Euryarchaeota;_Halobacteria;_Halobacteriales;_Deep_sea_hydrothermal_vent_gp_6(dhveg-6)_None1227	0	0	0	0	0	1	0	2	0	0	0	0	0	0
Arc;_Euryarchaeota;_Halobacteria;_Halobacteriales;_Deep_sea_hydrothermal_vent_gp_6(dhveg-6)_None1229	0	0	0	0	0	0	0	0	0	0	0	0	3	0
Arc;_Euryarchaeota;_Halobacteria;_Halobacteriales;_Deep_sea_hydrothermal_vent_gp_6(dhveg-6)_None123	1	0	0	0	0	4	0	0	7	0	0	0	0	0
Arc;_Euryarchaeota;_Halobacteria;_Halobacteriales;_Deep_sea_hydrothermal_vent_gp_6(dhveg-6)_None1231	0	0	0	0	0	1	0	0	0	0	0	0	0	0
Arc;_Euryarchaeota;_Halobacteria;_Halobacteriales;_Deep_sea_hydrothermal_vent_gp_6(dhveg-6)_None1232	0	0	0	0	0	0	0	0	0	0	0	0	1	0
Arc;_Euryarchaeota;_Halobacteria;_Halobacteriales;_Deep_sea_hydrothermal_vent_gp_6(dhveg-6)_None1233	0	6	0	0	6	1	0	0	1	2	0	0	5	0
Arc;_Euryarchaeota;_Halobacteria;_Halobacteriales;_Deep_sea_hydrothermal_vent_gp_6(dhveg-6)_None1235	1	0	0	0	0	0	0	0	0	0	0	0	5	0
Arc;_Euryarchaeota;_Halobacteria;_Halobacteriales;_Deep_sea_hydrothermal_vent_gp_6(dhveg-6)_None1236	0	0	0	0	0	0	0	1	0	0	0	0	0	0
Arc;_Euryarchaeota;_Halobacteria;_Halobacteriales;_Deep_sea_hydrothermal_vent_gp_6(dhveg-6)_None1240	0	1	16	0	2	29	4	0	3	2	0	0	3	0
Arc;_Euryarchaeota;_Halobacteria;_Halobacteriales;_Deep_sea_hydrothermal_vent_gp_6(dhveg-6)_None1243	0	0	0	0	0	0	0	0	0	0	0	0	4	0
Arc;_Euryarchaeota;_Halobacteria;_Halobacteriales;_Deep_sea_hydrothermal_vent_gp_6(dhveg-6)_None1245	0	0	0	0	0	0	0	0	0	0	0	0	1	0
Arc;_Euryarchaeota;_Halobacteria;_Halobacteriales;_Deep_sea_hydrothermal_vent_gp_6(dhveg-6)_None1248	10	18	54	7	7	102	39	70	24	55	8	0	20	3
Arc;_Euryarchaeota;_Halobacteria;_Halobacteriales;_Deep_sea_hydrothermal_vent_gp_6(dhveg-6)_None1249	0	0	0	0	0	0	0	0	0	0	0	0	1	0
Arc;_Euryarchaeota;_Halobacteria;_Halobacteriales;_Deep_sea_hydrothermal_vent_gp_6(dhveg-6)_None1250	0	0	1	0	0	10	4	20	0	0	0	0	1	0
Arc;_Euryarchaeota;_Halobacteria;_Halobacteriales;_Deep_sea_hydrothermal_vent_gp_6(dhveg-6)_None1254	0	0	0	0	0	1	0	0	0	0	0	0	0	0
Arc;_Euryarchaeota;_Halobacteria;_Halobacteriales;_Deep_sea_hydrothermal_vent_gp_6(dhveg-6)_None1255	0	0	0	0	0	0	0	0	2	0	0	0	5	0
Arc;_Euryarchaeota;_Halobacteria;_Halobacteriales;_Deep_sea_hydrothermal_vent_gp_6(dhveg-6)_None1256	0	0	0	0	1	4	0	0	0	0	0	0	0	0
Arc;_Euryarchaeota;_Halobacteria;_Halobacteriales;_Deep_sea_hydrothermal_vent_gp_6(dhveg-6)_None1257	0	1	0	0	0	0	0	0	0	0	0	0	0	0
Arc;_Euryarchaeota;_Halobacteria;_Halobacteriales;_Deep_sea_hydrothermal_vent_gp_6(dhveg-6)_None126	0	0	1	0	0	0	0	0	0	0	0	0	0	0
Arc;_Euryarchaeota;_Halobacteria;_Halobacteriales;_Deep_sea_hydrothermal_vent_gp_6(dhveg-6)_None1260	0	0	0	0	0	0	0	0	0	0	0	0	1	0
Arc;_Euryarchaeota;_Halobacteria;_Halobacteriales;_Deep_sea_hydrothermal_vent_gp_6(dhveg-6)_None1262	0	0	0	0	1	0	0	0	0	0	0	0	0	0
Arc;_Euryarchaeota;_Halobacteria;_Halobacteriales;_Deep_sea_hydrothermal_vent_gp_6(dhveg-6)_None1269	0	0	0	0	0	0	0	2	0	0	0	4	0	0
Arc;_Euryarchaeota;_Halobacteria;_Halobacteriales;_Deep_sea_hydrothermal_vent_gp_6(dhveg-6)_None127	0	1	0	0	0	1	18	3	0	0	1	0	1	0
Arc;_Euryarchaeota;_Halobacteria;_Halobacteriales;_Deep_sea_hydrothermal_vent_gp_6(dhveg-6)_None1270	0	0	0	0	0	7	0	2	0	4	0	0	0	0
Arc;_Euryarchaeota;_Halobacteria;_Halobacteriales;_Deep_sea_hydrothermal_vent_gp_6(dhveg-6)_None1271	0	0	0	0	0	0	6	0	0	0	0	0	3	0
Arc;_Euryarchaeota;_Halobacteria;_Halobacteriales;_Deep_sea_hydrothermal_vent_gp_6(dhveg-6)_None1273	0	0	0	0	0	0	0	0	1	0	0	0	0	0
Arc;_Euryarchaeota;_Halobacteria;_Halobacteriales;_Deep_sea_hydrothermal_vent_gp_6(dhveg-6)_None1274	0	0	0	0	0	0	0	0	3	0	0	0	0	0
Arc;_Euryarchaeota;_Halobacteria;_Halobacteriales;_Deep_sea_hydrothermal_vent_gp_6(dhveg-6)_None1275	0	0	0	0	0	1	0	0	0	0	0	0	0	0
Arc;_Euryarchaeota;_Halobacteria;_Halobacteriales;_Deep_sea_hydrothermal_vent_gp_6(dhveg-6)_None1280	2	0	0	1	0	2	0	2	0	0	0	0	2	2
Arc;_Euryarchaeota;_Halobacteria;_Halobacteriales;_Deep_sea_hydrothermal_vent_gp_6(dhveg-6)_None1282	0	0	0	0	0	1	0	0	0	0	0	0	0	0
Arc;_Euryarchaeota;_Halobacteria;_Halobacteriales;_Deep_sea_hydrothermal_vent_gp_6(dhveg-6)_None1287	0	0	0	0	0	0	0	0	0	0	0	0	2	0
Arc;_Euryarchaeota;_Halobacteria;_Halobacteriales;_Deep_sea_hydrothermal_vent_gp_6(dhveg-6)_None1289	0	0	0	0	0	1	0	0	0	0	0	2	0	0
Arc;_Euryarchaeota;_Halobacteria;_Halobacteriales;_Deep_sea_hydrothermal_vent_gp_6(dhveg-6)_None129	3	5	0	1	4	7	0	6	0	0	0	0	0	0
Arc;_Euryarchaeota;_Halobacteria;_Halobacteriales;_Deep_sea_hydrothermal_vent_gp_6(dhveg-6)_None1294	0	2	0	0	0	0	0	0	0	0	0	0	0	0
Arc;_Euryarchaeota;_Halobacteria;_Halobacteriales;_Deep_sea_hydrothermal_vent_gp_6(dhveg-6)_None1296	0	0	0	0	1	0	0	0	0	0	0	0	0	0
Arc;_Euryarchaeota;_Halobacteria;_Halobacteriales;_Deep_sea_hydrothermal_vent_gp_6(dhveg-6)_None1298	0	0	0	0	0	3	0	0	0	0	0	0	0	0
Arc;_Euryarchaeota;_Halobacteria;_Halobacteriales;_Deep_sea_hydrothermal_vent_gp_6(dhveg-6)_None1301	0	0	0	0	0	0	0	0	0	0	0	0	2	0
Arc;_Euryarchaeota;_Halobacteria;_Halobacteriales;_Deep_sea_hydrothermal_vent_gp_6(dhveg-6)_None1302	0	2	0	0	0	0	5	1	0	1	1	0	0	0
Arc;_Euryarchaeota;_Halobacteria;_Halobacteriales;_Deep_sea_hydrothermal_vent_gp_6(dhveg-6)_None1303	0	1	0	0	2	108	5	23	14	8	1	0	3	0
Arc;_Euryarchaeota;_Halobacteria;_Halobacteriales;_Deep_sea_hydrothermal_vent_gp_6(dhveg-6)_None1305	2	3	5	0	1	27	21	10	23	1	0	0	6	3
Arc;_Euryarchaeota;_Halobacteria;_Halobacteriales;_Deep_sea_hydrothermal_vent_gp_6(dhveg-6)_None1306	0	0	0	0	0	0	7	0	0	0	0	0	0	0
Arc;_Euryarchaeota;_Halobacteria;_Halobacteriales;_Deep_sea_hydrothermal_vent_gp_6(dhveg-6)_None1308	0	0	0	0	0	0	0	0	1	0	0	0	0	0
Arc;_Euryarchaeota;_Halobacteria;_Halobacteriales;_Deep_sea_hydrothermal_vent_gp_6(dhveg-6)_None131	0	0	0	0	0	0	0	8	0	0	0	0	0	0
Arc;_Euryarchaeota;_Halobacteria;_Halobacteriales;_Deep_sea_hydrothermal_vent_gp_6(dhveg-6)_None1310	0	0	0	0	0	0	0	6	0	0	0	0	0	0
Arc;_Euryarchaeota;_Halobacteria;_Halobacteriales;_Deep_sea_hydrothermal_vent_gp_6(dhveg-6)_None1314	0	0	0	0	0	2	0	0	0	0	0	0	0	0
Arc;_Euryarchaeota;_Halobacteria;_Halobacteriales;_Deep_sea_hydrothermal_vent_gp_6(dhveg-6)_None1315	4	0	0	0	1	0	6	22	0	0	0	0	0	0
Arc;_Euryarchaeota;_Halobacteria;_Halobacteriales;_Deep_sea_hydrothermal_vent_gp_6(dhveg-6)_None1318	0	0	0	0	0	0	0	1	0	0	0	0	0	0
Arc;_Euryarchaeota;_Halobacteria;_Halobacteriales;_Deep_sea_hydrothermal_vent_gp_6(dhveg-6)_None1319	0	0	2	0	0	0	0	0	0	0	0	0	0	0
Arc;_Euryarchaeota;_Halobacteria;_Halobacteriales;_Deep_sea_hydrothermal_vent_gp_6(dhveg-6)_None132	0	0	0	0	0	0	0	0	0	0	0	0	1	1
Arc;_Euryarchaeota;_Halobacteria;_Halobacteriales;_Deep_sea_hydrothermal_vent_gp_6(dhveg-6)_None1322	0	1	0	0	0	0	1	0	0	0	0	0	0	0
Arc;_Euryarchaeota;_Halobacteria;_Halobacteriales;_Deep_sea_hydrothermal_vent_gp_6(dhveg-6)_None1325	0	0	0	0	0	0	0	2	0	0	0	0	0	0
Arc;_Euryarchaeota;_Halobacteria;_Halobacteriales;_Deep_sea_hydrothermal_vent_gp_6(dhveg-6)_None1328	0	5	2	0	0	4	0	1	3	0	0	3	1	0
Arc;_Euryarchaeota;_Halobacteria;_Halobacteriales;_Deep_sea_hydrothermal_vent_gp_6(dhveg-6)_None1329	0	0	0	0	2	2	5	0	3	0	0	0	0	0
Arc;_Euryarchaeota;_Halobacteria;_Halobacteriales;_Deep_sea_hydrothermal_vent_gp_6(dhveg-6)_None1330	0	0	0	0	0	1	0	0	0	0	0	0	0	0
Arc;_Euryarchaeota;_Halobacteria;_Halobacteriales;_Deep_sea_hydrothermal_vent_gp_6(dhveg-6)_None1331	0	0	0	0	0	0	0	0	1	0	0	0	0	0
Arc;_Euryarchaeota;_Halobacteria;_Halobacteriales;_Deep_sea_hydrothermal_vent_gp_6(dhveg-6)_None1333	0	0	0	0	1	0	0	0	0	0	0	0	0	0
Arc;_Euryarchaeota;_Halobacteria;_Halobacteriales;_Deep_sea_hydrothermal_vent_gp_6(dhveg-6)_None1336	0	0	0	0	0	0	0	2	0	0	0	0	0	0
Arc;_Euryarchaeota;_Halobacteria;_Halobacteriales;_Deep_sea_hydrothermal_vent_gp_6(dhveg-6)_None1338	0	0	0	0	1	0	0	0	0	0	0	0	0	0
Arc;_Euryarchaeota;_Halobacteria;_Halobacteriales;_Deep_sea_hydrothermal_vent_gp_6(dhveg-6)_None134	0	0	0	0	0	3	0	0	0	0	0	0	2	0
Arc;_Euryarchaeota;_Halobacteria;_Halobacteriales;_Deep_sea_hydrothermal_vent_gp_6(dhveg-6)_None1343	0	0	0	0	0	0	0	0	1	0	0	0	0	0
Arc;_Euryarchaeota;_Halobacteria;_Halobacteriales;_Deep_sea_hydrothermal_vent_gp_6(dhveg-6)_None1345	0	0	0	2	0	0	0	2	0	0	0	0	0	0
Arc;_Euryarchaeota;_Halobacteria;_Halobacteriales;_Deep_sea_hydrothermal_vent_gp_6(dhveg-6)_None1350	0	0	0	0	0	0	0	0	0	0	0	0	1	0
Arc;_Euryarchaeota;_Halobacteria;_Halobacteriales;_Deep_sea_hydrothermal_vent_gp_6(dhveg-6)_None1352	0	0	0	0	0	0	0	0	3	0	0	0	79	0
Arc;_Euryarchaeota;_Halobacteria;_Halobacteriales;_Deep_sea_hydrothermal_vent_gp_6(dhveg-6)_None1357	0	0	0	0	0	0	0	0	1	0	0	0	0	0
Arc;_Euryarchaeota;_Halobacteria;_Halobacteriales;_Deep_sea_hydrothermal_vent_gp_6(dhveg-6)_None136	0	0	0	0	3	2	6	5	0	0	2	0	0	0
Arc;_Euryarchaeota;_Halobacteria;_Halobacteriales;_Deep_sea_hydrothermal_vent_gp_6(dhveg-6)_None1363	0	0	0	0	0	0	0	0	1	0	0	0	1	0
Arc;_Euryarchaeota;_Halobacteria;_Halobacteriales;_Deep_sea_hydrothermal_vent_gp_6(dhveg-6)_None1365	0	0	0	0	0	1	0	0	0	0	0	0	0	0
Arc;_Euryarchaeota;_Halobacteria;_Halobacteriales;_Deep_sea_hydrothermal_vent_gp_6(dhveg-6)_None1366	0	0	0	0	0	9	0	3	17	1	0	0	38	0
Arc;_Euryarchaeota;_Halobacteria;_Halobacteriales;_Deep_sea_hydrothermal_vent_gp_6(dhveg-6)_None1367	0	0	0	0	0	0	0	0	0	0	0	0	1	0
Arc;_Euryarchaeota;_Halobacteria;_Halobacteriales;_Deep_sea_hydrothermal_vent_gp_6(dhveg-6)_None137	0	0	0	0	0	0	0	0	0	0	1	0	0	0
Arc;_Euryarchaeota;_Halobacteria;_Halobacteriales;_Deep_sea_hydrothermal_vent_gp_6(dhveg-6)_None1374	0	0	1	0	0	0	4	12	0	0	0	0	0	0
Arc;_Euryarchaeota;_Halobacteria;_Halobacteriales;_Deep_sea_hydrothermal_vent_gp_6(dhveg-6)_None1376	0	0	0	0	0	0	0	1	0	0	0	0	0	0
Arc;_Euryarchaeota;_Halobacteria;_Halobacteriales;_Deep_sea_hydrothermal_vent_gp_6(dhveg-6)_None1378	0	0	0	0	0	0	0	6	3	0	0	0	0	0
Arc;_Euryarchaeota;_Halobacteria;_Halobacteriales;_Deep_sea_hydrothermal_vent_gp_6(dhveg-6)_None138	0	0	0	0	0	0	0	0	0	2	0	0	0	0
Arc;_Euryarchaeota;_Halobacteria;_Halobacteriales;_Deep_sea_hydrothermal_vent_gp_6(dhveg-6)_None1380	0	3	0	0	0	0	0	0	0	0	0	0	0	0
Arc;_Euryarchaeota;_Halobacteria;_Halobacteriales;_Deep_sea_hydrothermal_vent_gp_6(dhveg-6)_None1381	0	0	0	1	0	0	0	0	0	0	0	0	0	0
Arc;_Euryarchaeota;_Halobacteria;_Halobacteriales;_Deep_sea_hydrothermal_vent_gp_6(dhveg-6)_None1382	0	0	0	0	0	1	0	2	1	0	0	0	2	0
Arc;_Euryarchaeota;_Halobacteria;_Halobacteriales;_Deep_sea_hydrothermal_vent_gp_6(dhveg-6)_None1383	0	0	0	0	2	0	0	0	0	0	0	0	1	0
Arc;_Euryarchaeota;_Halobacteria;_Halobacteriales;_Deep_sea_hydrothermal_vent_gp_6(dhveg-6)_None1384	0	2	0	0	0	1	1	0	0	0	0	0	0	0
Arc;_Euryarchaeota;_Halobacteria;_Halobacteriales;_Deep_sea_hydrothermal_vent_gp_6(dhveg-6)_None1386	0	0	0	0	0	0	0	0	0	0	0	0	2	0
Arc;_Euryarchaeota;_Halobacteria;_Halobacteriales;_Deep_sea_hydrothermal_vent_gp_6(dhveg-6)_None139	0	0	0	0	0	0	0	1	1	0	0	6	1	0
Arc;_Euryarchaeota;_Halobacteria;_Halobacteriales;_Deep_sea_hydrothermal_vent_gp_6(dhveg-6)_None1391	0	0	0	0	0	2	0	0	0	0	0	0	0	0
Arc;_Euryarchaeota;_Halobacteria;_Halobacteriales;_Deep_sea_hydrothermal_vent_gp_6(dhveg-6)_None1392	0	0	0	0	2	0	0	2	2	0	0	8	0	0
Arc;_Euryarchaeota;_Halobacteria;_Halobacteriales;_Deep_sea_hydrothermal_vent_gp_6(dhveg-6)_None1393	0	0	0	0	0	0	0	0	1	0	0	0	0	0
Arc;_Euryarchaeota;_Halobacteria;_Halobacteriales;_Deep_sea_hydrothermal_vent_gp_6(dhveg-6)_None1396	0	0	0	0	1	1	0	0	0	0	0	0	0	0
Arc;_Euryarchaeota;_Halobacteria;_Halobacteriales;_Deep_sea_hydrothermal_vent_gp_6(dhveg-6)_None14	0	0	0	0	0	0	0	0	0	0	0	0	1	0
Arc;_Euryarchaeota;_Halobacteria;_Halobacteriales;_Deep_sea_hydrothermal_vent_gp_6(dhveg-6)_None140	0	0	1	0	0	0	0	0	0	0	0	0	0	0
Arc;_Euryarchaeota;_Halobacteria;_Halobacteriales;_Deep_sea_hydrothermal_vent_gp_6(dhveg-6)_None1401	0	0	0	0	0	0	0	1	1	0	0	0	0	0
Arc;_Euryarchaeota;_Halobacteria;_Halobacteriales;_Deep_sea_hydrothermal_vent_gp_6(dhveg-6)_None1403	0	0	0	0	2	0	0	0	0	0	0	0	0	0
Arc;_Euryarchaeota;_Halobacteria;_Halobacteriales;_Deep_sea_hydrothermal_vent_gp_6(dhveg-6)_None1404	0	0	0	0	0	0	0	0	0	0	0	0	3	0
Arc;_Euryarchaeota;_Halobacteria;_Halobacteriales;_Deep_sea_hydrothermal_vent_gp_6(dhveg-6)_None1405	0	0	0	0	0	0	0	0	0	0	0	0	1	0
Arc;_Euryarchaeota;_Halobacteria;_Halobacteriales;_Deep_sea_hydrothermal_vent_gp_6(dhveg-6)_None1406	0	4	0	3	0	1	68	0	9	0	6	3	0	0
Arc;_Euryarchaeota;_Halobacteria;_Halobacteriales;_Deep_sea_hydrothermal_vent_gp_6(dhveg-6)_None1407	0	0	0	0	0	0	0	1	0	0	0	0	0	0
Arc;_Euryarchaeota;_Halobacteria;_Halobacteriales;_Deep_sea_hydrothermal_vent_gp_6(dhveg-6)_None1412	0	0	0	0	0	12	4	4	0	0	0	0	0	0
Arc;_Euryarchaeota;_Halobacteria;_Halobacteriales;_Deep_sea_hydrothermal_vent_gp_6(dhveg-6)_None1417	0	0	0	0	0	1	0	0	0	0	0	0	0	0
Arc;_Euryarchaeota;_Halobacteria;_Halobacteriales;_Deep_sea_hydrothermal_vent_gp_6(dhveg-6)_None1420	0	3	0	0	0	0	0	0	0	0	0	0	0	0
Arc;_Euryarchaeota;_Halobacteria;_Halobacteriales;_Deep_sea_hydrothermal_vent_gp_6(dhveg-6)_None1423	3	0	0	0	0	8	11	2	2	9	0	0	2	0
Arc;_Euryarchaeota;_Halobacteria;_Halobacteriales;_Deep_sea_hydrothermal_vent_gp_6(dhveg-6)_None1424	1	0	0	0	0	0	0	0	0	0	0	0	0	0
Arc;_Euryarchaeota;_Halobacteria;_Halobacteriales;_Deep_sea_hydrothermal_vent_gp_6(dhveg-6)_None1425	0	0	0	0	0	2	0	0	2	0	0	0	1	0
Arc;_Euryarchaeota;_Halobacteria;_Halobacteriales;_Deep_sea_hydrothermal_vent_gp_6(dhveg-6)_None1426	1	0	0	0	0	0	0	0	0	0	0	0	0	0
Arc;_Euryarchaeota;_Halobacteria;_Halobacteriales;_Deep_sea_hydrothermal_vent_gp_6(dhveg-6)_None1427	1	0	0	0	0	1	0	0	11	1	2	1	2	0
Arc;_Euryarchaeota;_Halobacteria;_Halobacteriales;_Deep_sea_hydrothermal_vent_gp_6(dhveg-6)_None143	0	1	1	0	1	0	0	8	1	1	0	0	0	0
Arc;_Euryarchaeota;_Halobacteria;_Halobacteriales;_Deep_sea_hydrothermal_vent_gp_6(dhveg-6)_None1430	2	0	0	0	0	0	0	0	0	0	0	0	0	0
Arc;_Euryarchaeota;_Halobacteria;_Halobacteriales;_Deep_sea_hydrothermal_vent_gp_6(dhveg-6)_None1434	0	0	0	0	0	0	0	0	0	0	0	0	5	0
Arc;_Euryarchaeota;_Halobacteria;_Halobacteriales;_Deep_sea_hydrothermal_vent_gp_6(dhveg-6)_None1435	0	0	0	0	0	0	0	0	0	0	0	0	1	0
Arc;_Euryarchaeota;_Halobacteria;_Halobacteriales;_Deep_sea_hydrothermal_vent_gp_6(dhveg-6)_None1437	0	6	5	2	5	5	0	4	1	3	0	0	1	0
Arc;_Euryarchaeota;_Halobacteria;_Halobacteriales;_Deep_sea_hydrothermal_vent_gp_6(dhveg-6)_None1439	0	0	0	0	0	9	0	0	0	0	0	0	0	0
Arc;_Euryarchaeota;_Halobacteria;_Halobacteriales;_Deep_sea_hydrothermal_vent_gp_6(dhveg-6)_None144	0	0	0	0	0	0	0	0	0	0	1	0	0	0
Arc;_Euryarchaeota;_Halobacteria;_Halobacteriales;_Deep_sea_hydrothermal_vent_gp_6(dhveg-6)_None1441	0	0	0	0	3	39	0	26	5	0	1	0	0	0
Arc;_Euryarchaeota;_Halobacteria;_Halobacteriales;_Deep_sea_hydrothermal_vent_gp_6(dhveg-6)_None1444	0	0	0	0	0	0	2	0	0	0	0	0	0	0
Arc;_Euryarchaeota;_Halobacteria;_Halobacteriales;_Deep_sea_hydrothermal_vent_gp_6(dhveg-6)_None1445	0	0	0	0	0	0	0	2	3	1	0	0	0	0
Arc;_Euryarchaeota;_Halobacteria;_Halobacteriales;_Deep_sea_hydrothermal_vent_gp_6(dhveg-6)_None1448	0	0	1	0	0	0	0	1	0	0	0	2	0	0
Arc;_Euryarchaeota;_Halobacteria;_Halobacteriales;_Deep_sea_hydrothermal_vent_gp_6(dhveg-6)_None145	0	2	1	2	0	0	2	37	9	0	0	3	1	0
Arc;_Euryarchaeota;_Halobacteria;_Halobacteriales;_Deep_sea_hydrothermal_vent_gp_6(dhveg-6)_None1450	0	0	0	0	0	0	0	0	1	0	0	0	1	0
Arc;_Euryarchaeota;_Halobacteria;_Halobacteriales;_Deep_sea_hydrothermal_vent_gp_6(dhveg-6)_None1451	0	0	0	0	0	0	0	0	1	0	0	0	0	0
Arc;_Euryarchaeota;_Halobacteria;_Halobacteriales;_Deep_sea_hydrothermal_vent_gp_6(dhveg-6)_None1452	0	0	0	0	3	0	0	0	0	0	0	0	0	0
Arc;_Euryarchaeota;_Halobacteria;_Halobacteriales;_Deep_sea_hydrothermal_vent_gp_6(dhveg-6)_None1455	0	0	0	0	0	0	0	0	7	0	0	0	1	0
Arc;_Euryarchaeota;_Halobacteria;_Halobacteriales;_Deep_sea_hydrothermal_vent_gp_6(dhveg-6)_None1456	0	0	0	0	1	0	0	0	0	0	0	0	0	0
Arc;_Euryarchaeota;_Halobacteria;_Halobacteriales;_Deep_sea_hydrothermal_vent_gp_6(dhveg-6)_None1458	0	0	0	0	0	0	3	0	0	0	0	0	0	0
Arc;_Euryarchaeota;_Halobacteria;_Halobacteriales;_Deep_sea_hydrothermal_vent_gp_6(dhveg-6)_None1460	0	0	2	2	1	0	0	1	4	2	11	1	0	0
Arc;_Euryarchaeota;_Halobacteria;_Halobacteriales;_Deep_sea_hydrothermal_vent_gp_6(dhveg-6)_None1463	0	0	0	0	0	0	0	0	2	0	0	12	0	0
Arc;_Euryarchaeota;_Halobacteria;_Halobacteriales;_Deep_sea_hydrothermal_vent_gp_6(dhveg-6)_None1467	0	0	0	0	0	0	0	0	1	0	0	0	0	0
Arc;_Euryarchaeota;_Halobacteria;_Halobacteriales;_Deep_sea_hydrothermal_vent_gp_6(dhveg-6)_None1468	0	0	0	0	1	1	0	0	0	0	0	0	2	0
Arc;_Euryarchaeota;_Halobacteria;_Halobacteriales;_Deep_sea_hydrothermal_vent_gp_6(dhveg-6)_None1469	0	0	0	0	0	0	0	0	1	0	0	0	0	0
Arc;_Euryarchaeota;_Halobacteria;_Halobacteriales;_Deep_sea_hydrothermal_vent_gp_6(dhveg-6)_None147	0	0	0	0	0	0	0	3	0	0	0	0	0	0
Arc;_Euryarchaeota;_Halobacteria;_Halobacteriales;_Deep_sea_hydrothermal_vent_gp_6(dhveg-6)_None1470	0	0	7	0	0	1	2	5	1	0	1	2	0	0
Arc;_Euryarchaeota;_Halobacteria;_Halobacteriales;_Deep_sea_hydrothermal_vent_gp_6(dhveg-6)_None1472	0	0	0	0	0	0	0	2	0	0	0	0	0	0
Arc;_Euryarchaeota;_Halobacteria;_Halobacteriales;_Deep_sea_hydrothermal_vent_gp_6(dhveg-6)_None1475	0	0	0	0	0	0	0	0	4	0	0	0	0	0
Arc;_Euryarchaeota;_Halobacteria;_Halobacteriales;_Deep_sea_hydrothermal_vent_gp_6(dhveg-6)_None1476	0	0	0	0	1	0	0	0	0	0	0	0	0	0
Arc;_Euryarchaeota;_Halobacteria;_Halobacteriales;_Deep_sea_hydrothermal_vent_gp_6(dhveg-6)_None1478	0	0	0	0	0	0	0	0	0	0	0	0	1	0
Arc;_Euryarchaeota;_Halobacteria;_Halobacteriales;_Deep_sea_hydrothermal_vent_gp_6(dhveg-6)_None1479	0	1	0	0	0	2	0	0	0	1	0	0	0	0
Arc;_Euryarchaeota;_Halobacteria;_Halobacteriales;_Deep_sea_hydrothermal_vent_gp_6(dhveg-6)_None148	0	1	0	0	0	0	0	0	0	0	0	0	0	0
Arc;_Euryarchaeota;_Halobacteria;_Halobacteriales;_Deep_sea_hydrothermal_vent_gp_6(dhveg-6)_None1480	0	0	0	13	0	0	0	0	0	0	0	0	0	0
Arc;_Euryarchaeota;_Halobacteria;_Halobacteriales;_Deep_sea_hydrothermal_vent_gp_6(dhveg-6)_None1483	0	0	0	0	0	1	0	0	0	0	0	0	0	0
Arc;_Euryarchaeota;_Halobacteria;_Halobacteriales;_Deep_sea_hydrothermal_vent_gp_6(dhveg-6)_None1484	17	0	3	1	0	10	0	7	22	8	0	0	3	6
Arc;_Euryarchaeota;_Halobacteria;_Halobacteriales;_Deep_sea_hydrothermal_vent_gp_6(dhveg-6)_None1488	0	0	0	0	1	0	0	0	0	0	0	0	0	0
Arc;_Euryarchaeota;_Halobacteria;_Halobacteriales;_Deep_sea_hydrothermal_vent_gp_6(dhveg-6)_None149	0	0	0	0	0	0	0	0	0	0	0	0	5	0
Arc;_Euryarchaeota;_Halobacteria;_Halobacteriales;_Deep_sea_hydrothermal_vent_gp_6(dhveg-6)_None1490	0	0	0	0	0	0	0	0	4	0	0	0	2	0
Arc;_Euryarchaeota;_Halobacteria;_Halobacteriales;_Deep_sea_hydrothermal_vent_gp_6(dhveg-6)_None1492	0	0	0	0	2	0	0	0	2	0	0	0	0	0
Arc;_Euryarchaeota;_Halobacteria;_Halobacteriales;_Deep_sea_hydrothermal_vent_gp_6(dhveg-6)_None1493	0	0	0	0	0	0	0	0	0	0	0	0	4	0
Arc;_Euryarchaeota;_Halobacteria;_Halobacteriales;_Deep_sea_hydrothermal_vent_gp_6(dhveg-6)_None1495	0	0	0	0	0	0	0	2	4	3	0	0	2	0
Arc;_Euryarchaeota;_Halobacteria;_Halobacteriales;_Deep_sea_hydrothermal_vent_gp_6(dhveg-6)_None1496	0	0	0	0	0	1	0	0	0	0	0	0	0	0
Arc;_Euryarchaeota;_Halobacteria;_Halobacteriales;_Deep_sea_hydrothermal_vent_gp_6(dhveg-6)_None15	0	0	0	1	0	0	0	0	0	0	0	0	0	0
Arc;_Euryarchaeota;_Halobacteria;_Halobacteriales;_Deep_sea_hydrothermal_vent_gp_6(dhveg-6)_None1500	0	0	0	0	1	0	0	0	1	0	0	0	5	0
Arc;_Euryarchaeota;_Halobacteria;_Halobacteriales;_Deep_sea_hydrothermal_vent_gp_6(dhveg-6)_None1501	0	0	0	0	0	0	0	0	1	0	0	0	2	0
Arc;_Euryarchaeota;_Halobacteria;_Halobacteriales;_Deep_sea_hydrothermal_vent_gp_6(dhveg-6)_None1504	0	0	0	0	1	0	0	0	0	0	0	0	0	0
Arc;_Euryarchaeota;_Halobacteria;_Halobacteriales;_Deep_sea_hydrothermal_vent_gp_6(dhveg-6)_None1505	1	0	0	0	0	0	0	0	0	0	0	0	0	0
Arc;_Euryarchaeota;_Halobacteria;_Halobacteriales;_Deep_sea_hydrothermal_vent_gp_6(dhveg-6)_None1506	4	0	0	0	0	2	6	0	2	0	0	0	1	0
Arc;_Euryarchaeota;_Halobacteria;_Halobacteriales;_Deep_sea_hydrothermal_vent_gp_6(dhveg-6)_None1508	0	0	0	0	0	0	0	1	0	0	0	0	0	0
Arc;_Euryarchaeota;_Halobacteria;_Halobacteriales;_Deep_sea_hydrothermal_vent_gp_6(dhveg-6)_None1509	0	0	2	0	0	0	0	0	0	0	0	0	0	0
Arc;_Euryarchaeota;_Halobacteria;_Halobacteriales;_Deep_sea_hydrothermal_vent_gp_6(dhveg-6)_None1510	0	2	0	0	0	2	4	0	1	0	0	0	0	0
Arc;_Euryarchaeota;_Halobacteria;_Halobacteriales;_Deep_sea_hydrothermal_vent_gp_6(dhveg-6)_None1511	0	1	0	0	0	0	0	0	0	4	0	0	1	0
Arc;_Euryarchaeota;_Halobacteria;_Halobacteriales;_Deep_sea_hydrothermal_vent_gp_6(dhveg-6)_None1512	0	0	0	0	0	0	0	8	0	0	0	0	0	0
Arc;_Euryarchaeota;_Halobacteria;_Halobacteriales;_Deep_sea_hydrothermal_vent_gp_6(dhveg-6)_None1514	0	0	0	0	0	0	0	0	1	0	0	0	0	0
Arc;_Euryarchaeota;_Halobacteria;_Halobacteriales;_Deep_sea_hydrothermal_vent_gp_6(dhveg-6)_None1515	0	0	0	0	0	0	0	0	2	0	0	0	0	0
Arc;_Euryarchaeota;_Halobacteria;_Halobacteriales;_Deep_sea_hydrothermal_vent_gp_6(dhveg-6)_None1517	0	0	0	0	0	0	0	0	0	0	0	0	1	0
Arc;_Euryarchaeota;_Halobacteria;_Halobacteriales;_Deep_sea_hydrothermal_vent_gp_6(dhveg-6)_None1519	0	0	0	0	0	0	0	0	8	0	0	0	0	0
Arc;_Euryarchaeota;_Halobacteria;_Halobacteriales;_Deep_sea_hydrothermal_vent_gp_6(dhveg-6)_None152	3	0	0	0	5	2	6	0	1	1	1	1	11	2
Arc;_Euryarchaeota;_Halobacteria;_Halobacteriales;_Deep_sea_hydrothermal_vent_gp_6(dhveg-6)_None1520	0	0	0	0	0	0	0	0	1	0	0	0	0	0
Arc;_Euryarchaeota;_Halobacteria;_Halobacteriales;_Deep_sea_hydrothermal_vent_gp_6(dhveg-6)_None1523	0	0	0	1	0	2	0	0	0	0	0	0	0	0
Arc;_Euryarchaeota;_Halobacteria;_Halobacteriales;_Deep_sea_hydrothermal_vent_gp_6(dhveg-6)_None1524	0	0	0	0	0	1	0	0	1	0	0	0	0	0
Arc;_Euryarchaeota;_Halobacteria;_Halobacteriales;_Deep_sea_hydrothermal_vent_gp_6(dhveg-6)_None1527	0	0	0	0	0	4	0	1	1	2	0	0	1	0
Arc;_Euryarchaeota;_Halobacteria;_Halobacteriales;_Deep_sea_hydrothermal_vent_gp_6(dhveg-6)_None1528	0	0	0	0	3	2	0	0	0	0	0	0	0	0
Arc;_Euryarchaeota;_Halobacteria;_Halobacteriales;_Deep_sea_hydrothermal_vent_gp_6(dhveg-6)_None1529	2	1	0	1	0	21	1	35	9	32	0	0	7	0
Arc;_Euryarchaeota;_Halobacteria;_Halobacteriales;_Deep_sea_hydrothermal_vent_gp_6(dhveg-6)_None153	0	0	0	0	0	0	0	2	0	0	0	2	0	0
Arc;_Euryarchaeota;_Halobacteria;_Halobacteriales;_Deep_sea_hydrothermal_vent_gp_6(dhveg-6)_None1530	0	0	0	0	3	1	0	12	6	0	0	0	4	0
Arc;_Euryarchaeota;_Halobacteria;_Halobacteriales;_Deep_sea_hydrothermal_vent_gp_6(dhveg-6)_None1531	1	0	0	0	2	0	0	0	0	0	0	0	13	0
Arc;_Euryarchaeota;_Halobacteria;_Halobacteriales;_Deep_sea_hydrothermal_vent_gp_6(dhveg-6)_None1532	0	0	0	0	0	0	0	4	0	0	0	0	0	0
Arc;_Euryarchaeota;_Halobacteria;_Halobacteriales;_Deep_sea_hydrothermal_vent_gp_6(dhveg-6)_None1533	0	0	0	0	0	0	0	1	0	0	0	0	0	0
Arc;_Euryarchaeota;_Halobacteria;_Halobacteriales;_Deep_sea_hydrothermal_vent_gp_6(dhveg-6)_None1534	0	1	0	0	0	0	0	0	0	0	0	0	0	0
Arc;_Euryarchaeota;_Halobacteria;_Halobacteriales;_Deep_sea_hydrothermal_vent_gp_6(dhveg-6)_None1537	0	0	0	0	0	0	0	0	4	0	0	1	0	0
Arc;_Euryarchaeota;_Halobacteria;_Halobacteriales;_Deep_sea_hydrothermal_vent_gp_6(dhveg-6)_None1539	0	1	0	0	0	0	0	0	0	0	0	0	0	0
Arc;_Euryarchaeota;_Halobacteria;_Halobacteriales;_Deep_sea_hydrothermal_vent_gp_6(dhveg-6)_None154	0	0	0	0	0	1	0	0	0	0	0	0	0	0
Arc;_Euryarchaeota;_Halobacteria;_Halobacteriales;_Deep_sea_hydrothermal_vent_gp_6(dhveg-6)_None1541	0	0	0	0	0	3	0	0	0	6	0	0	0	0
Arc;_Euryarchaeota;_Halobacteria;_Halobacteriales;_Deep_sea_hydrothermal_vent_gp_6(dhveg-6)_None1542	1	1	0	4	0	2	15	20	1	1	1	0	0	0
Arc;_Euryarchaeota;_Halobacteria;_Halobacteriales;_Deep_sea_hydrothermal_vent_gp_6(dhveg-6)_None1544	0	1	0	1	3	3	2	0	6	0	0	0	0	0
Arc;_Euryarchaeota;_Halobacteria;_Halobacteriales;_Deep_sea_hydrothermal_vent_gp_6(dhveg-6)_None1545	0	0	0	0	0	2	1	0	0	0	0	0	0	0
Arc;_Euryarchaeota;_Halobacteria;_Halobacteriales;_Deep_sea_hydrothermal_vent_gp_6(dhveg-6)_None1546	1	3	43	1	24	15	43	13	18	15	9	15	5	6
Arc;_Euryarchaeota;_Halobacteria;_Halobacteriales;_Deep_sea_hydrothermal_vent_gp_6(dhveg-6)_None1547	0	0	1	0	0	0	0	0	1	0	0	0	0	0
Arc;_Euryarchaeota;_Halobacteria;_Halobacteriales;_Deep_sea_hydrothermal_vent_gp_6(dhveg-6)_None1548	0	0	0	0	0	0	0	0	0	0	0	0	1	0
Arc;_Euryarchaeota;_Halobacteria;_Halobacteriales;_Deep_sea_hydrothermal_vent_gp_6(dhveg-6)_None1549	0	2	0	0	1	1	2	0	43	0	0	0	5	0
Arc;_Euryarchaeota;_Halobacteria;_Halobacteriales;_Deep_sea_hydrothermal_vent_gp_6(dhveg-6)_None155	0	1	0	0	0	0	0	0	0	0	0	0	0	0
Arc;_Euryarchaeota;_Halobacteria;_Halobacteriales;_Deep_sea_hydrothermal_vent_gp_6(dhveg-6)_None1551	0	38	0	0	2	7	0	0	0	0	0	0	1	0
Arc;_Euryarchaeota;_Halobacteria;_Halobacteriales;_Deep_sea_hydrothermal_vent_gp_6(dhveg-6)_None1552	0	0	0	0	1	0	0	0	0	0	0	0	0	0
Arc;_Euryarchaeota;_Halobacteria;_Halobacteriales;_Deep_sea_hydrothermal_vent_gp_6(dhveg-6)_None1553	0	0	0	0	0	4	0	0	2	0	0	0	3	0
Arc;_Euryarchaeota;_Halobacteria;_Halobacteriales;_Deep_sea_hydrothermal_vent_gp_6(dhveg-6)_None1554	0	0	1	0	0	0	1	0	0	0	1	0	0	0
Arc;_Euryarchaeota;_Halobacteria;_Halobacteriales;_Deep_sea_hydrothermal_vent_gp_6(dhveg-6)_None1558	0	0	0	0	1	0	0	0	0	0	0	0	0	0
Arc;_Euryarchaeota;_Halobacteria;_Halobacteriales;_Deep_sea_hydrothermal_vent_gp_6(dhveg-6)_None156	0	1	20	0	0	1	2	3	5	0	0	0	0	0
Arc;_Euryarchaeota;_Halobacteria;_Halobacteriales;_Deep_sea_hydrothermal_vent_gp_6(dhveg-6)_None1560	0	0	0	0	0	0	0	0	0	0	0	0	1	0
Arc;_Euryarchaeota;_Halobacteria;_Halobacteriales;_Deep_sea_hydrothermal_vent_gp_6(dhveg-6)_None1562	0	0	0	0	1	0	0	0	0	0	0	0	2	0
Arc;_Euryarchaeota;_Halobacteria;_Halobacteriales;_Deep_sea_hydrothermal_vent_gp_6(dhveg-6)_None1563	0	0	0	0	0	0	0	2	0	0	0	0	0	0
Arc;_Euryarchaeota;_Halobacteria;_Halobacteriales;_Deep_sea_hydrothermal_vent_gp_6(dhveg-6)_None1564	0	1	0	0	0	0	0	0	1	0	0	0	0	0
Arc;_Euryarchaeota;_Halobacteria;_Halobacteriales;_Deep_sea_hydrothermal_vent_gp_6(dhveg-6)_None1565	2	0	0	2	0	2	81	17	9	15	31	5	0	0
Arc;_Euryarchaeota;_Halobacteria;_Halobacteriales;_Deep_sea_hydrothermal_vent_gp_6(dhveg-6)_None1567	0	0	0	0	0	1	2	0	0	0	0	0	0	0
Arc;_Euryarchaeota;_Halobacteria;_Halobacteriales;_Deep_sea_hydrothermal_vent_gp_6(dhveg-6)_None157	0	0	0	0	0	2	4	3	1	0	0	0	0	0
Arc;_Euryarchaeota;_Halobacteria;_Halobacteriales;_Deep_sea_hydrothermal_vent_gp_6(dhveg-6)_None1570	0	0	0	0	0	8	0	0	5	0	0	0	0	0
Arc;_Euryarchaeota;_Halobacteria;_Halobacteriales;_Deep_sea_hydrothermal_vent_gp_6(dhveg-6)_None1571	0	0	0	3	1	0	1	0	2	0	8	0	0	0
Arc;_Euryarchaeota;_Halobacteria;_Halobacteriales;_Deep_sea_hydrothermal_vent_gp_6(dhveg-6)_None1572	0	0	0	0	0	0	0	1	0	0	0	0	0	0
Arc;_Euryarchaeota;_Halobacteria;_Halobacteriales;_Deep_sea_hydrothermal_vent_gp_6(dhveg-6)_None1573	0	0	0	2	0	0	0	0	0	0	0	0	0	0
Arc;_Euryarchaeota;_Halobacteria;_Halobacteriales;_Deep_sea_hydrothermal_vent_gp_6(dhveg-6)_None1576	0	5	0	0	0	0	0	0	0	0	0	0	0	0
Arc;_Euryarchaeota;_Halobacteria;_Halobacteriales;_Deep_sea_hydrothermal_vent_gp_6(dhveg-6)_None1578	0	0	1	0	0	0	0	0	0	0	0	0	0	0
Arc;_Euryarchaeota;_Halobacteria;_Halobacteriales;_Deep_sea_hydrothermal_vent_gp_6(dhveg-6)_None1579	0	1	0	0	0	0	0	0	0	0	0	0	0	0
Arc;_Euryarchaeota;_Halobacteria;_Halobacteriales;_Deep_sea_hydrothermal_vent_gp_6(dhveg-6)_None158	1	0	0	0	0	0	0	0	0	3	0	0	0	0
Arc;_Euryarchaeota;_Halobacteria;_Halobacteriales;_Deep_sea_hydrothermal_vent_gp_6(dhveg-6)_None1582	0	0	0	0	0	2	0	0	2	0	0	0	5	0
Arc;_Euryarchaeota;_Halobacteria;_Halobacteriales;_Deep_sea_hydrothermal_vent_gp_6(dhveg-6)_None1583	0	3	0	0	0	0	0	0	0	0	0	0	0	0
Arc;_Euryarchaeota;_Halobacteria;_Halobacteriales;_Deep_sea_hydrothermal_vent_gp_6(dhveg-6)_None1584	0	0	5	0	0	6	2	3	0	0	0	0	2	0
Arc;_Euryarchaeota;_Halobacteria;_Halobacteriales;_Deep_sea_hydrothermal_vent_gp_6(dhveg-6)_None1585	3	2	0	0	8	2	0	0	0	0	0	0	3	0
Arc;_Euryarchaeota;_Halobacteria;_Halobacteriales;_Deep_sea_hydrothermal_vent_gp_6(dhveg-6)_None1586	0	0	0	0	0	0	0	0	3	0	0	0	1	0
Arc;_Euryarchaeota;_Halobacteria;_Halobacteriales;_Deep_sea_hydrothermal_vent_gp_6(dhveg-6)_None1587	0	0	0	0	1	0	0	0	0	0	0	0	0	0
Arc;_Euryarchaeota;_Halobacteria;_Halobacteriales;_Deep_sea_hydrothermal_vent_gp_6(dhveg-6)_None1588	0	0	0	0	0	0	0	0	4	0	0	0	4	0
Arc;_Euryarchaeota;_Halobacteria;_Halobacteriales;_Deep_sea_hydrothermal_vent_gp_6(dhveg-6)_None1590	0	0	0	0	0	0	0	0	1	0	0	0	0	0
Arc;_Euryarchaeota;_Halobacteria;_Halobacteriales;_Deep_sea_hydrothermal_vent_gp_6(dhveg-6)_None1591	0	0	0	0	0	0	0	5	0	0	0	0	0	0
Arc;_Euryarchaeota;_Halobacteria;_Halobacteriales;_Deep_sea_hydrothermal_vent_gp_6(dhveg-6)_None1594	0	2	1	0	2	45	9	4	6	1	4	0	1	0
Arc;_Euryarchaeota;_Halobacteria;_Halobacteriales;_Deep_sea_hydrothermal_vent_gp_6(dhveg-6)_None1595	4	3	10	0	2	5	4	28	7	36	51	6	7	0
Arc;_Euryarchaeota;_Halobacteria;_Halobacteriales;_Deep_sea_hydrothermal_vent_gp_6(dhveg-6)_None1596	1	0	0	0	7	21	32	73	25	2	10	0	2	0
Arc;_Euryarchaeota;_Halobacteria;_Halobacteriales;_Deep_sea_hydrothermal_vent_gp_6(dhveg-6)_None1598	0	0	0	0	0	1	0	0	0	0	0	0	3	0
Arc;_Euryarchaeota;_Halobacteria;_Halobacteriales;_Deep_sea_hydrothermal_vent_gp_6(dhveg-6)_None160	0	0	0	0	0	0	0	0	12	0	0	0	0	0
Arc;_Euryarchaeota;_Halobacteria;_Halobacteriales;_Deep_sea_hydrothermal_vent_gp_6(dhveg-6)_None1600	2	0	0	0	0	0	0	0	0	0	0	0	0	0
Arc;_Euryarchaeota;_Halobacteria;_Halobacteriales;_Deep_sea_hydrothermal_vent_gp_6(dhveg-6)_None1601	0	1	0	1	0	11	0	0	0	1	0	0	0	0
Arc;_Euryarchaeota;_Halobacteria;_Halobacteriales;_Deep_sea_hydrothermal_vent_gp_6(dhveg-6)_None1604	0	20	0	3	12	9	5	34	13	1	0	0	7	2
Arc;_Euryarchaeota;_Halobacteria;_Halobacteriales;_Deep_sea_hydrothermal_vent_gp_6(dhveg-6)_None1608	0	0	0	0	0	1	0	0	0	0	0	0	0	0
Arc;_Euryarchaeota;_Halobacteria;_Halobacteriales;_Deep_sea_hydrothermal_vent_gp_6(dhveg-6)_None1609	0	0	0	0	0	0	0	1	0	0	0	0	1	0
Arc;_Euryarchaeota;_Halobacteria;_Halobacteriales;_Deep_sea_hydrothermal_vent_gp_6(dhveg-6)_None161	1	0	0	0	0	0	0	1	1	0	0	0	0	0
Arc;_Euryarchaeota;_Halobacteria;_Halobacteriales;_Deep_sea_hydrothermal_vent_gp_6(dhveg-6)_None1610	0	0	0	0	0	0	0	0	7	0	0	0	2	0
Arc;_Euryarchaeota;_Halobacteria;_Halobacteriales;_Deep_sea_hydrothermal_vent_gp_6(dhveg-6)_None1613	0	0	0	0	0	1	0	0	0	0	0	0	0	0
Arc;_Euryarchaeota;_Halobacteria;_Halobacteriales;_Deep_sea_hydrothermal_vent_gp_6(dhveg-6)_None1616	0	0	0	0	0	0	1	0	4	0	0	0	1	0
Arc;_Euryarchaeota;_Halobacteria;_Halobacteriales;_Deep_sea_hydrothermal_vent_gp_6(dhveg-6)_None1617	0	0	2	0	0	0	0	2	10	0	0	0	1	0
Arc;_Euryarchaeota;_Halobacteria;_Halobacteriales;_Deep_sea_hydrothermal_vent_gp_6(dhveg-6)_None1618	0	0	0	0	1	6	0	0	0	0	0	0	1	0
Arc;_Euryarchaeota;_Halobacteria;_Halobacteriales;_Deep_sea_hydrothermal_vent_gp_6(dhveg-6)_None1619	0	0	0	0	0	0	0	0	0	0	0	5	0	0
Arc;_Euryarchaeota;_Halobacteria;_Halobacteriales;_Deep_sea_hydrothermal_vent_gp_6(dhveg-6)_None162	0	0	0	0	0	3	0	0	0	0	0	0	0	0
Arc;_Euryarchaeota;_Halobacteria;_Halobacteriales;_Deep_sea_hydrothermal_vent_gp_6(dhveg-6)_None1623	0	0	0	0	1	0	0	0	0	0	0	0	0	0
Arc;_Euryarchaeota;_Halobacteria;_Halobacteriales;_Deep_sea_hydrothermal_vent_gp_6(dhveg-6)_None1624	0	0	0	0	1	0	0	1	0	0	0	0	0	0
Arc;_Euryarchaeota;_Halobacteria;_Halobacteriales;_Deep_sea_hydrothermal_vent_gp_6(dhveg-6)_None1625	0	0	0	0	0	0	0	0	0	10	0	0	1	0
Arc;_Euryarchaeota;_Halobacteria;_Halobacteriales;_Deep_sea_hydrothermal_vent_gp_6(dhveg-6)_None1626	2	0	0	0	0	0	0	1	0	0	0	0	0	0
Arc;_Euryarchaeota;_Halobacteria;_Halobacteriales;_Deep_sea_hydrothermal_vent_gp_6(dhveg-6)_None163	0	1	0	0	0	0	0	0	0	0	0	0	0	0
Arc;_Euryarchaeota;_Halobacteria;_Halobacteriales;_Deep_sea_hydrothermal_vent_gp_6(dhveg-6)_None1634	0	0	0	0	0	0	0	0	2	0	0	0	2	0
Arc;_Euryarchaeota;_Halobacteria;_Halobacteriales;_Deep_sea_hydrothermal_vent_gp_6(dhveg-6)_None1636	0	0	0	0	0	0	0	1	1	1	0	0	0	0
Arc;_Euryarchaeota;_Halobacteria;_Halobacteriales;_Deep_sea_hydrothermal_vent_gp_6(dhveg-6)_None1637	0	0	0	0	0	0	0	0	0	0	0	0	1	0
Arc;_Euryarchaeota;_Halobacteria;_Halobacteriales;_Deep_sea_hydrothermal_vent_gp_6(dhveg-6)_None164	0	0	0	0	1	2	0	1	5	1	2	0	6	0
Arc;_Euryarchaeota;_Halobacteria;_Halobacteriales;_Deep_sea_hydrothermal_vent_gp_6(dhveg-6)_None1640	0	0	0	0	0	0	0	0	2	0	0	0	1	0
Arc;_Euryarchaeota;_Halobacteria;_Halobacteriales;_Deep_sea_hydrothermal_vent_gp_6(dhveg-6)_None1642	0	0	0	2	0	0	0	0	0	0	0	0	0	0
Arc;_Euryarchaeota;_Halobacteria;_Halobacteriales;_Deep_sea_hydrothermal_vent_gp_6(dhveg-6)_None1643	0	0	0	0	0	0	0	0	0	0	0	0	1	0
Arc;_Euryarchaeota;_Halobacteria;_Halobacteriales;_Deep_sea_hydrothermal_vent_gp_6(dhveg-6)_None1645	0	0	0	0	0	4	0	0	5	0	0	0	0	3
Arc;_Euryarchaeota;_Halobacteria;_Halobacteriales;_Deep_sea_hydrothermal_vent_gp_6(dhveg-6)_None1647	0	0	0	0	0	0	0	0	2	0	0	0	2	0
Arc;_Euryarchaeota;_Halobacteria;_Halobacteriales;_Deep_sea_hydrothermal_vent_gp_6(dhveg-6)_None1648	0	0	0	0	0	0	0	1	0	0	0	0	0	0
Arc;_Euryarchaeota;_Halobacteria;_Halobacteriales;_Deep_sea_hydrothermal_vent_gp_6(dhveg-6)_None165	0	0	0	0	0	1	2	12	3	0	0	0	4	0
Arc;_Euryarchaeota;_Halobacteria;_Halobacteriales;_Deep_sea_hydrothermal_vent_gp_6(dhveg-6)_None1651	0	1	0	0	0	0	0	0	0	0	0	0	0	0
Arc;_Euryarchaeota;_Halobacteria;_Halobacteriales;_Deep_sea_hydrothermal_vent_gp_6(dhveg-6)_None1652	0	0	0	0	0	0	0	0	1	0	0	0	0	0
Arc;_Euryarchaeota;_Halobacteria;_Halobacteriales;_Deep_sea_hydrothermal_vent_gp_6(dhveg-6)_None1655	0	0	0	0	3	2	0	0	0	0	0	0	0	0
Arc;_Euryarchaeota;_Halobacteria;_Halobacteriales;_Deep_sea_hydrothermal_vent_gp_6(dhveg-6)_None1656	0	0	0	0	0	0	0	0	0	0	0	0	8	0
Arc;_Euryarchaeota;_Halobacteria;_Halobacteriales;_Deep_sea_hydrothermal_vent_gp_6(dhveg-6)_None1658	0	1	0	0	0	0	0	1	3	0	0	1	1	0
Arc;_Euryarchaeota;_Halobacteria;_Halobacteriales;_Deep_sea_hydrothermal_vent_gp_6(dhveg-6)_None1660	0	0	0	0	0	0	0	0	3	0	0	0	2	0
Arc;_Euryarchaeota;_Halobacteria;_Halobacteriales;_Deep_sea_hydrothermal_vent_gp_6(dhveg-6)_None1662	5	2	0	0	2	1	0	0	0	0	0	0	1	0
Arc;_Euryarchaeota;_Halobacteria;_Halobacteriales;_Deep_sea_hydrothermal_vent_gp_6(dhveg-6)_None1666	0	0	0	0	0	0	0	6	0	1	0	0	0	0
Arc;_Euryarchaeota;_Halobacteria;_Halobacteriales;_Deep_sea_hydrothermal_vent_gp_6(dhveg-6)_None1668	0	0	0	0	0	0	0	0	0	1	0	0	0	0
Arc;_Euryarchaeota;_Halobacteria;_Halobacteriales;_Deep_sea_hydrothermal_vent_gp_6(dhveg-6)_None1669	0	0	0	0	0	0	0	2	0	0	0	0	0	0
Arc;_Euryarchaeota;_Halobacteria;_Halobacteriales;_Deep_sea_hydrothermal_vent_gp_6(dhveg-6)_None1671	0	0	0	0	0	0	0	2	0	0	0	0	0	0
Arc;_Euryarchaeota;_Halobacteria;_Halobacteriales;_Deep_sea_hydrothermal_vent_gp_6(dhveg-6)_None1673	0	1	0	0	0	3	0	8	0	0	0	0	0	0
Arc;_Euryarchaeota;_Halobacteria;_Halobacteriales;_Deep_sea_hydrothermal_vent_gp_6(dhveg-6)_None1676	0	0	0	0	0	2	0	3	0	0	0	0	0	0
Arc;_Euryarchaeota;_Halobacteria;_Halobacteriales;_Deep_sea_hydrothermal_vent_gp_6(dhveg-6)_None1678	0	0	0	0	2	0	6	0	1	0	0	1	0	0
Arc;_Euryarchaeota;_Halobacteria;_Halobacteriales;_Deep_sea_hydrothermal_vent_gp_6(dhveg-6)_None168	0	0	0	0	0	0	0	5	0	0	0	0	0	0
Arc;_Euryarchaeota;_Halobacteria;_Halobacteriales;_Deep_sea_hydrothermal_vent_gp_6(dhveg-6)_None1682	0	0	0	0	0	2	0	1	0	0	0	0	0	0
Arc;_Euryarchaeota;_Halobacteria;_Halobacteriales;_Deep_sea_hydrothermal_vent_gp_6(dhveg-6)_None1683	0	0	0	0	0	0	1	0	0	0	0	0	0	0
Arc;_Euryarchaeota;_Halobacteria;_Halobacteriales;_Deep_sea_hydrothermal_vent_gp_6(dhveg-6)_None1684	0	0	0	0	0	0	0	1	0	0	0	0	0	0
Arc;_Euryarchaeota;_Halobacteria;_Halobacteriales;_Deep_sea_hydrothermal_vent_gp_6(dhveg-6)_None1685	2	0	0	0	0	0	0	0	8	0	0	0	12	0
Arc;_Euryarchaeota;_Halobacteria;_Halobacteriales;_Deep_sea_hydrothermal_vent_gp_6(dhveg-6)_None1687	0	0	0	0	0	1	0	0	0	0	0	0	0	0
Arc;_Euryarchaeota;_Halobacteria;_Halobacteriales;_Deep_sea_hydrothermal_vent_gp_6(dhveg-6)_None1688	0	1	0	5	1	4	11	2	0	0	1	0	2	0
Arc;_Euryarchaeota;_Halobacteria;_Halobacteriales;_Deep_sea_hydrothermal_vent_gp_6(dhveg-6)_None169	0	0	0	0	0	3	0	0	0	1	0	0	0	0
Arc;_Euryarchaeota;_Halobacteria;_Halobacteriales;_Deep_sea_hydrothermal_vent_gp_6(dhveg-6)_None1690	0	0	0	0	3	0	0	4	11	0	0	0	8	0
Arc;_Euryarchaeota;_Halobacteria;_Halobacteriales;_Deep_sea_hydrothermal_vent_gp_6(dhveg-6)_None1693	8	0	0	0	3	3	0	0	6	0	0	0	0	0
Arc;_Euryarchaeota;_Halobacteria;_Halobacteriales;_Deep_sea_hydrothermal_vent_gp_6(dhveg-6)_None1694	0	0	0	0	0	3	0	0	0	0	0	0	0	0
Arc;_Euryarchaeota;_Halobacteria;_Halobacteriales;_Deep_sea_hydrothermal_vent_gp_6(dhveg-6)_None1696	0	1	0	0	0	0	0	0	0	0	0	0	0	0
Arc;_Euryarchaeota;_Halobacteria;_Halobacteriales;_Deep_sea_hydrothermal_vent_gp_6(dhveg-6)_None1698	0	0	0	0	1	0	0	0	0	0	0	0	0	0
Arc;_Euryarchaeota;_Halobacteria;_Halobacteriales;_Deep_sea_hydrothermal_vent_gp_6(dhveg-6)_None170	0	0	0	0	0	0	3	7	0	0	0	0	0	0
Arc;_Euryarchaeota;_Halobacteria;_Halobacteriales;_Deep_sea_hydrothermal_vent_gp_6(dhveg-6)_None1700	2	1	0	0	0	0	0	0	0	0	0	0	0	0
Arc;_Euryarchaeota;_Halobacteria;_Halobacteriales;_Deep_sea_hydrothermal_vent_gp_6(dhveg-6)_None1701	0	0	0	0	1	1	0	0	0	0	0	0	1	2
Arc;_Euryarchaeota;_Halobacteria;_Halobacteriales;_Deep_sea_hydrothermal_vent_gp_6(dhveg-6)_None1704	2	0	0	0	0	0	0	1	0	0	0	0	0	0
Arc;_Euryarchaeota;_Halobacteria;_Halobacteriales;_Deep_sea_hydrothermal_vent_gp_6(dhveg-6)_None1707	1	0	0	0	0	0	0	8	8	0	0	0	0	0
Arc;_Euryarchaeota;_Halobacteria;_Halobacteriales;_Deep_sea_hydrothermal_vent_gp_6(dhveg-6)_None1708	0	0	1	0	0	0	0	3	0	1	0	0	0	0
Arc;_Euryarchaeota;_Halobacteria;_Halobacteriales;_Deep_sea_hydrothermal_vent_gp_6(dhveg-6)_None1709	0	0	0	0	0	0	0	4	0	0	0	0	0	0
Arc;_Euryarchaeota;_Halobacteria;_Halobacteriales;_Deep_sea_hydrothermal_vent_gp_6(dhveg-6)_None1710	0	0	0	0	0	0	0	0	0	0	0	0	3	0
Arc;_Euryarchaeota;_Halobacteria;_Halobacteriales;_Deep_sea_hydrothermal_vent_gp_6(dhveg-6)_None1711	0	0	0	0	0	2	0	0	1	0	0	5	1	0
Arc;_Euryarchaeota;_Halobacteria;_Halobacteriales;_Deep_sea_hydrothermal_vent_gp_6(dhveg-6)_None1717	0	0	0	0	0	0	0	0	1	0	0	0	0	0
Arc;_Euryarchaeota;_Halobacteria;_Halobacteriales;_Deep_sea_hydrothermal_vent_gp_6(dhveg-6)_None1719	0	0	0	0	0	0	0	0	3	0	0	0	0	0
Arc;_Euryarchaeota;_Halobacteria;_Halobacteriales;_Deep_sea_hydrothermal_vent_gp_6(dhveg-6)_None172	0	16	0	0	1	1	4	0	2	0	0	0	0	0
Arc;_Euryarchaeota;_Halobacteria;_Halobacteriales;_Deep_sea_hydrothermal_vent_gp_6(dhveg-6)_None1720	0	0	0	0	1	1	0	0	0	0	0	0	0	0
Arc;_Euryarchaeota;_Halobacteria;_Halobacteriales;_Deep_sea_hydrothermal_vent_gp_6(dhveg-6)_None1721	0	0	0	0	0	0	0	0	0	0	0	0	1	0
Arc;_Euryarchaeota;_Halobacteria;_Halobacteriales;_Deep_sea_hydrothermal_vent_gp_6(dhveg-6)_None1722	0	0	0	0	3	0	0	7	4	0	1	0	3	0
Arc;_Euryarchaeota;_Halobacteria;_Halobacteriales;_Deep_sea_hydrothermal_vent_gp_6(dhveg-6)_None1723	0	0	0	0	0	0	0	0	0	1	0	0	0	0
Arc;_Euryarchaeota;_Halobacteria;_Halobacteriales;_Deep_sea_hydrothermal_vent_gp_6(dhveg-6)_None1726	0	0	0	0	0	0	0	0	0	0	0	0	1	0
Arc;_Euryarchaeota;_Halobacteria;_Halobacteriales;_Deep_sea_hydrothermal_vent_gp_6(dhveg-6)_None1727	2	1	0	0	0	4	9	12	0	1	1	0	2	0
Arc;_Euryarchaeota;_Halobacteria;_Halobacteriales;_Deep_sea_hydrothermal_vent_gp_6(dhveg-6)_None1729	0	1	0	0	19	0	0	0	0	0	0	0	0	0
Arc;_Euryarchaeota;_Halobacteria;_Halobacteriales;_Deep_sea_hydrothermal_vent_gp_6(dhveg-6)_None173	0	0	0	0	0	1	7	0	0	1	0	0	0	0
Arc;_Euryarchaeota;_Halobacteria;_Halobacteriales;_Deep_sea_hydrothermal_vent_gp_6(dhveg-6)_None1730	0	0	0	0	0	0	0	0	2	0	0	0	0	0
Arc;_Euryarchaeota;_Halobacteria;_Halobacteriales;_Deep_sea_hydrothermal_vent_gp_6(dhveg-6)_None1732	2	0	0	0	0	1	2	5	7	0	0	0	1	0
Arc;_Euryarchaeota;_Halobacteria;_Halobacteriales;_Deep_sea_hydrothermal_vent_gp_6(dhveg-6)_None1733	0	0	0	0	0	0	0	0	0	0	0	0	1	0
Arc;_Euryarchaeota;_Halobacteria;_Halobacteriales;_Deep_sea_hydrothermal_vent_gp_6(dhveg-6)_None174	0	7	3	4	5	20	49	60	26	39	38	0	20	0
Arc;_Euryarchaeota;_Halobacteria;_Halobacteriales;_Deep_sea_hydrothermal_vent_gp_6(dhveg-6)_None1741	0	0	0	0	0	2	0	25	1	0	1	2	0	0
Arc;_Euryarchaeota;_Halobacteria;_Halobacteriales;_Deep_sea_hydrothermal_vent_gp_6(dhveg-6)_None1743	0	0	0	0	0	0	0	0	1	0	0	0	1	0
Arc;_Euryarchaeota;_Halobacteria;_Halobacteriales;_Deep_sea_hydrothermal_vent_gp_6(dhveg-6)_None1747	0	0	0	0	0	0	0	0	0	0	0	0	3	0
Arc;_Euryarchaeota;_Halobacteria;_Halobacteriales;_Deep_sea_hydrothermal_vent_gp_6(dhveg-6)_None1749	0	0	0	0	0	0	0	0	0	0	0	0	1	0
Arc;_Euryarchaeota;_Halobacteria;_Halobacteriales;_Deep_sea_hydrothermal_vent_gp_6(dhveg-6)_None1750	0	0	0	0	0	0	0	0	0	0	0	0	1	0
Arc;_Euryarchaeota;_Halobacteria;_Halobacteriales;_Deep_sea_hydrothermal_vent_gp_6(dhveg-6)_None1751	1	0	0	0	0	1	0	0	0	0	0	0	0	0
Arc;_Euryarchaeota;_Halobacteria;_Halobacteriales;_Deep_sea_hydrothermal_vent_gp_6(dhveg-6)_None1752	0	0	0	0	0	0	0	0	1	0	0	0	0	0
Arc;_Euryarchaeota;_Halobacteria;_Halobacteriales;_Deep_sea_hydrothermal_vent_gp_6(dhveg-6)_None1755	0	0	0	0	0	0	0	0	0	0	0	0	1	0
Arc;_Euryarchaeota;_Halobacteria;_Halobacteriales;_Deep_sea_hydrothermal_vent_gp_6(dhveg-6)_None1757	0	0	0	0	0	0	0	10	1	0	0	0	0	0
Arc;_Euryarchaeota;_Halobacteria;_Halobacteriales;_Deep_sea_hydrothermal_vent_gp_6(dhveg-6)_None1762	0	0	0	0	0	0	0	1	0	0	0	0	3	0
Arc;_Euryarchaeota;_Halobacteria;_Halobacteriales;_Deep_sea_hydrothermal_vent_gp_6(dhveg-6)_None1763	0	0	0	0	0	0	1	0	0	0	0	0	0	0
Arc;_Euryarchaeota;_Halobacteria;_Halobacteriales;_Deep_sea_hydrothermal_vent_gp_6(dhveg-6)_None1764	1	0	0	0	0	0	0	0	0	0	0	0	0	0
Arc;_Euryarchaeota;_Halobacteria;_Halobacteriales;_Deep_sea_hydrothermal_vent_gp_6(dhveg-6)_None1765	0	0	0	0	0	0	1	0	0	0	1	0	1	0
Arc;_Euryarchaeota;_Halobacteria;_Halobacteriales;_Deep_sea_hydrothermal_vent_gp_6(dhveg-6)_None1766	0	0	0	0	0	0	3	0	1	0	0	0	1	0
Arc;_Euryarchaeota;_Halobacteria;_Halobacteriales;_Deep_sea_hydrothermal_vent_gp_6(dhveg-6)_None1767	0	0	0	0	0	11	18	5	6	7	0	0	7	0
Arc;_Euryarchaeota;_Halobacteria;_Halobacteriales;_Deep_sea_hydrothermal_vent_gp_6(dhveg-6)_None177	0	0	0	0	0	0	0	4	0	2	1	1	0	0
Arc;_Euryarchaeota;_Halobacteria;_Halobacteriales;_Deep_sea_hydrothermal_vent_gp_6(dhveg-6)_None1771	0	0	0	0	0	0	0	5	0	0	0	1	1	0
Arc;_Euryarchaeota;_Halobacteria;_Halobacteriales;_Deep_sea_hydrothermal_vent_gp_6(dhveg-6)_None1772	0	0	2	0	0	0	0	1	2	0	0	0	0	0
Arc;_Euryarchaeota;_Halobacteria;_Halobacteriales;_Deep_sea_hydrothermal_vent_gp_6(dhveg-6)_None1773	0	1	0	0	0	0	2	0	2	1	0	0	1	0
Arc;_Euryarchaeota;_Halobacteria;_Halobacteriales;_Deep_sea_hydrothermal_vent_gp_6(dhveg-6)_None1776	0	0	0	0	0	2	6	0	0	0	0	0	0	0
Arc;_Euryarchaeota;_Halobacteria;_Halobacteriales;_Deep_sea_hydrothermal_vent_gp_6(dhveg-6)_None1777	0	0	0	0	0	0	6	1	0	0	0	0	0	0
Arc;_Euryarchaeota;_Halobacteria;_Halobacteriales;_Deep_sea_hydrothermal_vent_gp_6(dhveg-6)_None1779	0	0	0	0	0	0	0	4	0	0	0	0	0	0
Arc;_Euryarchaeota;_Halobacteria;_Halobacteriales;_Deep_sea_hydrothermal_vent_gp_6(dhveg-6)_None1780	0	0	0	0	0	0	0	0	0	0	0	0	3	0
Arc;_Euryarchaeota;_Halobacteria;_Halobacteriales;_Deep_sea_hydrothermal_vent_gp_6(dhveg-6)_None1783	0	0	0	0	0	0	0	0	0	0	0	0	3	0
Arc;_Euryarchaeota;_Halobacteria;_Halobacteriales;_Deep_sea_hydrothermal_vent_gp_6(dhveg-6)_None1784	0	0	0	0	0	2	0	1	0	6	0	0	1	0
Arc;_Euryarchaeota;_Halobacteria;_Halobacteriales;_Deep_sea_hydrothermal_vent_gp_6(dhveg-6)_None1785	0	2	0	0	0	2	0	0	10	0	0	0	6	0
Arc;_Euryarchaeota;_Halobacteria;_Halobacteriales;_Deep_sea_hydrothermal_vent_gp_6(dhveg-6)_None1786	1	0	0	0	0	0	0	0	3	0	0	0	0	0
Arc;_Euryarchaeota;_Halobacteria;_Halobacteriales;_Deep_sea_hydrothermal_vent_gp_6(dhveg-6)_None1787	0	0	0	0	0	0	0	0	2	0	0	0	0	0
Arc;_Euryarchaeota;_Halobacteria;_Halobacteriales;_Deep_sea_hydrothermal_vent_gp_6(dhveg-6)_None1788	0	0	0	0	0	0	0	0	1	0	0	0	0	0
Arc;_Euryarchaeota;_Halobacteria;_Halobacteriales;_Deep_sea_hydrothermal_vent_gp_6(dhveg-6)_None1789	0	0	0	0	0	2	0	0	0	0	0	0	0	0
Arc;_Euryarchaeota;_Halobacteria;_Halobacteriales;_Deep_sea_hydrothermal_vent_gp_6(dhveg-6)_None179	0	0	0	0	2	0	0	0	0	0	0	0	5	0
Arc;_Euryarchaeota;_Halobacteria;_Halobacteriales;_Deep_sea_hydrothermal_vent_gp_6(dhveg-6)_None1791	0	0	0	0	0	0	0	0	0	0	1	0	0	0
Arc;_Euryarchaeota;_Halobacteria;_Halobacteriales;_Deep_sea_hydrothermal_vent_gp_6(dhveg-6)_None1792	0	0	0	0	0	0	0	0	0	0	0	0	3	0
Arc;_Euryarchaeota;_Halobacteria;_Halobacteriales;_Deep_sea_hydrothermal_vent_gp_6(dhveg-6)_None1794	0	0	0	0	0	0	0	0	0	0	0	0	1	0
Arc;_Euryarchaeota;_Halobacteria;_Halobacteriales;_Deep_sea_hydrothermal_vent_gp_6(dhveg-6)_None1796	0	0	0	0	0	0	0	0	3	0	0	0	0	0
Arc;_Euryarchaeota;_Halobacteria;_Halobacteriales;_Deep_sea_hydrothermal_vent_gp_6(dhveg-6)_None1799	0	0	0	0	0	0	0	0	0	0	0	0	2	0
Arc;_Euryarchaeota;_Halobacteria;_Halobacteriales;_Deep_sea_hydrothermal_vent_gp_6(dhveg-6)_None180	0	0	0	0	0	0	0	0	0	1	0	0	0	0
Arc;_Euryarchaeota;_Halobacteria;_Halobacteriales;_Deep_sea_hydrothermal_vent_gp_6(dhveg-6)_None1802	0	0	0	0	0	0	0	0	0	0	0	0	3	0
Arc;_Euryarchaeota;_Halobacteria;_Halobacteriales;_Deep_sea_hydrothermal_vent_gp_6(dhveg-6)_None1803	0	0	0	0	1	1	5	2	0	0	2	0	0	0
Arc;_Euryarchaeota;_Halobacteria;_Halobacteriales;_Deep_sea_hydrothermal_vent_gp_6(dhveg-6)_None1804	0	0	0	0	0	0	0	0	3	0	0	0	5	0
Arc;_Euryarchaeota;_Halobacteria;_Halobacteriales;_Deep_sea_hydrothermal_vent_gp_6(dhveg-6)_None1806	0	0	0	0	0	0	0	0	0	0	0	0	2	0
Arc;_Euryarchaeota;_Halobacteria;_Halobacteriales;_Deep_sea_hydrothermal_vent_gp_6(dhveg-6)_None1809	0	0	0	0	0	0	0	0	0	1	0	0	0	0
Arc;_Euryarchaeota;_Halobacteria;_Halobacteriales;_Deep_sea_hydrothermal_vent_gp_6(dhveg-6)_None181	0	0	0	0	0	0	0	0	0	0	0	0	1	0
Arc;_Euryarchaeota;_Halobacteria;_Halobacteriales;_Deep_sea_hydrothermal_vent_gp_6(dhveg-6)_None1811	0	0	0	0	0	0	0	1	0	0	0	0	0	0
Arc;_Euryarchaeota;_Halobacteria;_Halobacteriales;_Deep_sea_hydrothermal_vent_gp_6(dhveg-6)_None1814	0	1	0	0	0	0	0	0	0	0	0	0	0	0
Arc;_Euryarchaeota;_Halobacteria;_Halobacteriales;_Deep_sea_hydrothermal_vent_gp_6(dhveg-6)_None1817	10	0	0	0	6	0	0	0	2	0	0	0	11	0
Arc;_Euryarchaeota;_Halobacteria;_Halobacteriales;_Deep_sea_hydrothermal_vent_gp_6(dhveg-6)_None1818	9	6	83	2	11	91	211	1251	141	62	62	75	42	1
Arc;_Euryarchaeota;_Halobacteria;_Halobacteriales;_Deep_sea_hydrothermal_vent_gp_6(dhveg-6)_None1819	0	0	0	0	0	0	0	0	1	0	0	11	8	0
Arc;_Euryarchaeota;_Halobacteria;_Halobacteriales;_Deep_sea_hydrothermal_vent_gp_6(dhveg-6)_None182	0	0	0	0	0	0	0	0	3	0	0	0	3	0
Arc;_Euryarchaeota;_Halobacteria;_Halobacteriales;_Deep_sea_hydrothermal_vent_gp_6(dhveg-6)_None1820	0	1	0	0	0	17	13	0	0	0	0	0	0	0
Arc;_Euryarchaeota;_Halobacteria;_Halobacteriales;_Deep_sea_hydrothermal_vent_gp_6(dhveg-6)_None1826	0	2	0	0	4	1	0	0	0	0	0	0	0	0
Arc;_Euryarchaeota;_Halobacteria;_Halobacteriales;_Deep_sea_hydrothermal_vent_gp_6(dhveg-6)_None1827	0	1	0	0	6	0	0	0	0	0	0	0	1	1
Arc;_Euryarchaeota;_Halobacteria;_Halobacteriales;_Deep_sea_hydrothermal_vent_gp_6(dhveg-6)_None1828	0	0	0	0	0	0	0	0	1	0	0	0	0	0
Arc;_Euryarchaeota;_Halobacteria;_Halobacteriales;_Deep_sea_hydrothermal_vent_gp_6(dhveg-6)_None1830	0	0	8	1	0	0	0	0	2	0	0	0	0	0
Arc;_Euryarchaeota;_Halobacteria;_Halobacteriales;_Deep_sea_hydrothermal_vent_gp_6(dhveg-6)_None1832	2	0	0	0	0	0	0	0	0	0	0	0	4	0
Arc;_Euryarchaeota;_Halobacteria;_Halobacteriales;_Deep_sea_hydrothermal_vent_gp_6(dhveg-6)_None1835	0	6	1	0	1	0	0	13	7	0	4	0	2	0
Arc;_Euryarchaeota;_Halobacteria;_Halobacteriales;_Deep_sea_hydrothermal_vent_gp_6(dhveg-6)_None1836	0	8	0	2	0	5	0	0	0	0	0	0	0	0
Arc;_Euryarchaeota;_Halobacteria;_Halobacteriales;_Deep_sea_hydrothermal_vent_gp_6(dhveg-6)_None1837	0	0	0	0	0	0	0	0	5	0	0	0	8	0
Arc;_Euryarchaeota;_Halobacteria;_Halobacteriales;_Deep_sea_hydrothermal_vent_gp_6(dhveg-6)_None1838	0	0	0	0	0	0	0	1	0	0	0	0	0	0
Arc;_Euryarchaeota;_Halobacteria;_Halobacteriales;_Deep_sea_hydrothermal_vent_gp_6(dhveg-6)_None184	1	0	0	0	0	0	0	4	0	0	0	0	0	0
Arc;_Euryarchaeota;_Halobacteria;_Halobacteriales;_Deep_sea_hydrothermal_vent_gp_6(dhveg-6)_None1840	0	0	0	0	0	0	0	0	2	0	0	0	0	0
Arc;_Euryarchaeota;_Halobacteria;_Halobacteriales;_Deep_sea_hydrothermal_vent_gp_6(dhveg-6)_None1842	0	0	0	0	0	0	0	0	0	0	0	0	1	0
Arc;_Euryarchaeota;_Halobacteria;_Halobacteriales;_Deep_sea_hydrothermal_vent_gp_6(dhveg-6)_None1843	0	0	0	0	0	3	1	0	1	1	1	2	0	0
Arc;_Euryarchaeota;_Halobacteria;_Halobacteriales;_Deep_sea_hydrothermal_vent_gp_6(dhveg-6)_None1844	0	0	0	0	0	0	0	0	1	0	0	0	0	0
Arc;_Euryarchaeota;_Halobacteria;_Halobacteriales;_Deep_sea_hydrothermal_vent_gp_6(dhveg-6)_None1846	0	0	0	0	0	0	0	0	0	0	0	0	0	3
Arc;_Euryarchaeota;_Halobacteria;_Halobacteriales;_Deep_sea_hydrothermal_vent_gp_6(dhveg-6)_None1848	0	0	0	24	0	0	0	0	0	0	0	0	0	0
Arc;_Euryarchaeota;_Halobacteria;_Halobacteriales;_Deep_sea_hydrothermal_vent_gp_6(dhveg-6)_None1849	0	1	0	0	0	1	0	0	0	0	0	0	1	0
Arc;_Euryarchaeota;_Halobacteria;_Halobacteriales;_Deep_sea_hydrothermal_vent_gp_6(dhveg-6)_None1855	0	0	0	0	0	0	0	0	8	0	0	0	3	0
Arc;_Euryarchaeota;_Halobacteria;_Halobacteriales;_Deep_sea_hydrothermal_vent_gp_6(dhveg-6)_None1858	0	5	6	0	13	7	13	4	9	2	0	0	5	0
Arc;_Euryarchaeota;_Halobacteria;_Halobacteriales;_Deep_sea_hydrothermal_vent_gp_6(dhveg-6)_None1859	0	0	0	0	0	1	0	2	0	1	1	0	0	0
Arc;_Euryarchaeota;_Halobacteria;_Halobacteriales;_Deep_sea_hydrothermal_vent_gp_6(dhveg-6)_None186	0	0	0	0	0	0	0	1	0	0	0	0	0	0
Arc;_Euryarchaeota;_Halobacteria;_Halobacteriales;_Deep_sea_hydrothermal_vent_gp_6(dhveg-6)_None1860	13	5	9	0	7	27	54	63	6	19	1	0	8	1
Arc;_Euryarchaeota;_Halobacteria;_Halobacteriales;_Deep_sea_hydrothermal_vent_gp_6(dhveg-6)_None1861	0	0	0	0	0	0	0	1	0	0	0	0	0	0
Arc;_Euryarchaeota;_Halobacteria;_Halobacteriales;_Deep_sea_hydrothermal_vent_gp_6(dhveg-6)_None1862	0	0	0	0	0	0	0	0	1	0	0	0	0	0
Arc;_Euryarchaeota;_Halobacteria;_Halobacteriales;_Deep_sea_hydrothermal_vent_gp_6(dhveg-6)_None1863	0	0	0	0	0	0	0	1	0	0	0	0	0	0
Arc;_Euryarchaeota;_Halobacteria;_Halobacteriales;_Deep_sea_hydrothermal_vent_gp_6(dhveg-6)_None1864	0	0	0	0	1	1	7	0	0	1	0	0	1	0
Arc;_Euryarchaeota;_Halobacteria;_Halobacteriales;_Deep_sea_hydrothermal_vent_gp_6(dhveg-6)_None1866	0	0	0	0	0	0	0	0	3	0	0	0	2	0
Arc;_Euryarchaeota;_Halobacteria;_Halobacteriales;_Deep_sea_hydrothermal_vent_gp_6(dhveg-6)_None1869	0	0	0	0	0	32	0	0	1	0	0	0	4	0
Arc;_Euryarchaeota;_Halobacteria;_Halobacteriales;_Deep_sea_hydrothermal_vent_gp_6(dhveg-6)_None187	0	0	0	0	2	0	0	0	0	0	0	0	0	0
Arc;_Euryarchaeota;_Halobacteria;_Halobacteriales;_Deep_sea_hydrothermal_vent_gp_6(dhveg-6)_None1870	0	0	0	0	0	3	0	0	0	0	0	0	0	0
Arc;_Euryarchaeota;_Halobacteria;_Halobacteriales;_Deep_sea_hydrothermal_vent_gp_6(dhveg-6)_None1874	0	2	0	0	0	0	0	0	0	0	0	0	0	0
Arc;_Euryarchaeota;_Halobacteria;_Halobacteriales;_Deep_sea_hydrothermal_vent_gp_6(dhveg-6)_None1875	0	0	0	0	0	0	1	0	0	0	0	0	0	0
Arc;_Euryarchaeota;_Halobacteria;_Halobacteriales;_Deep_sea_hydrothermal_vent_gp_6(dhveg-6)_None1876	0	0	2	0	1	2	13	2	2	0	3	3	1	0
Arc;_Euryarchaeota;_Halobacteria;_Halobacteriales;_Deep_sea_hydrothermal_vent_gp_6(dhveg-6)_None1878	0	0	0	0	0	0	0	0	2	0	0	0	0	0
Arc;_Euryarchaeota;_Halobacteria;_Halobacteriales;_Deep_sea_hydrothermal_vent_gp_6(dhveg-6)_None1879	4	0	0	0	0	0	0	0	0	0	0	2	0	0
Arc;_Euryarchaeota;_Halobacteria;_Halobacteriales;_Deep_sea_hydrothermal_vent_gp_6(dhveg-6)_None188	0	0	2	1	3	23	17	52	20	8	5	0	13	0
Arc;_Euryarchaeota;_Halobacteria;_Halobacteriales;_Deep_sea_hydrothermal_vent_gp_6(dhveg-6)_None1880	0	0	0	0	0	0	0	0	0	0	0	0	2	0
Arc;_Euryarchaeota;_Halobacteria;_Halobacteriales;_Deep_sea_hydrothermal_vent_gp_6(dhveg-6)_None1883	0	0	0	0	1	1	0	1	1	0	0	0	0	0
Arc;_Euryarchaeota;_Halobacteria;_Halobacteriales;_Deep_sea_hydrothermal_vent_gp_6(dhveg-6)_None1884	0	0	0	0	0	1	0	0	8	0	0	0	0	0
Arc;_Euryarchaeota;_Halobacteria;_Halobacteriales;_Deep_sea_hydrothermal_vent_gp_6(dhveg-6)_None1886	0	0	0	0	2	0	0	0	0	0	0	0	0	0
Arc;_Euryarchaeota;_Halobacteria;_Halobacteriales;_Deep_sea_hydrothermal_vent_gp_6(dhveg-6)_None1887	0	0	0	0	0	0	0	0	0	0	0	0	1	0
Arc;_Euryarchaeota;_Halobacteria;_Halobacteriales;_Deep_sea_hydrothermal_vent_gp_6(dhveg-6)_None1888	0	0	0	0	0	1	0	0	0	0	0	0	0	0
Arc;_Euryarchaeota;_Halobacteria;_Halobacteriales;_Deep_sea_hydrothermal_vent_gp_6(dhveg-6)_None189	0	3	0	0	0	0	0	3	0	0	0	0	0	0
Arc;_Euryarchaeota;_Halobacteria;_Halobacteriales;_Deep_sea_hydrothermal_vent_gp_6(dhveg-6)_None1890	0	1	0	0	0	0	0	0	0	0	0	0	0	0
Arc;_Euryarchaeota;_Halobacteria;_Halobacteriales;_Deep_sea_hydrothermal_vent_gp_6(dhveg-6)_None1893	0	0	0	0	0	0	0	0	1	0	0	0	0	0
Arc;_Euryarchaeota;_Halobacteria;_Halobacteriales;_Deep_sea_hydrothermal_vent_gp_6(dhveg-6)_None1894	0	0	0	0	0	2	0	0	0	0	0	0	0	0
Arc;_Euryarchaeota;_Halobacteria;_Halobacteriales;_Deep_sea_hydrothermal_vent_gp_6(dhveg-6)_None1897	0	0	0	0	0	0	0	0	4	0	0	0	5	0
Arc;_Euryarchaeota;_Halobacteria;_Halobacteriales;_Deep_sea_hydrothermal_vent_gp_6(dhveg-6)_None1899	0	1	0	0	0	0	0	0	0	0	0	0	0	0
Arc;_Euryarchaeota;_Halobacteria;_Halobacteriales;_Deep_sea_hydrothermal_vent_gp_6(dhveg-6)_None19	1	6	0	0	4	3	0	1	4	0	0	0	8	0
Arc;_Euryarchaeota;_Halobacteria;_Halobacteriales;_Deep_sea_hydrothermal_vent_gp_6(dhveg-6)_None190	0	0	0	0	0	0	0	0	0	0	0	0	1	0
Arc;_Euryarchaeota;_Halobacteria;_Halobacteriales;_Deep_sea_hydrothermal_vent_gp_6(dhveg-6)_None1902	0	0	0	0	0	0	0	0	3	0	0	10	0	0
Arc;_Euryarchaeota;_Halobacteria;_Halobacteriales;_Deep_sea_hydrothermal_vent_gp_6(dhveg-6)_None1903	0	0	0	0	0	0	0	0	0	0	0	0	1	0
Arc;_Euryarchaeota;_Halobacteria;_Halobacteriales;_Deep_sea_hydrothermal_vent_gp_6(dhveg-6)_None1905	0	0	0	0	0	3	0	0	0	0	0	0	0	0
Arc;_Euryarchaeota;_Halobacteria;_Halobacteriales;_Deep_sea_hydrothermal_vent_gp_6(dhveg-6)_None1906	1	34	0	0	5	0	0	0	0	0	0	0	0	0
Arc;_Euryarchaeota;_Halobacteria;_Halobacteriales;_Deep_sea_hydrothermal_vent_gp_6(dhveg-6)_None1909	0	0	1	9	0	7	0	0	0	0	0	0	1	0
Arc;_Euryarchaeota;_Halobacteria;_Halobacteriales;_Deep_sea_hydrothermal_vent_gp_6(dhveg-6)_None191	0	0	0	0	0	14	4	2	0	0	0	0	0	0
Arc;_Euryarchaeota;_Halobacteria;_Halobacteriales;_Deep_sea_hydrothermal_vent_gp_6(dhveg-6)_None1910	0	4	1	0	2	4	6	1	3	0	0	0	0	0
Arc;_Euryarchaeota;_Halobacteria;_Halobacteriales;_Deep_sea_hydrothermal_vent_gp_6(dhveg-6)_None1912	0	0	0	0	1	0	1	3	3	0	0	0	0	0
Arc;_Euryarchaeota;_Halobacteria;_Halobacteriales;_Deep_sea_hydrothermal_vent_gp_6(dhveg-6)_None1913	0	1	1	0	0	0	0	14	0	0	0	0	0	0
Arc;_Euryarchaeota;_Halobacteria;_Halobacteriales;_Deep_sea_hydrothermal_vent_gp_6(dhveg-6)_None1914	0	0	0	0	0	1	0	0	0	0	0	0	0	0
Arc;_Euryarchaeota;_Halobacteria;_Halobacteriales;_Deep_sea_hydrothermal_vent_gp_6(dhveg-6)_None1916	0	0	0	0	0	3	2	0	2	0	0	0	0	0
Arc;_Euryarchaeota;_Halobacteria;_Halobacteriales;_Deep_sea_hydrothermal_vent_gp_6(dhveg-6)_None1917	0	0	0	0	0	1	3	0	0	1	2	1	0	0
Arc;_Euryarchaeota;_Halobacteria;_Halobacteriales;_Deep_sea_hydrothermal_vent_gp_6(dhveg-6)_None1918	0	0	0	0	0	6	0	2	0	2	5	0	2	0
Arc;_Euryarchaeota;_Halobacteria;_Halobacteriales;_Deep_sea_hydrothermal_vent_gp_6(dhveg-6)_None192	0	0	0	0	0	0	0	4	0	0	0	0	0	0
Arc;_Euryarchaeota;_Halobacteria;_Halobacteriales;_Deep_sea_hydrothermal_vent_gp_6(dhveg-6)_None1921	0	0	0	0	0	0	0	0	1	0	0	0	0	0
Arc;_Euryarchaeota;_Halobacteria;_Halobacteriales;_Deep_sea_hydrothermal_vent_gp_6(dhveg-6)_None1926	8	0	0	4	6	0	0	0	47	1	0	0	89	0
Arc;_Euryarchaeota;_Halobacteria;_Halobacteriales;_Deep_sea_hydrothermal_vent_gp_6(dhveg-6)_None1929	0	0	0	0	0	0	4	0	0	0	0	3	0	0
Arc;_Euryarchaeota;_Halobacteria;_Halobacteriales;_Deep_sea_hydrothermal_vent_gp_6(dhveg-6)_None1930	0	1	0	0	0	0	0	0	0	0	0	0	0	0
Arc;_Euryarchaeota;_Halobacteria;_Halobacteriales;_Deep_sea_hydrothermal_vent_gp_6(dhveg-6)_None1931	1	0	0	0	0	0	0	0	1	1	0	0	0	0
Arc;_Euryarchaeota;_Halobacteria;_Halobacteriales;_Deep_sea_hydrothermal_vent_gp_6(dhveg-6)_None1932	0	0	0	0	0	0	0	1	0	0	0	0	0	0
Arc;_Euryarchaeota;_Halobacteria;_Halobacteriales;_Deep_sea_hydrothermal_vent_gp_6(dhveg-6)_None1933	0	2	0	0	0	0	0	0	1	0	0	3	1	0
Arc;_Euryarchaeota;_Halobacteria;_Halobacteriales;_Deep_sea_hydrothermal_vent_gp_6(dhveg-6)_None1934	1	0	0	0	1	0	0	0	2	0	0	0	1	0
Arc;_Euryarchaeota;_Halobacteria;_Halobacteriales;_Deep_sea_hydrothermal_vent_gp_6(dhveg-6)_None1936	0	0	0	0	4	15	0	0	4	0	0	0	0	0
Arc;_Euryarchaeota;_Halobacteria;_Halobacteriales;_Deep_sea_hydrothermal_vent_gp_6(dhveg-6)_None1938	0	0	0	10	3	0	0	0	0	0	0	0	0	0
Arc;_Euryarchaeota;_Halobacteria;_Halobacteriales;_Deep_sea_hydrothermal_vent_gp_6(dhveg-6)_None1939	0	0	0	0	2	0	0	0	0	0	0	0	1	0
Arc;_Euryarchaeota;_Halobacteria;_Halobacteriales;_Deep_sea_hydrothermal_vent_gp_6(dhveg-6)_None194	0	0	0	0	1	0	0	0	0	0	0	0	0	0
Arc;_Euryarchaeota;_Halobacteria;_Halobacteriales;_Deep_sea_hydrothermal_vent_gp_6(dhveg-6)_None1941	0	0	0	0	0	0	0	1	0	0	0	0	0	0
Arc;_Euryarchaeota;_Halobacteria;_Halobacteriales;_Deep_sea_hydrothermal_vent_gp_6(dhveg-6)_None1943	0	0	0	0	0	0	0	0	0	0	0	0	3	0
Arc;_Euryarchaeota;_Halobacteria;_Halobacteriales;_Deep_sea_hydrothermal_vent_gp_6(dhveg-6)_None1947	0	0	1	0	0	19	0	14	5	3	3	2	8	0
Arc;_Euryarchaeota;_Halobacteria;_Halobacteriales;_Deep_sea_hydrothermal_vent_gp_6(dhveg-6)_None1948	0	0	0	0	1	0	0	0	0	0	0	0	0	0
Arc;_Euryarchaeota;_Halobacteria;_Halobacteriales;_Deep_sea_hydrothermal_vent_gp_6(dhveg-6)_None1949	0	0	0	0	0	1	0	0	0	0	0	0	0	0
Arc;_Euryarchaeota;_Halobacteria;_Halobacteriales;_Deep_sea_hydrothermal_vent_gp_6(dhveg-6)_None195	0	0	0	0	0	0	0	2	0	0	0	0	0	0
Arc;_Euryarchaeota;_Halobacteria;_Halobacteriales;_Deep_sea_hydrothermal_vent_gp_6(dhveg-6)_None1952	0	5	4	0	16	20	38	30	31	11	5	3	8	2
Arc;_Euryarchaeota;_Halobacteria;_Halobacteriales;_Deep_sea_hydrothermal_vent_gp_6(dhveg-6)_None1954	0	0	0	0	2	0	0	0	0	0	0	0	2	0
Arc;_Euryarchaeota;_Halobacteria;_Halobacteriales;_Deep_sea_hydrothermal_vent_gp_6(dhveg-6)_None1959	0	19	0	0	2	0	0	0	0	0	0	0	0	0
Arc;_Euryarchaeota;_Halobacteria;_Halobacteriales;_Deep_sea_hydrothermal_vent_gp_6(dhveg-6)_None196	0	0	0	0	0	0	1	0	0	0	0	0	0	0
Arc;_Euryarchaeota;_Halobacteria;_Halobacteriales;_Deep_sea_hydrothermal_vent_gp_6(dhveg-6)_None1960	0	0	0	1	0	0	0	2	0	0	0	0	0	0
Arc;_Euryarchaeota;_Halobacteria;_Halobacteriales;_Deep_sea_hydrothermal_vent_gp_6(dhveg-6)_None1961	0	0	0	0	0	0	0	4	0	0	0	0	0	0
Arc;_Euryarchaeota;_Halobacteria;_Halobacteriales;_Deep_sea_hydrothermal_vent_gp_6(dhveg-6)_None1962	4	24	1	0	1	9	28	9	30	2	2	3	14	1
Arc;_Euryarchaeota;_Halobacteria;_Halobacteriales;_Deep_sea_hydrothermal_vent_gp_6(dhveg-6)_None1966	0	0	0	0	0	0	0	2	0	0	0	0	0	0
Arc;_Euryarchaeota;_Halobacteria;_Halobacteriales;_Deep_sea_hydrothermal_vent_gp_6(dhveg-6)_None1968	0	0	0	0	0	1	5	55	2	1	4	1	0	0
Arc;_Euryarchaeota;_Halobacteria;_Halobacteriales;_Deep_sea_hydrothermal_vent_gp_6(dhveg-6)_None1970	0	1	0	0	0	0	0	0	0	0	0	0	0	0
Arc;_Euryarchaeota;_Halobacteria;_Halobacteriales;_Deep_sea_hydrothermal_vent_gp_6(dhveg-6)_None1973	0	0	0	0	0	0	0	0	0	0	0	0	5	0
Arc;_Euryarchaeota;_Halobacteria;_Halobacteriales;_Deep_sea_hydrothermal_vent_gp_6(dhveg-6)_None1975	0	1	0	0	0	0	0	0	0	0	0	0	0	0
Arc;_Euryarchaeota;_Halobacteria;_Halobacteriales;_Deep_sea_hydrothermal_vent_gp_6(dhveg-6)_None1976	0	0	0	0	0	0	0	2	4	0	0	0	0	0
Arc;_Euryarchaeota;_Halobacteria;_Halobacteriales;_Deep_sea_hydrothermal_vent_gp_6(dhveg-6)_None1977	0	0	0	0	0	2	0	0	0	0	0	0	0	0
Arc;_Euryarchaeota;_Halobacteria;_Halobacteriales;_Deep_sea_hydrothermal_vent_gp_6(dhveg-6)_None1978	0	0	0	0	0	1	1	0	0	0	0	1	0	0
Arc;_Euryarchaeota;_Halobacteria;_Halobacteriales;_Deep_sea_hydrothermal_vent_gp_6(dhveg-6)_None1979	0	0	0	0	0	0	0	1	0	0	0	0	0	0
Arc;_Euryarchaeota;_Halobacteria;_Halobacteriales;_Deep_sea_hydrothermal_vent_gp_6(dhveg-6)_None1980	0	0	0	0	1	0	0	0	0	0	0	0	0	0
Arc;_Euryarchaeota;_Halobacteria;_Halobacteriales;_Deep_sea_hydrothermal_vent_gp_6(dhveg-6)_None1981	0	0	0	0	0	0	0	0	0	0	0	8	0	0
Arc;_Euryarchaeota;_Halobacteria;_Halobacteriales;_Deep_sea_hydrothermal_vent_gp_6(dhveg-6)_None1982	0	0	0	0	0	0	1	0	0	0	0	0	0	0
Arc;_Euryarchaeota;_Halobacteria;_Halobacteriales;_Deep_sea_hydrothermal_vent_gp_6(dhveg-6)_None1984	0	0	0	0	0	0	0	3	0	0	0	0	0	0
Arc;_Euryarchaeota;_Halobacteria;_Halobacteriales;_Deep_sea_hydrothermal_vent_gp_6(dhveg-6)_None1985	0	0	1	0	0	0	0	0	0	0	0	0	0	0
Arc;_Euryarchaeota;_Halobacteria;_Halobacteriales;_Deep_sea_hydrothermal_vent_gp_6(dhveg-6)_None1986	0	0	0	0	0	0	0	0	0	0	0	0	3	0
Arc;_Euryarchaeota;_Halobacteria;_Halobacteriales;_Deep_sea_hydrothermal_vent_gp_6(dhveg-6)_None1987	0	0	4	0	0	0	0	0	0	0	0	0	0	0
Arc;_Euryarchaeota;_Halobacteria;_Halobacteriales;_Deep_sea_hydrothermal_vent_gp_6(dhveg-6)_None1989	0	0	1	0	0	8	0	0	9	0	0	0	0	1
Arc;_Euryarchaeota;_Halobacteria;_Halobacteriales;_Deep_sea_hydrothermal_vent_gp_6(dhveg-6)_None199	0	3	0	0	5	3	7	3	4	0	0	0	3	0
Arc;_Euryarchaeota;_Halobacteria;_Halobacteriales;_Deep_sea_hydrothermal_vent_gp_6(dhveg-6)_None1991	0	1	0	0	3	0	0	0	11	0	0	0	20	1
Arc;_Euryarchaeota;_Halobacteria;_Halobacteriales;_Deep_sea_hydrothermal_vent_gp_6(dhveg-6)_None1992	4	5	0	2	1	67	13	44	49	28	6	0	15	0
Arc;_Euryarchaeota;_Halobacteria;_Halobacteriales;_Deep_sea_hydrothermal_vent_gp_6(dhveg-6)_None1994	0	0	0	0	0	0	0	0	0	0	0	0	1	0
Arc;_Euryarchaeota;_Halobacteria;_Halobacteriales;_Deep_sea_hydrothermal_vent_gp_6(dhveg-6)_None1999	0	8	0	5	3	0	0	0	2	0	0	0	0	0
Arc;_Euryarchaeota;_Halobacteria;_Halobacteriales;_Deep_sea_hydrothermal_vent_gp_6(dhveg-6)_None20	0	0	0	0	0	0	0	0	0	0	0	0	1	0
Arc;_Euryarchaeota;_Halobacteria;_Halobacteriales;_Deep_sea_hydrothermal_vent_gp_6(dhveg-6)_None2000	0	0	0	0	0	0	0	0	0	0	0	0	1	0
Arc;_Euryarchaeota;_Halobacteria;_Halobacteriales;_Deep_sea_hydrothermal_vent_gp_6(dhveg-6)_None2001	0	0	0	0	0	0	0	0	0	0	0	0	7	0
Arc;_Euryarchaeota;_Halobacteria;_Halobacteriales;_Deep_sea_hydrothermal_vent_gp_6(dhveg-6)_None2002	0	0	0	0	0	0	1	0	0	0	0	0	0	0
Arc;_Euryarchaeota;_Halobacteria;_Halobacteriales;_Deep_sea_hydrothermal_vent_gp_6(dhveg-6)_None2003	7	6	0	2	2	24	0	0	4	10	0	0	0	0
Arc;_Euryarchaeota;_Halobacteria;_Halobacteriales;_Deep_sea_hydrothermal_vent_gp_6(dhveg-6)_None2004	1	0	0	0	0	14	0	0	7	0	0	0	2	2
Arc;_Euryarchaeota;_Halobacteria;_Halobacteriales;_Deep_sea_hydrothermal_vent_gp_6(dhveg-6)_None2006	0	0	0	0	0	0	0	3	0	0	0	0	1	0
Arc;_Euryarchaeota;_Halobacteria;_Halobacteriales;_Deep_sea_hydrothermal_vent_gp_6(dhveg-6)_None2007	0	0	0	0	0	6	0	0	2	0	0	0	0	1
Arc;_Euryarchaeota;_Halobacteria;_Halobacteriales;_Deep_sea_hydrothermal_vent_gp_6(dhveg-6)_None2008	0	0	0	0	0	0	0	1	0	0	0	0	0	0
Arc;_Euryarchaeota;_Halobacteria;_Halobacteriales;_Deep_sea_hydrothermal_vent_gp_6(dhveg-6)_None2010	0	1	0	0	0	1	0	0	0	0	0	0	0	0
Arc;_Euryarchaeota;_Halobacteria;_Halobacteriales;_Deep_sea_hydrothermal_vent_gp_6(dhveg-6)_None2011	1	0	0	0	1	3	3	8	1	8	0	0	2	0
Arc;_Euryarchaeota;_Halobacteria;_Halobacteriales;_Deep_sea_hydrothermal_vent_gp_6(dhveg-6)_None2012	0	0	0	0	0	0	0	5	0	0	0	0	0	0
Arc;_Euryarchaeota;_Halobacteria;_Halobacteriales;_Deep_sea_hydrothermal_vent_gp_6(dhveg-6)_None2013	0	0	0	0	0	0	0	0	4	0	0	0	0	0
Arc;_Euryarchaeota;_Halobacteria;_Halobacteriales;_Deep_sea_hydrothermal_vent_gp_6(dhveg-6)_None2016	0	0	1	0	0	0	0	0	0	0	0	0	0	0
Arc;_Euryarchaeota;_Halobacteria;_Halobacteriales;_Deep_sea_hydrothermal_vent_gp_6(dhveg-6)_None2017	0	0	0	0	0	0	0	0	0	0	0	0	1	0
Arc;_Euryarchaeota;_Halobacteria;_Halobacteriales;_Deep_sea_hydrothermal_vent_gp_6(dhveg-6)_None2018	0	0	0	4	2	3	0	0	0	0	0	0	0	0
Arc;_Euryarchaeota;_Halobacteria;_Halobacteriales;_Deep_sea_hydrothermal_vent_gp_6(dhveg-6)_None2021	0	11	4	0	0	26	13	47	4	1	2	0	7	0
Arc;_Euryarchaeota;_Halobacteria;_Halobacteriales;_Deep_sea_hydrothermal_vent_gp_6(dhveg-6)_None2023	0	0	0	0	1	0	0	0	0	0	0	0	0	0
Arc;_Euryarchaeota;_Halobacteria;_Halobacteriales;_Deep_sea_hydrothermal_vent_gp_6(dhveg-6)_None2025	0	0	0	0	0	0	0	1	0	4	0	0	1	0
Arc;_Euryarchaeota;_Halobacteria;_Halobacteriales;_Deep_sea_hydrothermal_vent_gp_6(dhveg-6)_None2026	0	3	0	0	3	12	3	2	0	0	0	0	0	0
Arc;_Euryarchaeota;_Halobacteria;_Halobacteriales;_Deep_sea_hydrothermal_vent_gp_6(dhveg-6)_None2027	0	0	0	0	0	0	0	1	0	0	0	0	0	0
Arc;_Euryarchaeota;_Halobacteria;_Halobacteriales;_Deep_sea_hydrothermal_vent_gp_6(dhveg-6)_None2028	0	0	0	0	0	0	0	0	0	0	0	0	1	0
Arc;_Euryarchaeota;_Halobacteria;_Halobacteriales;_Deep_sea_hydrothermal_vent_gp_6(dhveg-6)_None2029	0	0	0	0	1	0	0	0	0	0	0	0	0	0
Arc;_Euryarchaeota;_Halobacteria;_Halobacteriales;_Deep_sea_hydrothermal_vent_gp_6(dhveg-6)_None2031	1	0	0	0	0	0	0	0	1	0	0	0	0	0
Arc;_Euryarchaeota;_Halobacteria;_Halobacteriales;_Deep_sea_hydrothermal_vent_gp_6(dhveg-6)_None2032	0	2	0	0	6	0	0	0	0	0	0	0	0	0
Arc;_Euryarchaeota;_Halobacteria;_Halobacteriales;_Deep_sea_hydrothermal_vent_gp_6(dhveg-6)_None2034	0	0	0	0	1	0	0	0	0	0	0	0	0	0
Arc;_Euryarchaeota;_Halobacteria;_Halobacteriales;_Deep_sea_hydrothermal_vent_gp_6(dhveg-6)_None2038	0	0	0	0	0	0	0	0	0	0	0	0	1	0
Arc;_Euryarchaeota;_Halobacteria;_Halobacteriales;_Deep_sea_hydrothermal_vent_gp_6(dhveg-6)_None2039	0	0	0	0	0	3	0	0	0	0	0	0	0	0
Arc;_Euryarchaeota;_Halobacteria;_Halobacteriales;_Deep_sea_hydrothermal_vent_gp_6(dhveg-6)_None204	0	0	0	0	1	0	0	4	5	0	0	0	9	0
Arc;_Euryarchaeota;_Halobacteria;_Halobacteriales;_Deep_sea_hydrothermal_vent_gp_6(dhveg-6)_None2041	1	0	0	0	0	3	0	1	0	0	0	0	0	0
Arc;_Euryarchaeota;_Halobacteria;_Halobacteriales;_Deep_sea_hydrothermal_vent_gp_6(dhveg-6)_None2042	0	10	0	0	1	4	0	17	1	0	1	0	0	0
Arc;_Euryarchaeota;_Halobacteria;_Halobacteriales;_Deep_sea_hydrothermal_vent_gp_6(dhveg-6)_None2043	2	0	0	0	0	1	0	2	1	0	0	0	0	0
Arc;_Euryarchaeota;_Halobacteria;_Halobacteriales;_Deep_sea_hydrothermal_vent_gp_6(dhveg-6)_None2045	0	0	0	0	0	1	0	0	0	0	0	0	0	0
Arc;_Euryarchaeota;_Halobacteria;_Halobacteriales;_Deep_sea_hydrothermal_vent_gp_6(dhveg-6)_None2046	1	15	242	15	0	7	32	140	13	2	24	12	9	2
Arc;_Euryarchaeota;_Halobacteria;_Halobacteriales;_Deep_sea_hydrothermal_vent_gp_6(dhveg-6)_None2048	0	1	0	0	0	1	0	0	0	1	0	0	1	0
Arc;_Euryarchaeota;_Halobacteria;_Halobacteriales;_Deep_sea_hydrothermal_vent_gp_6(dhveg-6)_None2049	0	0	0	0	0	0	0	0	0	0	0	0	1	0
Arc;_Euryarchaeota;_Halobacteria;_Halobacteriales;_Deep_sea_hydrothermal_vent_gp_6(dhveg-6)_None205	0	0	0	0	0	0	0	0	0	0	0	0	1	0
Arc;_Euryarchaeota;_Halobacteria;_Halobacteriales;_Deep_sea_hydrothermal_vent_gp_6(dhveg-6)_None2050	0	0	0	0	0	2	0	0	0	0	0	0	0	0
Arc;_Euryarchaeota;_Halobacteria;_Halobacteriales;_Deep_sea_hydrothermal_vent_gp_6(dhveg-6)_None2052	0	0	0	0	0	0	0	0	0	0	0	0	1	0
Arc;_Euryarchaeota;_Halobacteria;_Halobacteriales;_Deep_sea_hydrothermal_vent_gp_6(dhveg-6)_None2053	6	0	0	0	0	0	0	0	0	0	0	0	0	0
Arc;_Euryarchaeota;_Halobacteria;_Halobacteriales;_Deep_sea_hydrothermal_vent_gp_6(dhveg-6)_None2057	0	0	0	2	0	1	5	3	10	2	0	0	0	0
Arc;_Euryarchaeota;_Halobacteria;_Halobacteriales;_Deep_sea_hydrothermal_vent_gp_6(dhveg-6)_None2058	0	0	0	1	0	0	0	0	0	0	0	0	0	0
Arc;_Euryarchaeota;_Halobacteria;_Halobacteriales;_Deep_sea_hydrothermal_vent_gp_6(dhveg-6)_None206	0	0	0	0	0	0	14	0	1	0	0	0	0	0
Arc;_Euryarchaeota;_Halobacteria;_Halobacteriales;_Deep_sea_hydrothermal_vent_gp_6(dhveg-6)_None2061	0	0	0	0	0	0	0	0	0	0	0	0	1	0
Arc;_Euryarchaeota;_Halobacteria;_Halobacteriales;_Deep_sea_hydrothermal_vent_gp_6(dhveg-6)_None2062	0	0	0	0	0	1	0	0	0	0	0	0	0	0
Arc;_Euryarchaeota;_Halobacteria;_Halobacteriales;_Deep_sea_hydrothermal_vent_gp_6(dhveg-6)_None2063	0	0	0	0	0	0	0	0	0	0	0	0	1	0
Arc;_Euryarchaeota;_Halobacteria;_Halobacteriales;_Deep_sea_hydrothermal_vent_gp_6(dhveg-6)_None2064	3	0	0	3	19	0	4	8	4	2	0	6	20	2
Arc;_Euryarchaeota;_Halobacteria;_Halobacteriales;_Deep_sea_hydrothermal_vent_gp_6(dhveg-6)_None2065	0	1	0	0	0	0	0	0	0	0	0	0	0	0
Arc;_Euryarchaeota;_Halobacteria;_Halobacteriales;_Deep_sea_hydrothermal_vent_gp_6(dhveg-6)_None2067	0	0	0	0	0	0	0	0	0	0	2	0	0	0
Arc;_Euryarchaeota;_Halobacteria;_Halobacteriales;_Deep_sea_hydrothermal_vent_gp_6(dhveg-6)_None2069	1	0	1	0	0	0	0	0	0	0	0	0	0	0
Arc;_Euryarchaeota;_Halobacteria;_Halobacteriales;_Deep_sea_hydrothermal_vent_gp_6(dhveg-6)_None207	0	0	0	0	0	0	0	1	0	0	0	0	0	0
Arc;_Euryarchaeota;_Halobacteria;_Halobacteriales;_Deep_sea_hydrothermal_vent_gp_6(dhveg-6)_None2071	0	0	0	0	0	4	0	0	0	0	0	0	0	0
Arc;_Euryarchaeota;_Halobacteria;_Halobacteriales;_Deep_sea_hydrothermal_vent_gp_6(dhveg-6)_None2072	0	0	0	0	0	0	0	0	0	0	0	0	1	0
Arc;_Euryarchaeota;_Halobacteria;_Halobacteriales;_Deep_sea_hydrothermal_vent_gp_6(dhveg-6)_None2073	0	0	0	0	0	0	0	3	1	0	0	0	3	0
Arc;_Euryarchaeota;_Halobacteria;_Halobacteriales;_Deep_sea_hydrothermal_vent_gp_6(dhveg-6)_None2075	0	0	0	0	0	0	2	0	0	0	0	0	0	0
Arc;_Euryarchaeota;_Halobacteria;_Halobacteriales;_Deep_sea_hydrothermal_vent_gp_6(dhveg-6)_None2079	0	0	0	0	0	6	0	0	0	0	0	0	0	0
Arc;_Euryarchaeota;_Halobacteria;_Halobacteriales;_Deep_sea_hydrothermal_vent_gp_6(dhveg-6)_None208	0	0	0	0	0	0	0	0	0	0	0	0	1	0
Arc;_Euryarchaeota;_Halobacteria;_Halobacteriales;_Deep_sea_hydrothermal_vent_gp_6(dhveg-6)_None2080	0	0	0	0	0	0	0	0	0	0	0	0	1	0
Arc;_Euryarchaeota;_Halobacteria;_Halobacteriales;_Deep_sea_hydrothermal_vent_gp_6(dhveg-6)_None2081	0	17	0	0	2	0	0	0	0	0	0	0	3	0
Arc;_Euryarchaeota;_Halobacteria;_Halobacteriales;_Deep_sea_hydrothermal_vent_gp_6(dhveg-6)_None2082	5	0	0	0	0	0	0	2	9	0	0	0	4	0
Arc;_Euryarchaeota;_Halobacteria;_Halobacteriales;_Deep_sea_hydrothermal_vent_gp_6(dhveg-6)_None2084	0	0	0	0	0	2	0	8	0	0	0	0	0	0
Arc;_Euryarchaeota;_Halobacteria;_Halobacteriales;_Deep_sea_hydrothermal_vent_gp_6(dhveg-6)_None2085	0	0	0	0	2	1	0	0	0	0	0	0	0	0
Arc;_Euryarchaeota;_Halobacteria;_Halobacteriales;_Deep_sea_hydrothermal_vent_gp_6(dhveg-6)_None2088	0	0	0	0	0	0	0	0	1	0	0	0	1	0
Arc;_Euryarchaeota;_Halobacteria;_Halobacteriales;_Deep_sea_hydrothermal_vent_gp_6(dhveg-6)_None209	0	0	0	0	0	0	0	1	8	0	0	0	1	0
Arc;_Euryarchaeota;_Halobacteria;_Halobacteriales;_Deep_sea_hydrothermal_vent_gp_6(dhveg-6)_None2090	0	0	0	1	0	0	0	0	0	0	0	0	0	0
Arc;_Euryarchaeota;_Halobacteria;_Halobacteriales;_Deep_sea_hydrothermal_vent_gp_6(dhveg-6)_None2091	0	1	0	0	0	1	0	0	0	0	0	0	0	0
Arc;_Euryarchaeota;_Halobacteria;_Halobacteriales;_Deep_sea_hydrothermal_vent_gp_6(dhveg-6)_None2092	0	0	0	0	0	0	0	0	0	0	0	0	0	2
Arc;_Euryarchaeota;_Halobacteria;_Halobacteriales;_Deep_sea_hydrothermal_vent_gp_6(dhveg-6)_None2093	0	2	0	0	0	0	0	0	0	0	0	0	0	0
Arc;_Euryarchaeota;_Halobacteria;_Halobacteriales;_Deep_sea_hydrothermal_vent_gp_6(dhveg-6)_None2094	0	0	0	0	0	4	0	1	3	0	0	0	0	0
Arc;_Euryarchaeota;_Halobacteria;_Halobacteriales;_Deep_sea_hydrothermal_vent_gp_6(dhveg-6)_None2096	0	0	2	1	0	0	1	3	1	0	0	0	0	0
Arc;_Euryarchaeota;_Halobacteria;_Halobacteriales;_Deep_sea_hydrothermal_vent_gp_6(dhveg-6)_None2097	1	0	0	0	0	0	0	0	0	0	0	0	0	0
Arc;_Euryarchaeota;_Halobacteria;_Halobacteriales;_Deep_sea_hydrothermal_vent_gp_6(dhveg-6)_None2098	0	0	0	0	0	0	0	2	2	0	0	0	0	0
Arc;_Euryarchaeota;_Halobacteria;_Halobacteriales;_Deep_sea_hydrothermal_vent_gp_6(dhveg-6)_None2099	0	0	0	0	0	0	0	0	0	0	0	0	2	0
Arc;_Euryarchaeota;_Halobacteria;_Halobacteriales;_Deep_sea_hydrothermal_vent_gp_6(dhveg-6)_None21	0	0	0	0	0	0	0	0	0	0	0	2	0	0
Arc;_Euryarchaeota;_Halobacteria;_Halobacteriales;_Deep_sea_hydrothermal_vent_gp_6(dhveg-6)_None2101	0	0	0	0	0	0	0	3	0	0	0	0	0	0
Arc;_Euryarchaeota;_Halobacteria;_Halobacteriales;_Deep_sea_hydrothermal_vent_gp_6(dhveg-6)_None2103	0	0	0	0	0	0	0	0	1	0	0	0	1	0
Arc;_Euryarchaeota;_Halobacteria;_Halobacteriales;_Deep_sea_hydrothermal_vent_gp_6(dhveg-6)_None2104	3	0	0	0	2	0	6	6	1	4	0	0	3	1
Arc;_Euryarchaeota;_Halobacteria;_Halobacteriales;_Deep_sea_hydrothermal_vent_gp_6(dhveg-6)_None2106	0	2	2	1	1	13	61	259	26	5	1	7	4	0
Arc;_Euryarchaeota;_Halobacteria;_Halobacteriales;_Deep_sea_hydrothermal_vent_gp_6(dhveg-6)_None2107	0	0	0	0	0	0	0	0	0	0	0	0	3	0
Arc;_Euryarchaeota;_Halobacteria;_Halobacteriales;_Deep_sea_hydrothermal_vent_gp_6(dhveg-6)_None2108	4	0	0	0	0	0	0	0	0	0	0	0	0	0
Arc;_Euryarchaeota;_Halobacteria;_Halobacteriales;_Deep_sea_hydrothermal_vent_gp_6(dhveg-6)_None2109	0	0	0	1	1	6	9	6	0	0	0	0	0	0
Arc;_Euryarchaeota;_Halobacteria;_Halobacteriales;_Deep_sea_hydrothermal_vent_gp_6(dhveg-6)_None211	0	0	0	0	0	0	0	0	4	0	0	0	27	0
Arc;_Euryarchaeota;_Halobacteria;_Halobacteriales;_Deep_sea_hydrothermal_vent_gp_6(dhveg-6)_None2110	0	0	0	0	0	0	0	2	4	0	0	0	0	0
Arc;_Euryarchaeota;_Halobacteria;_Halobacteriales;_Deep_sea_hydrothermal_vent_gp_6(dhveg-6)_None2111	0	0	0	0	0	3	0	0	0	0	0	0	0	0
Arc;_Euryarchaeota;_Halobacteria;_Halobacteriales;_Deep_sea_hydrothermal_vent_gp_6(dhveg-6)_None2112	0	1	0	0	2	0	0	0	0	0	0	0	0	0
Arc;_Euryarchaeota;_Halobacteria;_Halobacteriales;_Deep_sea_hydrothermal_vent_gp_6(dhveg-6)_None2114	0	0	1	1	2	4	0	1	6	3	0	0	2	0
Arc;_Euryarchaeota;_Halobacteria;_Halobacteriales;_Deep_sea_hydrothermal_vent_gp_6(dhveg-6)_None2115	0	2	0	0	8	0	0	0	0	0	0	0	0	0
Arc;_Euryarchaeota;_Halobacteria;_Halobacteriales;_Deep_sea_hydrothermal_vent_gp_6(dhveg-6)_None2116	0	0	0	0	0	0	0	0	0	2	0	0	0	0
Arc;_Euryarchaeota;_Halobacteria;_Halobacteriales;_Deep_sea_hydrothermal_vent_gp_6(dhveg-6)_None212	0	0	0	0	0	0	0	0	0	0	0	4	0	0
Arc;_Euryarchaeota;_Halobacteria;_Halobacteriales;_Deep_sea_hydrothermal_vent_gp_6(dhveg-6)_None2123	0	0	0	0	0	0	0	0	0	0	0	0	1	0
Arc;_Euryarchaeota;_Halobacteria;_Halobacteriales;_Deep_sea_hydrothermal_vent_gp_6(dhveg-6)_None2127	2	1	0	0	0	12	7	44	15	11	7	0	2	0
Arc;_Euryarchaeota;_Halobacteria;_Halobacteriales;_Deep_sea_hydrothermal_vent_gp_6(dhveg-6)_None2128	0	0	0	0	0	0	0	4	0	0	0	0	1	0
Arc;_Euryarchaeota;_Halobacteria;_Halobacteriales;_Deep_sea_hydrothermal_vent_gp_6(dhveg-6)_None2129	0	1	2	0	0	0	0	0	0	0	0	0	0	0
Arc;_Euryarchaeota;_Halobacteria;_Halobacteriales;_Deep_sea_hydrothermal_vent_gp_6(dhveg-6)_None2130	0	0	0	0	0	0	2	0	0	0	0	0	0	0
Arc;_Euryarchaeota;_Halobacteria;_Halobacteriales;_Deep_sea_hydrothermal_vent_gp_6(dhveg-6)_None2131	0	0	0	0	1	0	0	0	0	0	0	0	0	0
Arc;_Euryarchaeota;_Halobacteria;_Halobacteriales;_Deep_sea_hydrothermal_vent_gp_6(dhveg-6)_None2132	0	0	0	3	0	5	0	4	0	0	0	0	0	0
Arc;_Euryarchaeota;_Halobacteria;_Halobacteriales;_Deep_sea_hydrothermal_vent_gp_6(dhveg-6)_None2134	0	0	0	0	0	1	0	0	0	0	0	0	0	0
Arc;_Euryarchaeota;_Halobacteria;_Halobacteriales;_Deep_sea_hydrothermal_vent_gp_6(dhveg-6)_None2135	0	0	0	0	0	0	2	0	0	0	0	9	0	0
Arc;_Euryarchaeota;_Halobacteria;_Halobacteriales;_Deep_sea_hydrothermal_vent_gp_6(dhveg-6)_None2137	0	0	0	0	0	0	0	1	0	0	0	0	0	0
Arc;_Euryarchaeota;_Halobacteria;_Halobacteriales;_Deep_sea_hydrothermal_vent_gp_6(dhveg-6)_None2138	0	0	8	6	1	2	7	37	16	17	22	0	4	0
Arc;_Euryarchaeota;_Halobacteria;_Halobacteriales;_Deep_sea_hydrothermal_vent_gp_6(dhveg-6)_None2139	0	0	0	0	0	0	0	26	2	3	0	0	0	0
Arc;_Euryarchaeota;_Halobacteria;_Halobacteriales;_Deep_sea_hydrothermal_vent_gp_6(dhveg-6)_None214	0	0	0	0	0	0	0	0	0	0	0	0	1	0
Arc;_Euryarchaeota;_Halobacteria;_Halobacteriales;_Deep_sea_hydrothermal_vent_gp_6(dhveg-6)_None2140	0	0	0	0	0	0	1	0	0	0	0	0	0	0
Arc;_Euryarchaeota;_Halobacteria;_Halobacteriales;_Deep_sea_hydrothermal_vent_gp_6(dhveg-6)_None2143	0	0	0	0	0	0	0	0	0	0	0	0	1	0
Arc;_Euryarchaeota;_Halobacteria;_Halobacteriales;_Deep_sea_hydrothermal_vent_gp_6(dhveg-6)_None2144	3	1	0	0	0	8	6	58	4	4	1	0	10	0
Arc;_Euryarchaeota;_Halobacteria;_Halobacteriales;_Deep_sea_hydrothermal_vent_gp_6(dhveg-6)_None2148	0	0	0	0	0	0	0	0	0	0	2	0	0	0
Arc;_Euryarchaeota;_Halobacteria;_Halobacteriales;_Deep_sea_hydrothermal_vent_gp_6(dhveg-6)_None2151	0	0	0	0	1	5	1	3	0	1	2	0	0	0
Arc;_Euryarchaeota;_Halobacteria;_Halobacteriales;_Deep_sea_hydrothermal_vent_gp_6(dhveg-6)_None2152	0	0	0	0	0	0	0	2	0	0	0	0	0	0
Arc;_Euryarchaeota;_Halobacteria;_Halobacteriales;_Deep_sea_hydrothermal_vent_gp_6(dhveg-6)_None2153	0	0	0	0	0	0	0	0	0	0	0	0	1	0
Arc;_Euryarchaeota;_Halobacteria;_Halobacteriales;_Deep_sea_hydrothermal_vent_gp_6(dhveg-6)_None2154	0	0	0	0	0	0	0	0	0	0	0	0	2	0
Arc;_Euryarchaeota;_Halobacteria;_Halobacteriales;_Deep_sea_hydrothermal_vent_gp_6(dhveg-6)_None2155	0	2	0	0	0	0	0	0	0	0	0	0	0	0
Arc;_Euryarchaeota;_Halobacteria;_Halobacteriales;_Deep_sea_hydrothermal_vent_gp_6(dhveg-6)_None2157	6	0	0	0	0	1	5	6	0	6	7	0	1	0
Arc;_Euryarchaeota;_Halobacteria;_Halobacteriales;_Deep_sea_hydrothermal_vent_gp_6(dhveg-6)_None2159	0	0	0	0	0	1	0	0	0	0	0	0	0	0
Arc;_Euryarchaeota;_Halobacteria;_Halobacteriales;_Deep_sea_hydrothermal_vent_gp_6(dhveg-6)_None216	0	0	0	0	0	0	0	0	1	0	0	0	0	0
Arc;_Euryarchaeota;_Halobacteria;_Halobacteriales;_Deep_sea_hydrothermal_vent_gp_6(dhveg-6)_None2160	0	1	0	0	0	0	0	0	0	0	0	0	0	0
Arc;_Euryarchaeota;_Halobacteria;_Halobacteriales;_Deep_sea_hydrothermal_vent_gp_6(dhveg-6)_None2161	0	0	0	0	0	0	0	0	2	0	0	0	2	0
Arc;_Euryarchaeota;_Halobacteria;_Halobacteriales;_Deep_sea_hydrothermal_vent_gp_6(dhveg-6)_None2163	0	0	0	0	0	0	0	0	2	0	0	0	0	0
Arc;_Euryarchaeota;_Halobacteria;_Halobacteriales;_Deep_sea_hydrothermal_vent_gp_6(dhveg-6)_None2164	0	0	0	0	0	0	0	0	3	0	0	0	0	0
Arc;_Euryarchaeota;_Halobacteria;_Halobacteriales;_Deep_sea_hydrothermal_vent_gp_6(dhveg-6)_None2168	0	0	0	0	2	3	0	0	2	0	0	0	4	0
Arc;_Euryarchaeota;_Halobacteria;_Halobacteriales;_Deep_sea_hydrothermal_vent_gp_6(dhveg-6)_None217	0	4	0	0	0	0	0	0	0	0	0	0	0	0
Arc;_Euryarchaeota;_Halobacteria;_Halobacteriales;_Deep_sea_hydrothermal_vent_gp_6(dhveg-6)_None2170	0	1	0	0	0	0	2	2	2	0	0	0	1	0
Arc;_Euryarchaeota;_Halobacteria;_Halobacteriales;_Deep_sea_hydrothermal_vent_gp_6(dhveg-6)_None2172	0	0	0	0	1	0	0	0	1	0	0	0	0	0
Arc;_Euryarchaeota;_Halobacteria;_Halobacteriales;_Deep_sea_hydrothermal_vent_gp_6(dhveg-6)_None2173	0	0	0	0	1	0	0	0	0	0	0	0	0	0
Arc;_Euryarchaeota;_Halobacteria;_Halobacteriales;_Deep_sea_hydrothermal_vent_gp_6(dhveg-6)_None2176	0	1	0	2	0	0	0	0	0	0	1	0	0	0
Arc;_Euryarchaeota;_Halobacteria;_Halobacteriales;_Deep_sea_hydrothermal_vent_gp_6(dhveg-6)_None2179	0	0	0	0	0	0	0	0	0	0	0	0	1	0
Arc;_Euryarchaeota;_Halobacteria;_Halobacteriales;_Deep_sea_hydrothermal_vent_gp_6(dhveg-6)_None218	0	0	0	0	0	0	0	0	0	0	0	0	1	0
Arc;_Euryarchaeota;_Halobacteria;_Halobacteriales;_Deep_sea_hydrothermal_vent_gp_6(dhveg-6)_None2182	0	2	0	0	0	0	0	0	0	1	0	0	1	0
Arc;_Euryarchaeota;_Halobacteria;_Halobacteriales;_Deep_sea_hydrothermal_vent_gp_6(dhveg-6)_None2183	0	0	0	0	0	0	0	1	0	0	0	0	0	0
Arc;_Euryarchaeota;_Halobacteria;_Halobacteriales;_Deep_sea_hydrothermal_vent_gp_6(dhveg-6)_None2184	0	0	0	0	1	0	0	0	0	0	0	0	2	0
Arc;_Euryarchaeota;_Halobacteria;_Halobacteriales;_Deep_sea_hydrothermal_vent_gp_6(dhveg-6)_None2188	0	0	0	0	0	1	0	0	3	0	5	21	0	0
Arc;_Euryarchaeota;_Halobacteria;_Halobacteriales;_Deep_sea_hydrothermal_vent_gp_6(dhveg-6)_None2191	0	0	0	0	0	3	0	0	0	0	0	0	0	0
Arc;_Euryarchaeota;_Halobacteria;_Halobacteriales;_Deep_sea_hydrothermal_vent_gp_6(dhveg-6)_None2192	0	0	0	0	1	0	0	0	0	0	0	0	0	0
Arc;_Euryarchaeota;_Halobacteria;_Halobacteriales;_Deep_sea_hydrothermal_vent_gp_6(dhveg-6)_None2194	0	0	0	0	0	0	0	0	0	0	0	0	3	0
Arc;_Euryarchaeota;_Halobacteria;_Halobacteriales;_Deep_sea_hydrothermal_vent_gp_6(dhveg-6)_None2197	0	0	0	0	0	0	0	0	0	1	0	0	0	0
Arc;_Euryarchaeota;_Halobacteria;_Halobacteriales;_Deep_sea_hydrothermal_vent_gp_6(dhveg-6)_None220	1	2	0	0	0	30	26	10	0	0	0	0	0	0
Arc;_Euryarchaeota;_Halobacteria;_Halobacteriales;_Deep_sea_hydrothermal_vent_gp_6(dhveg-6)_None2201	0	2	0	0	0	0	0	0	0	0	0	0	0	0
Arc;_Euryarchaeota;_Halobacteria;_Halobacteriales;_Deep_sea_hydrothermal_vent_gp_6(dhveg-6)_None2203	0	0	0	0	0	0	0	3	0	0	0	0	0	0
Arc;_Euryarchaeota;_Halobacteria;_Halobacteriales;_Deep_sea_hydrothermal_vent_gp_6(dhveg-6)_None2204	0	0	0	0	0	6	3	0	2	0	0	0	0	0
Arc;_Euryarchaeota;_Halobacteria;_Halobacteriales;_Deep_sea_hydrothermal_vent_gp_6(dhveg-6)_None2205	2	0	0	0	0	3	0	0	0	0	0	0	1	0
Arc;_Euryarchaeota;_Halobacteria;_Halobacteriales;_Deep_sea_hydrothermal_vent_gp_6(dhveg-6)_None2207	0	1	0	0	0	0	0	0	0	0	0	0	0	0
Arc;_Euryarchaeota;_Halobacteria;_Halobacteriales;_Deep_sea_hydrothermal_vent_gp_6(dhveg-6)_None2209	0	0	0	0	0	1	1	2	3	0	0	9	1	0
Arc;_Euryarchaeota;_Halobacteria;_Halobacteriales;_Deep_sea_hydrothermal_vent_gp_6(dhveg-6)_None221	3	1	0	2	6	8	1	7	24	12	0	0	41	0
Arc;_Euryarchaeota;_Halobacteria;_Halobacteriales;_Deep_sea_hydrothermal_vent_gp_6(dhveg-6)_None2210	0	0	0	0	0	0	0	0	1	0	0	0	0	0
Arc;_Euryarchaeota;_Halobacteria;_Halobacteriales;_Deep_sea_hydrothermal_vent_gp_6(dhveg-6)_None2212	0	0	1	0	0	0	0	0	0	0	0	0	0	0
Arc;_Euryarchaeota;_Halobacteria;_Halobacteriales;_Deep_sea_hydrothermal_vent_gp_6(dhveg-6)_None2213	0	0	0	0	0	1	0	0	2	0	0	0	4	0
Arc;_Euryarchaeota;_Halobacteria;_Halobacteriales;_Deep_sea_hydrothermal_vent_gp_6(dhveg-6)_None2214	0	0	0	0	0	0	0	0	1	0	0	0	0	0
Arc;_Euryarchaeota;_Halobacteria;_Halobacteriales;_Deep_sea_hydrothermal_vent_gp_6(dhveg-6)_None2218	0	0	0	0	0	0	0	1	1	0	1	0	0	0
Arc;_Euryarchaeota;_Halobacteria;_Halobacteriales;_Deep_sea_hydrothermal_vent_gp_6(dhveg-6)_None2219	0	0	0	0	0	0	0	3	0	0	0	0	0	0
Arc;_Euryarchaeota;_Halobacteria;_Halobacteriales;_Deep_sea_hydrothermal_vent_gp_6(dhveg-6)_None222	0	0	0	0	0	1	0	0	0	0	0	0	0	0
Arc;_Euryarchaeota;_Halobacteria;_Halobacteriales;_Deep_sea_hydrothermal_vent_gp_6(dhveg-6)_None2220	0	0	1	0	0	0	0	0	0	0	0	0	0	0
Arc;_Euryarchaeota;_Halobacteria;_Halobacteriales;_Deep_sea_hydrothermal_vent_gp_6(dhveg-6)_None2222	0	0	0	0	0	0	0	0	1	0	0	0	0	0
Arc;_Euryarchaeota;_Halobacteria;_Halobacteriales;_Deep_sea_hydrothermal_vent_gp_6(dhveg-6)_None2224	0	0	0	2	2	1	0	3	15	0	8	11	2	0
Arc;_Euryarchaeota;_Halobacteria;_Halobacteriales;_Deep_sea_hydrothermal_vent_gp_6(dhveg-6)_None2226	1	0	0	0	0	0	0	0	2	0	0	0	0	0
Arc;_Euryarchaeota;_Halobacteria;_Halobacteriales;_Deep_sea_hydrothermal_vent_gp_6(dhveg-6)_None2227	0	1	0	0	0	0	0	0	0	0	0	0	0	0
Arc;_Euryarchaeota;_Halobacteria;_Halobacteriales;_Deep_sea_hydrothermal_vent_gp_6(dhveg-6)_None2228	0	0	0	0	0	0	5	0	1	0	0	0	0	0
Arc;_Euryarchaeota;_Halobacteria;_Halobacteriales;_Deep_sea_hydrothermal_vent_gp_6(dhveg-6)_None2229	0	0	0	2	0	0	0	0	0	4	2	0	0	0
Arc;_Euryarchaeota;_Halobacteria;_Halobacteriales;_Deep_sea_hydrothermal_vent_gp_6(dhveg-6)_None2230	0	0	0	0	1	3	1	9	0	2	0	0	1	0
Arc;_Euryarchaeota;_Halobacteria;_Halobacteriales;_Deep_sea_hydrothermal_vent_gp_6(dhveg-6)_None2237	0	0	0	0	1	2	0	6	8	1	0	0	4	0
Arc;_Euryarchaeota;_Halobacteria;_Halobacteriales;_Deep_sea_hydrothermal_vent_gp_6(dhveg-6)_None2238	1	0	0	0	0	0	0	0	0	0	0	0	0	0
Arc;_Euryarchaeota;_Halobacteria;_Halobacteriales;_Deep_sea_hydrothermal_vent_gp_6(dhveg-6)_None2243	0	1	0	0	0	0	0	0	0	0	0	0	0	0
Arc;_Euryarchaeota;_Halobacteria;_Halobacteriales;_Deep_sea_hydrothermal_vent_gp_6(dhveg-6)_None2245	0	5	3	0	3	12	0	0	1	0	0	0	4	0
Arc;_Euryarchaeota;_Halobacteria;_Halobacteriales;_Deep_sea_hydrothermal_vent_gp_6(dhveg-6)_None2246	0	2	0	0	0	2	0	7	2	0	0	0	0	0
Arc;_Euryarchaeota;_Halobacteria;_Halobacteriales;_Deep_sea_hydrothermal_vent_gp_6(dhveg-6)_None2247	0	0	0	0	0	0	0	0	1	0	0	0	1	0
Arc;_Euryarchaeota;_Halobacteria;_Halobacteriales;_Deep_sea_hydrothermal_vent_gp_6(dhveg-6)_None2249	0	0	0	5	1	0	3	20	1	0	0	1	0	0
Arc;_Euryarchaeota;_Halobacteria;_Halobacteriales;_Deep_sea_hydrothermal_vent_gp_6(dhveg-6)_None2250	0	0	0	0	0	0	0	1	0	1	1	0	0	0
Arc;_Euryarchaeota;_Halobacteria;_Halobacteriales;_Deep_sea_hydrothermal_vent_gp_6(dhveg-6)_None2254	0	0	0	0	0	0	1	0	0	0	0	0	0	0
Arc;_Euryarchaeota;_Halobacteria;_Halobacteriales;_Deep_sea_hydrothermal_vent_gp_6(dhveg-6)_None2255	2	0	0	0	0	2	0	0	0	0	0	0	2	0
Arc;_Euryarchaeota;_Halobacteria;_Halobacteriales;_Deep_sea_hydrothermal_vent_gp_6(dhveg-6)_None2256	0	0	0	0	0	0	0	0	0	0	0	0	1	0
Arc;_Euryarchaeota;_Halobacteria;_Halobacteriales;_Deep_sea_hydrothermal_vent_gp_6(dhveg-6)_None2257	4	0	0	0	4	32	0	8	12	2	0	0	7	0
Arc;_Euryarchaeota;_Halobacteria;_Halobacteriales;_Deep_sea_hydrothermal_vent_gp_6(dhveg-6)_None2258	0	0	0	0	0	0	1	1	2	0	0	0	0	2
Arc;_Euryarchaeota;_Halobacteria;_Halobacteriales;_Deep_sea_hydrothermal_vent_gp_6(dhveg-6)_None2260	0	0	0	0	0	1	0	0	0	0	0	0	0	0
Arc;_Euryarchaeota;_Halobacteria;_Halobacteriales;_Deep_sea_hydrothermal_vent_gp_6(dhveg-6)_None2261	0	0	0	0	0	0	0	0	1	0	0	0	1	0
Arc;_Euryarchaeota;_Halobacteria;_Halobacteriales;_Deep_sea_hydrothermal_vent_gp_6(dhveg-6)_None2262	1	0	0	1	2	18	15	14	4	8	0	0	0	0
Arc;_Euryarchaeota;_Halobacteria;_Halobacteriales;_Deep_sea_hydrothermal_vent_gp_6(dhveg-6)_None2263	0	0	0	0	0	0	0	0	9	0	0	0	1	0
Arc;_Euryarchaeota;_Halobacteria;_Halobacteriales;_Deep_sea_hydrothermal_vent_gp_6(dhveg-6)_None2264	0	0	1	0	0	0	0	0	0	0	0	0	0	0
Arc;_Euryarchaeota;_Halobacteria;_Halobacteriales;_Deep_sea_hydrothermal_vent_gp_6(dhveg-6)_None2265	0	0	0	0	0	2	0	1	1	0	0	0	3	0
Arc;_Euryarchaeota;_Halobacteria;_Halobacteriales;_Deep_sea_hydrothermal_vent_gp_6(dhveg-6)_None2266	0	0	0	0	0	0	0	0	0	0	0	0	2	0
Arc;_Euryarchaeota;_Halobacteria;_Halobacteriales;_Deep_sea_hydrothermal_vent_gp_6(dhveg-6)_None2268	0	0	0	0	0	0	0	0	0	0	0	0	3	0
Arc;_Euryarchaeota;_Halobacteria;_Halobacteriales;_Deep_sea_hydrothermal_vent_gp_6(dhveg-6)_None227	0	0	0	0	0	0	0	0	2	0	0	0	3	0
Arc;_Euryarchaeota;_Halobacteria;_Halobacteriales;_Deep_sea_hydrothermal_vent_gp_6(dhveg-6)_None2272	0	0	0	0	0	0	0	0	0	0	0	0	1	0
Arc;_Euryarchaeota;_Halobacteria;_Halobacteriales;_Deep_sea_hydrothermal_vent_gp_6(dhveg-6)_None2277	0	0	0	0	0	0	0	0	0	0	0	0	1	0
Arc;_Euryarchaeota;_Halobacteria;_Halobacteriales;_Deep_sea_hydrothermal_vent_gp_6(dhveg-6)_None2279	0	0	0	0	0	0	0	0	1	0	0	0	0	0
Arc;_Euryarchaeota;_Halobacteria;_Halobacteriales;_Deep_sea_hydrothermal_vent_gp_6(dhveg-6)_None2280	0	0	0	0	0	1	7	10	1	0	0	0	0	0
Arc;_Euryarchaeota;_Halobacteria;_Halobacteriales;_Deep_sea_hydrothermal_vent_gp_6(dhveg-6)_None2281	3	0	4	6	0	0	1	0	3	0	0	0	1	4
Arc;_Euryarchaeota;_Halobacteria;_Halobacteriales;_Deep_sea_hydrothermal_vent_gp_6(dhveg-6)_None2284	1	0	0	0	0	1	0	19	3	4	6	0	0	0
Arc;_Euryarchaeota;_Halobacteria;_Halobacteriales;_Deep_sea_hydrothermal_vent_gp_6(dhveg-6)_None2285	0	0	0	0	0	1	0	0	1	0	0	0	0	0
Arc;_Euryarchaeota;_Halobacteria;_Halobacteriales;_Deep_sea_hydrothermal_vent_gp_6(dhveg-6)_None2289	5	63	0	2	33	31	6	36	17	7	1	0	7	0
Arc;_Euryarchaeota;_Halobacteria;_Halobacteriales;_Deep_sea_hydrothermal_vent_gp_6(dhveg-6)_None229	0	0	0	0	0	3	0	1	0	0	0	0	1	0
Arc;_Euryarchaeota;_Halobacteria;_Halobacteriales;_Deep_sea_hydrothermal_vent_gp_6(dhveg-6)_None2290	1	0	1	0	3	15	1	6	23	0	2	3	2	0
Arc;_Euryarchaeota;_Halobacteria;_Halobacteriales;_Deep_sea_hydrothermal_vent_gp_6(dhveg-6)_None2292	0	1	0	0	0	0	0	0	0	0	0	0	0	0
Arc;_Euryarchaeota;_Halobacteria;_Halobacteriales;_Deep_sea_hydrothermal_vent_gp_6(dhveg-6)_None2293	0	0	0	0	0	0	0	0	0	0	0	0	2	0
Arc;_Euryarchaeota;_Halobacteria;_Halobacteriales;_Deep_sea_hydrothermal_vent_gp_6(dhveg-6)_None2298	0	2	0	0	0	3	0	1	1	0	1	0	0	0
Arc;_Euryarchaeota;_Halobacteria;_Halobacteriales;_Deep_sea_hydrothermal_vent_gp_6(dhveg-6)_None2299	0	4	0	0	0	0	0	0	0	1	0	0	0	0
Arc;_Euryarchaeota;_Halobacteria;_Halobacteriales;_Deep_sea_hydrothermal_vent_gp_6(dhveg-6)_None2301	0	0	0	0	0	0	0	0	0	0	0	0	2	0
Arc;_Euryarchaeota;_Halobacteria;_Halobacteriales;_Deep_sea_hydrothermal_vent_gp_6(dhveg-6)_None2302	5	0	3	0	0	1	1	4	30	7	10	73	16	1
Arc;_Euryarchaeota;_Halobacteria;_Halobacteriales;_Deep_sea_hydrothermal_vent_gp_6(dhveg-6)_None2304	0	0	1	0	0	0	0	2	0	0	0	0	0	0
Arc;_Euryarchaeota;_Halobacteria;_Halobacteriales;_Deep_sea_hydrothermal_vent_gp_6(dhveg-6)_None2305	0	0	0	0	2	0	0	0	0	0	0	0	0	0
Arc;_Euryarchaeota;_Halobacteria;_Halobacteriales;_Deep_sea_hydrothermal_vent_gp_6(dhveg-6)_None2307	0	0	0	0	0	0	4	0	1	0	0	0	2	0
Arc;_Euryarchaeota;_Halobacteria;_Halobacteriales;_Deep_sea_hydrothermal_vent_gp_6(dhveg-6)_None2308	0	0	0	0	0	5	3	14	0	0	0	0	3	0
Arc;_Euryarchaeota;_Halobacteria;_Halobacteriales;_Deep_sea_hydrothermal_vent_gp_6(dhveg-6)_None231	0	0	0	0	0	4	0	1	1	0	0	0	1	0
Arc;_Euryarchaeota;_Halobacteria;_Halobacteriales;_Deep_sea_hydrothermal_vent_gp_6(dhveg-6)_None2310	0	0	0	0	0	0	0	0	0	0	0	0	1	0
Arc;_Euryarchaeota;_Halobacteria;_Halobacteriales;_Deep_sea_hydrothermal_vent_gp_6(dhveg-6)_None2311	0	0	0	0	1	0	0	0	0	0	0	0	0	0
Arc;_Euryarchaeota;_Halobacteria;_Halobacteriales;_Deep_sea_hydrothermal_vent_gp_6(dhveg-6)_None2313	0	0	1	0	0	1	1	0	2	2	0	0	1	0
Arc;_Euryarchaeota;_Halobacteria;_Halobacteriales;_Deep_sea_hydrothermal_vent_gp_6(dhveg-6)_None2316	3	0	3	0	6	2	0	26	11	0	4	0	0	1
Arc;_Euryarchaeota;_Halobacteria;_Halobacteriales;_Deep_sea_hydrothermal_vent_gp_6(dhveg-6)_None2317	0	0	0	1	2	4	11	27	11	1	1	0	2	0
Arc;_Euryarchaeota;_Halobacteria;_Halobacteriales;_Deep_sea_hydrothermal_vent_gp_6(dhveg-6)_None2319	0	0	0	0	5	6	6	62	26	5	0	0	8	0
Arc;_Euryarchaeota;_Halobacteria;_Halobacteriales;_Deep_sea_hydrothermal_vent_gp_6(dhveg-6)_None232	0	0	0	0	0	0	0	2	0	0	0	0	0	0
Arc;_Euryarchaeota;_Halobacteria;_Halobacteriales;_Deep_sea_hydrothermal_vent_gp_6(dhveg-6)_None2321	0	1	0	0	0	0	0	0	0	0	0	0	1	0
Arc;_Euryarchaeota;_Halobacteria;_Halobacteriales;_Deep_sea_hydrothermal_vent_gp_6(dhveg-6)_None2324	0	0	0	0	0	0	0	0	2	0	0	0	0	0
Arc;_Euryarchaeota;_Halobacteria;_Halobacteriales;_Deep_sea_hydrothermal_vent_gp_6(dhveg-6)_None2327	0	0	0	0	0	19	2	0	0	0	0	0	0	0
Arc;_Euryarchaeota;_Halobacteria;_Halobacteriales;_Deep_sea_hydrothermal_vent_gp_6(dhveg-6)_None2328	0	0	0	0	0	0	0	1	0	0	0	0	0	0
Arc;_Euryarchaeota;_Halobacteria;_Halobacteriales;_Deep_sea_hydrothermal_vent_gp_6(dhveg-6)_None233	4	15	3	4	7	54	33	172	106	39	39	91	87	0
Arc;_Euryarchaeota;_Halobacteria;_Halobacteriales;_Deep_sea_hydrothermal_vent_gp_6(dhveg-6)_None2331	0	0	0	0	0	0	0	0	0	0	0	0	5	0
Arc;_Euryarchaeota;_Halobacteria;_Halobacteriales;_Deep_sea_hydrothermal_vent_gp_6(dhveg-6)_None2333	0	0	0	0	1	0	0	0	5	0	0	0	1	0
Arc;_Euryarchaeota;_Halobacteria;_Halobacteriales;_Deep_sea_hydrothermal_vent_gp_6(dhveg-6)_None2334	0	0	0	0	1	0	0	0	1	0	0	0	0	0
Arc;_Euryarchaeota;_Halobacteria;_Halobacteriales;_Deep_sea_hydrothermal_vent_gp_6(dhveg-6)_None2336	0	0	0	1	0	0	1	0	0	0	0	0	0	0
Arc;_Euryarchaeota;_Halobacteria;_Halobacteriales;_Deep_sea_hydrothermal_vent_gp_6(dhveg-6)_None2337	0	0	0	0	1	6	0	0	4	0	0	0	2	0
Arc;_Euryarchaeota;_Halobacteria;_Halobacteriales;_Deep_sea_hydrothermal_vent_gp_6(dhveg-6)_None2339	0	0	0	0	3	0	0	0	2	0	1	0	1	0
Arc;_Euryarchaeota;_Halobacteria;_Halobacteriales;_Deep_sea_hydrothermal_vent_gp_6(dhveg-6)_None234	0	0	0	0	1	0	0	0	4	0	0	0	6	0
Arc;_Euryarchaeota;_Halobacteria;_Halobacteriales;_Deep_sea_hydrothermal_vent_gp_6(dhveg-6)_None2340	0	0	0	0	1	0	0	0	0	0	0	0	0	0
Arc;_Euryarchaeota;_Halobacteria;_Halobacteriales;_Deep_sea_hydrothermal_vent_gp_6(dhveg-6)_None2341	0	0	0	0	0	0	0	0	0	0	0	0	1	0
Arc;_Euryarchaeota;_Halobacteria;_Halobacteriales;_Deep_sea_hydrothermal_vent_gp_6(dhveg-6)_None2342	0	0	0	0	0	0	0	0	0	0	0	0	5	0
Arc;_Euryarchaeota;_Halobacteria;_Halobacteriales;_Deep_sea_hydrothermal_vent_gp_6(dhveg-6)_None2344	0	0	0	0	0	6	0	6	1	0	0	0	0	0
Arc;_Euryarchaeota;_Halobacteria;_Halobacteriales;_Deep_sea_hydrothermal_vent_gp_6(dhveg-6)_None2346	0	0	0	0	0	0	0	0	0	0	0	0	1	0
Arc;_Euryarchaeota;_Halobacteria;_Halobacteriales;_Deep_sea_hydrothermal_vent_gp_6(dhveg-6)_None2349	0	14	0	0	0	2	0	0	0	0	0	0	0	0
Arc;_Euryarchaeota;_Halobacteria;_Halobacteriales;_Deep_sea_hydrothermal_vent_gp_6(dhveg-6)_None235	0	3	0	0	3	4	0	0	1	0	0	0	0	0
Arc;_Euryarchaeota;_Halobacteria;_Halobacteriales;_Deep_sea_hydrothermal_vent_gp_6(dhveg-6)_None2350	0	0	0	0	0	0	0	1	0	0	0	0	0	0
Arc;_Euryarchaeota;_Halobacteria;_Halobacteriales;_Deep_sea_hydrothermal_vent_gp_6(dhveg-6)_None2352	0	0	0	0	0	1	1	1	0	0	0	0	0	0
Arc;_Euryarchaeota;_Halobacteria;_Halobacteriales;_Deep_sea_hydrothermal_vent_gp_6(dhveg-6)_None2353	0	0	0	0	0	0	0	0	1	0	0	0	0	0
Arc;_Euryarchaeota;_Halobacteria;_Halobacteriales;_Deep_sea_hydrothermal_vent_gp_6(dhveg-6)_None2355	1	0	0	0	2	0	0	0	1	0	0	0	1	0
Arc;_Euryarchaeota;_Halobacteria;_Halobacteriales;_Deep_sea_hydrothermal_vent_gp_6(dhveg-6)_None2356	0	0	0	0	0	15	0	0	0	0	0	0	0	0
Arc;_Euryarchaeota;_Halobacteria;_Halobacteriales;_Deep_sea_hydrothermal_vent_gp_6(dhveg-6)_None2358	0	0	0	0	0	0	0	0	0	0	1	0	0	0
Arc;_Euryarchaeota;_Halobacteria;_Halobacteriales;_Deep_sea_hydrothermal_vent_gp_6(dhveg-6)_None2359	0	0	0	0	0	0	0	0	0	0	0	0	2	0
Arc;_Euryarchaeota;_Halobacteria;_Halobacteriales;_Deep_sea_hydrothermal_vent_gp_6(dhveg-6)_None236	0	0	0	0	1	8	0	0	7	0	0	0	0	0
Arc;_Euryarchaeota;_Halobacteria;_Halobacteriales;_Deep_sea_hydrothermal_vent_gp_6(dhveg-6)_None2360	1	0	0	0	0	2	0	3	0	0	0	0	1	0
Arc;_Euryarchaeota;_Halobacteria;_Halobacteriales;_Deep_sea_hydrothermal_vent_gp_6(dhveg-6)_None2364	1	3	4	2	0	4	0	3	4	0	0	3	1	0
Arc;_Euryarchaeota;_Halobacteria;_Halobacteriales;_Deep_sea_hydrothermal_vent_gp_6(dhveg-6)_None2367	0	0	3	0	4	4	2	0	14	4	0	0	18	0
Arc;_Euryarchaeota;_Halobacteria;_Halobacteriales;_Deep_sea_hydrothermal_vent_gp_6(dhveg-6)_None2368	0	0	0	0	0	0	0	0	0	0	0	0	1	0
Arc;_Euryarchaeota;_Halobacteria;_Halobacteriales;_Deep_sea_hydrothermal_vent_gp_6(dhveg-6)_None2369	0	1	0	4	0	10	3	11	15	4	1	0	11	0
Arc;_Euryarchaeota;_Halobacteria;_Halobacteriales;_Deep_sea_hydrothermal_vent_gp_6(dhveg-6)_None2373	0	0	0	0	3	14	0	8	0	0	0	0	2	0
Arc;_Euryarchaeota;_Halobacteria;_Halobacteriales;_Deep_sea_hydrothermal_vent_gp_6(dhveg-6)_None2375	0	0	0	0	0	0	0	1	0	0	0	0	0	0
Arc;_Euryarchaeota;_Halobacteria;_Halobacteriales;_Deep_sea_hydrothermal_vent_gp_6(dhveg-6)_None2376	0	0	0	0	0	2	0	0	2	0	0	1	5	0
Arc;_Euryarchaeota;_Halobacteria;_Halobacteriales;_Deep_sea_hydrothermal_vent_gp_6(dhveg-6)_None2377	0	1	0	0	0	5	0	0	0	0	0	0	0	0
Arc;_Euryarchaeota;_Halobacteria;_Halobacteriales;_Deep_sea_hydrothermal_vent_gp_6(dhveg-6)_None2378	0	0	0	0	0	0	0	1	0	0	0	0	0	0
Arc;_Euryarchaeota;_Halobacteria;_Halobacteriales;_Deep_sea_hydrothermal_vent_gp_6(dhveg-6)_None2379	1	1	14	0	0	0	0	2	0	0	0	2	1	0
Arc;_Euryarchaeota;_Halobacteria;_Halobacteriales;_Deep_sea_hydrothermal_vent_gp_6(dhveg-6)_None238	0	0	0	0	0	0	0	0	0	0	0	2	0	0
Arc;_Euryarchaeota;_Halobacteria;_Halobacteriales;_Deep_sea_hydrothermal_vent_gp_6(dhveg-6)_None2382	0	0	0	0	0	0	0	0	2	0	0	0	0	0
Arc;_Euryarchaeota;_Halobacteria;_Halobacteriales;_Deep_sea_hydrothermal_vent_gp_6(dhveg-6)_None2383	0	0	0	0	0	9	0	1	0	0	0	0	1	0
Arc;_Euryarchaeota;_Halobacteria;_Halobacteriales;_Deep_sea_hydrothermal_vent_gp_6(dhveg-6)_None2386	0	0	0	0	0	0	0	0	0	0	0	3	0	0
Arc;_Euryarchaeota;_Halobacteria;_Halobacteriales;_Deep_sea_hydrothermal_vent_gp_6(dhveg-6)_None2389	0	0	0	0	0	0	0	3	0	0	0	0	0	0
Arc;_Euryarchaeota;_Halobacteria;_Halobacteriales;_Deep_sea_hydrothermal_vent_gp_6(dhveg-6)_None2390	8	8	22	0	6	285	32	64	84	17	5	22	10	0
Arc;_Euryarchaeota;_Halobacteria;_Halobacteriales;_Deep_sea_hydrothermal_vent_gp_6(dhveg-6)_None2392	0	0	0	0	0	0	0	0	3	0	0	0	0	0
Arc;_Euryarchaeota;_Halobacteria;_Halobacteriales;_Deep_sea_hydrothermal_vent_gp_6(dhveg-6)_None2393	0	0	0	0	0	0	0	0	0	0	0	0	1	0
Arc;_Euryarchaeota;_Halobacteria;_Halobacteriales;_Deep_sea_hydrothermal_vent_gp_6(dhveg-6)_None2394	0	1	0	0	0	0	0	0	0	2	0	0	0	0
Arc;_Euryarchaeota;_Halobacteria;_Halobacteriales;_Deep_sea_hydrothermal_vent_gp_6(dhveg-6)_None2398	0	0	0	0	0	0	0	3	0	0	0	0	0	0
Arc;_Euryarchaeota;_Halobacteria;_Halobacteriales;_Deep_sea_hydrothermal_vent_gp_6(dhveg-6)_None240	15	9	15	1	3	92	7	27	11	57	0	0	12	4
Arc;_Euryarchaeota;_Halobacteria;_Halobacteriales;_Deep_sea_hydrothermal_vent_gp_6(dhveg-6)_None2402	0	0	0	0	0	0	0	0	0	0	0	0	2	0
Arc;_Euryarchaeota;_Halobacteria;_Halobacteriales;_Deep_sea_hydrothermal_vent_gp_6(dhveg-6)_None2403	0	0	0	0	0	0	1	3	0	1	0	0	0	0
Arc;_Euryarchaeota;_Halobacteria;_Halobacteriales;_Deep_sea_hydrothermal_vent_gp_6(dhveg-6)_None2405	0	0	0	0	0	0	0	0	0	0	0	0	3	0
Arc;_Euryarchaeota;_Halobacteria;_Halobacteriales;_Deep_sea_hydrothermal_vent_gp_6(dhveg-6)_None2406	0	50	1	2	86	13	1	0	0	0	0	0	0	0
Arc;_Euryarchaeota;_Halobacteria;_Halobacteriales;_Deep_sea_hydrothermal_vent_gp_6(dhveg-6)_None2407	0	0	0	0	3	0	0	0	0	0	0	0	0	0
Arc;_Euryarchaeota;_Halobacteria;_Halobacteriales;_Deep_sea_hydrothermal_vent_gp_6(dhveg-6)_None2409	4	0	0	1	1	21	36	24	6	11	0	0	5	0
Arc;_Euryarchaeota;_Halobacteria;_Halobacteriales;_Deep_sea_hydrothermal_vent_gp_6(dhveg-6)_None2410	0	0	0	0	2	0	0	0	3	0	0	0	0	0
Arc;_Euryarchaeota;_Halobacteria;_Halobacteriales;_Deep_sea_hydrothermal_vent_gp_6(dhveg-6)_None2411	6	0	0	0	0	0	0	0	0	0	0	0	0	0
Arc;_Euryarchaeota;_Halobacteria;_Halobacteriales;_Deep_sea_hydrothermal_vent_gp_6(dhveg-6)_None2412	7	0	0	0	1	1	0	5	2	0	0	4	4	0
Arc;_Euryarchaeota;_Halobacteria;_Halobacteriales;_Deep_sea_hydrothermal_vent_gp_6(dhveg-6)_None2413	0	0	0	0	0	0	0	0	0	0	0	0	4	0
Arc;_Euryarchaeota;_Halobacteria;_Halobacteriales;_Deep_sea_hydrothermal_vent_gp_6(dhveg-6)_None2414	0	0	0	0	0	0	0	1	2	0	0	0	0	0
Arc;_Euryarchaeota;_Halobacteria;_Halobacteriales;_Deep_sea_hydrothermal_vent_gp_6(dhveg-6)_None2415	0	0	0	0	0	0	0	0	1	0	0	0	0	0
Arc;_Euryarchaeota;_Halobacteria;_Halobacteriales;_Deep_sea_hydrothermal_vent_gp_6(dhveg-6)_None2417	0	1	0	0	0	0	0	0	0	0	0	0	0	0
Arc;_Euryarchaeota;_Halobacteria;_Halobacteriales;_Deep_sea_hydrothermal_vent_gp_6(dhveg-6)_None2418	0	1	0	0	1	0	0	0	0	0	0	0	0	0
Arc;_Euryarchaeota;_Halobacteria;_Halobacteriales;_Deep_sea_hydrothermal_vent_gp_6(dhveg-6)_None2422	0	0	0	0	2	0	0	0	0	0	0	0	0	0
Arc;_Euryarchaeota;_Halobacteria;_Halobacteriales;_Deep_sea_hydrothermal_vent_gp_6(dhveg-6)_None2423	0	0	0	0	0	0	0	8	0	0	0	0	0	0
Arc;_Euryarchaeota;_Halobacteria;_Halobacteriales;_Deep_sea_hydrothermal_vent_gp_6(dhveg-6)_None2425	0	0	0	0	0	0	0	0	0	0	0	0	1	0
Arc;_Euryarchaeota;_Halobacteria;_Halobacteriales;_Deep_sea_hydrothermal_vent_gp_6(dhveg-6)_None2426	0	1	5	0	0	1	0	0	0	0	0	0	0	0
Arc;_Euryarchaeota;_Halobacteria;_Halobacteriales;_Deep_sea_hydrothermal_vent_gp_6(dhveg-6)_None2427	0	0	0	0	0	0	0	0	1	0	0	0	0	0
Arc;_Euryarchaeota;_Halobacteria;_Halobacteriales;_Deep_sea_hydrothermal_vent_gp_6(dhveg-6)_None2429	0	0	0	0	1	0	0	0	0	0	0	0	2	0
Arc;_Euryarchaeota;_Halobacteria;_Halobacteriales;_Deep_sea_hydrothermal_vent_gp_6(dhveg-6)_None2430	0	0	0	0	0	0	0	0	1	0	0	0	0	0
Arc;_Euryarchaeota;_Halobacteria;_Halobacteriales;_Deep_sea_hydrothermal_vent_gp_6(dhveg-6)_None2431	0	6	0	0	2	0	0	0	0	0	0	0	0	0
Arc;_Euryarchaeota;_Halobacteria;_Halobacteriales;_Deep_sea_hydrothermal_vent_gp_6(dhveg-6)_None2432	0	1	3	0	0	7	0	1	0	0	0	1	1	0
Arc;_Euryarchaeota;_Halobacteria;_Halobacteriales;_Deep_sea_hydrothermal_vent_gp_6(dhveg-6)_None2433	0	0	0	0	0	0	0	3	0	0	0	0	0	0
Arc;_Euryarchaeota;_Halobacteria;_Halobacteriales;_Deep_sea_hydrothermal_vent_gp_6(dhveg-6)_None2434	0	3	0	0	0	1	0	0	0	0	0	0	0	0
Arc;_Euryarchaeota;_Halobacteria;_Halobacteriales;_Deep_sea_hydrothermal_vent_gp_6(dhveg-6)_None2436	0	0	0	0	0	0	0	0	0	0	0	0	2	0
Arc;_Euryarchaeota;_Halobacteria;_Halobacteriales;_Deep_sea_hydrothermal_vent_gp_6(dhveg-6)_None2439	0	0	1	0	0	0	0	1	4	0	0	0	0	0
Arc;_Euryarchaeota;_Halobacteria;_Halobacteriales;_Deep_sea_hydrothermal_vent_gp_6(dhveg-6)_None244	0	0	0	0	0	0	0	0	1	0	0	0	1	0
Arc;_Euryarchaeota;_Halobacteria;_Halobacteriales;_Deep_sea_hydrothermal_vent_gp_6(dhveg-6)_None2440	0	1	0	0	0	0	0	6	5	1	0	12	10	0
Arc;_Euryarchaeota;_Halobacteria;_Halobacteriales;_Deep_sea_hydrothermal_vent_gp_6(dhveg-6)_None2441	0	0	0	0	0	0	0	0	2	0	0	0	0	0
Arc;_Euryarchaeota;_Halobacteria;_Halobacteriales;_Deep_sea_hydrothermal_vent_gp_6(dhveg-6)_None2442	0	0	0	0	0	0	0	0	0	0	0	0	1	0
Arc;_Euryarchaeota;_Halobacteria;_Halobacteriales;_Deep_sea_hydrothermal_vent_gp_6(dhveg-6)_None2444	3	0	0	0	1	0	0	0	8	0	0	0	0	0
Arc;_Euryarchaeota;_Halobacteria;_Halobacteriales;_Deep_sea_hydrothermal_vent_gp_6(dhveg-6)_None2445	0	0	0	0	0	0	0	0	0	0	1	0	0	0
Arc;_Euryarchaeota;_Halobacteria;_Halobacteriales;_Deep_sea_hydrothermal_vent_gp_6(dhveg-6)_None2447	0	0	0	0	0	0	0	0	0	0	0	1	0	0
Arc;_Euryarchaeota;_Halobacteria;_Halobacteriales;_Deep_sea_hydrothermal_vent_gp_6(dhveg-6)_None2448	0	0	0	0	0	0	0	1	0	0	0	0	0	0
Arc;_Euryarchaeota;_Halobacteria;_Halobacteriales;_Deep_sea_hydrothermal_vent_gp_6(dhveg-6)_None2449	0	0	0	0	0	0	0	0	1	0	0	0	0	0
Arc;_Euryarchaeota;_Halobacteria;_Halobacteriales;_Deep_sea_hydrothermal_vent_gp_6(dhveg-6)_None245	0	0	0	0	0	0	0	0	1	0	0	0	0	0
Arc;_Euryarchaeota;_Halobacteria;_Halobacteriales;_Deep_sea_hydrothermal_vent_gp_6(dhveg-6)_None2452	0	0	0	0	0	0	0	0	0	0	0	0	5	0
Arc;_Euryarchaeota;_Halobacteria;_Halobacteriales;_Deep_sea_hydrothermal_vent_gp_6(dhveg-6)_None2454	0	0	0	0	0	0	0	5	0	0	0	0	0	0
Arc;_Euryarchaeota;_Halobacteria;_Halobacteriales;_Deep_sea_hydrothermal_vent_gp_6(dhveg-6)_None2458	0	0	0	0	1	0	0	0	0	0	2	0	1	0
Arc;_Euryarchaeota;_Halobacteria;_Halobacteriales;_Deep_sea_hydrothermal_vent_gp_6(dhveg-6)_None2459	0	0	0	0	0	0	0	3	0	0	0	0	0	0
Arc;_Euryarchaeota;_Halobacteria;_Halobacteriales;_Deep_sea_hydrothermal_vent_gp_6(dhveg-6)_None2460	0	0	0	0	0	0	0	1	0	1	0	0	0	0
Arc;_Euryarchaeota;_Halobacteria;_Halobacteriales;_Deep_sea_hydrothermal_vent_gp_6(dhveg-6)_None2461	0	1	0	0	1	0	5	7	3	0	0	3	0	0
Arc;_Euryarchaeota;_Halobacteria;_Halobacteriales;_Deep_sea_hydrothermal_vent_gp_6(dhveg-6)_None2462	0	0	0	0	0	0	0	0	0	0	0	0	1	0
Arc;_Euryarchaeota;_Halobacteria;_Halobacteriales;_Deep_sea_hydrothermal_vent_gp_6(dhveg-6)_None2465	0	1	0	0	1	6	16	24	11	2	3	17	2	0
Arc;_Euryarchaeota;_Halobacteria;_Halobacteriales;_Deep_sea_hydrothermal_vent_gp_6(dhveg-6)_None2468	0	0	0	0	0	0	0	1	0	0	0	0	1	0
Arc;_Euryarchaeota;_Halobacteria;_Halobacteriales;_Deep_sea_hydrothermal_vent_gp_6(dhveg-6)_None247	0	0	0	0	0	0	0	0	2	0	0	0	2	0
Arc;_Euryarchaeota;_Halobacteria;_Halobacteriales;_Deep_sea_hydrothermal_vent_gp_6(dhveg-6)_None2470	0	0	0	0	0	1	0	0	0	0	0	0	0	0
Arc;_Euryarchaeota;_Halobacteria;_Halobacteriales;_Deep_sea_hydrothermal_vent_gp_6(dhveg-6)_None2471	0	0	0	0	0	0	1	0	0	0	0	0	0	0
Arc;_Euryarchaeota;_Halobacteria;_Halobacteriales;_Deep_sea_hydrothermal_vent_gp_6(dhveg-6)_None2472	0	0	0	0	0	2	0	0	0	0	0	0	0	0
Arc;_Euryarchaeota;_Halobacteria;_Halobacteriales;_Deep_sea_hydrothermal_vent_gp_6(dhveg-6)_None2474	0	0	0	0	0	0	1	0	0	0	0	1	0	0
Arc;_Euryarchaeota;_Halobacteria;_Halobacteriales;_Deep_sea_hydrothermal_vent_gp_6(dhveg-6)_None2475	5	0	0	0	0	0	0	0	0	0	0	0	0	0
Arc;_Euryarchaeota;_Halobacteria;_Halobacteriales;_Deep_sea_hydrothermal_vent_gp_6(dhveg-6)_None2478	0	11	1	0	20	0	7	1	23	0	0	99	0	0
Arc;_Euryarchaeota;_Halobacteria;_Halobacteriales;_Deep_sea_hydrothermal_vent_gp_6(dhveg-6)_None248	0	0	0	0	0	0	0	0	0	0	0	0	1	0
Arc;_Euryarchaeota;_Halobacteria;_Halobacteriales;_Deep_sea_hydrothermal_vent_gp_6(dhveg-6)_None2480	0	0	0	0	0	0	0	0	0	0	0	0	4	0
Arc;_Euryarchaeota;_Halobacteria;_Halobacteriales;_Deep_sea_hydrothermal_vent_gp_6(dhveg-6)_None2481	0	0	0	0	1	0	0	0	0	0	0	0	0	0
Arc;_Euryarchaeota;_Halobacteria;_Halobacteriales;_Deep_sea_hydrothermal_vent_gp_6(dhveg-6)_None2483	0	0	0	0	0	0	0	0	1	0	0	0	0	0
Arc;_Euryarchaeota;_Halobacteria;_Halobacteriales;_Deep_sea_hydrothermal_vent_gp_6(dhveg-6)_None2484	0	0	0	0	0	0	0	1	3	0	0	0	0	0
Arc;_Euryarchaeota;_Halobacteria;_Halobacteriales;_Deep_sea_hydrothermal_vent_gp_6(dhveg-6)_None2486	0	0	0	0	0	0	0	1	6	0	0	0	0	0
Arc;_Euryarchaeota;_Halobacteria;_Halobacteriales;_Deep_sea_hydrothermal_vent_gp_6(dhveg-6)_None2487	0	0	0	0	0	1	0	0	6	6	0	0	0	0
Arc;_Euryarchaeota;_Halobacteria;_Halobacteriales;_Deep_sea_hydrothermal_vent_gp_6(dhveg-6)_None2488	0	0	0	0	0	1	0	0	0	0	0	0	0	0
Arc;_Euryarchaeota;_Halobacteria;_Halobacteriales;_Deep_sea_hydrothermal_vent_gp_6(dhveg-6)_None249	0	0	0	0	0	0	0	0	0	0	0	3	0	0
Arc;_Euryarchaeota;_Halobacteria;_Halobacteriales;_Deep_sea_hydrothermal_vent_gp_6(dhveg-6)_None2490	0	0	0	0	0	0	0	0	11	0	0	0	14	0
Arc;_Euryarchaeota;_Halobacteria;_Halobacteriales;_Deep_sea_hydrothermal_vent_gp_6(dhveg-6)_None2491	0	0	0	0	0	0	0	1	0	0	0	0	0	0
Arc;_Euryarchaeota;_Halobacteria;_Halobacteriales;_Deep_sea_hydrothermal_vent_gp_6(dhveg-6)_None2492	0	1	0	0	0	0	0	6	0	4	0	0	0	1
Arc;_Euryarchaeota;_Halobacteria;_Halobacteriales;_Deep_sea_hydrothermal_vent_gp_6(dhveg-6)_None2494	0	0	0	0	0	0	0	1	0	0	0	0	0	0
Arc;_Euryarchaeota;_Halobacteria;_Halobacteriales;_Deep_sea_hydrothermal_vent_gp_6(dhveg-6)_None2495	0	0	0	0	0	0	0	0	1	0	0	1	0	0
Arc;_Euryarchaeota;_Halobacteria;_Halobacteriales;_Deep_sea_hydrothermal_vent_gp_6(dhveg-6)_None2496	0	0	0	0	0	2	0	0	0	0	0	0	0	0
Arc;_Euryarchaeota;_Halobacteria;_Halobacteriales;_Deep_sea_hydrothermal_vent_gp_6(dhveg-6)_None2498	4	1	0	0	0	0	0	0	0	1	0	0	0	0
Arc;_Euryarchaeota;_Halobacteria;_Halobacteriales;_Deep_sea_hydrothermal_vent_gp_6(dhveg-6)_None2501	0	0	0	0	0	0	1	0	0	0	0	0	0	0
Arc;_Euryarchaeota;_Halobacteria;_Halobacteriales;_Deep_sea_hydrothermal_vent_gp_6(dhveg-6)_None2504	0	0	0	0	2	15	2	1	6	2	9	14	25	0
Arc;_Euryarchaeota;_Halobacteria;_Halobacteriales;_Deep_sea_hydrothermal_vent_gp_6(dhveg-6)_None2506	0	0	0	0	0	22	1	3	1	0	0	0	0	0
Arc;_Euryarchaeota;_Halobacteria;_Halobacteriales;_Deep_sea_hydrothermal_vent_gp_6(dhveg-6)_None2507	0	0	0	0	0	0	0	2	0	0	0	0	0	0
Arc;_Euryarchaeota;_Halobacteria;_Halobacteriales;_Deep_sea_hydrothermal_vent_gp_6(dhveg-6)_None2512	0	0	0	0	0	0	0	0	4	0	0	0	0	0
Arc;_Euryarchaeota;_Halobacteria;_Halobacteriales;_Deep_sea_hydrothermal_vent_gp_6(dhveg-6)_None2514	0	0	0	0	0	0	0	0	1	0	0	0	0	0
Arc;_Euryarchaeota;_Halobacteria;_Halobacteriales;_Deep_sea_hydrothermal_vent_gp_6(dhveg-6)_None2517	0	0	0	0	0	0	0	0	0	0	0	0	1	0
Arc;_Euryarchaeota;_Halobacteria;_Halobacteriales;_Deep_sea_hydrothermal_vent_gp_6(dhveg-6)_None2518	0	0	0	0	0	0	1	8	0	0	0	1	0	0
Arc;_Euryarchaeota;_Halobacteria;_Halobacteriales;_Deep_sea_hydrothermal_vent_gp_6(dhveg-6)_None2519	0	0	0	0	0	0	1	0	0	0	0	0	0	0
Arc;_Euryarchaeota;_Halobacteria;_Halobacteriales;_Deep_sea_hydrothermal_vent_gp_6(dhveg-6)_None2524	0	0	0	0	0	0	0	0	0	0	0	0	1	0
Arc;_Euryarchaeota;_Halobacteria;_Halobacteriales;_Deep_sea_hydrothermal_vent_gp_6(dhveg-6)_None2525	3	2	0	0	0	3	0	1	0	0	0	0	0	0
Arc;_Euryarchaeota;_Halobacteria;_Halobacteriales;_Deep_sea_hydrothermal_vent_gp_6(dhveg-6)_None2527	0	0	0	0	0	1	0	9	0	0	0	0	1	0
Arc;_Euryarchaeota;_Halobacteria;_Halobacteriales;_Deep_sea_hydrothermal_vent_gp_6(dhveg-6)_None253	0	0	0	0	0	0	0	5	0	0	0	0	0	0
Arc;_Euryarchaeota;_Halobacteria;_Halobacteriales;_Deep_sea_hydrothermal_vent_gp_6(dhveg-6)_None2530	0	0	16	0	0	0	0	0	0	0	0	0	0	0
Arc;_Euryarchaeota;_Halobacteria;_Halobacteriales;_Deep_sea_hydrothermal_vent_gp_6(dhveg-6)_None2531	0	0	0	0	0	0	0	0	0	0	0	1	0	0
Arc;_Euryarchaeota;_Halobacteria;_Halobacteriales;_Deep_sea_hydrothermal_vent_gp_6(dhveg-6)_None2533	0	0	0	0	0	0	0	0	0	0	0	0	0	2
Arc;_Euryarchaeota;_Halobacteria;_Halobacteriales;_Deep_sea_hydrothermal_vent_gp_6(dhveg-6)_None2534	0	0	0	0	0	1	5	9	3	0	0	0	1	0
Arc;_Euryarchaeota;_Halobacteria;_Halobacteriales;_Deep_sea_hydrothermal_vent_gp_6(dhveg-6)_None2537	0	0	0	0	2	0	0	0	0	0	0	0	0	0
Arc;_Euryarchaeota;_Halobacteria;_Halobacteriales;_Deep_sea_hydrothermal_vent_gp_6(dhveg-6)_None2538	0	0	1	2	3	8	2	9	11	0	4	0	2	0
Arc;_Euryarchaeota;_Halobacteria;_Halobacteriales;_Deep_sea_hydrothermal_vent_gp_6(dhveg-6)_None2539	0	1	0	0	0	0	0	4	2	4	2	0	1	0
Arc;_Euryarchaeota;_Halobacteria;_Halobacteriales;_Deep_sea_hydrothermal_vent_gp_6(dhveg-6)_None2540	0	0	0	0	0	5	0	0	0	0	0	0	0	0
Arc;_Euryarchaeota;_Halobacteria;_Halobacteriales;_Deep_sea_hydrothermal_vent_gp_6(dhveg-6)_None2543	0	0	0	0	0	0	0	6	0	0	0	0	0	0
Arc;_Euryarchaeota;_Halobacteria;_Halobacteriales;_Deep_sea_hydrothermal_vent_gp_6(dhveg-6)_None2545	0	0	0	0	0	1	0	0	0	0	0	0	0	0
Arc;_Euryarchaeota;_Halobacteria;_Halobacteriales;_Deep_sea_hydrothermal_vent_gp_6(dhveg-6)_None255	0	0	0	0	0	0	0	0	0	0	0	0	1	0
Arc;_Euryarchaeota;_Halobacteria;_Halobacteriales;_Deep_sea_hydrothermal_vent_gp_6(dhveg-6)_None2550	0	6	0	0	0	0	0	0	0	0	0	0	0	0
Arc;_Euryarchaeota;_Halobacteria;_Halobacteriales;_Deep_sea_hydrothermal_vent_gp_6(dhveg-6)_None2553	0	0	0	0	0	5	0	3	2	0	0	0	1	0
Arc;_Euryarchaeota;_Halobacteria;_Halobacteriales;_Deep_sea_hydrothermal_vent_gp_6(dhveg-6)_None2557	0	1	0	0	0	0	0	0	0	0	0	0	0	0
Arc;_Euryarchaeota;_Halobacteria;_Halobacteriales;_Deep_sea_hydrothermal_vent_gp_6(dhveg-6)_None2558	0	0	0	0	1	0	0	0	0	0	0	0	0	0
Arc;_Euryarchaeota;_Halobacteria;_Halobacteriales;_Deep_sea_hydrothermal_vent_gp_6(dhveg-6)_None2559	0	3	0	0	0	0	0	0	0	0	0	0	0	0
Arc;_Euryarchaeota;_Halobacteria;_Halobacteriales;_Deep_sea_hydrothermal_vent_gp_6(dhveg-6)_None2560	0	0	1	0	0	0	0	0	0	1	0	0	0	0
Arc;_Euryarchaeota;_Halobacteria;_Halobacteriales;_Deep_sea_hydrothermal_vent_gp_6(dhveg-6)_None2561	0	1	0	0	0	0	0	0	0	0	0	0	0	0
Arc;_Euryarchaeota;_Halobacteria;_Halobacteriales;_Deep_sea_hydrothermal_vent_gp_6(dhveg-6)_None2563	0	1	0	0	1	0	0	2	4	0	0	0	1	0
Arc;_Euryarchaeota;_Halobacteria;_Halobacteriales;_Deep_sea_hydrothermal_vent_gp_6(dhveg-6)_None2564	0	3	0	0	2	0	0	0	5	0	0	0	0	0
Arc;_Euryarchaeota;_Halobacteria;_Halobacteriales;_Deep_sea_hydrothermal_vent_gp_6(dhveg-6)_None2566	0	0	0	0	0	0	0	0	0	0	0	11	0	0
Arc;_Euryarchaeota;_Halobacteria;_Halobacteriales;_Deep_sea_hydrothermal_vent_gp_6(dhveg-6)_None2567	0	0	0	0	0	0	0	1	0	0	0	0	0	0
Arc;_Euryarchaeota;_Halobacteria;_Halobacteriales;_Deep_sea_hydrothermal_vent_gp_6(dhveg-6)_None2568	0	1	0	0	0	0	0	0	0	0	0	0	0	0
Arc;_Euryarchaeota;_Halobacteria;_Halobacteriales;_Deep_sea_hydrothermal_vent_gp_6(dhveg-6)_None2569	0	0	0	0	0	0	0	3	2	0	0	10	0	0
Arc;_Euryarchaeota;_Halobacteria;_Halobacteriales;_Deep_sea_hydrothermal_vent_gp_6(dhveg-6)_None257	0	0	0	0	0	0	0	0	1	0	0	0	0	0
Arc;_Euryarchaeota;_Halobacteria;_Halobacteriales;_Deep_sea_hydrothermal_vent_gp_6(dhveg-6)_None2571	0	0	0	0	0	0	0	0	1	0	0	0	0	0
Arc;_Euryarchaeota;_Halobacteria;_Halobacteriales;_Deep_sea_hydrothermal_vent_gp_6(dhveg-6)_None2572	14	0	0	0	3	9	8	8	6	0	0	0	7	3
Arc;_Euryarchaeota;_Halobacteria;_Halobacteriales;_Deep_sea_hydrothermal_vent_gp_6(dhveg-6)_None2573	3	19	0	10	3	5	7	3	3	0	0	0	7	0
Arc;_Euryarchaeota;_Halobacteria;_Halobacteriales;_Deep_sea_hydrothermal_vent_gp_6(dhveg-6)_None2574	0	0	0	0	0	0	0	1	1	0	0	0	0	0
Arc;_Euryarchaeota;_Halobacteria;_Halobacteriales;_Deep_sea_hydrothermal_vent_gp_6(dhveg-6)_None2575	0	0	0	0	0	0	0	0	0	0	1	0	0	0
Arc;_Euryarchaeota;_Halobacteria;_Halobacteriales;_Deep_sea_hydrothermal_vent_gp_6(dhveg-6)_None2576	0	0	0	0	0	0	0	0	1	0	0	0	0	0
Arc;_Euryarchaeota;_Halobacteria;_Halobacteriales;_Deep_sea_hydrothermal_vent_gp_6(dhveg-6)_None2577	0	0	0	0	0	0	0	0	4	0	0	0	2	0
Arc;_Euryarchaeota;_Halobacteria;_Halobacteriales;_Deep_sea_hydrothermal_vent_gp_6(dhveg-6)_None2578	0	0	0	0	1	0	0	0	0	0	0	0	0	0
Arc;_Euryarchaeota;_Halobacteria;_Halobacteriales;_Deep_sea_hydrothermal_vent_gp_6(dhveg-6)_None2579	0	4	225	2	2	16	48	72	17	4	22	22	8	0
Arc;_Euryarchaeota;_Halobacteria;_Halobacteriales;_Deep_sea_hydrothermal_vent_gp_6(dhveg-6)_None2580	3	0	0	0	0	0	0	0	0	0	0	0	0	0
Arc;_Euryarchaeota;_Halobacteria;_Halobacteriales;_Deep_sea_hydrothermal_vent_gp_6(dhveg-6)_None2581	0	0	0	0	5	20	1	22	16	3	0	0	0	0
Arc;_Euryarchaeota;_Halobacteria;_Halobacteriales;_Deep_sea_hydrothermal_vent_gp_6(dhveg-6)_None2582	1	0	0	0	1	0	0	1	1	0	7	7	0	1
Arc;_Euryarchaeota;_Halobacteria;_Halobacteriales;_Deep_sea_hydrothermal_vent_gp_6(dhveg-6)_None2586	0	0	0	0	0	0	0	0	0	0	0	0	2	0
Arc;_Euryarchaeota;_Halobacteria;_Halobacteriales;_Deep_sea_hydrothermal_vent_gp_6(dhveg-6)_None2587	0	1	0	0	0	0	0	0	0	0	0	0	0	0
Arc;_Euryarchaeota;_Halobacteria;_Halobacteriales;_Deep_sea_hydrothermal_vent_gp_6(dhveg-6)_None2588	0	0	0	0	0	0	0	0	0	0	0	0	3	0
Arc;_Euryarchaeota;_Halobacteria;_Halobacteriales;_Deep_sea_hydrothermal_vent_gp_6(dhveg-6)_None2589	0	0	4	0	0	0	3	4	0	0	0	0	0	0
Arc;_Euryarchaeota;_Halobacteria;_Halobacteriales;_Deep_sea_hydrothermal_vent_gp_6(dhveg-6)_None2590	0	0	0	0	0	4	14	9	1	0	0	26	0	0
Arc;_Euryarchaeota;_Halobacteria;_Halobacteriales;_Deep_sea_hydrothermal_vent_gp_6(dhveg-6)_None2594	0	0	0	0	0	0	0	0	0	0	0	0	1	0
Arc;_Euryarchaeota;_Halobacteria;_Halobacteriales;_Deep_sea_hydrothermal_vent_gp_6(dhveg-6)_None260	0	0	0	0	0	2	0	9	0	5	3	0	0	0
Arc;_Euryarchaeota;_Halobacteria;_Halobacteriales;_Deep_sea_hydrothermal_vent_gp_6(dhveg-6)_None2600	0	0	0	0	0	4	0	0	0	0	0	0	0	0
Arc;_Euryarchaeota;_Halobacteria;_Halobacteriales;_Deep_sea_hydrothermal_vent_gp_6(dhveg-6)_None2601	0	0	0	0	1	0	0	0	0	0	0	0	0	0
Arc;_Euryarchaeota;_Halobacteria;_Halobacteriales;_Deep_sea_hydrothermal_vent_gp_6(dhveg-6)_None2603	0	1	0	0	0	0	0	0	0	0	0	0	0	0
Arc;_Euryarchaeota;_Halobacteria;_Halobacteriales;_Deep_sea_hydrothermal_vent_gp_6(dhveg-6)_None2606	0	0	0	0	0	0	0	0	0	0	0	0	1	0
Arc;_Euryarchaeota;_Halobacteria;_Halobacteriales;_Deep_sea_hydrothermal_vent_gp_6(dhveg-6)_None2607	0	0	0	0	0	1	0	0	0	0	0	0	0	0
Arc;_Euryarchaeota;_Halobacteria;_Halobacteriales;_Deep_sea_hydrothermal_vent_gp_6(dhveg-6)_None2608	0	0	0	0	0	0	0	8	0	0	0	0	0	0
Arc;_Euryarchaeota;_Halobacteria;_Halobacteriales;_Deep_sea_hydrothermal_vent_gp_6(dhveg-6)_None2609	0	0	0	0	0	0	0	3	0	0	0	0	0	0
Arc;_Euryarchaeota;_Halobacteria;_Halobacteriales;_Deep_sea_hydrothermal_vent_gp_6(dhveg-6)_None2611	0	0	0	0	0	0	0	0	3	0	0	0	9	0
Arc;_Euryarchaeota;_Halobacteria;_Halobacteriales;_Deep_sea_hydrothermal_vent_gp_6(dhveg-6)_None2613	0	0	0	0	0	0	0	0	0	0	0	0	1	0
Arc;_Euryarchaeota;_Halobacteria;_Halobacteriales;_Deep_sea_hydrothermal_vent_gp_6(dhveg-6)_None2615	0	0	0	0	0	0	0	3	0	0	0	0	2	0
Arc;_Euryarchaeota;_Halobacteria;_Halobacteriales;_Deep_sea_hydrothermal_vent_gp_6(dhveg-6)_None2616	0	5	0	0	0	2	3	7	0	0	0	0	1	0
Arc;_Euryarchaeota;_Halobacteria;_Halobacteriales;_Deep_sea_hydrothermal_vent_gp_6(dhveg-6)_None2617	0	0	0	0	0	1	0	1	0	0	0	0	0	0
Arc;_Euryarchaeota;_Halobacteria;_Halobacteriales;_Deep_sea_hydrothermal_vent_gp_6(dhveg-6)_None2621	0	0	0	0	0	0	0	2	0	0	0	0	0	1
Arc;_Euryarchaeota;_Halobacteria;_Halobacteriales;_Deep_sea_hydrothermal_vent_gp_6(dhveg-6)_None2623	0	1	0	0	3	0	0	0	3	0	0	0	2	2
Arc;_Euryarchaeota;_Halobacteria;_Halobacteriales;_Deep_sea_hydrothermal_vent_gp_6(dhveg-6)_None2625	0	0	0	0	0	0	0	1	0	0	0	0	0	0
Arc;_Euryarchaeota;_Halobacteria;_Halobacteriales;_Deep_sea_hydrothermal_vent_gp_6(dhveg-6)_None2626	0	0	0	0	0	0	0	0	0	0	0	0	1	0
Arc;_Euryarchaeota;_Halobacteria;_Halobacteriales;_Deep_sea_hydrothermal_vent_gp_6(dhveg-6)_None2628	0	0	0	0	1	1	0	0	1	0	0	0	0	0
Arc;_Euryarchaeota;_Halobacteria;_Halobacteriales;_Deep_sea_hydrothermal_vent_gp_6(dhveg-6)_None2629	0	0	0	0	1	2	0	2	1	0	3	0	3	0
Arc;_Euryarchaeota;_Halobacteria;_Halobacteriales;_Deep_sea_hydrothermal_vent_gp_6(dhveg-6)_None2633	0	0	0	0	0	0	0	0	0	0	0	0	4	0
Arc;_Euryarchaeota;_Halobacteria;_Halobacteriales;_Deep_sea_hydrothermal_vent_gp_6(dhveg-6)_None2634	0	0	0	0	2	0	0	0	0	0	0	0	0	0
Arc;_Euryarchaeota;_Halobacteria;_Halobacteriales;_Deep_sea_hydrothermal_vent_gp_6(dhveg-6)_None2636	7	0	0	0	0	8	17	7	1	12	0	0	13	0
Arc;_Euryarchaeota;_Halobacteria;_Halobacteriales;_Deep_sea_hydrothermal_vent_gp_6(dhveg-6)_None2637	0	0	0	0	1	0	0	0	0	0	0	0	0	0
Arc;_Euryarchaeota;_Halobacteria;_Halobacteriales;_Deep_sea_hydrothermal_vent_gp_6(dhveg-6)_None2639	0	0	0	0	0	0	0	0	7	5	0	2	3	0
Arc;_Euryarchaeota;_Halobacteria;_Halobacteriales;_Deep_sea_hydrothermal_vent_gp_6(dhveg-6)_None264	0	0	0	0	0	0	0	2	0	0	0	0	0	0
Arc;_Euryarchaeota;_Halobacteria;_Halobacteriales;_Deep_sea_hydrothermal_vent_gp_6(dhveg-6)_None2640	0	1	0	0	5	0	0	1	6	0	0	5	8	1
Arc;_Euryarchaeota;_Halobacteria;_Halobacteriales;_Deep_sea_hydrothermal_vent_gp_6(dhveg-6)_None2643	0	0	0	0	0	0	0	1	0	0	0	0	0	0
Arc;_Euryarchaeota;_Halobacteria;_Halobacteriales;_Deep_sea_hydrothermal_vent_gp_6(dhveg-6)_None2645	0	0	0	0	2	0	0	0	0	0	0	0	0	0
Arc;_Euryarchaeota;_Halobacteria;_Halobacteriales;_Deep_sea_hydrothermal_vent_gp_6(dhveg-6)_None2646	0	0	0	0	0	0	0	1	0	0	0	0	0	0
Arc;_Euryarchaeota;_Halobacteria;_Halobacteriales;_Deep_sea_hydrothermal_vent_gp_6(dhveg-6)_None2647	0	0	0	0	0	0	0	0	0	0	0	0	2	0
Arc;_Euryarchaeota;_Halobacteria;_Halobacteriales;_Deep_sea_hydrothermal_vent_gp_6(dhveg-6)_None2651	0	0	0	0	1	0	0	0	1	0	0	0	0	0
Arc;_Euryarchaeota;_Halobacteria;_Halobacteriales;_Deep_sea_hydrothermal_vent_gp_6(dhveg-6)_None2652	0	1	0	0	0	0	0	0	2	0	0	0	0	0
Arc;_Euryarchaeota;_Halobacteria;_Halobacteriales;_Deep_sea_hydrothermal_vent_gp_6(dhveg-6)_None2653	0	0	0	0	0	0	0	0	1	0	0	0	1	0
Arc;_Euryarchaeota;_Halobacteria;_Halobacteriales;_Deep_sea_hydrothermal_vent_gp_6(dhveg-6)_None2654	0	0	0	0	3	0	0	0	0	0	0	0	0	0
Arc;_Euryarchaeota;_Halobacteria;_Halobacteriales;_Deep_sea_hydrothermal_vent_gp_6(dhveg-6)_None2655	0	0	0	0	0	0	0	0	0	0	0	0	3	0
Arc;_Euryarchaeota;_Halobacteria;_Halobacteriales;_Deep_sea_hydrothermal_vent_gp_6(dhveg-6)_None2656	0	1	3	0	3	8	0	2	1	0	0	0	1	0
Arc;_Euryarchaeota;_Halobacteria;_Halobacteriales;_Deep_sea_hydrothermal_vent_gp_6(dhveg-6)_None2660	0	0	0	0	0	0	1	0	0	0	0	0	0	0
Arc;_Euryarchaeota;_Halobacteria;_Halobacteriales;_Deep_sea_hydrothermal_vent_gp_6(dhveg-6)_None2664	0	0	0	0	0	1	0	0	0	0	0	0	0	0
Arc;_Euryarchaeota;_Halobacteria;_Halobacteriales;_Deep_sea_hydrothermal_vent_gp_6(dhveg-6)_None2666	0	1	0	0	0	7	0	0	0	0	0	0	0	0
Arc;_Euryarchaeota;_Halobacteria;_Halobacteriales;_Deep_sea_hydrothermal_vent_gp_6(dhveg-6)_None2667	0	7	0	0	4	2	0	0	0	0	0	0	0	0
Arc;_Euryarchaeota;_Halobacteria;_Halobacteriales;_Deep_sea_hydrothermal_vent_gp_6(dhveg-6)_None2669	0	0	0	0	0	0	0	0	0	0	0	0	1	0
Arc;_Euryarchaeota;_Halobacteria;_Halobacteriales;_Deep_sea_hydrothermal_vent_gp_6(dhveg-6)_None2673	0	0	0	0	0	0	0	1	1	0	0	0	0	0
Arc;_Euryarchaeota;_Halobacteria;_Halobacteriales;_Deep_sea_hydrothermal_vent_gp_6(dhveg-6)_None2674	0	0	0	0	0	0	0	0	0	0	0	0	2	0
Arc;_Euryarchaeota;_Halobacteria;_Halobacteriales;_Deep_sea_hydrothermal_vent_gp_6(dhveg-6)_None2675	0	0	0	0	0	0	0	0	0	0	0	0	0	1
Arc;_Euryarchaeota;_Halobacteria;_Halobacteriales;_Deep_sea_hydrothermal_vent_gp_6(dhveg-6)_None2676	0	0	0	0	0	5	0	0	0	0	0	0	0	0
Arc;_Euryarchaeota;_Halobacteria;_Halobacteriales;_Deep_sea_hydrothermal_vent_gp_6(dhveg-6)_None2678	0	0	0	0	0	1	0	0	0	0	0	0	0	0
Arc;_Euryarchaeota;_Halobacteria;_Halobacteriales;_Deep_sea_hydrothermal_vent_gp_6(dhveg-6)_None2679	0	0	1	0	0	4	1	8	0	0	0	0	0	0
Arc;_Euryarchaeota;_Halobacteria;_Halobacteriales;_Deep_sea_hydrothermal_vent_gp_6(dhveg-6)_None2680	0	0	0	0	0	0	0	0	0	0	0	0	4	0
Arc;_Euryarchaeota;_Halobacteria;_Halobacteriales;_Deep_sea_hydrothermal_vent_gp_6(dhveg-6)_None2681	0	0	0	0	0	0	0	0	1	0	0	0	0	0
Arc;_Euryarchaeota;_Halobacteria;_Halobacteriales;_Deep_sea_hydrothermal_vent_gp_6(dhveg-6)_None2683	0	1	0	0	0	0	0	0	0	0	0	0	0	0
Arc;_Euryarchaeota;_Halobacteria;_Halobacteriales;_Deep_sea_hydrothermal_vent_gp_6(dhveg-6)_None2684	0	1	0	0	0	0	0	0	0	0	0	0	0	0
Arc;_Euryarchaeota;_Halobacteria;_Halobacteriales;_Deep_sea_hydrothermal_vent_gp_6(dhveg-6)_None2686	2	0	0	0	0	0	0	0	0	0	0	0	0	0
Arc;_Euryarchaeota;_Halobacteria;_Halobacteriales;_Deep_sea_hydrothermal_vent_gp_6(dhveg-6)_None2689	0	4	18	3	0	42	6	9	3	0	0	2	2	0
Arc;_Euryarchaeota;_Halobacteria;_Halobacteriales;_Deep_sea_hydrothermal_vent_gp_6(dhveg-6)_None269	0	0	0	0	1	0	0	0	0	0	0	0	0	0
Arc;_Euryarchaeota;_Halobacteria;_Halobacteriales;_Deep_sea_hydrothermal_vent_gp_6(dhveg-6)_None2690	0	0	0	0	0	0	0	0	2	0	0	0	0	0
Arc;_Euryarchaeota;_Halobacteria;_Halobacteriales;_Deep_sea_hydrothermal_vent_gp_6(dhveg-6)_None2691	0	0	0	0	0	0	0	0	0	0	0	0	2	0
Arc;_Euryarchaeota;_Halobacteria;_Halobacteriales;_Deep_sea_hydrothermal_vent_gp_6(dhveg-6)_None2694	0	0	0	0	0	0	0	0	4	0	0	0	0	0
Arc;_Euryarchaeota;_Halobacteria;_Halobacteriales;_Deep_sea_hydrothermal_vent_gp_6(dhveg-6)_None2695	0	0	0	0	0	0	1	0	0	0	0	0	0	0
Arc;_Euryarchaeota;_Halobacteria;_Halobacteriales;_Deep_sea_hydrothermal_vent_gp_6(dhveg-6)_None2697	0	0	0	0	0	0	0	0	1	0	0	0	1	0
Arc;_Euryarchaeota;_Halobacteria;_Halobacteriales;_Deep_sea_hydrothermal_vent_gp_6(dhveg-6)_None2698	0	0	0	0	0	0	0	0	1	0	0	0	1	0
Arc;_Euryarchaeota;_Halobacteria;_Halobacteriales;_Deep_sea_hydrothermal_vent_gp_6(dhveg-6)_None2699	0	0	0	1	0	14	9	7	1	0	0	0	3	0
Arc;_Euryarchaeota;_Halobacteria;_Halobacteriales;_Deep_sea_hydrothermal_vent_gp_6(dhveg-6)_None270	3	0	0	0	0	0	0	0	0	0	0	0	0	0
Arc;_Euryarchaeota;_Halobacteria;_Halobacteriales;_Deep_sea_hydrothermal_vent_gp_6(dhveg-6)_None2701	0	0	0	0	0	12	0	0	0	0	0	0	0	0
Arc;_Euryarchaeota;_Halobacteria;_Halobacteriales;_Deep_sea_hydrothermal_vent_gp_6(dhveg-6)_None2703	0	0	0	0	0	0	0	0	0	0	0	0	1	0
Arc;_Euryarchaeota;_Halobacteria;_Halobacteriales;_Deep_sea_hydrothermal_vent_gp_6(dhveg-6)_None2705	0	0	0	0	0	0	0	0	0	1	0	0	1	0
Arc;_Euryarchaeota;_Halobacteria;_Halobacteriales;_Deep_sea_hydrothermal_vent_gp_6(dhveg-6)_None2707	0	0	0	0	0	0	0	0	1	0	0	0	0	0
Arc;_Euryarchaeota;_Halobacteria;_Halobacteriales;_Deep_sea_hydrothermal_vent_gp_6(dhveg-6)_None2708	0	0	0	0	0	0	0	0	4	0	0	0	0	0
Arc;_Euryarchaeota;_Halobacteria;_Halobacteriales;_Deep_sea_hydrothermal_vent_gp_6(dhveg-6)_None271	0	1	0	2	5	3	0	11	5	0	0	0	1	0
Arc;_Euryarchaeota;_Halobacteria;_Halobacteriales;_Deep_sea_hydrothermal_vent_gp_6(dhveg-6)_None2718	1	0	0	0	0	1	0	0	0	0	0	0	0	0
Arc;_Euryarchaeota;_Halobacteria;_Halobacteriales;_Deep_sea_hydrothermal_vent_gp_6(dhveg-6)_None2719	0	0	0	0	0	7	0	0	0	0	0	0	0	0
Arc;_Euryarchaeota;_Halobacteria;_Halobacteriales;_Deep_sea_hydrothermal_vent_gp_6(dhveg-6)_None272	0	0	0	0	0	0	10	0	0	0	0	0	0	0
Arc;_Euryarchaeota;_Halobacteria;_Halobacteriales;_Deep_sea_hydrothermal_vent_gp_6(dhveg-6)_None2720	0	0	0	0	1	0	0	0	1	0	0	0	3	0
Arc;_Euryarchaeota;_Halobacteria;_Halobacteriales;_Deep_sea_hydrothermal_vent_gp_6(dhveg-6)_None2723	0	1	0	0	0	0	0	0	0	0	0	0	0	0
Arc;_Euryarchaeota;_Halobacteria;_Halobacteriales;_Deep_sea_hydrothermal_vent_gp_6(dhveg-6)_None2724	2	1	0	1	2	3	2	5	0	1	0	0	9	0
Arc;_Euryarchaeota;_Halobacteria;_Halobacteriales;_Deep_sea_hydrothermal_vent_gp_6(dhveg-6)_None2725	1	1	40	1	1	5	0	1	9	2	0	0	2	0
Arc;_Euryarchaeota;_Halobacteria;_Halobacteriales;_Deep_sea_hydrothermal_vent_gp_6(dhveg-6)_None2727	0	0	0	0	0	1	0	0	0	0	0	0	0	1
Arc;_Euryarchaeota;_Halobacteria;_Halobacteriales;_Deep_sea_hydrothermal_vent_gp_6(dhveg-6)_None2728	0	0	0	0	0	0	0	0	0	0	0	0	1	0
Arc;_Euryarchaeota;_Halobacteria;_Halobacteriales;_Deep_sea_hydrothermal_vent_gp_6(dhveg-6)_None2729	0	0	0	0	0	0	0	1	0	0	0	0	0	0
Arc;_Euryarchaeota;_Halobacteria;_Halobacteriales;_Deep_sea_hydrothermal_vent_gp_6(dhveg-6)_None273	0	0	0	0	1	0	0	0	0	0	0	0	0	0
Arc;_Euryarchaeota;_Halobacteria;_Halobacteriales;_Deep_sea_hydrothermal_vent_gp_6(dhveg-6)_None2730	0	0	0	0	0	0	0	0	0	0	0	0	2	0
Arc;_Euryarchaeota;_Halobacteria;_Halobacteriales;_Deep_sea_hydrothermal_vent_gp_6(dhveg-6)_None2733	2	0	0	0	0	0	0	0	0	0	0	0	0	0
Arc;_Euryarchaeota;_Halobacteria;_Halobacteriales;_Deep_sea_hydrothermal_vent_gp_6(dhveg-6)_None2735	0	0	0	0	0	9	0	2	14	0	7	92	1	0
Arc;_Euryarchaeota;_Halobacteria;_Halobacteriales;_Deep_sea_hydrothermal_vent_gp_6(dhveg-6)_None2736	0	0	0	0	0	0	0	0	0	0	0	0	1	0
Arc;_Euryarchaeota;_Halobacteria;_Halobacteriales;_Deep_sea_hydrothermal_vent_gp_6(dhveg-6)_None2738	5	1	0	0	7	2	0	4	12	1	3	5	4	0
Arc;_Euryarchaeota;_Halobacteria;_Halobacteriales;_Deep_sea_hydrothermal_vent_gp_6(dhveg-6)_None2739	0	0	0	0	0	0	0	0	0	1	0	0	0	0
Arc;_Euryarchaeota;_Halobacteria;_Halobacteriales;_Deep_sea_hydrothermal_vent_gp_6(dhveg-6)_None2743	0	0	0	0	0	0	0	0	0	0	0	0	1	0
Arc;_Euryarchaeota;_Halobacteria;_Halobacteriales;_Deep_sea_hydrothermal_vent_gp_6(dhveg-6)_None2747	1	0	0	1	1	4	0	2	4	3	0	0	2	0
Arc;_Euryarchaeota;_Halobacteria;_Halobacteriales;_Deep_sea_hydrothermal_vent_gp_6(dhveg-6)_None2748	0	0	0	0	0	0	1	0	1	0	0	0	0	0
Arc;_Euryarchaeota;_Halobacteria;_Halobacteriales;_Deep_sea_hydrothermal_vent_gp_6(dhveg-6)_None2749	0	0	0	0	0	1	0	0	0	0	0	0	0	0
Arc;_Euryarchaeota;_Halobacteria;_Halobacteriales;_Deep_sea_hydrothermal_vent_gp_6(dhveg-6)_None2751	0	1	0	0	0	8	0	2	0	0	0	0	0	0
Arc;_Euryarchaeota;_Halobacteria;_Halobacteriales;_Deep_sea_hydrothermal_vent_gp_6(dhveg-6)_None2752	1	0	0	0	0	12	0	3	0	2	0	0	0	0
Arc;_Euryarchaeota;_Halobacteria;_Halobacteriales;_Deep_sea_hydrothermal_vent_gp_6(dhveg-6)_None2755	0	0	0	0	0	0	0	0	0	0	0	0	1	0
Arc;_Euryarchaeota;_Halobacteria;_Halobacteriales;_Deep_sea_hydrothermal_vent_gp_6(dhveg-6)_None2756	1	0	0	0	0	6	0	2	0	0	0	0	0	0
Arc;_Euryarchaeota;_Halobacteria;_Halobacteriales;_Deep_sea_hydrothermal_vent_gp_6(dhveg-6)_None2757	0	0	0	0	0	0	0	1	0	0	0	0	0	0
Arc;_Euryarchaeota;_Halobacteria;_Halobacteriales;_Deep_sea_hydrothermal_vent_gp_6(dhveg-6)_None2758	0	0	0	0	0	0	0	0	3	0	0	0	2	0
Arc;_Euryarchaeota;_Halobacteria;_Halobacteriales;_Deep_sea_hydrothermal_vent_gp_6(dhveg-6)_None2759	0	2	2	0	1	0	0	2	1	4	0	0	0	1
Arc;_Euryarchaeota;_Halobacteria;_Halobacteriales;_Deep_sea_hydrothermal_vent_gp_6(dhveg-6)_None2763	0	0	0	0	0	1	0	0	0	0	0	0	0	0
Arc;_Euryarchaeota;_Halobacteria;_Halobacteriales;_Deep_sea_hydrothermal_vent_gp_6(dhveg-6)_None2764	0	0	0	0	0	0	3	2	0	0	0	0	0	0
Arc;_Euryarchaeota;_Halobacteria;_Halobacteriales;_Deep_sea_hydrothermal_vent_gp_6(dhveg-6)_None2767	2	1	0	4	3	0	2	11	18	4	0	8	27	0
Arc;_Euryarchaeota;_Halobacteria;_Halobacteriales;_Deep_sea_hydrothermal_vent_gp_6(dhveg-6)_None2769	0	1	0	0	0	4	0	0	1	2	0	0	1	0
Arc;_Euryarchaeota;_Halobacteria;_Halobacteriales;_Deep_sea_hydrothermal_vent_gp_6(dhveg-6)_None2770	0	0	0	0	0	0	0	0	6	0	0	0	16	0
Arc;_Euryarchaeota;_Halobacteria;_Halobacteriales;_Deep_sea_hydrothermal_vent_gp_6(dhveg-6)_None2771	0	0	0	0	0	3	0	0	0	2	0	0	0	0
Arc;_Euryarchaeota;_Halobacteria;_Halobacteriales;_Deep_sea_hydrothermal_vent_gp_6(dhveg-6)_None2772	0	0	0	0	0	2	0	0	0	0	0	0	0	0
Arc;_Euryarchaeota;_Halobacteria;_Halobacteriales;_Deep_sea_hydrothermal_vent_gp_6(dhveg-6)_None2776	0	1	0	0	1	0	0	0	0	0	0	0	0	0
Arc;_Euryarchaeota;_Halobacteria;_Halobacteriales;_Deep_sea_hydrothermal_vent_gp_6(dhveg-6)_None2780	0	2	0	0	0	1	0	0	0	0	0	0	0	0
Arc;_Euryarchaeota;_Halobacteria;_Halobacteriales;_Deep_sea_hydrothermal_vent_gp_6(dhveg-6)_None2781	0	0	0	0	0	0	0	0	0	0	0	0	1	0
Arc;_Euryarchaeota;_Halobacteria;_Halobacteriales;_Deep_sea_hydrothermal_vent_gp_6(dhveg-6)_None2783	0	1	0	0	1	0	0	0	0	0	0	0	0	0
Arc;_Euryarchaeota;_Halobacteria;_Halobacteriales;_Deep_sea_hydrothermal_vent_gp_6(dhveg-6)_None2784	0	0	0	0	0	0	0	0	0	0	0	3	0	0
Arc;_Euryarchaeota;_Halobacteria;_Halobacteriales;_Deep_sea_hydrothermal_vent_gp_6(dhveg-6)_None2785	0	0	0	0	0	0	0	0	0	0	0	0	1	0
Arc;_Euryarchaeota;_Halobacteria;_Halobacteriales;_Deep_sea_hydrothermal_vent_gp_6(dhveg-6)_None2788	0	0	0	0	0	2	0	0	0	0	0	0	0	0
Arc;_Euryarchaeota;_Halobacteria;_Halobacteriales;_Deep_sea_hydrothermal_vent_gp_6(dhveg-6)_None2789	0	0	0	0	0	0	0	0	0	0	0	0	1	0
Arc;_Euryarchaeota;_Halobacteria;_Halobacteriales;_Deep_sea_hydrothermal_vent_gp_6(dhveg-6)_None2793	0	0	0	0	0	0	0	0	0	0	0	0	1	0
Arc;_Euryarchaeota;_Halobacteria;_Halobacteriales;_Deep_sea_hydrothermal_vent_gp_6(dhveg-6)_None2796	0	0	0	0	0	0	0	0	0	1	0	0	0	0
Arc;_Euryarchaeota;_Halobacteria;_Halobacteriales;_Deep_sea_hydrothermal_vent_gp_6(dhveg-6)_None2798	0	0	0	0	0	0	0	0	1	0	0	0	0	0
Arc;_Euryarchaeota;_Halobacteria;_Halobacteriales;_Deep_sea_hydrothermal_vent_gp_6(dhveg-6)_None2799	0	0	0	0	0	0	1	0	0	0	0	0	0	0
Arc;_Euryarchaeota;_Halobacteria;_Halobacteriales;_Deep_sea_hydrothermal_vent_gp_6(dhveg-6)_None28	0	1	0	1	0	2	2	0	0	0	3	0	0	0
Arc;_Euryarchaeota;_Halobacteria;_Halobacteriales;_Deep_sea_hydrothermal_vent_gp_6(dhveg-6)_None2800	0	0	0	0	4	0	0	0	4	0	0	2	3	0
Arc;_Euryarchaeota;_Halobacteria;_Halobacteriales;_Deep_sea_hydrothermal_vent_gp_6(dhveg-6)_None2804	0	0	0	1	0	0	0	0	0	0	0	0	1	0
Arc;_Euryarchaeota;_Halobacteria;_Halobacteriales;_Deep_sea_hydrothermal_vent_gp_6(dhveg-6)_None2805	0	0	1	0	0	1	4	0	0	0	0	0	2	0
Arc;_Euryarchaeota;_Halobacteria;_Halobacteriales;_Deep_sea_hydrothermal_vent_gp_6(dhveg-6)_None2806	0	3	1	0	1	30	9	26	13	45	0	0	9	2
Arc;_Euryarchaeota;_Halobacteria;_Halobacteriales;_Deep_sea_hydrothermal_vent_gp_6(dhveg-6)_None2808	0	1	0	0	0	0	0	0	0	0	0	0	0	0
Arc;_Euryarchaeota;_Halobacteria;_Halobacteriales;_Deep_sea_hydrothermal_vent_gp_6(dhveg-6)_None2810	0	0	0	0	0	0	0	0	1	0	0	0	0	0
Arc;_Euryarchaeota;_Halobacteria;_Halobacteriales;_Deep_sea_hydrothermal_vent_gp_6(dhveg-6)_None2814	0	0	0	0	0	0	0	1	0	0	0	0	2	0
Arc;_Euryarchaeota;_Halobacteria;_Halobacteriales;_Deep_sea_hydrothermal_vent_gp_6(dhveg-6)_None2815	0	2	0	1	0	0	0	0	0	0	0	0	0	0
Arc;_Euryarchaeota;_Halobacteria;_Halobacteriales;_Deep_sea_hydrothermal_vent_gp_6(dhveg-6)_None2817	0	0	1	0	0	0	0	0	0	0	0	1	0	0
Arc;_Euryarchaeota;_Halobacteria;_Halobacteriales;_Deep_sea_hydrothermal_vent_gp_6(dhveg-6)_None2819	0	0	0	0	0	0	0	1	0	0	1	5	1	0
Arc;_Euryarchaeota;_Halobacteria;_Halobacteriales;_Deep_sea_hydrothermal_vent_gp_6(dhveg-6)_None282	0	1	1	1	0	3	0	4	9	0	0	14	0	0
Arc;_Euryarchaeota;_Halobacteria;_Halobacteriales;_Deep_sea_hydrothermal_vent_gp_6(dhveg-6)_None2821	0	0	0	1	0	0	0	0	0	0	0	0	0	0
Arc;_Euryarchaeota;_Halobacteria;_Halobacteriales;_Deep_sea_hydrothermal_vent_gp_6(dhveg-6)_None2822	0	0	0	0	0	0	0	0	0	0	0	0	1	0
Arc;_Euryarchaeota;_Halobacteria;_Halobacteriales;_Deep_sea_hydrothermal_vent_gp_6(dhveg-6)_None2823	0	0	1	0	0	0	1	0	0	0	0	0	0	0
Arc;_Euryarchaeota;_Halobacteria;_Halobacteriales;_Deep_sea_hydrothermal_vent_gp_6(dhveg-6)_None2824	0	0	0	0	3	3	0	0	3	0	0	0	1	0
Arc;_Euryarchaeota;_Halobacteria;_Halobacteriales;_Deep_sea_hydrothermal_vent_gp_6(dhveg-6)_None2825	0	0	0	0	0	0	0	0	0	1	0	0	0	0
Arc;_Euryarchaeota;_Halobacteria;_Halobacteriales;_Deep_sea_hydrothermal_vent_gp_6(dhveg-6)_None2826	0	3	0	0	4	5	12	1	16	1	0	8	27	4
Arc;_Euryarchaeota;_Halobacteria;_Halobacteriales;_Deep_sea_hydrothermal_vent_gp_6(dhveg-6)_None2827	1	0	0	0	0	0	0	0	0	0	0	0	0	0
Arc;_Euryarchaeota;_Halobacteria;_Halobacteriales;_Deep_sea_hydrothermal_vent_gp_6(dhveg-6)_None2828	0	0	0	0	0	3	0	4	3	0	0	0	1	2
Arc;_Euryarchaeota;_Halobacteria;_Halobacteriales;_Deep_sea_hydrothermal_vent_gp_6(dhveg-6)_None2829	0	0	0	0	2	0	0	0	0	0	0	0	0	0
Arc;_Euryarchaeota;_Halobacteria;_Halobacteriales;_Deep_sea_hydrothermal_vent_gp_6(dhveg-6)_None2834	0	0	0	0	0	1	0	0	0	0	0	0	0	0
Arc;_Euryarchaeota;_Halobacteria;_Halobacteriales;_Deep_sea_hydrothermal_vent_gp_6(dhveg-6)_None2835	0	0	0	0	0	0	0	1	1	0	0	0	0	0
Arc;_Euryarchaeota;_Halobacteria;_Halobacteriales;_Deep_sea_hydrothermal_vent_gp_6(dhveg-6)_None2838	0	0	0	0	0	6	31	81	1	0	0	0	0	0
Arc;_Euryarchaeota;_Halobacteria;_Halobacteriales;_Deep_sea_hydrothermal_vent_gp_6(dhveg-6)_None2839	0	0	1	0	0	1	0	0	0	0	0	0	0	0
Arc;_Euryarchaeota;_Halobacteria;_Halobacteriales;_Deep_sea_hydrothermal_vent_gp_6(dhveg-6)_None284	0	0	0	0	0	0	0	0	0	0	0	0	2	0
Arc;_Euryarchaeota;_Halobacteria;_Halobacteriales;_Deep_sea_hydrothermal_vent_gp_6(dhveg-6)_None2840	3	0	0	0	0	6	0	0	6	0	0	0	0	0
Arc;_Euryarchaeota;_Halobacteria;_Halobacteriales;_Deep_sea_hydrothermal_vent_gp_6(dhveg-6)_None2841	0	0	0	0	0	2	0	0	0	0	0	0	0	0
Arc;_Euryarchaeota;_Halobacteria;_Halobacteriales;_Deep_sea_hydrothermal_vent_gp_6(dhveg-6)_None2844	0	3	0	0	0	0	0	0	0	0	0	0	0	0
Arc;_Euryarchaeota;_Halobacteria;_Halobacteriales;_Deep_sea_hydrothermal_vent_gp_6(dhveg-6)_None2845	0	0	0	0	0	9	1	6	0	0	0	0	0	0
Arc;_Euryarchaeota;_Halobacteria;_Halobacteriales;_Deep_sea_hydrothermal_vent_gp_6(dhveg-6)_None2846	0	0	1	0	0	0	0	0	0	0	0	0	0	0
Arc;_Euryarchaeota;_Halobacteria;_Halobacteriales;_Deep_sea_hydrothermal_vent_gp_6(dhveg-6)_None2847	0	0	0	0	0	0	0	0	0	0	0	0	2	0
Arc;_Euryarchaeota;_Halobacteria;_Halobacteriales;_Deep_sea_hydrothermal_vent_gp_6(dhveg-6)_None2849	0	0	0	0	0	0	0	0	0	0	0	0	5	0
Arc;_Euryarchaeota;_Halobacteria;_Halobacteriales;_Deep_sea_hydrothermal_vent_gp_6(dhveg-6)_None285	0	0	0	0	0	15	6	21	18	7	0	7	5	1
Arc;_Euryarchaeota;_Halobacteria;_Halobacteriales;_Deep_sea_hydrothermal_vent_gp_6(dhveg-6)_None2851	1	0	0	0	0	0	0	0	2	0	0	0	1	0
Arc;_Euryarchaeota;_Halobacteria;_Halobacteriales;_Deep_sea_hydrothermal_vent_gp_6(dhveg-6)_None2854	0	0	0	0	0	0	0	0	1	1	0	0	0	0
Arc;_Euryarchaeota;_Halobacteria;_Halobacteriales;_Deep_sea_hydrothermal_vent_gp_6(dhveg-6)_None2857	0	0	0	0	0	0	0	0	0	3	0	0	0	0
Arc;_Euryarchaeota;_Halobacteria;_Halobacteriales;_Deep_sea_hydrothermal_vent_gp_6(dhveg-6)_None2858	0	0	0	0	0	2	4	4	1	0	6	0	0	0
Arc;_Euryarchaeota;_Halobacteria;_Halobacteriales;_Deep_sea_hydrothermal_vent_gp_6(dhveg-6)_None2861	0	0	0	0	0	0	0	1	0	3	0	0	0	0
Arc;_Euryarchaeota;_Halobacteria;_Halobacteriales;_Deep_sea_hydrothermal_vent_gp_6(dhveg-6)_None2862	0	0	0	0	0	0	0	1	0	0	0	0	0	0
Arc;_Euryarchaeota;_Halobacteria;_Halobacteriales;_Deep_sea_hydrothermal_vent_gp_6(dhveg-6)_None2865	0	0	0	0	0	0	0	0	0	0	0	0	1	0
Arc;_Euryarchaeota;_Halobacteria;_Halobacteriales;_Deep_sea_hydrothermal_vent_gp_6(dhveg-6)_None2866	2	0	0	0	2	0	0	0	0	0	0	0	2	0
Arc;_Euryarchaeota;_Halobacteria;_Halobacteriales;_Deep_sea_hydrothermal_vent_gp_6(dhveg-6)_None2868	0	0	0	0	1	3	0	0	3	0	0	0	0	0
Arc;_Euryarchaeota;_Halobacteria;_Halobacteriales;_Deep_sea_hydrothermal_vent_gp_6(dhveg-6)_None2869	0	5	0	0	0	0	0	0	0	0	0	0	0	0
Arc;_Euryarchaeota;_Halobacteria;_Halobacteriales;_Deep_sea_hydrothermal_vent_gp_6(dhveg-6)_None2872	0	0	0	0	0	0	0	0	0	1	0	0	0	0
Arc;_Euryarchaeota;_Halobacteria;_Halobacteriales;_Deep_sea_hydrothermal_vent_gp_6(dhveg-6)_None2873	0	0	0	0	0	0	0	0	0	0	0	0	1	0
Arc;_Euryarchaeota;_Halobacteria;_Halobacteriales;_Deep_sea_hydrothermal_vent_gp_6(dhveg-6)_None2874	0	0	0	0	5	0	0	0	0	0	0	14	0	0
Arc;_Euryarchaeota;_Halobacteria;_Halobacteriales;_Deep_sea_hydrothermal_vent_gp_6(dhveg-6)_None2876	0	1	0	0	0	1	0	0	0	0	0	0	1	0
Arc;_Euryarchaeota;_Halobacteria;_Halobacteriales;_Deep_sea_hydrothermal_vent_gp_6(dhveg-6)_None2877	0	0	1	0	0	0	0	1	0	0	0	0	0	0
Arc;_Euryarchaeota;_Halobacteria;_Halobacteriales;_Deep_sea_hydrothermal_vent_gp_6(dhveg-6)_None2878	5	4	26	3	2	5	20	122	11	1	2	15	5	0
Arc;_Euryarchaeota;_Halobacteria;_Halobacteriales;_Deep_sea_hydrothermal_vent_gp_6(dhveg-6)_None288	0	0	0	0	0	1	0	0	0	0	0	0	0	0
Arc;_Euryarchaeota;_Halobacteria;_Halobacteriales;_Deep_sea_hydrothermal_vent_gp_6(dhveg-6)_None2880	0	1	0	0	0	0	0	0	0	0	0	0	0	0
Arc;_Euryarchaeota;_Halobacteria;_Halobacteriales;_Deep_sea_hydrothermal_vent_gp_6(dhveg-6)_None2882	1	0	0	0	0	0	0	0	0	0	0	0	0	0
Arc;_Euryarchaeota;_Halobacteria;_Halobacteriales;_Deep_sea_hydrothermal_vent_gp_6(dhveg-6)_None2884	0	1	1	0	0	2	3	53	7	0	0	0	5	0
Arc;_Euryarchaeota;_Halobacteria;_Halobacteriales;_Deep_sea_hydrothermal_vent_gp_6(dhveg-6)_None2886	0	0	0	0	0	2	0	0	0	0	0	0	0	0
Arc;_Euryarchaeota;_Halobacteria;_Halobacteriales;_Deep_sea_hydrothermal_vent_gp_6(dhveg-6)_None2887	0	0	0	0	0	0	0	0	0	0	0	0	1	0
Arc;_Euryarchaeota;_Halobacteria;_Halobacteriales;_Deep_sea_hydrothermal_vent_gp_6(dhveg-6)_None2888	0	0	0	0	0	0	0	0	2	0	0	0	0	0
Arc;_Euryarchaeota;_Halobacteria;_Halobacteriales;_Deep_sea_hydrothermal_vent_gp_6(dhveg-6)_None2889	0	0	0	0	0	1	0	0	0	0	0	0	0	0
Arc;_Euryarchaeota;_Halobacteria;_Halobacteriales;_Deep_sea_hydrothermal_vent_gp_6(dhveg-6)_None2890	0	0	0	0	0	0	0	0	0	0	0	1	0	0
Arc;_Euryarchaeota;_Halobacteria;_Halobacteriales;_Deep_sea_hydrothermal_vent_gp_6(dhveg-6)_None2891	0	0	0	0	0	0	0	2	0	0	0	0	0	0
Arc;_Euryarchaeota;_Halobacteria;_Halobacteriales;_Deep_sea_hydrothermal_vent_gp_6(dhveg-6)_None2892	4	1	5	0	0	9	0	17	10	1	1	0	7	0
Arc;_Euryarchaeota;_Halobacteria;_Halobacteriales;_Deep_sea_hydrothermal_vent_gp_6(dhveg-6)_None2893	0	0	0	0	0	0	0	0	0	0	0	0	1	0
Arc;_Euryarchaeota;_Halobacteria;_Halobacteriales;_Deep_sea_hydrothermal_vent_gp_6(dhveg-6)_None2894	0	0	0	0	0	0	0	0	0	0	1	0	0	0
Arc;_Euryarchaeota;_Halobacteria;_Halobacteriales;_Deep_sea_hydrothermal_vent_gp_6(dhveg-6)_None2896	0	0	0	7	4	0	0	0	0	0	0	0	1	0
Arc;_Euryarchaeota;_Halobacteria;_Halobacteriales;_Deep_sea_hydrothermal_vent_gp_6(dhveg-6)_None2897	0	0	0	0	0	0	0	0	0	1	0	0	1	0
Arc;_Euryarchaeota;_Halobacteria;_Halobacteriales;_Deep_sea_hydrothermal_vent_gp_6(dhveg-6)_None290	0	0	0	0	0	0	3	0	2	3	5	0	0	0
Arc;_Euryarchaeota;_Halobacteria;_Halobacteriales;_Deep_sea_hydrothermal_vent_gp_6(dhveg-6)_None2900	0	0	0	0	0	0	4	0	0	0	0	0	1	0
Arc;_Euryarchaeota;_Halobacteria;_Halobacteriales;_Deep_sea_hydrothermal_vent_gp_6(dhveg-6)_None2901	0	0	0	0	1	0	0	0	0	0	0	0	0	0
Arc;_Euryarchaeota;_Halobacteria;_Halobacteriales;_Deep_sea_hydrothermal_vent_gp_6(dhveg-6)_None2906	0	0	0	0	0	0	0	0	1	0	0	0	0	0
Arc;_Euryarchaeota;_Halobacteria;_Halobacteriales;_Deep_sea_hydrothermal_vent_gp_6(dhveg-6)_None2911	4	1	0	0	4	6	6	12	12	2	4	6	4	0
Arc;_Euryarchaeota;_Halobacteria;_Halobacteriales;_Deep_sea_hydrothermal_vent_gp_6(dhveg-6)_None2912	0	0	0	0	0	0	0	0	0	0	0	0	5	0
Arc;_Euryarchaeota;_Halobacteria;_Halobacteriales;_Deep_sea_hydrothermal_vent_gp_6(dhveg-6)_None2915	0	1	0	0	0	0	0	0	0	0	0	0	0	0
Arc;_Euryarchaeota;_Halobacteria;_Halobacteriales;_Deep_sea_hydrothermal_vent_gp_6(dhveg-6)_None2916	0	0	0	0	1	38	6	0	0	0	0	0	0	0
Arc;_Euryarchaeota;_Halobacteria;_Halobacteriales;_Deep_sea_hydrothermal_vent_gp_6(dhveg-6)_None292	0	0	0	0	0	0	0	0	3	0	0	0	2	0
Arc;_Euryarchaeota;_Halobacteria;_Halobacteriales;_Deep_sea_hydrothermal_vent_gp_6(dhveg-6)_None2925	0	0	0	0	0	0	0	0	0	5	0	0	14	0
Arc;_Euryarchaeota;_Halobacteria;_Halobacteriales;_Deep_sea_hydrothermal_vent_gp_6(dhveg-6)_None2926	0	2	0	0	0	0	0	0	0	0	0	0	0	0
Arc;_Euryarchaeota;_Halobacteria;_Halobacteriales;_Deep_sea_hydrothermal_vent_gp_6(dhveg-6)_None2927	0	1	0	0	0	0	0	1	0	0	0	0	0	0
Arc;_Euryarchaeota;_Halobacteria;_Halobacteriales;_Deep_sea_hydrothermal_vent_gp_6(dhveg-6)_None2929	0	0	9	1	0	0	0	1	0	4	0	0	0	0
Arc;_Euryarchaeota;_Halobacteria;_Halobacteriales;_Deep_sea_hydrothermal_vent_gp_6(dhveg-6)_None2930	0	0	3	0	0	1	0	33	2	6	18	0	0	0
Arc;_Euryarchaeota;_Halobacteria;_Halobacteriales;_Deep_sea_hydrothermal_vent_gp_6(dhveg-6)_None2931	0	0	0	0	0	4	0	0	0	0	0	0	0	0
Arc;_Euryarchaeota;_Halobacteria;_Halobacteriales;_Deep_sea_hydrothermal_vent_gp_6(dhveg-6)_None2934	1	2	0	0	1	10	3	3	6	2	0	0	4	0
Arc;_Euryarchaeota;_Halobacteria;_Halobacteriales;_Deep_sea_hydrothermal_vent_gp_6(dhveg-6)_None2938	0	0	0	0	1	8	1	0	3	0	0	0	0	0
Arc;_Euryarchaeota;_Halobacteria;_Halobacteriales;_Deep_sea_hydrothermal_vent_gp_6(dhveg-6)_None294	0	0	0	0	0	0	0	0	0	0	0	0	2	0
Arc;_Euryarchaeota;_Halobacteria;_Halobacteriales;_Deep_sea_hydrothermal_vent_gp_6(dhveg-6)_None2940	0	0	0	0	0	0	0	2	0	0	0	0	2	0
Arc;_Euryarchaeota;_Halobacteria;_Halobacteriales;_Deep_sea_hydrothermal_vent_gp_6(dhveg-6)_None2942	2	1	6	0	3	4	1	24	17	0	3	0	5	0
Arc;_Euryarchaeota;_Halobacteria;_Halobacteriales;_Deep_sea_hydrothermal_vent_gp_6(dhveg-6)_None2943	0	0	0	0	0	1	0	2	2	0	0	0	0	0
Arc;_Euryarchaeota;_Halobacteria;_Halobacteriales;_Deep_sea_hydrothermal_vent_gp_6(dhveg-6)_None2944	0	0	0	0	0	0	0	0	1	0	0	0	0	0
Arc;_Euryarchaeota;_Halobacteria;_Halobacteriales;_Deep_sea_hydrothermal_vent_gp_6(dhveg-6)_None2945	0	0	0	0	0	0	0	0	0	1	0	0	0	0
Arc;_Euryarchaeota;_Halobacteria;_Halobacteriales;_Deep_sea_hydrothermal_vent_gp_6(dhveg-6)_None2948	0	0	0	0	3	0	0	0	0	0	0	0	0	0
Arc;_Euryarchaeota;_Halobacteria;_Halobacteriales;_Deep_sea_hydrothermal_vent_gp_6(dhveg-6)_None2950	1	3	5	1	1	1	22	30	7	0	0	0	1	0
Arc;_Euryarchaeota;_Halobacteria;_Halobacteriales;_Deep_sea_hydrothermal_vent_gp_6(dhveg-6)_None2952	0	0	0	0	0	11	0	18	2	0	0	0	1	0
Arc;_Euryarchaeota;_Halobacteria;_Halobacteriales;_Deep_sea_hydrothermal_vent_gp_6(dhveg-6)_None2954	0	0	0	0	1	0	0	0	0	0	0	0	0	0
Arc;_Euryarchaeota;_Halobacteria;_Halobacteriales;_Deep_sea_hydrothermal_vent_gp_6(dhveg-6)_None2957	0	0	0	0	0	0	1	0	0	0	0	0	0	0
Arc;_Euryarchaeota;_Halobacteria;_Halobacteriales;_Deep_sea_hydrothermal_vent_gp_6(dhveg-6)_None2959	8	0	0	1	1	4	9	4	7	5	0	0	4	0
Arc;_Euryarchaeota;_Halobacteria;_Halobacteriales;_Deep_sea_hydrothermal_vent_gp_6(dhveg-6)_None296	7	8	1	4	4	58	69	564	37	21	8	0	12	4
Arc;_Euryarchaeota;_Halobacteria;_Halobacteriales;_Deep_sea_hydrothermal_vent_gp_6(dhveg-6)_None2961	0	0	0	0	0	0	0	0	0	0	0	0	5	0
Arc;_Euryarchaeota;_Halobacteria;_Halobacteriales;_Deep_sea_hydrothermal_vent_gp_6(dhveg-6)_None2963	0	0	0	0	1	0	0	0	0	0	0	0	0	0
Arc;_Euryarchaeota;_Halobacteria;_Halobacteriales;_Deep_sea_hydrothermal_vent_gp_6(dhveg-6)_None2964	0	0	0	0	0	0	0	0	0	0	0	0	1	0
Arc;_Euryarchaeota;_Halobacteria;_Halobacteriales;_Deep_sea_hydrothermal_vent_gp_6(dhveg-6)_None2965	0	0	0	0	0	0	0	0	0	0	0	0	3	0
Arc;_Euryarchaeota;_Halobacteria;_Halobacteriales;_Deep_sea_hydrothermal_vent_gp_6(dhveg-6)_None2967	0	1	0	0	0	0	0	0	0	0	0	0	0	0
Arc;_Euryarchaeota;_Halobacteria;_Halobacteriales;_Deep_sea_hydrothermal_vent_gp_6(dhveg-6)_None2971	0	0	0	0	0	0	0	0	0	0	0	0	4	0
Arc;_Euryarchaeota;_Halobacteria;_Halobacteriales;_Deep_sea_hydrothermal_vent_gp_6(dhveg-6)_None2972	0	0	1	0	1	3	30	36	2	2	1	0	0	0
Arc;_Euryarchaeota;_Halobacteria;_Halobacteriales;_Deep_sea_hydrothermal_vent_gp_6(dhveg-6)_None2975	0	0	0	0	0	2	0	2	3	0	0	1	0	0
Arc;_Euryarchaeota;_Halobacteria;_Halobacteriales;_Deep_sea_hydrothermal_vent_gp_6(dhveg-6)_None2976	0	1	0	0	0	0	0	0	0	0	0	0	0	0
Arc;_Euryarchaeota;_Halobacteria;_Halobacteriales;_Deep_sea_hydrothermal_vent_gp_6(dhveg-6)_None2977	2	0	0	0	0	4	9	1	0	0	0	0	1	0
Arc;_Euryarchaeota;_Halobacteria;_Halobacteriales;_Deep_sea_hydrothermal_vent_gp_6(dhveg-6)_None2978	0	0	0	0	2	18	6	17	4	8	0	0	5	0
Arc;_Euryarchaeota;_Halobacteria;_Halobacteriales;_Deep_sea_hydrothermal_vent_gp_6(dhveg-6)_None2979	3	0	0	0	0	3	7	5	17	0	0	0	0	0
Arc;_Euryarchaeota;_Halobacteria;_Halobacteriales;_Deep_sea_hydrothermal_vent_gp_6(dhveg-6)_None298	0	0	0	0	0	0	1	0	0	1	2	0	0	0
Arc;_Euryarchaeota;_Halobacteria;_Halobacteriales;_Deep_sea_hydrothermal_vent_gp_6(dhveg-6)_None2981	2	2	0	0	10	34	8	82	38	9	8	3	9	0
Arc;_Euryarchaeota;_Halobacteria;_Halobacteriales;_Deep_sea_hydrothermal_vent_gp_6(dhveg-6)_None2985	0	0	0	0	0	0	3	1	0	0	2	0	0	0
Arc;_Euryarchaeota;_Halobacteria;_Halobacteriales;_Deep_sea_hydrothermal_vent_gp_6(dhveg-6)_None2986	1	1	0	0	0	0	0	0	0	0	0	0	0	0
Arc;_Euryarchaeota;_Halobacteria;_Halobacteriales;_Deep_sea_hydrothermal_vent_gp_6(dhveg-6)_None299	0	1	0	0	0	0	0	0	0	0	0	0	0	0
Arc;_Euryarchaeota;_Halobacteria;_Halobacteriales;_Deep_sea_hydrothermal_vent_gp_6(dhveg-6)_None2990	0	1	0	1	3	1	0	4	0	0	0	0	0	0
Arc;_Euryarchaeota;_Halobacteria;_Halobacteriales;_Deep_sea_hydrothermal_vent_gp_6(dhveg-6)_None2992	0	0	0	0	0	0	0	0	0	0	0	2	0	0
Arc;_Euryarchaeota;_Halobacteria;_Halobacteriales;_Deep_sea_hydrothermal_vent_gp_6(dhveg-6)_None2993	0	0	0	0	1	0	0	0	0	0	0	0	0	0
Arc;_Euryarchaeota;_Halobacteria;_Halobacteriales;_Deep_sea_hydrothermal_vent_gp_6(dhveg-6)_None2994	0	0	0	0	0	0	0	0	0	0	0	0	1	0
Arc;_Euryarchaeota;_Halobacteria;_Halobacteriales;_Deep_sea_hydrothermal_vent_gp_6(dhveg-6)_None2995	0	0	0	0	0	0	0	6	1	0	0	0	0	0
Arc;_Euryarchaeota;_Halobacteria;_Halobacteriales;_Deep_sea_hydrothermal_vent_gp_6(dhveg-6)_None2999	21	1	1	4	6	40	3	12	12	16	10	0	10	2
Arc;_Euryarchaeota;_Halobacteria;_Halobacteriales;_Deep_sea_hydrothermal_vent_gp_6(dhveg-6)_None3	0	0	0	0	0	0	2	0	0	1	0	0	0	0
Arc;_Euryarchaeota;_Halobacteria;_Halobacteriales;_Deep_sea_hydrothermal_vent_gp_6(dhveg-6)_None30	0	5	0	0	2	8	0	6	0	0	0	0	0	0
Arc;_Euryarchaeota;_Halobacteria;_Halobacteriales;_Deep_sea_hydrothermal_vent_gp_6(dhveg-6)_None300	0	0	0	0	0	0	0	4	0	0	0	0	0	0
Arc;_Euryarchaeota;_Halobacteria;_Halobacteriales;_Deep_sea_hydrothermal_vent_gp_6(dhveg-6)_None3002	0	0	0	0	0	0	0	0	0	0	0	0	2	0
Arc;_Euryarchaeota;_Halobacteria;_Halobacteriales;_Deep_sea_hydrothermal_vent_gp_6(dhveg-6)_None3005	0	0	0	0	0	0	0	0	0	0	0	0	2	0
Arc;_Euryarchaeota;_Halobacteria;_Halobacteriales;_Deep_sea_hydrothermal_vent_gp_6(dhveg-6)_None3006	1	12	11	7	3	13	18	8	22	3	1	17	17	2
Arc;_Euryarchaeota;_Halobacteria;_Halobacteriales;_Deep_sea_hydrothermal_vent_gp_6(dhveg-6)_None3007	0	0	0	2	0	0	2	17	5	0	0	14	0	0
Arc;_Euryarchaeota;_Halobacteria;_Halobacteriales;_Deep_sea_hydrothermal_vent_gp_6(dhveg-6)_None3008	0	0	0	0	1	0	0	0	0	0	0	0	1	0
Arc;_Euryarchaeota;_Halobacteria;_Halobacteriales;_Deep_sea_hydrothermal_vent_gp_6(dhveg-6)_None3009	1	0	2	3	2	2	0	4	8	0	0	0	4	3
Arc;_Euryarchaeota;_Halobacteria;_Halobacteriales;_Deep_sea_hydrothermal_vent_gp_6(dhveg-6)_None301	0	1	0	0	0	0	0	0	4	0	0	0	3	0
Arc;_Euryarchaeota;_Halobacteria;_Halobacteriales;_Deep_sea_hydrothermal_vent_gp_6(dhveg-6)_None3010	5	0	0	0	1	20	2	2	0	0	0	0	0	0
Arc;_Euryarchaeota;_Halobacteria;_Halobacteriales;_Deep_sea_hydrothermal_vent_gp_6(dhveg-6)_None3012	0	1	0	0	1	0	0	0	0	0	0	0	0	0
Arc;_Euryarchaeota;_Halobacteria;_Halobacteriales;_Deep_sea_hydrothermal_vent_gp_6(dhveg-6)_None3014	0	0	0	0	0	0	0	10	29	0	0	0	5	0
Arc;_Euryarchaeota;_Halobacteria;_Halobacteriales;_Deep_sea_hydrothermal_vent_gp_6(dhveg-6)_None3015	0	0	0	0	0	3	0	0	1	0	0	0	3	0
Arc;_Euryarchaeota;_Halobacteria;_Halobacteriales;_Deep_sea_hydrothermal_vent_gp_6(dhveg-6)_None3016	5	0	0	0	0	0	0	0	0	0	0	0	0	0
Arc;_Euryarchaeota;_Halobacteria;_Halobacteriales;_Deep_sea_hydrothermal_vent_gp_6(dhveg-6)_None3017	0	3	0	0	0	0	0	0	0	0	0	0	0	0
Arc;_Euryarchaeota;_Halobacteria;_Halobacteriales;_Deep_sea_hydrothermal_vent_gp_6(dhveg-6)_None3018	0	0	0	0	0	0	0	0	0	0	0	0	1	0
Arc;_Euryarchaeota;_Halobacteria;_Halobacteriales;_Deep_sea_hydrothermal_vent_gp_6(dhveg-6)_None3019	0	0	0	0	0	0	0	0	2	0	0	0	0	0
Arc;_Euryarchaeota;_Halobacteria;_Halobacteriales;_Deep_sea_hydrothermal_vent_gp_6(dhveg-6)_None3021	0	0	0	0	0	0	0	0	0	0	0	0	1	0
Arc;_Euryarchaeota;_Halobacteria;_Halobacteriales;_Deep_sea_hydrothermal_vent_gp_6(dhveg-6)_None3022	0	0	0	0	0	0	0	1	5	0	1	0	25	0
Arc;_Euryarchaeota;_Halobacteria;_Halobacteriales;_Deep_sea_hydrothermal_vent_gp_6(dhveg-6)_None3027	0	0	0	0	0	6	8	0	0	0	0	0	0	0
Arc;_Euryarchaeota;_Halobacteria;_Halobacteriales;_Deep_sea_hydrothermal_vent_gp_6(dhveg-6)_None3029	0	3	1	1	0	3	1	8	2	0	2	2	0	0
Arc;_Euryarchaeota;_Halobacteria;_Halobacteriales;_Deep_sea_hydrothermal_vent_gp_6(dhveg-6)_None3030	0	0	0	0	0	0	0	0	0	0	0	0	1	0
Arc;_Euryarchaeota;_Halobacteria;_Halobacteriales;_Deep_sea_hydrothermal_vent_gp_6(dhveg-6)_None3031	6	0	0	0	0	0	0	0	0	0	0	0	0	0
Arc;_Euryarchaeota;_Halobacteria;_Halobacteriales;_Deep_sea_hydrothermal_vent_gp_6(dhveg-6)_None3032	0	0	0	0	0	0	1	0	0	0	0	0	0	0
Arc;_Euryarchaeota;_Halobacteria;_Halobacteriales;_Deep_sea_hydrothermal_vent_gp_6(dhveg-6)_None3033	0	1	0	1	0	2	3	2	0	0	0	0	0	0
Arc;_Euryarchaeota;_Halobacteria;_Halobacteriales;_Deep_sea_hydrothermal_vent_gp_6(dhveg-6)_None3034	0	0	0	0	0	0	0	0	1	0	0	0	0	0
Arc;_Euryarchaeota;_Halobacteria;_Halobacteriales;_Deep_sea_hydrothermal_vent_gp_6(dhveg-6)_None3036	0	0	0	0	0	0	0	1	0	0	0	0	0	0
Arc;_Euryarchaeota;_Halobacteria;_Halobacteriales;_Deep_sea_hydrothermal_vent_gp_6(dhveg-6)_None3037	0	0	0	0	0	0	0	0	0	0	0	0	2	0
Arc;_Euryarchaeota;_Halobacteria;_Halobacteriales;_Deep_sea_hydrothermal_vent_gp_6(dhveg-6)_None304	0	1	0	0	13	0	6	19	18	3	24	16	5	0
Arc;_Euryarchaeota;_Halobacteria;_Halobacteriales;_Deep_sea_hydrothermal_vent_gp_6(dhveg-6)_None3040	0	0	0	0	0	0	0	1	0	0	0	0	0	0
Arc;_Euryarchaeota;_Halobacteria;_Halobacteriales;_Deep_sea_hydrothermal_vent_gp_6(dhveg-6)_None3041	0	0	0	0	0	0	0	8	0	0	0	0	0	0
Arc;_Euryarchaeota;_Halobacteria;_Halobacteriales;_Deep_sea_hydrothermal_vent_gp_6(dhveg-6)_None3046	0	0	0	0	0	0	0	0	1	0	0	0	0	0
Arc;_Euryarchaeota;_Halobacteria;_Halobacteriales;_Deep_sea_hydrothermal_vent_gp_6(dhveg-6)_None3049	0	0	0	0	0	0	0	0	1	0	0	0	0	0
Arc;_Euryarchaeota;_Halobacteria;_Halobacteriales;_Deep_sea_hydrothermal_vent_gp_6(dhveg-6)_None3050	0	0	0	0	0	0	3	15	6	6	0	0	2	0
Arc;_Euryarchaeota;_Halobacteria;_Halobacteriales;_Deep_sea_hydrothermal_vent_gp_6(dhveg-6)_None3051	0	0	0	0	2	0	0	0	6	0	0	0	0	0
Arc;_Euryarchaeota;_Halobacteria;_Halobacteriales;_Deep_sea_hydrothermal_vent_gp_6(dhveg-6)_None3054	0	4	0	0	14	0	0	0	0	0	0	0	0	0
Arc;_Euryarchaeota;_Halobacteria;_Halobacteriales;_Deep_sea_hydrothermal_vent_gp_6(dhveg-6)_None3055	0	0	1	0	0	0	0	0	0	0	0	0	0	0
Arc;_Euryarchaeota;_Halobacteria;_Halobacteriales;_Deep_sea_hydrothermal_vent_gp_6(dhveg-6)_None3057	0	0	0	0	0	1	0	0	0	0	0	0	0	0
Arc;_Euryarchaeota;_Halobacteria;_Halobacteriales;_Deep_sea_hydrothermal_vent_gp_6(dhveg-6)_None3058	0	0	0	0	0	0	0	3	2	0	0	0	0	0
Arc;_Euryarchaeota;_Halobacteria;_Halobacteriales;_Deep_sea_hydrothermal_vent_gp_6(dhveg-6)_None306	0	0	0	0	2	0	0	0	0	0	0	0	0	0
Arc;_Euryarchaeota;_Halobacteria;_Halobacteriales;_Deep_sea_hydrothermal_vent_gp_6(dhveg-6)_None3060	0	0	0	0	0	0	0	18	0	3	1	0	0	0
Arc;_Euryarchaeota;_Halobacteria;_Halobacteriales;_Deep_sea_hydrothermal_vent_gp_6(dhveg-6)_None3061	0	0	0	0	0	0	0	1	0	0	0	0	0	0
Arc;_Euryarchaeota;_Halobacteria;_Halobacteriales;_Deep_sea_hydrothermal_vent_gp_6(dhveg-6)_None3062	5	0	0	0	0	3	0	0	0	4	4	0	2	0
Arc;_Euryarchaeota;_Halobacteria;_Halobacteriales;_Deep_sea_hydrothermal_vent_gp_6(dhveg-6)_None3063	0	0	0	0	0	0	0	4	0	0	0	0	0	0
Arc;_Euryarchaeota;_Halobacteria;_Halobacteriales;_Deep_sea_hydrothermal_vent_gp_6(dhveg-6)_None3064	0	1	5	0	0	1	5	5	2	0	0	0	0	0
Arc;_Euryarchaeota;_Halobacteria;_Halobacteriales;_Deep_sea_hydrothermal_vent_gp_6(dhveg-6)_None3066	0	0	0	0	0	0	0	0	4	0	0	0	0	0
Arc;_Euryarchaeota;_Halobacteria;_Halobacteriales;_Deep_sea_hydrothermal_vent_gp_6(dhveg-6)_None3067	0	0	0	0	0	45	0	0	0	0	0	0	0	0
Arc;_Euryarchaeota;_Halobacteria;_Halobacteriales;_Deep_sea_hydrothermal_vent_gp_6(dhveg-6)_None3068	0	0	0	0	0	7	0	2	0	0	0	0	0	0
Arc;_Euryarchaeota;_Halobacteria;_Halobacteriales;_Deep_sea_hydrothermal_vent_gp_6(dhveg-6)_None3069	0	0	0	0	0	9	0	1	6	0	0	0	0	0
Arc;_Euryarchaeota;_Halobacteria;_Halobacteriales;_Deep_sea_hydrothermal_vent_gp_6(dhveg-6)_None307	0	0	0	0	0	0	0	0	4	0	0	0	4	0
Arc;_Euryarchaeota;_Halobacteria;_Halobacteriales;_Deep_sea_hydrothermal_vent_gp_6(dhveg-6)_None3070	0	0	0	1	0	0	3	0	3	0	2	23	6	0
Arc;_Euryarchaeota;_Halobacteria;_Halobacteriales;_Deep_sea_hydrothermal_vent_gp_6(dhveg-6)_None3072	0	0	0	0	0	0	0	0	0	0	0	0	1	0
Arc;_Euryarchaeota;_Halobacteria;_Halobacteriales;_Deep_sea_hydrothermal_vent_gp_6(dhveg-6)_None3075	0	0	0	0	3	0	0	0	13	0	0	0	4	0
Arc;_Euryarchaeota;_Halobacteria;_Halobacteriales;_Deep_sea_hydrothermal_vent_gp_6(dhveg-6)_None3076	0	0	0	0	0	0	0	0	0	1	0	0	0	0
Arc;_Euryarchaeota;_Halobacteria;_Halobacteriales;_Deep_sea_hydrothermal_vent_gp_6(dhveg-6)_None3077	1	0	0	0	0	0	0	0	0	0	0	0	0	0
Arc;_Euryarchaeota;_Halobacteria;_Halobacteriales;_Deep_sea_hydrothermal_vent_gp_6(dhveg-6)_None308	0	0	1	0	0	0	0	0	0	0	0	0	0	0
Arc;_Euryarchaeota;_Halobacteria;_Halobacteriales;_Deep_sea_hydrothermal_vent_gp_6(dhveg-6)_None3080	0	1	0	0	0	2	0	0	0	0	0	0	0	0
Arc;_Euryarchaeota;_Halobacteria;_Halobacteriales;_Deep_sea_hydrothermal_vent_gp_6(dhveg-6)_None3082	0	0	0	0	0	0	0	3	0	0	0	0	0	0
Arc;_Euryarchaeota;_Halobacteria;_Halobacteriales;_Deep_sea_hydrothermal_vent_gp_6(dhveg-6)_None3085	2	0	0	0	0	0	0	0	0	0	0	0	0	0
Arc;_Euryarchaeota;_Halobacteria;_Halobacteriales;_Deep_sea_hydrothermal_vent_gp_6(dhveg-6)_None3086	0	0	0	0	1	0	0	0	0	0	0	3	0	0
Arc;_Euryarchaeota;_Halobacteria;_Halobacteriales;_Deep_sea_hydrothermal_vent_gp_6(dhveg-6)_None3087	6	0	9	1	9	4	80	50	18	12	21	0	10	3
Arc;_Euryarchaeota;_Halobacteria;_Halobacteriales;_Deep_sea_hydrothermal_vent_gp_6(dhveg-6)_None3089	0	0	0	0	0	0	0	0	0	0	0	0	1	0
Arc;_Euryarchaeota;_Halobacteria;_Halobacteriales;_Deep_sea_hydrothermal_vent_gp_6(dhveg-6)_None309	1	0	0	0	0	0	0	0	0	0	0	0	0	0
Arc;_Euryarchaeota;_Halobacteria;_Halobacteriales;_Deep_sea_hydrothermal_vent_gp_6(dhveg-6)_None3091	5	0	0	0	1	0	0	0	0	0	0	0	0	0
Arc;_Euryarchaeota;_Halobacteria;_Halobacteriales;_Deep_sea_hydrothermal_vent_gp_6(dhveg-6)_None3094	0	0	0	0	1	0	0	0	0	0	0	0	0	0
Arc;_Euryarchaeota;_Halobacteria;_Halobacteriales;_Deep_sea_hydrothermal_vent_gp_6(dhveg-6)_None3096	0	0	1	1	0	6	2	6	0	0	0	0	0	0
Arc;_Euryarchaeota;_Halobacteria;_Halobacteriales;_Deep_sea_hydrothermal_vent_gp_6(dhveg-6)_None3098	0	0	0	0	0	0	0	0	0	0	0	0	5	0
Arc;_Euryarchaeota;_Halobacteria;_Halobacteriales;_Deep_sea_hydrothermal_vent_gp_6(dhveg-6)_None31	0	1	0	2	1	4	23	3	11	0	0	0	1	0
Arc;_Euryarchaeota;_Halobacteria;_Halobacteriales;_Deep_sea_hydrothermal_vent_gp_6(dhveg-6)_None310	0	0	0	0	0	0	2	0	0	0	0	0	0	0
Arc;_Euryarchaeota;_Halobacteria;_Halobacteriales;_Deep_sea_hydrothermal_vent_gp_6(dhveg-6)_None3100	0	0	0	0	0	0	0	0	0	0	0	0	3	0
Arc;_Euryarchaeota;_Halobacteria;_Halobacteriales;_Deep_sea_hydrothermal_vent_gp_6(dhveg-6)_None3104	0	0	0	0	0	0	0	0	1	0	0	0	0	0
Arc;_Euryarchaeota;_Halobacteria;_Halobacteriales;_Deep_sea_hydrothermal_vent_gp_6(dhveg-6)_None3105	2	0	0	0	0	0	0	0	0	0	0	0	0	0
Arc;_Euryarchaeota;_Halobacteria;_Halobacteriales;_Deep_sea_hydrothermal_vent_gp_6(dhveg-6)_None3106	0	0	0	0	0	3	0	1	0	0	0	0	0	0
Arc;_Euryarchaeota;_Halobacteria;_Halobacteriales;_Deep_sea_hydrothermal_vent_gp_6(dhveg-6)_None3107	0	0	0	0	0	0	0	0	0	2	0	0	0	0
Arc;_Euryarchaeota;_Halobacteria;_Halobacteriales;_Deep_sea_hydrothermal_vent_gp_6(dhveg-6)_None311	0	0	0	0	0	0	0	3	0	0	0	0	0	0
Arc;_Euryarchaeota;_Halobacteria;_Halobacteriales;_Deep_sea_hydrothermal_vent_gp_6(dhveg-6)_None3110	0	0	7	0	0	0	3	1	0	0	0	0	0	0
Arc;_Euryarchaeota;_Halobacteria;_Halobacteriales;_Deep_sea_hydrothermal_vent_gp_6(dhveg-6)_None3111	0	1	0	0	3	0	0	1	2	0	0	0	0	0
Arc;_Euryarchaeota;_Halobacteria;_Halobacteriales;_Deep_sea_hydrothermal_vent_gp_6(dhveg-6)_None3112	0	0	0	0	0	0	0	0	0	0	0	0	1	0
Arc;_Euryarchaeota;_Halobacteria;_Halobacteriales;_Deep_sea_hydrothermal_vent_gp_6(dhveg-6)_None3113	0	0	0	0	0	0	0	0	0	0	0	0	1	0
Arc;_Euryarchaeota;_Halobacteria;_Halobacteriales;_Deep_sea_hydrothermal_vent_gp_6(dhveg-6)_None3114	0	3	0	0	0	0	0	0	0	0	0	0	0	0
Arc;_Euryarchaeota;_Halobacteria;_Halobacteriales;_Deep_sea_hydrothermal_vent_gp_6(dhveg-6)_None3115	0	2	0	0	9	55	9	19	3	0	0	0	11	0
Arc;_Euryarchaeota;_Halobacteria;_Halobacteriales;_Deep_sea_hydrothermal_vent_gp_6(dhveg-6)_None3116	0	0	0	0	2	1	0	1	1	0	0	0	0	0
Arc;_Euryarchaeota;_Halobacteria;_Halobacteriales;_Deep_sea_hydrothermal_vent_gp_6(dhveg-6)_None3117	0	0	0	0	2	0	0	0	0	0	0	0	0	0
Arc;_Euryarchaeota;_Halobacteria;_Halobacteriales;_Deep_sea_hydrothermal_vent_gp_6(dhveg-6)_None3118	0	0	0	0	1	0	0	0	0	0	0	0	0	0
Arc;_Euryarchaeota;_Halobacteria;_Halobacteriales;_Deep_sea_hydrothermal_vent_gp_6(dhveg-6)_None312	0	0	0	0	0	0	0	0	0	0	0	0	1	0
Arc;_Euryarchaeota;_Halobacteria;_Halobacteriales;_Deep_sea_hydrothermal_vent_gp_6(dhveg-6)_None3120	0	0	0	0	0	0	0	0	1	0	0	1	0	0
Arc;_Euryarchaeota;_Halobacteria;_Halobacteriales;_Deep_sea_hydrothermal_vent_gp_6(dhveg-6)_None3121	0	2	0	0	1	0	0	0	0	0	1	0	0	0
Arc;_Euryarchaeota;_Halobacteria;_Halobacteriales;_Deep_sea_hydrothermal_vent_gp_6(dhveg-6)_None3123	0	1	0	1	0	0	0	0	0	0	0	0	0	0
Arc;_Euryarchaeota;_Halobacteria;_Halobacteriales;_Deep_sea_hydrothermal_vent_gp_6(dhveg-6)_None3125	0	1	0	0	1	0	0	0	1	0	0	0	0	0
Arc;_Euryarchaeota;_Halobacteria;_Halobacteriales;_Deep_sea_hydrothermal_vent_gp_6(dhveg-6)_None3126	0	0	0	0	0	0	0	2	3	0	2	0	0	0
Arc;_Euryarchaeota;_Halobacteria;_Halobacteriales;_Deep_sea_hydrothermal_vent_gp_6(dhveg-6)_None3128	0	0	0	0	0	0	0	0	0	0	0	0	1	0
Arc;_Euryarchaeota;_Halobacteria;_Halobacteriales;_Deep_sea_hydrothermal_vent_gp_6(dhveg-6)_None3129	0	1	0	0	0	0	0	0	0	0	0	0	0	0
Arc;_Euryarchaeota;_Halobacteria;_Halobacteriales;_Deep_sea_hydrothermal_vent_gp_6(dhveg-6)_None313	1	0	0	0	0	0	0	0	0	0	0	0	0	0
Arc;_Euryarchaeota;_Halobacteria;_Halobacteriales;_Deep_sea_hydrothermal_vent_gp_6(dhveg-6)_None3130	0	0	0	0	0	0	0	1	0	0	0	0	0	0
Arc;_Euryarchaeota;_Halobacteria;_Halobacteriales;_Deep_sea_hydrothermal_vent_gp_6(dhveg-6)_None3131	0	0	0	0	0	1	0	0	0	0	0	0	0	0
Arc;_Euryarchaeota;_Halobacteria;_Halobacteriales;_Deep_sea_hydrothermal_vent_gp_6(dhveg-6)_None3133	0	0	0	0	0	1	1	1	1	0	0	0	1	0
Arc;_Euryarchaeota;_Halobacteria;_Halobacteriales;_Deep_sea_hydrothermal_vent_gp_6(dhveg-6)_None3134	0	0	1	0	0	0	0	0	0	0	0	0	0	0
Arc;_Euryarchaeota;_Halobacteria;_Halobacteriales;_Deep_sea_hydrothermal_vent_gp_6(dhveg-6)_None3137	0	2	0	0	0	0	0	0	0	0	0	0	0	0
Arc;_Euryarchaeota;_Halobacteria;_Halobacteriales;_Deep_sea_hydrothermal_vent_gp_6(dhveg-6)_None3138	0	0	0	0	0	0	0	0	1	0	0	0	0	0
Arc;_Euryarchaeota;_Halobacteria;_Halobacteriales;_Deep_sea_hydrothermal_vent_gp_6(dhveg-6)_None3139	0	2	0	0	0	0	0	0	0	0	0	0	0	0
Arc;_Euryarchaeota;_Halobacteria;_Halobacteriales;_Deep_sea_hydrothermal_vent_gp_6(dhveg-6)_None314	0	0	0	0	1	3	0	3	3	0	0	0	0	0
Arc;_Euryarchaeota;_Halobacteria;_Halobacteriales;_Deep_sea_hydrothermal_vent_gp_6(dhveg-6)_None3142	0	0	0	0	0	0	0	1	0	0	0	0	0	0
Arc;_Euryarchaeota;_Halobacteria;_Halobacteriales;_Deep_sea_hydrothermal_vent_gp_6(dhveg-6)_None3143	0	0	2	0	0	1	0	20	1	1	0	0	0	0
Arc;_Euryarchaeota;_Halobacteria;_Halobacteriales;_Deep_sea_hydrothermal_vent_gp_6(dhveg-6)_None3144	0	0	0	0	0	0	0	0	1	0	0	0	0	0
Arc;_Euryarchaeota;_Halobacteria;_Halobacteriales;_Deep_sea_hydrothermal_vent_gp_6(dhveg-6)_None315	0	7	0	1	2	0	0	0	0	0	0	0	0	0
Arc;_Euryarchaeota;_Halobacteria;_Halobacteriales;_Deep_sea_hydrothermal_vent_gp_6(dhveg-6)_None3155	0	0	1	0	3	2	0	0	0	0	0	0	0	0
Arc;_Euryarchaeota;_Halobacteria;_Halobacteriales;_Deep_sea_hydrothermal_vent_gp_6(dhveg-6)_None3157	0	0	0	0	0	0	0	0	3	1	17	49	4	0
Arc;_Euryarchaeota;_Halobacteria;_Halobacteriales;_Deep_sea_hydrothermal_vent_gp_6(dhveg-6)_None316	0	0	0	0	0	0	0	0	0	1	0	0	0	0
Arc;_Euryarchaeota;_Halobacteria;_Halobacteriales;_Deep_sea_hydrothermal_vent_gp_6(dhveg-6)_None3160	0	0	0	0	0	0	0	0	0	0	0	0	4	0
Arc;_Euryarchaeota;_Halobacteria;_Halobacteriales;_Deep_sea_hydrothermal_vent_gp_6(dhveg-6)_None3161	0	0	0	0	0	0	0	1	0	0	0	0	0	0
Arc;_Euryarchaeota;_Halobacteria;_Halobacteriales;_Deep_sea_hydrothermal_vent_gp_6(dhveg-6)_None3163	0	0	0	0	0	7	0	0	0	3	0	0	1	0
Arc;_Euryarchaeota;_Halobacteria;_Halobacteriales;_Deep_sea_hydrothermal_vent_gp_6(dhveg-6)_None3165	0	0	0	1	0	0	0	0	0	0	0	0	1	0
Arc;_Euryarchaeota;_Halobacteria;_Halobacteriales;_Deep_sea_hydrothermal_vent_gp_6(dhveg-6)_None3166	0	0	0	0	0	0	0	0	0	0	0	0	1	0
Arc;_Euryarchaeota;_Halobacteria;_Halobacteriales;_Deep_sea_hydrothermal_vent_gp_6(dhveg-6)_None3167	0	0	0	0	0	0	0	1	0	0	0	0	0	0
Arc;_Euryarchaeota;_Halobacteria;_Halobacteriales;_Deep_sea_hydrothermal_vent_gp_6(dhveg-6)_None3168	2	0	0	0	0	0	0	0	0	0	0	0	2	0
Arc;_Euryarchaeota;_Halobacteria;_Halobacteriales;_Deep_sea_hydrothermal_vent_gp_6(dhveg-6)_None317	0	0	0	0	0	1	0	0	0	0	0	0	0	0
Arc;_Euryarchaeota;_Halobacteria;_Halobacteriales;_Deep_sea_hydrothermal_vent_gp_6(dhveg-6)_None3171	0	0	0	0	0	0	3	0	0	0	0	0	0	0
Arc;_Euryarchaeota;_Halobacteria;_Halobacteriales;_Deep_sea_hydrothermal_vent_gp_6(dhveg-6)_None3174	1	0	0	0	0	0	0	0	1	1	2	0	0	0
Arc;_Euryarchaeota;_Halobacteria;_Halobacteriales;_Deep_sea_hydrothermal_vent_gp_6(dhveg-6)_None3176	0	0	0	0	0	0	0	0	0	0	0	0	2	0
Arc;_Euryarchaeota;_Halobacteria;_Halobacteriales;_Deep_sea_hydrothermal_vent_gp_6(dhveg-6)_None3177	0	9	0	0	0	0	0	1	13	0	0	4	7	0
Arc;_Euryarchaeota;_Halobacteria;_Halobacteriales;_Deep_sea_hydrothermal_vent_gp_6(dhveg-6)_None3179	0	0	0	0	0	2	0	0	2	0	0	0	2	0
Arc;_Euryarchaeota;_Halobacteria;_Halobacteriales;_Deep_sea_hydrothermal_vent_gp_6(dhveg-6)_None318	0	0	0	0	0	0	0	0	1	0	1	0	0	0
Arc;_Euryarchaeota;_Halobacteria;_Halobacteriales;_Deep_sea_hydrothermal_vent_gp_6(dhveg-6)_None3180	0	0	0	0	1	3	0	0	0	4	0	0	0	1
Arc;_Euryarchaeota;_Halobacteria;_Halobacteriales;_Deep_sea_hydrothermal_vent_gp_6(dhveg-6)_None3182	0	0	0	0	0	0	0	0	0	0	0	0	1	0
Arc;_Euryarchaeota;_Halobacteria;_Halobacteriales;_Deep_sea_hydrothermal_vent_gp_6(dhveg-6)_None3183	0	0	0	0	0	0	0	0	0	0	0	0	1	0
Arc;_Euryarchaeota;_Halobacteria;_Halobacteriales;_Deep_sea_hydrothermal_vent_gp_6(dhveg-6)_None3188	0	0	0	1	0	0	0	0	0	0	0	0	0	0
Arc;_Euryarchaeota;_Halobacteria;_Halobacteriales;_Deep_sea_hydrothermal_vent_gp_6(dhveg-6)_None3189	0	0	0	0	1	0	0	0	0	0	0	0	0	0
Arc;_Euryarchaeota;_Halobacteria;_Halobacteriales;_Deep_sea_hydrothermal_vent_gp_6(dhveg-6)_None319	9	0	0	0	0	4	0	0	0	0	0	0	2	0
Arc;_Euryarchaeota;_Halobacteria;_Halobacteriales;_Deep_sea_hydrothermal_vent_gp_6(dhveg-6)_None3194	0	0	0	0	0	0	0	0	0	0	1	0	0	0
Arc;_Euryarchaeota;_Halobacteria;_Halobacteriales;_Deep_sea_hydrothermal_vent_gp_6(dhveg-6)_None3195	0	0	0	0	2	0	0	0	0	0	0	0	0	0
Arc;_Euryarchaeota;_Halobacteria;_Halobacteriales;_Deep_sea_hydrothermal_vent_gp_6(dhveg-6)_None3196	0	0	1	0	0	1	0	0	1	0	0	0	4	0
Arc;_Euryarchaeota;_Halobacteria;_Halobacteriales;_Deep_sea_hydrothermal_vent_gp_6(dhveg-6)_None3197	0	0	0	0	0	1	0	1	0	0	0	0	0	0
Arc;_Euryarchaeota;_Halobacteria;_Halobacteriales;_Deep_sea_hydrothermal_vent_gp_6(dhveg-6)_None3198	0	0	0	0	0	5	0	0	1	1	0	0	0	0
Arc;_Euryarchaeota;_Halobacteria;_Halobacteriales;_Deep_sea_hydrothermal_vent_gp_6(dhveg-6)_None3199	0	4	9	2	2	0	0	0	13	0	3	29	4	0
Arc;_Euryarchaeota;_Halobacteria;_Halobacteriales;_Deep_sea_hydrothermal_vent_gp_6(dhveg-6)_None32	0	0	0	0	0	0	0	3	0	0	0	0	0	0
Arc;_Euryarchaeota;_Halobacteria;_Halobacteriales;_Deep_sea_hydrothermal_vent_gp_6(dhveg-6)_None320	2	7	0	1	4	0	0	0	0	0	0	0	1	0
Arc;_Euryarchaeota;_Halobacteria;_Halobacteriales;_Deep_sea_hydrothermal_vent_gp_6(dhveg-6)_None3202	0	3	0	0	0	0	0	0	0	0	0	0	0	0
Arc;_Euryarchaeota;_Halobacteria;_Halobacteriales;_Deep_sea_hydrothermal_vent_gp_6(dhveg-6)_None3205	0	0	0	0	0	0	0	0	0	0	0	0	1	0
Arc;_Euryarchaeota;_Halobacteria;_Halobacteriales;_Deep_sea_hydrothermal_vent_gp_6(dhveg-6)_None321	0	0	0	0	0	0	0	0	0	0	0	0	2	0
Arc;_Euryarchaeota;_Halobacteria;_Halobacteriales;_Deep_sea_hydrothermal_vent_gp_6(dhveg-6)_None3210	0	0	0	0	0	0	0	1	1	0	0	0	0	0
Arc;_Euryarchaeota;_Halobacteria;_Halobacteriales;_Deep_sea_hydrothermal_vent_gp_6(dhveg-6)_None3213	0	0	0	0	0	0	1	0	0	0	0	0	0	0
Arc;_Euryarchaeota;_Halobacteria;_Halobacteriales;_Deep_sea_hydrothermal_vent_gp_6(dhveg-6)_None3214	0	0	0	0	0	0	0	1	3	11	0	0	2	0
Arc;_Euryarchaeota;_Halobacteria;_Halobacteriales;_Deep_sea_hydrothermal_vent_gp_6(dhveg-6)_None3216	0	0	0	0	0	0	4	0	0	0	0	0	0	0
Arc;_Euryarchaeota;_Halobacteria;_Halobacteriales;_Deep_sea_hydrothermal_vent_gp_6(dhveg-6)_None3218	0	0	0	0	0	0	0	0	3	0	0	0	0	0
Arc;_Euryarchaeota;_Halobacteria;_Halobacteriales;_Deep_sea_hydrothermal_vent_gp_6(dhveg-6)_None3220	0	3	0	0	9	19	0	0	0	0	0	0	2	0
Arc;_Euryarchaeota;_Halobacteria;_Halobacteriales;_Deep_sea_hydrothermal_vent_gp_6(dhveg-6)_None3224	0	0	0	0	0	0	0	0	0	0	0	0	1	0
Arc;_Euryarchaeota;_Halobacteria;_Halobacteriales;_Deep_sea_hydrothermal_vent_gp_6(dhveg-6)_None3228	0	0	0	0	0	3	0	0	0	0	0	0	2	0
Arc;_Euryarchaeota;_Halobacteria;_Halobacteriales;_Deep_sea_hydrothermal_vent_gp_6(dhveg-6)_None3229	0	0	2	0	1	2	4	1	1	4	0	0	0	0
Arc;_Euryarchaeota;_Halobacteria;_Halobacteriales;_Deep_sea_hydrothermal_vent_gp_6(dhveg-6)_None3230	0	0	3	1	8	1	0	6	5	2	0	0	1	0
Arc;_Euryarchaeota;_Halobacteria;_Halobacteriales;_Deep_sea_hydrothermal_vent_gp_6(dhveg-6)_None3231	0	0	0	0	0	0	0	0	0	0	0	0	3	0
Arc;_Euryarchaeota;_Halobacteria;_Halobacteriales;_Deep_sea_hydrothermal_vent_gp_6(dhveg-6)_None3233	0	1	0	0	0	0	0	0	0	0	0	0	0	3
Arc;_Euryarchaeota;_Halobacteria;_Halobacteriales;_Deep_sea_hydrothermal_vent_gp_6(dhveg-6)_None3236	0	0	0	0	0	0	0	0	0	0	0	0	1	0
Arc;_Euryarchaeota;_Halobacteria;_Halobacteriales;_Deep_sea_hydrothermal_vent_gp_6(dhveg-6)_None3237	0	0	0	0	0	2	0	0	0	0	0	0	0	0
Arc;_Euryarchaeota;_Halobacteria;_Halobacteriales;_Deep_sea_hydrothermal_vent_gp_6(dhveg-6)_None3238	0	0	0	0	0	0	0	1	0	0	0	0	0	0
Arc;_Euryarchaeota;_Halobacteria;_Halobacteriales;_Deep_sea_hydrothermal_vent_gp_6(dhveg-6)_None3240	0	0	0	0	0	1	0	0	0	0	0	0	0	0
Arc;_Euryarchaeota;_Halobacteria;_Halobacteriales;_Deep_sea_hydrothermal_vent_gp_6(dhveg-6)_None3241	0	0	0	0	1	0	0	0	0	0	0	0	0	0
Arc;_Euryarchaeota;_Halobacteria;_Halobacteriales;_Deep_sea_hydrothermal_vent_gp_6(dhveg-6)_None3242	0	0	0	0	0	5	6	2	5	0	0	0	1	0
Arc;_Euryarchaeota;_Halobacteria;_Halobacteriales;_Deep_sea_hydrothermal_vent_gp_6(dhveg-6)_None3243	0	0	0	0	2	0	0	0	0	0	0	0	0	0
Arc;_Euryarchaeota;_Halobacteria;_Halobacteriales;_Deep_sea_hydrothermal_vent_gp_6(dhveg-6)_None3244	0	0	0	0	0	0	0	0	1	0	0	0	0	0
Arc;_Euryarchaeota;_Halobacteria;_Halobacteriales;_Deep_sea_hydrothermal_vent_gp_6(dhveg-6)_None3248	0	1	5	3	3	15	0	4	18	4	2	0	10	0
[truncated: 3,689 more rows]
