# Supplementary material for: Biogeochemical Typing of Paddy Field by a Data-Driven Approach Revealing Sub-Systems within a Complex Environment - A Pipeline to Filtrate, Organize and Frame Massive Dataset from Multi-Omics Analyses
Source: PLoS One. 2014 Oct 20;9(10):e110723. doi: 10.1371/journal.pone.0110723 (PMC4203823; doi:10.1371/journal.pone.0110723)
Supplement: Table S3 — 18S OTUs in number of reads along sampling points. Rows: OTUs. Columns: sampling points. (XLSX) [file pone.0110723.s026.xlsx]

## Sheet: Sheet1
	ara1	p1f1	p1f2	p1f3	p1s	p2f1	p2f2	p2f3	p2s	p3f1	p3f2	p3f3	p3s	ara2
Root; k__Archaea; p__Crenarchaeota; c__Soil_crenarchaeotic_group(scg); o__Uncultured_archaeon; f__Uncultured_archaeon_6496	0	0	0	0	0	0	0	0	1	0	0	0	0	0
Root; k__Archaea; p__Crenarchaeota; c__Soil_crenarchaeotic_group(scg); o__Uncultured_archaeon; f__Uncultured_archaeon_67542	0	0	0	0	0	0	0	0	2	0	0	0	0	0
Root; k__Archaea; p__Crenarchaeota; c__South_african_gold_mine_gp_1(sagmcg-1); o__Uncultured_archaeon_sagma-x; f__Uncultured_archaeon_sagma-x_80795	0	0	0	0	1	0	0	0	0	0	0	0	0	0
Root; k__Eukaryota; p__Alveolata; c__Apicomplexa; o__Coccidia; f__Eucoccidiorida_33551	1	0	0	0	0	0	0	1	0	0	0	0	0	0
Root; k__Eukaryota; p__Alveolata; c__Apicomplexa; o__Coccidia; f__Eucoccidiorida_37238	0	0	0	0	0	0	0	0	0	0	0	0	0	1
Root; k__Eukaryota; p__Alveolata; c__Apicomplexa; o__Coccidia; f__Eucoccidiorida_55905	2	0	0	0	0	0	0	0	0	0	0	0	0	2
Root; k__Eukaryota; p__Alveolata; c__Apicomplexa; o__Coccidia; f__Eucoccidiorida_69463	0	0	0	0	0	0	0	0	2	0	0	0	0	11
Root; k__Eukaryota; p__Alveolata; c__Apicomplexa; o__Coccidia; f__Eucoccidiorida_92987	12	0	0	0	0	0	0	0	0	0	0	0	0	0
Root; k__Eukaryota; p__Alveolata; c__Apicomplexa; o__Coccidia; f__Eucoccidiorida_None1595	0	0	0	0	0	0	0	0	0	0	0	0	0	9
Root; k__Eukaryota; p__Alveolata; c__Apicomplexa; o__Coccidia; f__Eucoccidiorida_None2874	0	0	0	0	1	0	0	0	0	0	0	0	0	0
Root; k__Eukaryota; p__Alveolata; c__Apicomplexa; o__Coccidia; f__Eucoccidiorida_None444	0	0	0	0	0	0	0	0	0	0	0	0	0	7
Root; k__Eukaryota; p__Alveolata; c__Apicomplexa; o__Coccidia; f__Eucoccidiorida_None5141	0	0	0	0	0	0	0	0	0	0	0	0	0	3
Root; k__Eukaryota; p__Alveolata; c__Apicomplexa; o__Colpodellidae; f__Colpodella_89038	0	2	0	8	1	0	4	1	3	5	3	10	3	14
Root; k__Eukaryota; p__Alveolata; c__Apicomplexa; o__Colpodellidae; f__Colpodella_None10649	0	0	0	0	0	0	0	0	0	0	0	1	0	0
Root; k__Eukaryota; p__Alveolata; c__Apicomplexa; o__Colpodellidae; f__Colpodella_None1847	1	0	0	0	0	0	0	1	0	1	3	20	0	2
Root; k__Eukaryota; p__Alveolata; c__Apicomplexa; o__Colpodellidae; f__Colpodella_None2332	0	0	0	0	1	0	0	0	0	0	0	2	1	0
Root; k__Eukaryota; p__Alveolata; c__Apicomplexa; o__Colpodellidae; f__Colpodella_None4510	1	0	0	0	0	0	0	0	0	0	0	0	0	0
Root; k__Eukaryota; p__Alveolata; c__Apicomplexa; o__Colpodellidae; f__Colpodella_None6505	0	0	0	0	0	0	0	0	0	0	1	0	0	0
Root; k__Eukaryota; p__Alveolata; c__Apicomplexa; o__Colpodellidae; f__Colpodella_None8523	0	0	0	0	0	0	0	0	0	0	1	0	0	0
Root; k__Eukaryota; p__Alveolata; c__Apicomplexa; o__Colpodellidae; f__Colpodella_None8550	0	0	0	0	0	0	1	0	0	0	0	0	0	0
Root; k__Eukaryota; p__Alveolata; c__Apicomplexa; o__Colpodellidae; f__Colpodella_None9888	0	0	0	0	0	0	0	0	0	0	0	1	0	0
Root; k__Eukaryota; p__Alveolata; c__Apicomplexa; o__Environmental_samples; f__Uncultured_apicomplexan_None11070	0	0	0	0	0	0	0	0	0	0	0	0	0	2
Root; k__Eukaryota; p__Alveolata; c__Apicomplexa; o__Environmental_samples; f__Uncultured_apicomplexan_None1873	0	0	0	0	0	0	0	0	0	0	0	0	0	23
Root; k__Eukaryota; p__Alveolata; c__Apicomplexa; o__Environmental_samples; f__Uncultured_apicomplexan_None6468	0	0	0	0	0	0	0	0	0	0	0	0	0	4
Root; k__Eukaryota; p__Alveolata; c__Apicomplexa; o__Gregarinia; f__Eugregarinida_70122	4	0	0	0	0	0	0	0	0	0	0	0	0	0
Root; k__Eukaryota; p__Alveolata; c__Apicomplexa; o__Gregarinia; f__Eugregarinida_None10182	0	0	0	0	53	0	0	0	0	0	0	0	0	0
Root; k__Eukaryota; p__Alveolata; c__Apicomplexa; o__Gregarinia; f__Eugregarinida_None10939	0	0	0	0	0	0	0	0	1	0	0	0	0	0
Root; k__Eukaryota; p__Alveolata; c__Apicomplexa; o__Gregarinia; f__Eugregarinida_None1519	0	0	0	0	3	0	0	2	0	1	2	3	0	0
Root; k__Eukaryota; p__Alveolata; c__Apicomplexa; o__Gregarinia; f__Eugregarinida_None1773	2	0	0	0	0	0	0	0	0	0	0	0	0	0
Root; k__Eukaryota; p__Alveolata; c__Apicomplexa; o__Gregarinia; f__Eugregarinida_None2116	0	0	0	0	0	0	0	0	0	0	1	1	0	0
Root; k__Eukaryota; p__Alveolata; c__Apicomplexa; o__Gregarinia; f__Eugregarinida_None2297	0	0	0	0	0	0	1	0	0	0	0	7	0	0
Root; k__Eukaryota; p__Alveolata; c__Apicomplexa; o__Gregarinia; f__Eugregarinida_None3121	0	0	0	0	0	0	0	1	0	0	0	0	0	0
Root; k__Eukaryota; p__Alveolata; c__Apicomplexa; o__Gregarinia; f__Eugregarinida_None3686	0	28	0	37	22	756	7	7	37	1	3	26	2	0
Root; k__Eukaryota; p__Alveolata; c__Apicomplexa; o__Gregarinia; f__Eugregarinida_None4009	0	0	0	0	0	0	0	0	14	0	0	0	0	0
Root; k__Eukaryota; p__Alveolata; c__Apicomplexa; o__Gregarinia; f__Eugregarinida_None4165	0	5	2	0	26	1	2	16	0	12	28	14	2	0
Root; k__Eukaryota; p__Alveolata; c__Apicomplexa; o__Gregarinia; f__Eugregarinida_None433	3	0	0	0	0	0	0	0	0	0	0	0	0	8
Root; k__Eukaryota; p__Alveolata; c__Apicomplexa; o__Gregarinia; f__Eugregarinida_None4404	0	0	0	0	0	0	0	0	1	0	0	2	0	0
Root; k__Eukaryota; p__Alveolata; c__Apicomplexa; o__Gregarinia; f__Eugregarinida_None4670	0	0	0	0	0	0	0	0	0	0	2	0	0	0
Root; k__Eukaryota; p__Alveolata; c__Apicomplexa; o__Gregarinia; f__Eugregarinida_None4919	0	0	0	0	1	0	0	0	0	0	0	0	0	0
Root; k__Eukaryota; p__Alveolata; c__Apicomplexa; o__Gregarinia; f__Eugregarinida_None5237	0	2	0	0	0	0	0	0	0	0	0	0	0	0
Root; k__Eukaryota; p__Alveolata; c__Apicomplexa; o__Gregarinia; f__Eugregarinida_None527	0	0	0	2	0	15	2	1	2	0	1	1	0	0
Root; k__Eukaryota; p__Alveolata; c__Apicomplexa; o__Gregarinia; f__Eugregarinida_None5787	24	0	0	0	0	0	0	0	0	0	0	0	0	0
Root; k__Eukaryota; p__Alveolata; c__Apicomplexa; o__Gregarinia; f__Eugregarinida_None731	1	0	0	0	0	0	0	0	0	0	0	0	0	0
Root; k__Eukaryota; p__Alveolata; c__Apicomplexa; o__Gregarinia; f__Eugregarinida_None74	1	0	0	0	0	0	0	0	0	0	0	0	0	0
Root; k__Eukaryota; p__Alveolata; c__Apicomplexa; o__Gregarinia; f__Eugregarinida_None748	0	0	0	0	2	0	0	0	0	0	4	3	0	0
Root; k__Eukaryota; p__Alveolata; c__Apicomplexa; o__Gregarinia; f__Eugregarinida_None7872	0	5	0	0	0	0	6	14	19	0	12	33	0	0
Root; k__Eukaryota; p__Alveolata; c__Apicomplexa; o__Gregarinia; f__Eugregarinida_None807	0	0	0	0	0	0	0	0	3	0	0	2	0	0
Root; k__Eukaryota; p__Alveolata; c__Apicomplexa; o__Gregarinia; f__Eugregarinida_None8320	0	0	0	0	0	0	0	0	0	1	1	0	0	0
Root; k__Eukaryota; p__Alveolata; c__Apicomplexa; o__Gregarinia; f__Eugregarinida_None9097	0	0	1	0	0	1	0	0	0	3	3	1	0	0
Root; k__Eukaryota; p__Alveolata; c__Apicomplexa; o__Gregarinia; f__Eugregarinida_None9360	0	0	0	0	0	3	0	0	0	0	0	0	0	0
Root; k__Eukaryota; p__Alveolata; c__Apicomplexa; o__Gregarinia; f__Eugregarinida_None9585	0	0	0	0	0	0	0	1	0	0	0	1	0	0
Root; k__Eukaryota; p__Alveolata; c__Apicomplexa; o__Gregarinia; f__Neogregarinorida_None8561	4	0	0	0	0	0	0	0	0	0	0	0	0	0
Root; k__Eukaryota; p__Alveolata; c__Apicomplexa; o__Gregarinia_None11879	1	0	0	0	0	0	0	0	0	0	0	0	0	0
Root; k__Eukaryota; p__Alveolata; c__Apicomplexa; o__Gregarinia_None12009	3	0	0	0	0	0	0	0	0	0	0	0	0	0
Root; k__Eukaryota; p__Alveolata; c__Apicomplexa; o__Gregarinia_None3178	0	0	0	0	0	0	0	0	0	1	1	0	0	0
Root; k__Eukaryota; p__Alveolata; c__Apicomplexa; o__Gregarinia_None9271	0	0	0	2	0	0	0	0	0	0	0	0	0	0
Root; k__Eukaryota; p__Alveolata; c__Apicomplexa_None10565	0	0	0	0	0	0	0	0	0	0	1	0	0	0
Root; k__Eukaryota; p__Alveolata; c__Apicomplexa_None1723	1	0	0	0	0	0	0	0	0	0	0	0	0	0
Root; k__Eukaryota; p__Alveolata; c__Apicomplexa_None6187	0	0	0	0	0	0	0	0	0	0	0	1	0	0
Root; k__Eukaryota; p__Alveolata; c__Apicomplexa_None8935	39	0	0	0	0	0	0	0	0	0	0	0	0	0
Root; k__Eukaryota; p__Alveolata; c__Ciliophora; o__Environmental_samples; f__Uncultured_ciliate_88053	0	0	0	0	0	0	0	0	0	0	3	0	1	0
Root; k__Eukaryota; p__Alveolata; c__Ciliophora; o__Intramacronucleata; f__Armophorea_None1094	0	0	0	0	1	0	0	0	0	0	0	0	0	0
Root; k__Eukaryota; p__Alveolata; c__Ciliophora; o__Intramacronucleata; f__Colpodea_104770	0	0	0	0	0	0	1	0	4	0	1	0	0	0
Root; k__Eukaryota; p__Alveolata; c__Ciliophora; o__Intramacronucleata; f__Colpodea_109606	0	0	0	0	0	3	1	0	1	2	2	0	3	70
Root; k__Eukaryota; p__Alveolata; c__Ciliophora; o__Intramacronucleata; f__Colpodea_12996	0	0	0	0	0	0	0	3	0	0	0	0	0	0
Root; k__Eukaryota; p__Alveolata; c__Ciliophora; o__Intramacronucleata; f__Colpodea_26399	0	3	0	0	0	0	0	0	0	0	0	0	0	0
Root; k__Eukaryota; p__Alveolata; c__Ciliophora; o__Intramacronucleata; f__Colpodea_28042	0	0	0	0	0	0	0	2	0	0	0	0	0	0
Root; k__Eukaryota; p__Alveolata; c__Ciliophora; o__Intramacronucleata; f__Colpodea_36222	0	0	0	0	0	0	0	0	0	0	1	0	0	92
Root; k__Eukaryota; p__Alveolata; c__Ciliophora; o__Intramacronucleata; f__Colpodea_50291	0	0	0	0	5	0	0	0	5	2	0	1	0	0
Root; k__Eukaryota; p__Alveolata; c__Ciliophora; o__Intramacronucleata; f__Colpodea_54336	0	0	0	0	0	0	0	0	0	0	0	1	0	0
Root; k__Eukaryota; p__Alveolata; c__Ciliophora; o__Intramacronucleata; f__Colpodea_63948	0	0	0	0	0	3	0	0	0	0	0	0	0	0
Root; k__Eukaryota; p__Alveolata; c__Ciliophora; o__Intramacronucleata; f__Colpodea_69215	0	0	0	3	0	0	0	4	1	1	0	0	0	0
Root; k__Eukaryota; p__Alveolata; c__Ciliophora; o__Intramacronucleata; f__Colpodea_70644	0	0	0	0	0	0	0	0	0	0	0	7	0	0
Root; k__Eukaryota; p__Alveolata; c__Ciliophora; o__Intramacronucleata; f__Colpodea_7853	0	0	0	0	0	0	0	0	0	0	64	0	0	0
Root; k__Eukaryota; p__Alveolata; c__Ciliophora; o__Intramacronucleata; f__Colpodea_83008	0	3	0	0	2	4	6	1	0	0	1	0	0	17
Root; k__Eukaryota; p__Alveolata; c__Ciliophora; o__Intramacronucleata; f__Colpodea_None10289	0	0	0	0	0	0	1	0	0	0	0	0	0	0
Root; k__Eukaryota; p__Alveolata; c__Ciliophora; o__Intramacronucleata; f__Colpodea_None10323	0	0	0	0	0	0	0	0	0	0	5	0	0	0
Root; k__Eukaryota; p__Alveolata; c__Ciliophora; o__Intramacronucleata; f__Colpodea_None10432	0	0	0	0	0	0	0	0	0	0	1	0	0	0
Root; k__Eukaryota; p__Alveolata; c__Ciliophora; o__Intramacronucleata; f__Colpodea_None10529	0	0	0	0	0	0	0	1	0	0	0	0	0	0
Root; k__Eukaryota; p__Alveolata; c__Ciliophora; o__Intramacronucleata; f__Colpodea_None10671	1	0	0	0	0	0	0	1	0	0	0	0	0	0
Root; k__Eukaryota; p__Alveolata; c__Ciliophora; o__Intramacronucleata; f__Colpodea_None10857	0	0	0	1	0	0	0	1	0	0	0	0	0	1
Root; k__Eukaryota; p__Alveolata; c__Ciliophora; o__Intramacronucleata; f__Colpodea_None11018	0	0	0	0	0	0	0	0	0	1	0	0	0	0
Root; k__Eukaryota; p__Alveolata; c__Ciliophora; o__Intramacronucleata; f__Colpodea_None1108	0	0	0	0	0	0	0	0	0	2	4	3	0	0
Root; k__Eukaryota; p__Alveolata; c__Ciliophora; o__Intramacronucleata; f__Colpodea_None1120	0	0	0	0	0	0	0	0	7	0	0	2	0	0
Root; k__Eukaryota; p__Alveolata; c__Ciliophora; o__Intramacronucleata; f__Colpodea_None11364	1	0	0	0	0	1	1	3	1	0	1	0	0	0
Root; k__Eukaryota; p__Alveolata; c__Ciliophora; o__Intramacronucleata; f__Colpodea_None11627	0	0	0	0	0	0	0	0	0	0	1	0	0	0
Root; k__Eukaryota; p__Alveolata; c__Ciliophora; o__Intramacronucleata; f__Colpodea_None11702	0	0	0	5	1	2	0	0	2	3	2	25	0	2
Root; k__Eukaryota; p__Alveolata; c__Ciliophora; o__Intramacronucleata; f__Colpodea_None11869	0	0	0	0	0	0	0	1	0	0	0	0	0	0
Root; k__Eukaryota; p__Alveolata; c__Ciliophora; o__Intramacronucleata; f__Colpodea_None1392	0	0	0	0	0	0	0	0	0	0	0	3	0	0
Root; k__Eukaryota; p__Alveolata; c__Ciliophora; o__Intramacronucleata; f__Colpodea_None1614	0	0	0	0	0	0	3	0	0	0	0	0	0	0
Root; k__Eukaryota; p__Alveolata; c__Ciliophora; o__Intramacronucleata; f__Colpodea_None1660	0	0	0	0	0	0	0	0	0	0	0	5	0	0
Root; k__Eukaryota; p__Alveolata; c__Ciliophora; o__Intramacronucleata; f__Colpodea_None1771	0	0	0	0	0	0	0	0	0	1	0	1	0	0
Root; k__Eukaryota; p__Alveolata; c__Ciliophora; o__Intramacronucleata; f__Colpodea_None1812	0	0	0	0	0	0	0	0	0	0	2	0	0	0
Root; k__Eukaryota; p__Alveolata; c__Ciliophora; o__Intramacronucleata; f__Colpodea_None1821	0	0	0	0	0	0	0	0	0	0	0	16	0	0
Root; k__Eukaryota; p__Alveolata; c__Ciliophora; o__Intramacronucleata; f__Colpodea_None1882	0	0	0	0	1	0	0	0	0	0	1	0	0	0
Root; k__Eukaryota; p__Alveolata; c__Ciliophora; o__Intramacronucleata; f__Colpodea_None1884	0	1	0	0	0	0	5	0	1	4	6	2	0	0
Root; k__Eukaryota; p__Alveolata; c__Ciliophora; o__Intramacronucleata; f__Colpodea_None2318	0	0	0	2	0	0	0	0	3	0	0	0	0	0
Root; k__Eukaryota; p__Alveolata; c__Ciliophora; o__Intramacronucleata; f__Colpodea_None2338	0	0	0	1	0	0	0	3	0	0	0	0	0	0
Root; k__Eukaryota; p__Alveolata; c__Ciliophora; o__Intramacronucleata; f__Colpodea_None2449	0	0	0	0	0	0	0	1	0	0	0	0	0	0
Root; k__Eukaryota; p__Alveolata; c__Ciliophora; o__Intramacronucleata; f__Colpodea_None2615	0	0	0	0	0	0	0	0	0	0	6	0	0	0
Root; k__Eukaryota; p__Alveolata; c__Ciliophora; o__Intramacronucleata; f__Colpodea_None2746	0	0	0	0	1	0	0	0	0	0	0	0	0	0
Root; k__Eukaryota; p__Alveolata; c__Ciliophora; o__Intramacronucleata; f__Colpodea_None280	0	0	0	0	0	0	1	0	0	0	0	0	0	0
Root; k__Eukaryota; p__Alveolata; c__Ciliophora; o__Intramacronucleata; f__Colpodea_None2849	0	0	0	0	1	0	0	0	0	0	0	0	0	0
Root; k__Eukaryota; p__Alveolata; c__Ciliophora; o__Intramacronucleata; f__Colpodea_None2992	0	0	0	0	0	0	0	0	0	0	0	0	0	6
Root; k__Eukaryota; p__Alveolata; c__Ciliophora; o__Intramacronucleata; f__Colpodea_None3219	0	0	0	0	0	0	1	0	0	0	1	0	0	0
Root; k__Eukaryota; p__Alveolata; c__Ciliophora; o__Intramacronucleata; f__Colpodea_None3240	0	0	0	0	0	0	0	0	0	0	2	0	0	0
Root; k__Eukaryota; p__Alveolata; c__Ciliophora; o__Intramacronucleata; f__Colpodea_None3334	0	0	0	0	0	0	0	0	0	0	1	0	0	0
Root; k__Eukaryota; p__Alveolata; c__Ciliophora; o__Intramacronucleata; f__Colpodea_None3340	0	0	0	0	0	1	0	0	0	0	0	0	0	0
Root; k__Eukaryota; p__Alveolata; c__Ciliophora; o__Intramacronucleata; f__Colpodea_None3350	0	0	0	0	0	0	0	0	0	0	0	6	0	0
Root; k__Eukaryota; p__Alveolata; c__Ciliophora; o__Intramacronucleata; f__Colpodea_None338	0	0	0	0	0	0	0	0	0	0	1	0	0	0
Root; k__Eukaryota; p__Alveolata; c__Ciliophora; o__Intramacronucleata; f__Colpodea_None3534	0	0	0	0	0	0	0	1	0	0	0	0	0	0
Root; k__Eukaryota; p__Alveolata; c__Ciliophora; o__Intramacronucleata; f__Colpodea_None3632	0	0	0	0	0	0	0	0	0	0	0	0	0	3
Root; k__Eukaryota; p__Alveolata; c__Ciliophora; o__Intramacronucleata; f__Colpodea_None3900	0	0	0	0	0	0	0	2	0	0	0	0	0	0
Root; k__Eukaryota; p__Alveolata; c__Ciliophora; o__Intramacronucleata; f__Colpodea_None4044	0	0	0	0	0	0	0	0	0	0	1	0	0	0
Root; k__Eukaryota; p__Alveolata; c__Ciliophora; o__Intramacronucleata; f__Colpodea_None4228	0	0	0	0	0	0	0	0	0	8	0	0	0	0
Root; k__Eukaryota; p__Alveolata; c__Ciliophora; o__Intramacronucleata; f__Colpodea_None4405	0	0	0	0	0	0	1	0	0	0	0	0	0	0
Root; k__Eukaryota; p__Alveolata; c__Ciliophora; o__Intramacronucleata; f__Colpodea_None4537	0	0	0	0	0	0	0	0	0	1	2	0	0	0
Root; k__Eukaryota; p__Alveolata; c__Ciliophora; o__Intramacronucleata; f__Colpodea_None4625	0	0	0	0	0	0	0	1	0	0	0	0	0	0
Root; k__Eukaryota; p__Alveolata; c__Ciliophora; o__Intramacronucleata; f__Colpodea_None4731	2	0	0	0	0	0	0	0	0	0	0	0	0	0
Root; k__Eukaryota; p__Alveolata; c__Ciliophora; o__Intramacronucleata; f__Colpodea_None4773	0	0	0	0	0	0	0	0	0	0	0	0	0	1
Root; k__Eukaryota; p__Alveolata; c__Ciliophora; o__Intramacronucleata; f__Colpodea_None4870	0	0	0	0	0	0	0	1	0	0	1	0	0	0
Root; k__Eukaryota; p__Alveolata; c__Ciliophora; o__Intramacronucleata; f__Colpodea_None489	0	0	0	0	0	0	1	1	0	0	0	0	0	0
Root; k__Eukaryota; p__Alveolata; c__Ciliophora; o__Intramacronucleata; f__Colpodea_None4906	1	0	0	0	0	0	0	1	0	0	1	0	0	0
Root; k__Eukaryota; p__Alveolata; c__Ciliophora; o__Intramacronucleata; f__Colpodea_None4978	0	0	0	0	0	0	0	1	0	0	0	13	0	0
Root; k__Eukaryota; p__Alveolata; c__Ciliophora; o__Intramacronucleata; f__Colpodea_None5172	0	0	0	0	0	0	0	1	0	0	0	2	0	0
Root; k__Eukaryota; p__Alveolata; c__Ciliophora; o__Intramacronucleata; f__Colpodea_None5235	0	0	0	0	0	0	0	0	0	0	15	0	0	0
Root; k__Eukaryota; p__Alveolata; c__Ciliophora; o__Intramacronucleata; f__Colpodea_None5466	0	0	0	0	0	0	0	0	0	0	0	0	0	3
Root; k__Eukaryota; p__Alveolata; c__Ciliophora; o__Intramacronucleata; f__Colpodea_None5820	0	0	0	0	0	0	0	0	0	0	0	3	0	0
Root; k__Eukaryota; p__Alveolata; c__Ciliophora; o__Intramacronucleata; f__Colpodea_None5896	0	0	0	0	0	0	0	0	0	0	2	2	0	0
Root; k__Eukaryota; p__Alveolata; c__Ciliophora; o__Intramacronucleata; f__Colpodea_None5901	9	0	0	0	0	0	0	2	0	0	1	0	0	0
Root; k__Eukaryota; p__Alveolata; c__Ciliophora; o__Intramacronucleata; f__Colpodea_None5920	0	1	0	0	0	0	0	0	1	0	0	0	0	0
Root; k__Eukaryota; p__Alveolata; c__Ciliophora; o__Intramacronucleata; f__Colpodea_None5994	0	0	0	0	0	0	1	0	0	0	0	0	0	0
Root; k__Eukaryota; p__Alveolata; c__Ciliophora; o__Intramacronucleata; f__Colpodea_None6032	0	0	0	0	0	0	0	0	0	0	0	0	0	2
Root; k__Eukaryota; p__Alveolata; c__Ciliophora; o__Intramacronucleata; f__Colpodea_None6334	0	0	0	0	0	0	0	0	0	0	0	0	0	7
Root; k__Eukaryota; p__Alveolata; c__Ciliophora; o__Intramacronucleata; f__Colpodea_None6350	0	0	0	0	0	0	0	0	0	0	0	0	0	1
Root; k__Eukaryota; p__Alveolata; c__Ciliophora; o__Intramacronucleata; f__Colpodea_None6406	0	0	0	0	0	0	0	0	0	1	0	0	0	0
Root; k__Eukaryota; p__Alveolata; c__Ciliophora; o__Intramacronucleata; f__Colpodea_None6694	0	0	0	0	0	0	0	0	0	0	0	2	0	0
Root; k__Eukaryota; p__Alveolata; c__Ciliophora; o__Intramacronucleata; f__Colpodea_None6853	0	0	0	0	0	0	0	1	0	0	0	0	0	0
Root; k__Eukaryota; p__Alveolata; c__Ciliophora; o__Intramacronucleata; f__Colpodea_None7228	0	0	0	0	0	0	0	0	0	0	3	4	0	0
Root; k__Eukaryota; p__Alveolata; c__Ciliophora; o__Intramacronucleata; f__Colpodea_None7268	0	0	0	0	0	0	0	0	0	1	0	0	0	0
Root; k__Eukaryota; p__Alveolata; c__Ciliophora; o__Intramacronucleata; f__Colpodea_None7654	0	0	0	0	0	0	0	0	0	0	1	0	0	0
Root; k__Eukaryota; p__Alveolata; c__Ciliophora; o__Intramacronucleata; f__Colpodea_None7657	0	0	0	0	0	0	0	0	0	0	0	2	0	0
Root; k__Eukaryota; p__Alveolata; c__Ciliophora; o__Intramacronucleata; f__Colpodea_None7676	0	0	0	0	0	0	0	0	0	0	0	2	0	0
Root; k__Eukaryota; p__Alveolata; c__Ciliophora; o__Intramacronucleata; f__Colpodea_None7727	0	0	0	0	0	0	0	0	0	0	0	0	0	54
Root; k__Eukaryota; p__Alveolata; c__Ciliophora; o__Intramacronucleata; f__Colpodea_None7784	0	0	0	0	0	1	0	0	0	0	0	0	0	0
Root; k__Eukaryota; p__Alveolata; c__Ciliophora; o__Intramacronucleata; f__Colpodea_None7821	0	0	0	1	0	2	0	6	2	1	0	0	0	0
Root; k__Eukaryota; p__Alveolata; c__Ciliophora; o__Intramacronucleata; f__Colpodea_None79	0	0	0	0	0	0	0	0	0	0	0	0	0	1
Root; k__Eukaryota; p__Alveolata; c__Ciliophora; o__Intramacronucleata; f__Colpodea_None7915	0	0	0	0	0	0	0	0	0	1	0	2	0	0
Root; k__Eukaryota; p__Alveolata; c__Ciliophora; o__Intramacronucleata; f__Colpodea_None7985	0	0	0	0	0	0	0	0	0	0	0	0	0	8
Root; k__Eukaryota; p__Alveolata; c__Ciliophora; o__Intramacronucleata; f__Colpodea_None8098	0	0	0	0	0	0	0	0	0	0	0	0	0	1
Root; k__Eukaryota; p__Alveolata; c__Ciliophora; o__Intramacronucleata; f__Colpodea_None8147	0	0	0	0	0	0	0	0	0	0	0	0	0	9
Root; k__Eukaryota; p__Alveolata; c__Ciliophora; o__Intramacronucleata; f__Colpodea_None8485	0	0	0	0	0	0	0	0	0	2	0	0	0	0
Root; k__Eukaryota; p__Alveolata; c__Ciliophora; o__Intramacronucleata; f__Colpodea_None8556	0	0	0	0	0	0	1	0	3	0	2	3	0	1
Root; k__Eukaryota; p__Alveolata; c__Ciliophora; o__Intramacronucleata; f__Colpodea_None8714	0	0	0	0	0	0	0	0	0	0	0	0	0	3
Root; k__Eukaryota; p__Alveolata; c__Ciliophora; o__Intramacronucleata; f__Colpodea_None8772	0	0	0	0	0	0	0	0	0	2	13	1	0	0
Root; k__Eukaryota; p__Alveolata; c__Ciliophora; o__Intramacronucleata; f__Colpodea_None8916	0	0	0	0	0	0	0	0	1	0	0	0	0	0
Root; k__Eukaryota; p__Alveolata; c__Ciliophora; o__Intramacronucleata; f__Colpodea_None8946	0	0	0	0	0	0	0	0	0	1	0	3	0	0
Root; k__Eukaryota; p__Alveolata; c__Ciliophora; o__Intramacronucleata; f__Colpodea_None9150	0	0	0	0	0	0	0	0	0	0	3	0	0	0
Root; k__Eukaryota; p__Alveolata; c__Ciliophora; o__Intramacronucleata; f__Colpodea_None9177	0	0	0	0	0	0	0	0	0	0	0	0	0	26
Root; k__Eukaryota; p__Alveolata; c__Ciliophora; o__Intramacronucleata; f__Colpodea_None9334	0	0	0	0	0	0	0	0	2	0	0	0	0	5
Root; k__Eukaryota; p__Alveolata; c__Ciliophora; o__Intramacronucleata; f__Colpodea_None971	0	0	0	0	0	0	0	0	0	0	0	1	0	0
Root; k__Eukaryota; p__Alveolata; c__Ciliophora; o__Intramacronucleata; f__Colpodea_None9735	0	0	0	0	0	0	0	0	0	0	1	0	0	0
Root; k__Eukaryota; p__Alveolata; c__Ciliophora; o__Intramacronucleata; f__Colpodea_None9893	0	0	0	0	0	0	0	0	0	0	0	3	0	0
Root; k__Eukaryota; p__Alveolata; c__Ciliophora; o__Intramacronucleata; f__Colpodea_None9945	0	0	0	0	0	0	0	0	1	0	0	0	0	0
Root; k__Eukaryota; p__Alveolata; c__Ciliophora; o__Intramacronucleata; f__Colpodea_None9962	0	0	0	0	8	0	0	0	0	0	24	41	0	0
Root; k__Eukaryota; p__Alveolata; c__Ciliophora; o__Intramacronucleata; f__Litostomatea_113306	0	0	0	0	0	0	2	0	0	0	0	1	0	0
Root; k__Eukaryota; p__Alveolata; c__Ciliophora; o__Intramacronucleata; f__Litostomatea_11429	0	0	0	0	0	0	1	0	0	0	0	0	0	36
Root; k__Eukaryota; p__Alveolata; c__Ciliophora; o__Intramacronucleata; f__Litostomatea_21239	0	0	0	0	0	0	18	2	0	0	0	0	0	1
Root; k__Eukaryota; p__Alveolata; c__Ciliophora; o__Intramacronucleata; f__Litostomatea_21925	0	0	0	0	0	4	2	0	0	1	4	1	0	1
Root; k__Eukaryota; p__Alveolata; c__Ciliophora; o__Intramacronucleata; f__Litostomatea_37646	0	0	0	0	0	0	2	6	0	2	0	0	1	0
Root; k__Eukaryota; p__Alveolata; c__Ciliophora; o__Intramacronucleata; f__Litostomatea_45273	0	0	0	0	0	0	1	0	5	0	0	0	0	0
Root; k__Eukaryota; p__Alveolata; c__Ciliophora; o__Intramacronucleata; f__Litostomatea_50887	0	0	0	0	0	0	0	2	0	0	0	0	0	0
Root; k__Eukaryota; p__Alveolata; c__Ciliophora; o__Intramacronucleata; f__Litostomatea_58385	0	1	1	0	0	0	47	0	5	0	14	0	3	11
Root; k__Eukaryota; p__Alveolata; c__Ciliophora; o__Intramacronucleata; f__Litostomatea_63308	0	0	0	0	0	0	0	0	0	0	1	0	1	0
Root; k__Eukaryota; p__Alveolata; c__Ciliophora; o__Intramacronucleata; f__Litostomatea_80702	0	0	0	0	0	0	0	0	0	14	0	0	0	0
Root; k__Eukaryota; p__Alveolata; c__Ciliophora; o__Intramacronucleata; f__Litostomatea_91402	0	0	0	0	0	0	3	2	1	0	0	0	0	39
Root; k__Eukaryota; p__Alveolata; c__Ciliophora; o__Intramacronucleata; f__Litostomatea_99861	0	0	0	0	0	0	0	3	0	0	0	0	0	0
Root; k__Eukaryota; p__Alveolata; c__Ciliophora; o__Intramacronucleata; f__Litostomatea_None10442	0	0	0	0	0	0	1	0	0	0	0	0	0	0
Root; k__Eukaryota; p__Alveolata; c__Ciliophora; o__Intramacronucleata; f__Litostomatea_None10458	0	0	0	0	0	0	4	0	1	0	0	0	1	0
Root; k__Eukaryota; p__Alveolata; c__Ciliophora; o__Intramacronucleata; f__Litostomatea_None10486	0	0	0	0	0	0	3	0	0	0	0	0	0	1
Root; k__Eukaryota; p__Alveolata; c__Ciliophora; o__Intramacronucleata; f__Litostomatea_None1049	0	0	0	0	0	0	0	0	0	5	0	0	0	0
Root; k__Eukaryota; p__Alveolata; c__Ciliophora; o__Intramacronucleata; f__Litostomatea_None10720	0	0	0	0	0	0	1	0	0	0	0	0	0	0
Root; k__Eukaryota; p__Alveolata; c__Ciliophora; o__Intramacronucleata; f__Litostomatea_None11024	0	0	0	0	0	0	0	0	0	0	1	0	0	0
Root; k__Eukaryota; p__Alveolata; c__Ciliophora; o__Intramacronucleata; f__Litostomatea_None11130	0	0	0	0	0	0	3	0	0	0	0	0	0	0
Root; k__Eukaryota; p__Alveolata; c__Ciliophora; o__Intramacronucleata; f__Litostomatea_None11222	0	0	0	0	0	0	0	3	1	0	0	0	0	0
Root; k__Eukaryota; p__Alveolata; c__Ciliophora; o__Intramacronucleata; f__Litostomatea_None11362	0	0	0	0	0	0	0	0	0	0	0	0	0	1
Root; k__Eukaryota; p__Alveolata; c__Ciliophora; o__Intramacronucleata; f__Litostomatea_None11485	0	0	0	0	0	0	3	0	0	0	0	0	0	4
Root; k__Eukaryota; p__Alveolata; c__Ciliophora; o__Intramacronucleata; f__Litostomatea_None11755	0	0	0	0	0	0	0	0	0	1	0	0	0	0
Root; k__Eukaryota; p__Alveolata; c__Ciliophora; o__Intramacronucleata; f__Litostomatea_None11811	0	0	1	0	0	0	0	0	0	0	0	0	0	0
Root; k__Eukaryota; p__Alveolata; c__Ciliophora; o__Intramacronucleata; f__Litostomatea_None146	0	0	0	0	0	1	0	0	0	0	0	0	0	0
Root; k__Eukaryota; p__Alveolata; c__Ciliophora; o__Intramacronucleata; f__Litostomatea_None1539	0	0	0	0	0	0	0	0	0	0	0	0	0	5
Root; k__Eukaryota; p__Alveolata; c__Ciliophora; o__Intramacronucleata; f__Litostomatea_None1700	0	0	0	0	0	0	0	0	0	8	0	0	0	0
Root; k__Eukaryota; p__Alveolata; c__Ciliophora; o__Intramacronucleata; f__Litostomatea_None1750	0	0	0	0	0	0	0	0	0	0	0	2	0	0
Root; k__Eukaryota; p__Alveolata; c__Ciliophora; o__Intramacronucleata; f__Litostomatea_None1859	0	0	0	0	0	0	0	0	0	0	0	0	0	2
Root; k__Eukaryota; p__Alveolata; c__Ciliophora; o__Intramacronucleata; f__Litostomatea_None1872	0	0	0	0	0	0	3	0	0	0	0	0	0	0
Root; k__Eukaryota; p__Alveolata; c__Ciliophora; o__Intramacronucleata; f__Litostomatea_None1899	0	0	0	0	0	0	0	0	0	4	0	0	0	0
Root; k__Eukaryota; p__Alveolata; c__Ciliophora; o__Intramacronucleata; f__Litostomatea_None2058	0	0	0	0	0	0	0	0	0	0	2	0	0	1
Root; k__Eukaryota; p__Alveolata; c__Ciliophora; o__Intramacronucleata; f__Litostomatea_None2094	0	0	0	0	0	0	0	0	0	2	0	0	0	0
Root; k__Eukaryota; p__Alveolata; c__Ciliophora; o__Intramacronucleata; f__Litostomatea_None2100	0	0	0	0	0	0	0	2	2	0	0	0	0	0
Root; k__Eukaryota; p__Alveolata; c__Ciliophora; o__Intramacronucleata; f__Litostomatea_None2102	0	0	0	0	0	0	0	0	0	0	0	0	0	2
Root; k__Eukaryota; p__Alveolata; c__Ciliophora; o__Intramacronucleata; f__Litostomatea_None2113	0	0	0	0	0	0	13	4	1	0	0	0	0	17
Root; k__Eukaryota; p__Alveolata; c__Ciliophora; o__Intramacronucleata; f__Litostomatea_None2139	0	0	0	0	0	0	3	0	0	0	0	0	0	0
Root; k__Eukaryota; p__Alveolata; c__Ciliophora; o__Intramacronucleata; f__Litostomatea_None2235	0	0	0	0	0	0	0	0	0	0	0	0	0	2
Root; k__Eukaryota; p__Alveolata; c__Ciliophora; o__Intramacronucleata; f__Litostomatea_None2349	0	0	0	0	0	0	0	2	0	0	0	0	0	0
Root; k__Eukaryota; p__Alveolata; c__Ciliophora; o__Intramacronucleata; f__Litostomatea_None2640	0	0	0	0	0	0	0	1	0	0	0	0	0	0
Root; k__Eukaryota; p__Alveolata; c__Ciliophora; o__Intramacronucleata; f__Litostomatea_None2683	0	0	0	0	0	0	1	0	0	0	0	1	0	0
Root; k__Eukaryota; p__Alveolata; c__Ciliophora; o__Intramacronucleata; f__Litostomatea_None2976	0	0	0	0	0	0	0	0	0	0	0	0	0	1
Root; k__Eukaryota; p__Alveolata; c__Ciliophora; o__Intramacronucleata; f__Litostomatea_None30	0	0	0	0	0	0	1	0	0	0	0	0	0	0
Root; k__Eukaryota; p__Alveolata; c__Ciliophora; o__Intramacronucleata; f__Litostomatea_None3435	0	0	0	0	0	0	0	0	0	1	0	0	0	0
Root; k__Eukaryota; p__Alveolata; c__Ciliophora; o__Intramacronucleata; f__Litostomatea_None3673	0	0	0	0	0	0	1	0	0	0	0	0	0	0
Root; k__Eukaryota; p__Alveolata; c__Ciliophora; o__Intramacronucleata; f__Litostomatea_None374	0	0	0	0	0	0	1	0	1	0	0	1	0	2
Root; k__Eukaryota; p__Alveolata; c__Ciliophora; o__Intramacronucleata; f__Litostomatea_None3968	0	0	0	0	0	0	0	0	0	0	0	0	0	46
Root; k__Eukaryota; p__Alveolata; c__Ciliophora; o__Intramacronucleata; f__Litostomatea_None4657	0	0	0	0	0	0	1	0	0	0	0	0	0	0
Root; k__Eukaryota; p__Alveolata; c__Ciliophora; o__Intramacronucleata; f__Litostomatea_None4671	0	0	0	0	0	0	1	0	0	0	2	0	0	0
Root; k__Eukaryota; p__Alveolata; c__Ciliophora; o__Intramacronucleata; f__Litostomatea_None4678	0	0	0	0	0	0	1	0	0	0	0	1	0	0
Root; k__Eukaryota; p__Alveolata; c__Ciliophora; o__Intramacronucleata; f__Litostomatea_None4686	0	0	0	0	0	0	0	0	0	52	0	0	0	0
Root; k__Eukaryota; p__Alveolata; c__Ciliophora; o__Intramacronucleata; f__Litostomatea_None4829	0	0	0	0	0	0	0	0	0	0	1	0	0	0
Root; k__Eukaryota; p__Alveolata; c__Ciliophora; o__Intramacronucleata; f__Litostomatea_None4884	0	0	0	0	1	0	16	0	0	0	0	0	0	0
Root; k__Eukaryota; p__Alveolata; c__Ciliophora; o__Intramacronucleata; f__Litostomatea_None5418	0	0	0	0	0	0	0	0	3	0	0	0	0	0
Root; k__Eukaryota; p__Alveolata; c__Ciliophora; o__Intramacronucleata; f__Litostomatea_None5585	0	0	0	0	0	0	1	0	0	0	0	0	0	0
Root; k__Eukaryota; p__Alveolata; c__Ciliophora; o__Intramacronucleata; f__Litostomatea_None559	0	0	0	0	0	0	0	0	1	0	0	0	0	0
Root; k__Eukaryota; p__Alveolata; c__Ciliophora; o__Intramacronucleata; f__Litostomatea_None5655	0	0	0	0	0	0	0	0	0	0	0	0	0	1
Root; k__Eukaryota; p__Alveolata; c__Ciliophora; o__Intramacronucleata; f__Litostomatea_None5891	0	1	0	0	0	0	0	0	0	0	0	0	0	0
Root; k__Eukaryota; p__Alveolata; c__Ciliophora; o__Intramacronucleata; f__Litostomatea_None5919	0	0	0	0	0	0	0	0	1	0	0	0	0	0
Root; k__Eukaryota; p__Alveolata; c__Ciliophora; o__Intramacronucleata; f__Litostomatea_None5956	0	0	0	0	0	0	0	0	0	0	0	0	0	2
Root; k__Eukaryota; p__Alveolata; c__Ciliophora; o__Intramacronucleata; f__Litostomatea_None611	0	0	0	0	0	0	0	1	0	0	0	0	0	0
Root; k__Eukaryota; p__Alveolata; c__Ciliophora; o__Intramacronucleata; f__Litostomatea_None6267	0	0	0	0	0	0	1	0	0	0	0	0	0	0
Root; k__Eukaryota; p__Alveolata; c__Ciliophora; o__Intramacronucleata; f__Litostomatea_None6369	0	0	0	0	0	0	3	0	0	0	0	0	0	0
Root; k__Eukaryota; p__Alveolata; c__Ciliophora; o__Intramacronucleata; f__Litostomatea_None642	0	0	0	0	0	0	2	0	0	0	0	0	0	0
Root; k__Eukaryota; p__Alveolata; c__Ciliophora; o__Intramacronucleata; f__Litostomatea_None6709	0	0	0	0	0	0	0	2	3	0	0	0	0	0
Root; k__Eukaryota; p__Alveolata; c__Ciliophora; o__Intramacronucleata; f__Litostomatea_None6712	0	0	1	0	2	0	15	38	38	0	0	2	3	78
Root; k__Eukaryota; p__Alveolata; c__Ciliophora; o__Intramacronucleata; f__Litostomatea_None6729	0	0	0	0	0	0	0	0	0	0	0	0	0	1
Root; k__Eukaryota; p__Alveolata; c__Ciliophora; o__Intramacronucleata; f__Litostomatea_None6835	0	0	0	0	0	0	0	0	0	1	0	0	0	0
Root; k__Eukaryota; p__Alveolata; c__Ciliophora; o__Intramacronucleata; f__Litostomatea_None7182	0	0	0	0	0	0	0	0	0	1	0	0	0	0
Root; k__Eukaryota; p__Alveolata; c__Ciliophora; o__Intramacronucleata; f__Litostomatea_None7273	0	0	0	0	0	0	1	0	0	0	0	0	0	12
Root; k__Eukaryota; p__Alveolata; c__Ciliophora; o__Intramacronucleata; f__Litostomatea_None7629	0	0	0	0	0	0	1	0	0	0	0	0	0	0
Root; k__Eukaryota; p__Alveolata; c__Ciliophora; o__Intramacronucleata; f__Litostomatea_None7658	0	0	0	0	0	0	0	0	1	0	0	0	0	0
Root; k__Eukaryota; p__Alveolata; c__Ciliophora; o__Intramacronucleata; f__Litostomatea_None7732	0	0	0	0	0	0	0	0	0	0	0	0	1	3
Root; k__Eukaryota; p__Alveolata; c__Ciliophora; o__Intramacronucleata; f__Litostomatea_None7959	0	0	0	0	0	0	0	2	0	0	0	0	0	0
Root; k__Eukaryota; p__Alveolata; c__Ciliophora; o__Intramacronucleata; f__Litostomatea_None8050	0	0	0	0	0	0	0	0	0	0	1	0	0	0
Root; k__Eukaryota; p__Alveolata; c__Ciliophora; o__Intramacronucleata; f__Litostomatea_None8165	0	0	0	0	0	0	0	0	0	0	1	0	0	0
Root; k__Eukaryota; p__Alveolata; c__Ciliophora; o__Intramacronucleata; f__Litostomatea_None822	0	0	0	0	0	0	3	0	0	0	0	0	0	0
Root; k__Eukaryota; p__Alveolata; c__Ciliophora; o__Intramacronucleata; f__Litostomatea_None8383	0	0	0	0	0	0	0	3	3	0	0	0	0	0
Root; k__Eukaryota; p__Alveolata; c__Ciliophora; o__Intramacronucleata; f__Litostomatea_None8470	0	0	0	0	0	0	2	0	0	0	2	0	0	0
Root; k__Eukaryota; p__Alveolata; c__Ciliophora; o__Intramacronucleata; f__Litostomatea_None8570	0	0	0	0	0	0	1	0	0	0	0	0	0	0
Root; k__Eukaryota; p__Alveolata; c__Ciliophora; o__Intramacronucleata; f__Litostomatea_None8600	0	0	0	0	0	0	0	0	0	1	0	0	0	0
Root; k__Eukaryota; p__Alveolata; c__Ciliophora; o__Intramacronucleata; f__Litostomatea_None8780	0	0	0	0	0	0	0	0	0	0	1	0	0	0
Root; k__Eukaryota; p__Alveolata; c__Ciliophora; o__Intramacronucleata; f__Litostomatea_None889	0	0	0	0	0	0	5	0	0	0	0	0	0	0
Root; k__Eukaryota; p__Alveolata; c__Ciliophora; o__Intramacronucleata; f__Litostomatea_None8907	0	0	0	0	0	0	0	0	0	0	0	0	0	1
Root; k__Eukaryota; p__Alveolata; c__Ciliophora; o__Intramacronucleata; f__Litostomatea_None8920	0	0	0	0	0	0	3	0	0	0	0	0	1	0
Root; k__Eukaryota; p__Alveolata; c__Ciliophora; o__Intramacronucleata; f__Litostomatea_None9067	0	0	0	0	0	0	3	0	0	0	0	0	0	0
Root; k__Eukaryota; p__Alveolata; c__Ciliophora; o__Intramacronucleata; f__Litostomatea_None925	0	0	1	0	0	0	0	0	0	0	1	0	0	0
Root; k__Eukaryota; p__Alveolata; c__Ciliophora; o__Intramacronucleata; f__Litostomatea_None9379	0	0	0	0	0	0	6	0	0	0	0	0	0	0
Root; k__Eukaryota; p__Alveolata; c__Ciliophora; o__Intramacronucleata; f__Litostomatea_None9434	0	0	0	0	0	0	0	0	0	0	3	1	0	0
Root; k__Eukaryota; p__Alveolata; c__Ciliophora; o__Intramacronucleata; f__Litostomatea_None9563	0	0	0	0	0	0	0	0	0	1	0	0	0	0
Root; k__Eukaryota; p__Alveolata; c__Ciliophora; o__Intramacronucleata; f__Litostomatea_None9765	0	0	0	0	0	0	2	0	0	0	0	0	0	0
Root; k__Eukaryota; p__Alveolata; c__Ciliophora; o__Intramacronucleata; f__Litostomatea_None989	0	0	0	0	0	0	0	0	0	1	0	0	0	0
Root; k__Eukaryota; p__Alveolata; c__Ciliophora; o__Intramacronucleata; f__Nassophorea_100361	0	0	0	0	0	0	0	0	0	5	0	0	0	0
Root; k__Eukaryota; p__Alveolata; c__Ciliophora; o__Intramacronucleata; f__Nassophorea_67789	0	0	0	0	1	0	0	0	0	0	0	2	0	0
Root; k__Eukaryota; p__Alveolata; c__Ciliophora; o__Intramacronucleata; f__Nassophorea_73588	0	4	0	0	0	0	0	9	0	0	2	0	0	0
Root; k__Eukaryota; p__Alveolata; c__Ciliophora; o__Intramacronucleata; f__Nassophorea_90168	0	0	0	0	0	3	7	0	0	0	3	1	0	0
Root; k__Eukaryota; p__Alveolata; c__Ciliophora; o__Intramacronucleata; f__Nassophorea_None1014	0	1	0	0	0	0	0	0	0	0	0	0	0	0
Root; k__Eukaryota; p__Alveolata; c__Ciliophora; o__Intramacronucleata; f__Nassophorea_None10169	0	2	0	0	0	0	0	1	0	0	0	0	0	0
Root; k__Eukaryota; p__Alveolata; c__Ciliophora; o__Intramacronucleata; f__Nassophorea_None10655	0	0	0	0	0	1	0	0	0	0	0	0	0	0
Root; k__Eukaryota; p__Alveolata; c__Ciliophora; o__Intramacronucleata; f__Nassophorea_None10683	0	0	0	0	0	4	0	0	0	0	0	0	0	0
Root; k__Eukaryota; p__Alveolata; c__Ciliophora; o__Intramacronucleata; f__Nassophorea_None11508	0	0	0	0	0	1	0	0	0	0	0	0	0	0
Root; k__Eukaryota; p__Alveolata; c__Ciliophora; o__Intramacronucleata; f__Nassophorea_None11559	0	0	0	0	0	0	0	0	0	0	0	1	0	0
Root; k__Eukaryota; p__Alveolata; c__Ciliophora; o__Intramacronucleata; f__Nassophorea_None11624	0	0	0	0	0	0	0	0	1	1	0	0	0	0
Root; k__Eukaryota; p__Alveolata; c__Ciliophora; o__Intramacronucleata; f__Nassophorea_None11682	0	0	0	0	0	0	0	2	0	0	0	0	0	0
Root; k__Eukaryota; p__Alveolata; c__Ciliophora; o__Intramacronucleata; f__Nassophorea_None1931	0	0	1	0	0	2	0	0	0	0	0	0	0	0
Root; k__Eukaryota; p__Alveolata; c__Ciliophora; o__Intramacronucleata; f__Nassophorea_None2795	0	0	0	0	0	0	10	0	0	0	0	0	1	0
Root; k__Eukaryota; p__Alveolata; c__Ciliophora; o__Intramacronucleata; f__Nassophorea_None2798	0	1	0	2	0	8	4	0	0	0	0	0	0	0
Root; k__Eukaryota; p__Alveolata; c__Ciliophora; o__Intramacronucleata; f__Nassophorea_None3687	0	0	0	0	0	0	0	4	0	0	0	0	0	0
Root; k__Eukaryota; p__Alveolata; c__Ciliophora; o__Intramacronucleata; f__Nassophorea_None3973	0	0	0	0	0	0	0	1	0	0	1	2	0	0
Root; k__Eukaryota; p__Alveolata; c__Ciliophora; o__Intramacronucleata; f__Nassophorea_None4986	0	1	0	0	0	0	0	0	0	0	0	0	0	0
Root; k__Eukaryota; p__Alveolata; c__Ciliophora; o__Intramacronucleata; f__Nassophorea_None5000	0	0	0	0	1	0	0	0	0	0	0	0	0	22
Root; k__Eukaryota; p__Alveolata; c__Ciliophora; o__Intramacronucleata; f__Nassophorea_None5003	0	2	0	0	0	0	0	2	0	0	0	0	0	0
Root; k__Eukaryota; p__Alveolata; c__Ciliophora; o__Intramacronucleata; f__Nassophorea_None505	0	0	0	0	0	0	0	0	0	0	0	0	0	1
Root; k__Eukaryota; p__Alveolata; c__Ciliophora; o__Intramacronucleata; f__Nassophorea_None5388	0	0	0	0	0	0	0	12	0	0	5	2	0	0
Root; k__Eukaryota; p__Alveolata; c__Ciliophora; o__Intramacronucleata; f__Nassophorea_None5683	0	1	0	0	0	0	0	0	0	0	0	0	0	0
Root; k__Eukaryota; p__Alveolata; c__Ciliophora; o__Intramacronucleata; f__Nassophorea_None576	0	0	0	0	1	0	1	0	0	0	0	2	0	0
Root; k__Eukaryota; p__Alveolata; c__Ciliophora; o__Intramacronucleata; f__Nassophorea_None6613	0	0	0	0	0	1	0	0	0	0	0	0	0	0
Root; k__Eukaryota; p__Alveolata; c__Ciliophora; o__Intramacronucleata; f__Nassophorea_None683	0	1	0	0	0	0	0	0	0	0	0	0	0	0
Root; k__Eukaryota; p__Alveolata; c__Ciliophora; o__Intramacronucleata; f__Nassophorea_None7029	0	4	2	0	0	90	0	0	0	0	0	0	0	0
Root; k__Eukaryota; p__Alveolata; c__Ciliophora; o__Intramacronucleata; f__Nassophorea_None7048	0	0	1	0	0	0	4	0	0	0	0	1	0	0
Root; k__Eukaryota; p__Alveolata; c__Ciliophora; o__Intramacronucleata; f__Nassophorea_None7440	0	0	0	0	0	2	0	0	0	0	0	0	0	0
Root; k__Eukaryota; p__Alveolata; c__Ciliophora; o__Intramacronucleata; f__Nassophorea_None755	0	0	0	0	0	0	0	0	0	0	2	0	0	0
Root; k__Eukaryota; p__Alveolata; c__Ciliophora; o__Intramacronucleata; f__Nassophorea_None8238	0	0	0	0	0	0	0	0	0	0	1	0	0	0
Root; k__Eukaryota; p__Alveolata; c__Ciliophora; o__Intramacronucleata; f__Nassophorea_None869	0	0	0	0	0	1	0	0	0	0	0	0	0	0
Root; k__Eukaryota; p__Alveolata; c__Ciliophora; o__Intramacronucleata; f__Nassophorea_None9048	0	1	0	0	0	0	0	0	0	0	0	0	0	0
Root; k__Eukaryota; p__Alveolata; c__Ciliophora; o__Intramacronucleata; f__Nassophorea_None9104	0	0	0	0	0	0	0	1	0	0	0	0	0	0
Root; k__Eukaryota; p__Alveolata; c__Ciliophora; o__Intramacronucleata; f__Nassophorea_None9166	0	0	1	0	0	3	0	0	0	0	0	0	0	0
Root; k__Eukaryota; p__Alveolata; c__Ciliophora; o__Intramacronucleata; f__Nassophorea_None9411	0	0	0	0	0	0	7	0	0	0	0	0	0	0
Root; k__Eukaryota; p__Alveolata; c__Ciliophora; o__Intramacronucleata; f__Oligohymenophorea_10348	0	0	0	0	0	0	0	0	1	0	0	0	0	5
Root; k__Eukaryota; p__Alveolata; c__Ciliophora; o__Intramacronucleata; f__Oligohymenophorea_108870	0	0	3	0	0	14	0	0	0	0	0	0	0	0
Root; k__Eukaryota; p__Alveolata; c__Ciliophora; o__Intramacronucleata; f__Oligohymenophorea_111298	0	1	0	0	0	0	0	8	0	0	0	0	0	0
Root; k__Eukaryota; p__Alveolata; c__Ciliophora; o__Intramacronucleata; f__Oligohymenophorea_111474	0	0	0	0	13	0	14	0	131	0	0	0	1	0
Root; k__Eukaryota; p__Alveolata; c__Ciliophora; o__Intramacronucleata; f__Oligohymenophorea_113523	0	0	0	0	1	0	5	99	0	0	0	0	0	0
Root; k__Eukaryota; p__Alveolata; c__Ciliophora; o__Intramacronucleata; f__Oligohymenophorea_13702	0	0	0	0	0	0	0	0	0	0	0	0	0	40
Root; k__Eukaryota; p__Alveolata; c__Ciliophora; o__Intramacronucleata; f__Oligohymenophorea_19432	0	0	0	0	0	0	0	0	0	0	0	0	0	44
Root; k__Eukaryota; p__Alveolata; c__Ciliophora; o__Intramacronucleata; f__Oligohymenophorea_22781	0	0	0	3	0	1	3	291	88	2	0	12	2	84
Root; k__Eukaryota; p__Alveolata; c__Ciliophora; o__Intramacronucleata; f__Oligohymenophorea_31356	0	0	0	0	0	0	0	0	0	3	0	0	0	0
Root; k__Eukaryota; p__Alveolata; c__Ciliophora; o__Intramacronucleata; f__Oligohymenophorea_33932	0	1	0	0	0	0	32	0	0	0	0	0	0	0
Root; k__Eukaryota; p__Alveolata; c__Ciliophora; o__Intramacronucleata; f__Oligohymenophorea_51601	0	0	0	0	0	0	0	0	0	0	1	0	0	0
Root; k__Eukaryota; p__Alveolata; c__Ciliophora; o__Intramacronucleata; f__Oligohymenophorea_51864	0	0	0	0	0	0	0	0	6	0	0	0	0	0
Root; k__Eukaryota; p__Alveolata; c__Ciliophora; o__Intramacronucleata; f__Oligohymenophorea_56808	0	0	0	0	0	0	0	12	2	0	0	0	10	540
Root; k__Eukaryota; p__Alveolata; c__Ciliophora; o__Intramacronucleata; f__Oligohymenophorea_63214	0	0	0	0	0	0	25	0	0	0	0	0	0	653
Root; k__Eukaryota; p__Alveolata; c__Ciliophora; o__Intramacronucleata; f__Oligohymenophorea_66675	0	0	0	0	0	0	0	0	2	0	0	0	0	1436
Root; k__Eukaryota; p__Alveolata; c__Ciliophora; o__Intramacronucleata; f__Oligohymenophorea_73407	0	1	0	4	5	3	3	2	4	0	3	82	2	199
Root; k__Eukaryota; p__Alveolata; c__Ciliophora; o__Intramacronucleata; f__Oligohymenophorea_80349	0	0	0	0	0	0	0	0	4	0	0	0	0	0
Root; k__Eukaryota; p__Alveolata; c__Ciliophora; o__Intramacronucleata; f__Oligohymenophorea_81625	3	0	1	0	0	1	1	3	7	7	42	12	0	86
Root; k__Eukaryota; p__Alveolata; c__Ciliophora; o__Intramacronucleata; f__Oligohymenophorea_82077	0	0	0	0	0	0	0	0	0	0	0	28	0	0
Root; k__Eukaryota; p__Alveolata; c__Ciliophora; o__Intramacronucleata; f__Oligohymenophorea_83552	0	0	0	0	0	0	0	0	0	0	0	1	0	10
Root; k__Eukaryota; p__Alveolata; c__Ciliophora; o__Intramacronucleata; f__Oligohymenophorea_92568	0	23	8	173	0	3	0	31	18	48	8	11	0	2
Root; k__Eukaryota; p__Alveolata; c__Ciliophora; o__Intramacronucleata; f__Oligohymenophorea_97576	0	1	0	0	0	3	10	0	1	0	1	0	0	32
Root; k__Eukaryota; p__Alveolata; c__Ciliophora; o__Intramacronucleata; f__Oligohymenophorea_None100	0	0	0	0	0	0	0	1	0	0	0	0	0	0
Root; k__Eukaryota; p__Alveolata; c__Ciliophora; o__Intramacronucleata; f__Oligohymenophorea_None10002	0	0	0	0	0	0	0	0	0	0	1	0	0	0
Root; k__Eukaryota; p__Alveolata; c__Ciliophora; o__Intramacronucleata; f__Oligohymenophorea_None10049	0	0	0	1	0	0	0	0	0	0	0	0	0	0
Root; k__Eukaryota; p__Alveolata; c__Ciliophora; o__Intramacronucleata; f__Oligohymenophorea_None10074	0	0	0	0	0	0	0	0	0	0	0	0	0	17
Root; k__Eukaryota; p__Alveolata; c__Ciliophora; o__Intramacronucleata; f__Oligohymenophorea_None10091	0	0	0	0	0	0	0	0	0	0	0	0	0	18
Root; k__Eukaryota; p__Alveolata; c__Ciliophora; o__Intramacronucleata; f__Oligohymenophorea_None10099	0	0	0	0	0	0	0	0	0	0	0	0	0	8
Root; k__Eukaryota; p__Alveolata; c__Ciliophora; o__Intramacronucleata; f__Oligohymenophorea_None10171	0	0	0	0	0	0	5	2	1	8	15	28	0	0
Root; k__Eukaryota; p__Alveolata; c__Ciliophora; o__Intramacronucleata; f__Oligohymenophorea_None10190	0	0	0	0	0	0	0	0	0	0	0	2	0	0
Root; k__Eukaryota; p__Alveolata; c__Ciliophora; o__Intramacronucleata; f__Oligohymenophorea_None10259	0	0	0	0	0	0	0	0	0	0	0	0	0	2
Root; k__Eukaryota; p__Alveolata; c__Ciliophora; o__Intramacronucleata; f__Oligohymenophorea_None10285	0	0	0	0	0	0	0	0	3	0	0	0	0	0
Root; k__Eukaryota; p__Alveolata; c__Ciliophora; o__Intramacronucleata; f__Oligohymenophorea_None10315	0	0	0	0	0	0	0	0	0	0	0	0	0	1
Root; k__Eukaryota; p__Alveolata; c__Ciliophora; o__Intramacronucleata; f__Oligohymenophorea_None10354	0	0	0	0	0	0	0	0	0	0	0	0	0	24
Root; k__Eukaryota; p__Alveolata; c__Ciliophora; o__Intramacronucleata; f__Oligohymenophorea_None1046	0	0	0	0	0	0	0	0	0	0	0	0	0	16
Root; k__Eukaryota; p__Alveolata; c__Ciliophora; o__Intramacronucleata; f__Oligohymenophorea_None10495	0	0	0	0	0	0	4	0	0	0	3	0	0	0
Root; k__Eukaryota; p__Alveolata; c__Ciliophora; o__Intramacronucleata; f__Oligohymenophorea_None10513	0	0	0	0	0	0	0	0	0	0	1	0	0	3
Root; k__Eukaryota; p__Alveolata; c__Ciliophora; o__Intramacronucleata; f__Oligohymenophorea_None10545	0	0	0	0	0	1	0	0	0	0	0	0	0	0
Root; k__Eukaryota; p__Alveolata; c__Ciliophora; o__Intramacronucleata; f__Oligohymenophorea_None10557	0	0	0	0	0	0	1	0	2	1	3	1	0	0
Root; k__Eukaryota; p__Alveolata; c__Ciliophora; o__Intramacronucleata; f__Oligohymenophorea_None1056	0	0	0	0	0	0	0	0	0	0	0	0	0	1
Root; k__Eukaryota; p__Alveolata; c__Ciliophora; o__Intramacronucleata; f__Oligohymenophorea_None10662	0	0	0	0	0	0	0	0	1	0	0	0	0	5
Root; k__Eukaryota; p__Alveolata; c__Ciliophora; o__Intramacronucleata; f__Oligohymenophorea_None10668	0	1	0	0	0	0	0	0	0	0	0	0	0	6
Root; k__Eukaryota; p__Alveolata; c__Ciliophora; o__Intramacronucleata; f__Oligohymenophorea_None10677	0	0	0	0	0	0	0	0	0	0	0	1	0	0
Root; k__Eukaryota; p__Alveolata; c__Ciliophora; o__Intramacronucleata; f__Oligohymenophorea_None10681	0	0	0	0	0	0	0	0	0	0	0	0	0	8
Root; k__Eukaryota; p__Alveolata; c__Ciliophora; o__Intramacronucleata; f__Oligohymenophorea_None10701	0	0	0	0	0	0	0	0	0	0	0	0	0	9
Root; k__Eukaryota; p__Alveolata; c__Ciliophora; o__Intramacronucleata; f__Oligohymenophorea_None10706	0	0	0	0	0	0	0	0	0	0	0	1	0	0
Root; k__Eukaryota; p__Alveolata; c__Ciliophora; o__Intramacronucleata; f__Oligohymenophorea_None10756	0	0	0	0	0	0	0	0	0	0	0	0	0	23
Root; k__Eukaryota; p__Alveolata; c__Ciliophora; o__Intramacronucleata; f__Oligohymenophorea_None10797	0	0	0	0	0	0	0	0	0	0	0	0	0	2
Root; k__Eukaryota; p__Alveolata; c__Ciliophora; o__Intramacronucleata; f__Oligohymenophorea_None1081	0	0	0	0	0	0	0	0	0	0	0	0	0	15
Root; k__Eukaryota; p__Alveolata; c__Ciliophora; o__Intramacronucleata; f__Oligohymenophorea_None10867	0	0	0	0	0	0	0	0	0	0	0	0	0	31
Root; k__Eukaryota; p__Alveolata; c__Ciliophora; o__Intramacronucleata; f__Oligohymenophorea_None10880	0	1	0	0	0	0	0	0	0	0	0	0	0	1
Root; k__Eukaryota; p__Alveolata; c__Ciliophora; o__Intramacronucleata; f__Oligohymenophorea_None1093	0	0	0	0	0	0	0	0	0	1	0	0	0	0
Root; k__Eukaryota; p__Alveolata; c__Ciliophora; o__Intramacronucleata; f__Oligohymenophorea_None10943	0	0	0	0	0	0	0	0	0	0	1	0	0	0
Root; k__Eukaryota; p__Alveolata; c__Ciliophora; o__Intramacronucleata; f__Oligohymenophorea_None10944	0	0	0	0	0	0	0	10	3	0	0	0	0	2
Root; k__Eukaryota; p__Alveolata; c__Ciliophora; o__Intramacronucleata; f__Oligohymenophorea_None10947	0	0	0	0	0	0	1	0	1	0	15	0	0	0
Root; k__Eukaryota; p__Alveolata; c__Ciliophora; o__Intramacronucleata; f__Oligohymenophorea_None10986	0	0	0	0	0	2	0	10	17	2	0	0	0	0
Root; k__Eukaryota; p__Alveolata; c__Ciliophora; o__Intramacronucleata; f__Oligohymenophorea_None10999	0	0	0	0	0	0	0	0	0	0	0	0	0	7
Root; k__Eukaryota; p__Alveolata; c__Ciliophora; o__Intramacronucleata; f__Oligohymenophorea_None11010	0	0	0	0	0	0	0	0	0	0	0	3	0	1
Root; k__Eukaryota; p__Alveolata; c__Ciliophora; o__Intramacronucleata; f__Oligohymenophorea_None1105	0	0	0	0	0	0	0	0	0	1	0	0	0	0
Root; k__Eukaryota; p__Alveolata; c__Ciliophora; o__Intramacronucleata; f__Oligohymenophorea_None11068	0	0	0	0	0	0	0	0	27	0	0	1	0	0
Root; k__Eukaryota; p__Alveolata; c__Ciliophora; o__Intramacronucleata; f__Oligohymenophorea_None11092	0	0	0	0	0	0	0	0	0	0	0	0	0	4
Root; k__Eukaryota; p__Alveolata; c__Ciliophora; o__Intramacronucleata; f__Oligohymenophorea_None11106	0	0	0	0	0	0	5	0	0	0	0	0	0	0
Root; k__Eukaryota; p__Alveolata; c__Ciliophora; o__Intramacronucleata; f__Oligohymenophorea_None11185	0	0	0	0	0	0	0	0	0	1	0	0	0	0
Root; k__Eukaryota; p__Alveolata; c__Ciliophora; o__Intramacronucleata; f__Oligohymenophorea_None11217	0	0	0	0	0	0	1	0	0	1	8	5	0	0
Root; k__Eukaryota; p__Alveolata; c__Ciliophora; o__Intramacronucleata; f__Oligohymenophorea_None11245	0	0	0	0	0	0	0	0	1	0	0	0	0	0
Root; k__Eukaryota; p__Alveolata; c__Ciliophora; o__Intramacronucleata; f__Oligohymenophorea_None11274	0	0	0	0	0	0	0	0	0	0	1	0	0	0
Root; k__Eukaryota; p__Alveolata; c__Ciliophora; o__Intramacronucleata; f__Oligohymenophorea_None11284	0	0	0	0	0	0	0	0	0	0	0	0	0	2
Root; k__Eukaryota; p__Alveolata; c__Ciliophora; o__Intramacronucleata; f__Oligohymenophorea_None11370	0	0	0	0	0	0	0	0	0	0	0	0	0	1
Root; k__Eukaryota; p__Alveolata; c__Ciliophora; o__Intramacronucleata; f__Oligohymenophorea_None11386	0	0	0	0	0	0	2	8	1	2	23	20	0	0
Root; k__Eukaryota; p__Alveolata; c__Ciliophora; o__Intramacronucleata; f__Oligohymenophorea_None11402	0	0	0	0	0	0	0	0	0	0	0	0	0	78
Root; k__Eukaryota; p__Alveolata; c__Ciliophora; o__Intramacronucleata; f__Oligohymenophorea_None11403	0	0	0	0	0	0	0	0	0	0	0	0	0	6
Root; k__Eukaryota; p__Alveolata; c__Ciliophora; o__Intramacronucleata; f__Oligohymenophorea_None11421	0	0	1	0	0	0	0	0	0	1	1	4	0	0
Root; k__Eukaryota; p__Alveolata; c__Ciliophora; o__Intramacronucleata; f__Oligohymenophorea_None11436	0	0	0	0	0	0	0	0	0	0	0	0	0	3
Root; k__Eukaryota; p__Alveolata; c__Ciliophora; o__Intramacronucleata; f__Oligohymenophorea_None1147	0	0	0	0	0	0	0	1	0	0	0	0	0	0
Root; k__Eukaryota; p__Alveolata; c__Ciliophora; o__Intramacronucleata; f__Oligohymenophorea_None11478	0	0	0	0	0	0	0	0	0	0	0	0	0	5
Root; k__Eukaryota; p__Alveolata; c__Ciliophora; o__Intramacronucleata; f__Oligohymenophorea_None1148	0	0	0	0	0	0	0	0	1	0	0	0	0	1
Root; k__Eukaryota; p__Alveolata; c__Ciliophora; o__Intramacronucleata; f__Oligohymenophorea_None11487	0	0	0	0	0	0	3	2	1	1	12	1	0	0
Root; k__Eukaryota; p__Alveolata; c__Ciliophora; o__Intramacronucleata; f__Oligohymenophorea_None11583	0	0	0	0	0	0	0	0	0	1	6	4	0	0
Root; k__Eukaryota; p__Alveolata; c__Ciliophora; o__Intramacronucleata; f__Oligohymenophorea_None11594	0	0	0	0	0	0	0	0	4	0	0	0	0	0
Root; k__Eukaryota; p__Alveolata; c__Ciliophora; o__Intramacronucleata; f__Oligohymenophorea_None11595	0	0	0	0	0	0	1	0	1	0	1	0	0	0
Root; k__Eukaryota; p__Alveolata; c__Ciliophora; o__Intramacronucleata; f__Oligohymenophorea_None11599	0	0	0	0	0	0	0	0	0	4	0	0	0	0
Root; k__Eukaryota; p__Alveolata; c__Ciliophora; o__Intramacronucleata; f__Oligohymenophorea_None11612	0	0	3	0	2	9	3	1	1	0	0	0	0	172
Root; k__Eukaryota; p__Alveolata; c__Ciliophora; o__Intramacronucleata; f__Oligohymenophorea_None1162	0	0	0	0	0	0	0	24	3	0	0	0	0	2
Root; k__Eukaryota; p__Alveolata; c__Ciliophora; o__Intramacronucleata; f__Oligohymenophorea_None1167	0	0	0	0	1	0	0	0	0	0	0	0	0	0
Root; k__Eukaryota; p__Alveolata; c__Ciliophora; o__Intramacronucleata; f__Oligohymenophorea_None11679	0	0	0	0	0	0	0	1	0	0	0	0	0	2
Root; k__Eukaryota; p__Alveolata; c__Ciliophora; o__Intramacronucleata; f__Oligohymenophorea_None11704	0	0	0	0	0	0	0	0	0	0	0	0	0	3
Root; k__Eukaryota; p__Alveolata; c__Ciliophora; o__Intramacronucleata; f__Oligohymenophorea_None1173	0	0	0	0	0	0	0	0	0	0	0	0	0	1
Root; k__Eukaryota; p__Alveolata; c__Ciliophora; o__Intramacronucleata; f__Oligohymenophorea_None11733	0	0	0	0	0	0	0	0	0	0	5	0	0	0
Root; k__Eukaryota; p__Alveolata; c__Ciliophora; o__Intramacronucleata; f__Oligohymenophorea_None11763	0	0	0	0	0	0	1	0	1	1	11	3	0	0
Root; k__Eukaryota; p__Alveolata; c__Ciliophora; o__Intramacronucleata; f__Oligohymenophorea_None11790	0	0	0	0	0	0	0	0	0	0	0	0	0	7
Root; k__Eukaryota; p__Alveolata; c__Ciliophora; o__Intramacronucleata; f__Oligohymenophorea_None1180	0	0	0	0	0	0	0	0	0	4	5	1	0	0
Root; k__Eukaryota; p__Alveolata; c__Ciliophora; o__Intramacronucleata; f__Oligohymenophorea_None11878	0	0	0	0	0	0	0	0	0	0	0	1	0	0
Root; k__Eukaryota; p__Alveolata; c__Ciliophora; o__Intramacronucleata; f__Oligohymenophorea_None11887	0	0	0	0	0	0	0	0	0	0	0	2	0	0
Root; k__Eukaryota; p__Alveolata; c__Ciliophora; o__Intramacronucleata; f__Oligohymenophorea_None11910	0	0	0	0	0	0	0	4	0	0	0	0	0	0
Root; k__Eukaryota; p__Alveolata; c__Ciliophora; o__Intramacronucleata; f__Oligohymenophorea_None11918	0	0	0	0	0	0	0	3	0	0	0	0	0	0
Root; k__Eukaryota; p__Alveolata; c__Ciliophora; o__Intramacronucleata; f__Oligohymenophorea_None11938	0	0	0	0	0	0	0	0	0	0	7	0	0	0
Root; k__Eukaryota; p__Alveolata; c__Ciliophora; o__Intramacronucleata; f__Oligohymenophorea_None11953	0	0	0	0	0	0	0	3	0	0	0	0	0	0
Root; k__Eukaryota; p__Alveolata; c__Ciliophora; o__Intramacronucleata; f__Oligohymenophorea_None1198	0	0	0	0	0	0	0	13	3	1	0	3	0	4
Root; k__Eukaryota; p__Alveolata; c__Ciliophora; o__Intramacronucleata; f__Oligohymenophorea_None1221	0	0	0	0	0	0	0	0	0	0	0	0	0	3
Root; k__Eukaryota; p__Alveolata; c__Ciliophora; o__Intramacronucleata; f__Oligohymenophorea_None1293	0	0	0	0	0	0	0	2	0	0	0	0	0	0
Root; k__Eukaryota; p__Alveolata; c__Ciliophora; o__Intramacronucleata; f__Oligohymenophorea_None1304	0	0	0	0	0	0	0	0	1	0	0	0	0	0
Root; k__Eukaryota; p__Alveolata; c__Ciliophora; o__Intramacronucleata; f__Oligohymenophorea_None1414	0	0	0	0	0	0	1	0	0	0	0	0	0	0
Root; k__Eukaryota; p__Alveolata; c__Ciliophora; o__Intramacronucleata; f__Oligohymenophorea_None1486	0	0	0	0	0	0	0	0	0	0	2	0	0	0
Root; k__Eukaryota; p__Alveolata; c__Ciliophora; o__Intramacronucleata; f__Oligohymenophorea_None1492	0	0	0	0	1	0	0	0	0	0	0	0	0	0
Root; k__Eukaryota; p__Alveolata; c__Ciliophora; o__Intramacronucleata; f__Oligohymenophorea_None1497	0	0	0	0	0	0	1	2	0	1	1	0	0	0
Root; k__Eukaryota; p__Alveolata; c__Ciliophora; o__Intramacronucleata; f__Oligohymenophorea_None1528	0	0	0	0	0	0	0	0	0	0	0	0	0	2
Root; k__Eukaryota; p__Alveolata; c__Ciliophora; o__Intramacronucleata; f__Oligohymenophorea_None153	0	0	1	0	0	21	0	6	0	0	0	0	0	1
Root; k__Eukaryota; p__Alveolata; c__Ciliophora; o__Intramacronucleata; f__Oligohymenophorea_None1554	0	0	0	0	0	0	0	0	0	0	0	2	0	0
Root; k__Eukaryota; p__Alveolata; c__Ciliophora; o__Intramacronucleata; f__Oligohymenophorea_None1603	0	0	0	0	0	0	0	0	0	0	2	0	0	0
Root; k__Eukaryota; p__Alveolata; c__Ciliophora; o__Intramacronucleata; f__Oligohymenophorea_None1619	0	0	0	0	0	0	0	4	0	0	0	0	0	0
Root; k__Eukaryota; p__Alveolata; c__Ciliophora; o__Intramacronucleata; f__Oligohymenophorea_None1630	0	0	0	0	0	0	0	0	0	0	0	0	0	3
Root; k__Eukaryota; p__Alveolata; c__Ciliophora; o__Intramacronucleata; f__Oligohymenophorea_None1745	0	0	0	0	0	0	0	0	0	0	1	0	0	0
Root; k__Eukaryota; p__Alveolata; c__Ciliophora; o__Intramacronucleata; f__Oligohymenophorea_None1828	0	0	0	0	0	0	0	5	0	0	0	0	0	0
Root; k__Eukaryota; p__Alveolata; c__Ciliophora; o__Intramacronucleata; f__Oligohymenophorea_None1857	0	0	0	0	0	0	0	0	0	0	0	0	0	7
Root; k__Eukaryota; p__Alveolata; c__Ciliophora; o__Intramacronucleata; f__Oligohymenophorea_None1902	0	0	0	0	0	0	0	0	0	0	0	0	0	2
Root; k__Eukaryota; p__Alveolata; c__Ciliophora; o__Intramacronucleata; f__Oligohymenophorea_None1904	0	1	0	0	0	17	0	0	0	0	2	0	0	0
Root; k__Eukaryota; p__Alveolata; c__Ciliophora; o__Intramacronucleata; f__Oligohymenophorea_None1938	0	0	0	0	0	0	0	0	0	0	0	2	0	58
Root; k__Eukaryota; p__Alveolata; c__Ciliophora; o__Intramacronucleata; f__Oligohymenophorea_None1947	0	0	0	0	0	0	0	0	0	0	1	0	0	0
Root; k__Eukaryota; p__Alveolata; c__Ciliophora; o__Intramacronucleata; f__Oligohymenophorea_None1974	0	0	0	0	0	1	0	1	0	0	0	0	0	3
Root; k__Eukaryota; p__Alveolata; c__Ciliophora; o__Intramacronucleata; f__Oligohymenophorea_None1984	0	0	0	0	0	0	0	0	0	0	0	0	0	7
Root; k__Eukaryota; p__Alveolata; c__Ciliophora; o__Intramacronucleata; f__Oligohymenophorea_None2032	0	0	0	0	0	0	0	0	0	0	0	0	0	2
Root; k__Eukaryota; p__Alveolata; c__Ciliophora; o__Intramacronucleata; f__Oligohymenophorea_None2055	0	0	0	0	0	0	0	0	0	0	0	0	0	1
Root; k__Eukaryota; p__Alveolata; c__Ciliophora; o__Intramacronucleata; f__Oligohymenophorea_None2074	0	0	0	0	0	0	0	5	0	0	0	0	0	0
Root; k__Eukaryota; p__Alveolata; c__Ciliophora; o__Intramacronucleata; f__Oligohymenophorea_None2109	0	0	0	0	0	0	0	0	0	0	0	1	0	0
Root; k__Eukaryota; p__Alveolata; c__Ciliophora; o__Intramacronucleata; f__Oligohymenophorea_None2195	0	0	0	0	0	0	0	0	0	0	0	0	0	37
Root; k__Eukaryota; p__Alveolata; c__Ciliophora; o__Intramacronucleata; f__Oligohymenophorea_None2219	0	0	0	0	0	0	0	1	0	0	0	0	0	0
Root; k__Eukaryota; p__Alveolata; c__Ciliophora; o__Intramacronucleata; f__Oligohymenophorea_None2236	0	0	0	0	0	0	0	0	1	0	0	0	0	0
Root; k__Eukaryota; p__Alveolata; c__Ciliophora; o__Intramacronucleata; f__Oligohymenophorea_None2252	0	0	0	0	0	0	0	0	0	0	7	1	0	12
Root; k__Eukaryota; p__Alveolata; c__Ciliophora; o__Intramacronucleata; f__Oligohymenophorea_None2296	0	0	0	0	0	0	0	0	0	0	0	0	0	10
Root; k__Eukaryota; p__Alveolata; c__Ciliophora; o__Intramacronucleata; f__Oligohymenophorea_None2363	0	0	0	0	0	0	0	0	1	0	0	0	0	0
Root; k__Eukaryota; p__Alveolata; c__Ciliophora; o__Intramacronucleata; f__Oligohymenophorea_None2383	0	0	0	0	0	0	0	0	0	0	1	0	0	0
Root; k__Eukaryota; p__Alveolata; c__Ciliophora; o__Intramacronucleata; f__Oligohymenophorea_None2453	0	0	0	0	0	0	0	3	0	0	0	0	0	0
Root; k__Eukaryota; p__Alveolata; c__Ciliophora; o__Intramacronucleata; f__Oligohymenophorea_None2461	0	0	0	0	0	0	0	1	0	0	0	0	0	0
Root; k__Eukaryota; p__Alveolata; c__Ciliophora; o__Intramacronucleata; f__Oligohymenophorea_None2502	0	0	0	0	0	0	0	0	0	0	0	0	0	27
Root; k__Eukaryota; p__Alveolata; c__Ciliophora; o__Intramacronucleata; f__Oligohymenophorea_None2527	0	0	0	0	0	0	0	0	0	0	0	0	0	9
Root; k__Eukaryota; p__Alveolata; c__Ciliophora; o__Intramacronucleata; f__Oligohymenophorea_None2554	0	0	0	0	0	0	0	0	0	0	0	0	0	2
Root; k__Eukaryota; p__Alveolata; c__Ciliophora; o__Intramacronucleata; f__Oligohymenophorea_None2562	0	0	0	0	0	0	0	0	0	0	0	0	0	1
Root; k__Eukaryota; p__Alveolata; c__Ciliophora; o__Intramacronucleata; f__Oligohymenophorea_None2564	0	0	0	0	1	0	0	0	8	10	0	1	2	2
Root; k__Eukaryota; p__Alveolata; c__Ciliophora; o__Intramacronucleata; f__Oligohymenophorea_None2639	0	0	0	0	0	0	0	0	0	0	0	0	0	6
Root; k__Eukaryota; p__Alveolata; c__Ciliophora; o__Intramacronucleata; f__Oligohymenophorea_None2661	0	0	0	0	0	0	0	0	0	0	0	0	0	19
Root; k__Eukaryota; p__Alveolata; c__Ciliophora; o__Intramacronucleata; f__Oligohymenophorea_None2679	0	0	0	0	0	0	0	0	0	0	5	0	0	0
Root; k__Eukaryota; p__Alveolata; c__Ciliophora; o__Intramacronucleata; f__Oligohymenophorea_None270	0	0	0	0	0	0	0	0	0	0	0	0	0	2
Root; k__Eukaryota; p__Alveolata; c__Ciliophora; o__Intramacronucleata; f__Oligohymenophorea_None2705	0	0	0	0	0	0	0	0	0	1	1	0	0	0
Root; k__Eukaryota; p__Alveolata; c__Ciliophora; o__Intramacronucleata; f__Oligohymenophorea_None2762	0	0	0	0	0	0	0	5	4	0	0	0	0	0
Root; k__Eukaryota; p__Alveolata; c__Ciliophora; o__Intramacronucleata; f__Oligohymenophorea_None2769	0	0	0	0	0	0	0	0	0	0	0	0	0	2
Root; k__Eukaryota; p__Alveolata; c__Ciliophora; o__Intramacronucleata; f__Oligohymenophorea_None2811	0	0	0	0	0	0	1	0	0	0	12	0	0	0
Root; k__Eukaryota; p__Alveolata; c__Ciliophora; o__Intramacronucleata; f__Oligohymenophorea_None2895	0	0	0	0	0	0	6	0	0	0	0	0	0	0
Root; k__Eukaryota; p__Alveolata; c__Ciliophora; o__Intramacronucleata; f__Oligohymenophorea_None2909	0	0	0	0	0	0	0	1	2	0	3	0	0	0
Root; k__Eukaryota; p__Alveolata; c__Ciliophora; o__Intramacronucleata; f__Oligohymenophorea_None2951	0	0	0	0	0	0	0	0	0	0	0	1	0	5
Root; k__Eukaryota; p__Alveolata; c__Ciliophora; o__Intramacronucleata; f__Oligohymenophorea_None2999	0	0	0	0	0	0	0	0	0	0	0	0	0	7
Root; k__Eukaryota; p__Alveolata; c__Ciliophora; o__Intramacronucleata; f__Oligohymenophorea_None3111	0	0	0	0	0	0	0	1	0	0	0	0	0	0
Root; k__Eukaryota; p__Alveolata; c__Ciliophora; o__Intramacronucleata; f__Oligohymenophorea_None3115	0	0	0	0	0	0	0	2	0	0	0	0	0	19
Root; k__Eukaryota; p__Alveolata; c__Ciliophora; o__Intramacronucleata; f__Oligohymenophorea_None3123	0	0	0	0	0	0	0	0	0	0	8	1	0	0
Root; k__Eukaryota; p__Alveolata; c__Ciliophora; o__Intramacronucleata; f__Oligohymenophorea_None3124	0	0	0	0	0	0	0	0	0	0	0	0	0	1
Root; k__Eukaryota; p__Alveolata; c__Ciliophora; o__Intramacronucleata; f__Oligohymenophorea_None3142	0	0	1	1	0	0	0	1	0	7	0	3	0	155
Root; k__Eukaryota; p__Alveolata; c__Ciliophora; o__Intramacronucleata; f__Oligohymenophorea_None3155	0	0	0	0	0	0	0	0	14	0	0	0	0	0
Root; k__Eukaryota; p__Alveolata; c__Ciliophora; o__Intramacronucleata; f__Oligohymenophorea_None3163	0	0	0	0	0	0	0	0	0	0	2	0	0	0
Root; k__Eukaryota; p__Alveolata; c__Ciliophora; o__Intramacronucleata; f__Oligohymenophorea_None323	0	0	0	0	0	0	0	0	0	0	3	0	0	0
Root; k__Eukaryota; p__Alveolata; c__Ciliophora; o__Intramacronucleata; f__Oligohymenophorea_None3282	0	0	0	0	0	0	0	0	0	0	0	0	0	5
Root; k__Eukaryota; p__Alveolata; c__Ciliophora; o__Intramacronucleata; f__Oligohymenophorea_None3293	0	0	0	0	0	0	0	0	0	0	0	0	0	8
Root; k__Eukaryota; p__Alveolata; c__Ciliophora; o__Intramacronucleata; f__Oligohymenophorea_None3377	0	0	0	0	0	0	0	0	0	0	0	0	0	5
Root; k__Eukaryota; p__Alveolata; c__Ciliophora; o__Intramacronucleata; f__Oligohymenophorea_None3379	0	0	0	0	0	0	0	0	0	1	6	0	0	0
Root; k__Eukaryota; p__Alveolata; c__Ciliophora; o__Intramacronucleata; f__Oligohymenophorea_None3418	0	0	0	0	0	0	0	0	0	0	0	0	0	4
Root; k__Eukaryota; p__Alveolata; c__Ciliophora; o__Intramacronucleata; f__Oligohymenophorea_None3419	0	0	0	0	0	0	0	0	0	0	0	0	0	4
Root; k__Eukaryota; p__Alveolata; c__Ciliophora; o__Intramacronucleata; f__Oligohymenophorea_None3469	0	0	0	0	0	0	0	0	0	0	0	0	0	1
Root; k__Eukaryota; p__Alveolata; c__Ciliophora; o__Intramacronucleata; f__Oligohymenophorea_None3492	0	0	0	0	0	0	0	0	0	0	0	0	0	4
Root; k__Eukaryota; p__Alveolata; c__Ciliophora; o__Intramacronucleata; f__Oligohymenophorea_None3493	0	0	0	0	0	0	0	0	0	0	0	0	0	13
Root; k__Eukaryota; p__Alveolata; c__Ciliophora; o__Intramacronucleata; f__Oligohymenophorea_None3497	0	0	0	0	0	0	0	8	1	0	0	0	0	0
Root; k__Eukaryota; p__Alveolata; c__Ciliophora; o__Intramacronucleata; f__Oligohymenophorea_None351	0	0	0	0	0	0	0	0	0	0	0	1	0	48
Root; k__Eukaryota; p__Alveolata; c__Ciliophora; o__Intramacronucleata; f__Oligohymenophorea_None3524	0	0	0	0	0	0	0	1	0	0	0	0	0	0
Root; k__Eukaryota; p__Alveolata; c__Ciliophora; o__Intramacronucleata; f__Oligohymenophorea_None3539	0	0	0	0	0	0	0	0	2	0	0	0	0	14
Root; k__Eukaryota; p__Alveolata; c__Ciliophora; o__Intramacronucleata; f__Oligohymenophorea_None3548	0	0	0	0	0	3	0	0	1	0	0	0	0	9
Root; k__Eukaryota; p__Alveolata; c__Ciliophora; o__Intramacronucleata; f__Oligohymenophorea_None3554	0	0	0	0	0	0	0	0	0	0	0	0	0	351
Root; k__Eukaryota; p__Alveolata; c__Ciliophora; o__Intramacronucleata; f__Oligohymenophorea_None3607	0	0	0	0	0	0	0	0	0	0	2	2	0	0
Root; k__Eukaryota; p__Alveolata; c__Ciliophora; o__Intramacronucleata; f__Oligohymenophorea_None362	0	0	0	0	0	0	0	1	0	0	0	0	0	0
Root; k__Eukaryota; p__Alveolata; c__Ciliophora; o__Intramacronucleata; f__Oligohymenophorea_None3646	0	0	0	0	0	0	0	0	0	0	0	0	0	3
Root; k__Eukaryota; p__Alveolata; c__Ciliophora; o__Intramacronucleata; f__Oligohymenophorea_None3649	0	0	0	0	0	0	1	1	0	1	2	0	0	0
Root; k__Eukaryota; p__Alveolata; c__Ciliophora; o__Intramacronucleata; f__Oligohymenophorea_None3652	0	0	0	0	0	0	0	0	0	0	2	0	0	0
Root; k__Eukaryota; p__Alveolata; c__Ciliophora; o__Intramacronucleata; f__Oligohymenophorea_None3662	0	0	0	0	0	0	0	2	2	0	0	0	0	0
Root; k__Eukaryota; p__Alveolata; c__Ciliophora; o__Intramacronucleata; f__Oligohymenophorea_None37	0	0	0	0	0	0	0	0	0	0	0	0	0	13
Root; k__Eukaryota; p__Alveolata; c__Ciliophora; o__Intramacronucleata; f__Oligohymenophorea_None373	0	1	0	0	0	0	0	0	0	1	0	1	0	0
Root; k__Eukaryota; p__Alveolata; c__Ciliophora; o__Intramacronucleata; f__Oligohymenophorea_None375	0	0	0	1	0	0	1	1	0	0	0	3	0	5
Root; k__Eukaryota; p__Alveolata; c__Ciliophora; o__Intramacronucleata; f__Oligohymenophorea_None3810	0	0	0	0	0	0	0	0	0	0	4	0	0	0
Root; k__Eukaryota; p__Alveolata; c__Ciliophora; o__Intramacronucleata; f__Oligohymenophorea_None383	0	0	0	0	0	0	1	0	0	0	0	0	0	0
Root; k__Eukaryota; p__Alveolata; c__Ciliophora; o__Intramacronucleata; f__Oligohymenophorea_None3832	0	0	0	0	0	0	0	0	0	0	2	0	0	0
Root; k__Eukaryota; p__Alveolata; c__Ciliophora; o__Intramacronucleata; f__Oligohymenophorea_None3835	0	0	0	0	0	0	0	0	0	0	0	0	0	1
Root; k__Eukaryota; p__Alveolata; c__Ciliophora; o__Intramacronucleata; f__Oligohymenophorea_None384	0	0	0	0	0	0	0	2	0	3	0	1	0	0
Root; k__Eukaryota; p__Alveolata; c__Ciliophora; o__Intramacronucleata; f__Oligohymenophorea_None3841	0	0	0	0	0	0	0	0	0	0	0	0	0	6
Root; k__Eukaryota; p__Alveolata; c__Ciliophora; o__Intramacronucleata; f__Oligohymenophorea_None3855	0	0	0	0	0	0	0	0	0	0	0	0	0	3
Root; k__Eukaryota; p__Alveolata; c__Ciliophora; o__Intramacronucleata; f__Oligohymenophorea_None3918	0	0	0	0	0	0	0	0	0	0	0	0	0	2
Root; k__Eukaryota; p__Alveolata; c__Ciliophora; o__Intramacronucleata; f__Oligohymenophorea_None3931	0	0	0	0	0	0	0	0	1	0	1	0	0	0
Root; k__Eukaryota; p__Alveolata; c__Ciliophora; o__Intramacronucleata; f__Oligohymenophorea_None394	0	0	0	0	0	0	0	0	0	0	0	0	0	2
Root; k__Eukaryota; p__Alveolata; c__Ciliophora; o__Intramacronucleata; f__Oligohymenophorea_None3940	0	0	0	0	0	0	0	0	0	0	1	0	0	0
Root; k__Eukaryota; p__Alveolata; c__Ciliophora; o__Intramacronucleata; f__Oligohymenophorea_None397	0	0	0	0	0	0	0	0	0	0	0	0	0	7
Root; k__Eukaryota; p__Alveolata; c__Ciliophora; o__Intramacronucleata; f__Oligohymenophorea_None3982	0	0	0	0	0	0	0	0	0	0	1	0	0	0
Root; k__Eukaryota; p__Alveolata; c__Ciliophora; o__Intramacronucleata; f__Oligohymenophorea_None3998	0	0	0	2	0	3	0	1	1	0	0	2	0	1
Root; k__Eukaryota; p__Alveolata; c__Ciliophora; o__Intramacronucleata; f__Oligohymenophorea_None4	0	0	0	0	0	0	0	1	0	0	0	0	0	0
Root; k__Eukaryota; p__Alveolata; c__Ciliophora; o__Intramacronucleata; f__Oligohymenophorea_None4003	0	0	0	0	0	0	0	2	2	0	0	0	0	0
Root; k__Eukaryota; p__Alveolata; c__Ciliophora; o__Intramacronucleata; f__Oligohymenophorea_None4018	0	0	0	0	0	0	0	1	0	0	0	0	0	0
Root; k__Eukaryota; p__Alveolata; c__Ciliophora; o__Intramacronucleata; f__Oligohymenophorea_None4041	0	0	0	0	0	0	0	0	5	0	0	0	0	0
Root; k__Eukaryota; p__Alveolata; c__Ciliophora; o__Intramacronucleata; f__Oligohymenophorea_None4075	0	0	0	0	0	0	0	0	1	0	0	0	0	1
Root; k__Eukaryota; p__Alveolata; c__Ciliophora; o__Intramacronucleata; f__Oligohymenophorea_None4085	0	0	0	0	0	0	0	0	1	0	0	0	0	0
Root; k__Eukaryota; p__Alveolata; c__Ciliophora; o__Intramacronucleata; f__Oligohymenophorea_None4113	0	0	0	0	0	0	0	4	0	0	0	0	0	0
Root; k__Eukaryota; p__Alveolata; c__Ciliophora; o__Intramacronucleata; f__Oligohymenophorea_None4121	0	0	1	0	0	0	0	1	0	0	0	0	0	95
Root; k__Eukaryota; p__Alveolata; c__Ciliophora; o__Intramacronucleata; f__Oligohymenophorea_None4125	0	0	0	0	0	0	0	0	5	0	0	0	0	0
Root; k__Eukaryota; p__Alveolata; c__Ciliophora; o__Intramacronucleata; f__Oligohymenophorea_None4138	0	0	0	0	0	0	0	2	1	0	1	0	0	0
Root; k__Eukaryota; p__Alveolata; c__Ciliophora; o__Intramacronucleata; f__Oligohymenophorea_None4169	0	0	0	0	0	0	0	0	0	0	0	0	0	3
Root; k__Eukaryota; p__Alveolata; c__Ciliophora; o__Intramacronucleata; f__Oligohymenophorea_None4170	0	0	0	0	0	0	0	0	0	0	5	2	0	1
Root; k__Eukaryota; p__Alveolata; c__Ciliophora; o__Intramacronucleata; f__Oligohymenophorea_None4180	0	0	0	0	0	0	0	0	0	0	0	0	0	8
Root; k__Eukaryota; p__Alveolata; c__Ciliophora; o__Intramacronucleata; f__Oligohymenophorea_None4185	0	0	0	0	0	0	0	2	1	0	0	0	2	0
Root; k__Eukaryota; p__Alveolata; c__Ciliophora; o__Intramacronucleata; f__Oligohymenophorea_None4199	0	0	1	0	0	0	2	0	0	0	0	0	0	9
Root; k__Eukaryota; p__Alveolata; c__Ciliophora; o__Intramacronucleata; f__Oligohymenophorea_None4208	0	0	0	0	0	0	2	1	0	0	0	0	0	0
Root; k__Eukaryota; p__Alveolata; c__Ciliophora; o__Intramacronucleata; f__Oligohymenophorea_None4213	0	0	0	0	0	0	0	0	0	0	0	0	0	4
Root; k__Eukaryota; p__Alveolata; c__Ciliophora; o__Intramacronucleata; f__Oligohymenophorea_None4245	0	0	0	0	0	0	0	0	0	0	1	0	0	0
Root; k__Eukaryota; p__Alveolata; c__Ciliophora; o__Intramacronucleata; f__Oligohymenophorea_None4304	0	0	0	0	0	0	0	0	0	0	0	1	0	0
Root; k__Eukaryota; p__Alveolata; c__Ciliophora; o__Intramacronucleata; f__Oligohymenophorea_None4313	0	0	0	0	0	0	0	0	0	2	1	1	0	38
Root; k__Eukaryota; p__Alveolata; c__Ciliophora; o__Intramacronucleata; f__Oligohymenophorea_None4334	0	0	0	0	0	0	0	6	1	0	0	0	0	0
Root; k__Eukaryota; p__Alveolata; c__Ciliophora; o__Intramacronucleata; f__Oligohymenophorea_None4343	0	0	0	0	0	0	1	0	0	0	8	0	0	8
Root; k__Eukaryota; p__Alveolata; c__Ciliophora; o__Intramacronucleata; f__Oligohymenophorea_None4349	0	0	0	0	0	0	0	1	1	0	0	2	0	0
Root; k__Eukaryota; p__Alveolata; c__Ciliophora; o__Intramacronucleata; f__Oligohymenophorea_None4352	0	0	0	0	0	0	0	1	0	0	0	0	0	0
Root; k__Eukaryota; p__Alveolata; c__Ciliophora; o__Intramacronucleata; f__Oligohymenophorea_None4356	0	0	0	0	0	0	0	0	0	0	0	0	0	6
Root; k__Eukaryota; p__Alveolata; c__Ciliophora; o__Intramacronucleata; f__Oligohymenophorea_None4378	0	0	0	0	0	0	0	9	0	0	0	0	0	0
Root; k__Eukaryota; p__Alveolata; c__Ciliophora; o__Intramacronucleata; f__Oligohymenophorea_None4402	0	0	0	0	0	0	0	0	0	0	0	0	0	72
Root; k__Eukaryota; p__Alveolata; c__Ciliophora; o__Intramacronucleata; f__Oligohymenophorea_None4419	0	0	0	0	0	0	0	0	0	0	0	0	0	2
Root; k__Eukaryota; p__Alveolata; c__Ciliophora; o__Intramacronucleata; f__Oligohymenophorea_None4438	0	0	0	0	0	0	0	0	0	0	1	0	0	0
Root; k__Eukaryota; p__Alveolata; c__Ciliophora; o__Intramacronucleata; f__Oligohymenophorea_None4451	0	0	0	0	0	0	0	0	3	0	0	0	0	0
Root; k__Eukaryota; p__Alveolata; c__Ciliophora; o__Intramacronucleata; f__Oligohymenophorea_None4462	0	0	0	0	0	0	0	0	0	0	2	1	0	0
Root; k__Eukaryota; p__Alveolata; c__Ciliophora; o__Intramacronucleata; f__Oligohymenophorea_None4466	0	0	0	0	0	0	0	0	0	0	0	0	0	22
Root; k__Eukaryota; p__Alveolata; c__Ciliophora; o__Intramacronucleata; f__Oligohymenophorea_None4515	0	0	0	0	0	0	0	0	0	0	2	0	1	0
Root; k__Eukaryota; p__Alveolata; c__Ciliophora; o__Intramacronucleata; f__Oligohymenophorea_None452	0	0	0	0	0	0	0	0	0	0	0	0	0	64
Root; k__Eukaryota; p__Alveolata; c__Ciliophora; o__Intramacronucleata; f__Oligohymenophorea_None456	0	0	0	0	0	0	0	0	0	0	0	0	0	8
Root; k__Eukaryota; p__Alveolata; c__Ciliophora; o__Intramacronucleata; f__Oligohymenophorea_None458	0	0	0	0	0	0	0	0	0	0	0	0	0	8
Root; k__Eukaryota; p__Alveolata; c__Ciliophora; o__Intramacronucleata; f__Oligohymenophorea_None4584	0	0	0	0	0	0	0	0	0	0	0	0	0	79
Root; k__Eukaryota; p__Alveolata; c__Ciliophora; o__Intramacronucleata; f__Oligohymenophorea_None4592	0	0	0	0	0	0	0	3	0	0	0	0	0	0
Root; k__Eukaryota; p__Alveolata; c__Ciliophora; o__Intramacronucleata; f__Oligohymenophorea_None4610	0	0	0	0	0	0	0	3	0	0	0	0	0	0
Root; k__Eukaryota; p__Alveolata; c__Ciliophora; o__Intramacronucleata; f__Oligohymenophorea_None4611	0	0	0	0	0	0	0	0	0	0	0	0	0	17
Root; k__Eukaryota; p__Alveolata; c__Ciliophora; o__Intramacronucleata; f__Oligohymenophorea_None4623	0	0	0	0	0	0	0	4	0	0	0	21	0	1
Root; k__Eukaryota; p__Alveolata; c__Ciliophora; o__Intramacronucleata; f__Oligohymenophorea_None4702	0	0	0	0	0	0	0	0	0	0	0	0	0	4
Root; k__Eukaryota; p__Alveolata; c__Ciliophora; o__Intramacronucleata; f__Oligohymenophorea_None4748	0	0	0	0	0	0	0	0	0	0	0	1	0	0
Root; k__Eukaryota; p__Alveolata; c__Ciliophora; o__Intramacronucleata; f__Oligohymenophorea_None4790	0	0	0	0	0	0	0	48	17	1	1	0	0	0
Root; k__Eukaryota; p__Alveolata; c__Ciliophora; o__Intramacronucleata; f__Oligohymenophorea_None481	0	0	0	0	0	0	5	2	0	7	15	2	0	0
Root; k__Eukaryota; p__Alveolata; c__Ciliophora; o__Intramacronucleata; f__Oligohymenophorea_None4814	0	0	0	0	0	0	0	9	0	0	0	0	0	0
Root; k__Eukaryota; p__Alveolata; c__Ciliophora; o__Intramacronucleata; f__Oligohymenophorea_None4839	0	0	1	0	0	0	0	0	0	0	0	0	0	0
Root; k__Eukaryota; p__Alveolata; c__Ciliophora; o__Intramacronucleata; f__Oligohymenophorea_None484	0	0	0	0	0	0	0	0	0	0	0	1	0	0
Root; k__Eukaryota; p__Alveolata; c__Ciliophora; o__Intramacronucleata; f__Oligohymenophorea_None4841	0	0	0	0	0	0	1	0	0	0	0	0	0	0
Root; k__Eukaryota; p__Alveolata; c__Ciliophora; o__Intramacronucleata; f__Oligohymenophorea_None4927	0	0	0	0	0	0	0	0	0	0	0	0	0	2
Root; k__Eukaryota; p__Alveolata; c__Ciliophora; o__Intramacronucleata; f__Oligohymenophorea_None4943	0	0	0	0	0	0	0	0	0	0	0	0	0	3
Root; k__Eukaryota; p__Alveolata; c__Ciliophora; o__Intramacronucleata; f__Oligohymenophorea_None4964	0	0	0	0	0	0	0	3	1	0	0	0	0	0
Root; k__Eukaryota; p__Alveolata; c__Ciliophora; o__Intramacronucleata; f__Oligohymenophorea_None4969	0	0	0	0	0	0	0	0	0	1	2	6	0	0
Root; k__Eukaryota; p__Alveolata; c__Ciliophora; o__Intramacronucleata; f__Oligohymenophorea_None5019	0	0	0	0	0	0	0	0	0	0	0	12	0	0
Root; k__Eukaryota; p__Alveolata; c__Ciliophora; o__Intramacronucleata; f__Oligohymenophorea_None5027	0	0	0	0	3	0	1	0	3	0	3	0	0	67
Root; k__Eukaryota; p__Alveolata; c__Ciliophora; o__Intramacronucleata; f__Oligohymenophorea_None5038	0	0	3	2	0	0	0	0	0	0	0	0	0	0
Root; k__Eukaryota; p__Alveolata; c__Ciliophora; o__Intramacronucleata; f__Oligohymenophorea_None5069	0	0	0	0	0	0	0	0	0	0	0	0	0	18
Root; k__Eukaryota; p__Alveolata; c__Ciliophora; o__Intramacronucleata; f__Oligohymenophorea_None5129	0	0	0	0	0	0	0	0	0	0	0	0	0	4
Root; k__Eukaryota; p__Alveolata; c__Ciliophora; o__Intramacronucleata; f__Oligohymenophorea_None5181	0	0	0	0	0	1	0	1	0	5	0	6	0	0
Root; k__Eukaryota; p__Alveolata; c__Ciliophora; o__Intramacronucleata; f__Oligohymenophorea_None5183	0	0	0	0	0	0	0	0	0	0	0	0	0	8
Root; k__Eukaryota; p__Alveolata; c__Ciliophora; o__Intramacronucleata; f__Oligohymenophorea_None5201	0	0	0	0	0	0	0	0	0	0	2	0	0	0
Root; k__Eukaryota; p__Alveolata; c__Ciliophora; o__Intramacronucleata; f__Oligohymenophorea_None5205	0	0	0	0	0	0	0	0	0	0	0	0	0	3
Root; k__Eukaryota; p__Alveolata; c__Ciliophora; o__Intramacronucleata; f__Oligohymenophorea_None5218	0	0	0	0	0	0	0	0	0	0	0	0	0	39
Root; k__Eukaryota; p__Alveolata; c__Ciliophora; o__Intramacronucleata; f__Oligohymenophorea_None5232	0	0	0	0	0	0	0	0	0	0	0	0	0	2
Root; k__Eukaryota; p__Alveolata; c__Ciliophora; o__Intramacronucleata; f__Oligohymenophorea_None524	0	0	0	0	0	0	1	1	1	0	4	0	0	0
Root; k__Eukaryota; p__Alveolata; c__Ciliophora; o__Intramacronucleata; f__Oligohymenophorea_None5251	0	0	0	2	0	0	0	0	0	0	39	47	15	7797
Root; k__Eukaryota; p__Alveolata; c__Ciliophora; o__Intramacronucleata; f__Oligohymenophorea_None5255	0	0	0	0	0	0	1	1	0	0	1	5	0	0
Root; k__Eukaryota; p__Alveolata; c__Ciliophora; o__Intramacronucleata; f__Oligohymenophorea_None5328	0	0	0	0	0	0	0	0	1	0	8	0	0	0
Root; k__Eukaryota; p__Alveolata; c__Ciliophora; o__Intramacronucleata; f__Oligohymenophorea_None5361	0	0	0	0	0	0	0	0	0	0	7	1	0	0
Root; k__Eukaryota; p__Alveolata; c__Ciliophora; o__Intramacronucleata; f__Oligohymenophorea_None5397	0	0	0	0	0	0	0	0	0	0	0	0	0	2
Root; k__Eukaryota; p__Alveolata; c__Ciliophora; o__Intramacronucleata; f__Oligohymenophorea_None5403	0	0	0	0	0	0	0	0	0	0	0	0	0	5
Root; k__Eukaryota; p__Alveolata; c__Ciliophora; o__Intramacronucleata; f__Oligohymenophorea_None5489	0	0	0	0	0	0	0	0	0	0	0	0	0	11
Root; k__Eukaryota; p__Alveolata; c__Ciliophora; o__Intramacronucleata; f__Oligohymenophorea_None5514	0	0	0	0	0	0	0	0	0	0	0	0	0	3
Root; k__Eukaryota; p__Alveolata; c__Ciliophora; o__Intramacronucleata; f__Oligohymenophorea_None5530	0	0	0	0	0	0	0	0	0	0	1	0	0	0
Root; k__Eukaryota; p__Alveolata; c__Ciliophora; o__Intramacronucleata; f__Oligohymenophorea_None5588	0	0	0	0	0	0	0	0	0	0	0	4	0	8
Root; k__Eukaryota; p__Alveolata; c__Ciliophora; o__Intramacronucleata; f__Oligohymenophorea_None5598	0	0	0	0	0	0	0	0	0	1	32	1	0	0
Root; k__Eukaryota; p__Alveolata; c__Ciliophora; o__Intramacronucleata; f__Oligohymenophorea_None5625	0	0	0	0	0	0	0	0	2	0	0	0	0	0
Root; k__Eukaryota; p__Alveolata; c__Ciliophora; o__Intramacronucleata; f__Oligohymenophorea_None5633	0	0	0	0	0	0	0	39	10	1	0	0	0	2
Root; k__Eukaryota; p__Alveolata; c__Ciliophora; o__Intramacronucleata; f__Oligohymenophorea_None5652	0	0	0	0	0	0	0	0	0	0	12	0	0	0
Root; k__Eukaryota; p__Alveolata; c__Ciliophora; o__Intramacronucleata; f__Oligohymenophorea_None5659	0	0	0	0	0	0	0	0	0	0	0	0	0	10
Root; k__Eukaryota; p__Alveolata; c__Ciliophora; o__Intramacronucleata; f__Oligohymenophorea_None5662	0	0	0	0	0	0	0	0	0	0	0	0	0	17
Root; k__Eukaryota; p__Alveolata; c__Ciliophora; o__Intramacronucleata; f__Oligohymenophorea_None5667	0	0	0	0	0	0	1	2	1	0	2	5	0	0
Root; k__Eukaryota; p__Alveolata; c__Ciliophora; o__Intramacronucleata; f__Oligohymenophorea_None5682	0	0	0	0	0	0	0	0	0	0	1	0	0	0
Root; k__Eukaryota; p__Alveolata; c__Ciliophora; o__Intramacronucleata; f__Oligohymenophorea_None5693	0	0	0	0	0	0	0	0	0	0	0	0	0	2
Root; k__Eukaryota; p__Alveolata; c__Ciliophora; o__Intramacronucleata; f__Oligohymenophorea_None5699	0	0	0	0	0	0	0	0	0	0	0	0	0	16
Root; k__Eukaryota; p__Alveolata; c__Ciliophora; o__Intramacronucleata; f__Oligohymenophorea_None570	0	0	0	0	0	0	0	0	0	0	0	0	0	12
Root; k__Eukaryota; p__Alveolata; c__Ciliophora; o__Intramacronucleata; f__Oligohymenophorea_None5723	0	0	0	0	0	1	0	0	0	0	0	0	0	0
Root; k__Eukaryota; p__Alveolata; c__Ciliophora; o__Intramacronucleata; f__Oligohymenophorea_None575	0	0	0	0	0	0	0	0	0	0	0	0	0	48
Root; k__Eukaryota; p__Alveolata; c__Ciliophora; o__Intramacronucleata; f__Oligohymenophorea_None5784	0	0	0	0	0	0	0	2	1	0	0	0	0	0
Root; k__Eukaryota; p__Alveolata; c__Ciliophora; o__Intramacronucleata; f__Oligohymenophorea_None581	0	0	0	0	0	0	0	0	2	0	0	0	0	0
Root; k__Eukaryota; p__Alveolata; c__Ciliophora; o__Intramacronucleata; f__Oligohymenophorea_None5830	0	0	0	0	0	0	3	0	0	0	0	0	0	0
Root; k__Eukaryota; p__Alveolata; c__Ciliophora; o__Intramacronucleata; f__Oligohymenophorea_None5839	0	0	0	0	0	2	0	0	0	0	0	0	0	0
Root; k__Eukaryota; p__Alveolata; c__Ciliophora; o__Intramacronucleata; f__Oligohymenophorea_None584	0	0	0	0	0	0	0	1	0	0	1	2	0	0
Root; k__Eukaryota; p__Alveolata; c__Ciliophora; o__Intramacronucleata; f__Oligohymenophorea_None585	0	0	0	0	0	0	1	0	1	0	3	0	0	0
Root; k__Eukaryota; p__Alveolata; c__Ciliophora; o__Intramacronucleata; f__Oligohymenophorea_None5905	0	0	0	1	0	3	0	0	1	0	2	2	0	1
Root; k__Eukaryota; p__Alveolata; c__Ciliophora; o__Intramacronucleata; f__Oligohymenophorea_None5911	0	0	0	0	0	0	0	2	0	0	4	1	0	0
Root; k__Eukaryota; p__Alveolata; c__Ciliophora; o__Intramacronucleata; f__Oligohymenophorea_None5918	0	0	0	0	0	0	1	0	1	0	0	0	0	0
Root; k__Eukaryota; p__Alveolata; c__Ciliophora; o__Intramacronucleata; f__Oligohymenophorea_None5941	0	0	0	0	0	0	0	0	0	2	0	0	0	4
Root; k__Eukaryota; p__Alveolata; c__Ciliophora; o__Intramacronucleata; f__Oligohymenophorea_None6	0	0	0	0	0	0	0	0	0	0	0	0	0	3
Root; k__Eukaryota; p__Alveolata; c__Ciliophora; o__Intramacronucleata; f__Oligohymenophorea_None6002	0	0	0	0	0	0	0	1	0	0	0	0	0	0
Root; k__Eukaryota; p__Alveolata; c__Ciliophora; o__Intramacronucleata; f__Oligohymenophorea_None6012	0	0	0	0	0	0	0	0	0	0	1	0	0	2
Root; k__Eukaryota; p__Alveolata; c__Ciliophora; o__Intramacronucleata; f__Oligohymenophorea_None6027	0	0	0	0	0	0	0	0	0	0	0	0	0	2
Root; k__Eukaryota; p__Alveolata; c__Ciliophora; o__Intramacronucleata; f__Oligohymenophorea_None6060	0	0	0	0	0	0	0	0	0	0	0	0	0	2
Root; k__Eukaryota; p__Alveolata; c__Ciliophora; o__Intramacronucleata; f__Oligohymenophorea_None6086	0	0	0	0	0	0	0	0	0	0	0	0	0	43
Root; k__Eukaryota; p__Alveolata; c__Ciliophora; o__Intramacronucleata; f__Oligohymenophorea_None61	0	0	0	0	0	0	0	0	0	0	1	1	0	0
Root; k__Eukaryota; p__Alveolata; c__Ciliophora; o__Intramacronucleata; f__Oligohymenophorea_None6130	0	0	0	0	0	0	0	0	0	0	10	24	0	1
Root; k__Eukaryota; p__Alveolata; c__Ciliophora; o__Intramacronucleata; f__Oligohymenophorea_None6158	0	0	5	0	0	0	108	121	60	167	653	157	0	0
Root; k__Eukaryota; p__Alveolata; c__Ciliophora; o__Intramacronucleata; f__Oligohymenophorea_None6180	0	0	0	0	0	0	1	0	0	0	0	1	0	0
Root; k__Eukaryota; p__Alveolata; c__Ciliophora; o__Intramacronucleata; f__Oligohymenophorea_None6222	0	0	0	0	0	0	0	0	0	0	0	0	0	5
Root; k__Eukaryota; p__Alveolata; c__Ciliophora; o__Intramacronucleata; f__Oligohymenophorea_None6226	0	0	0	0	0	0	0	2	0	0	0	0	0	0
Root; k__Eukaryota; p__Alveolata; c__Ciliophora; o__Intramacronucleata; f__Oligohymenophorea_None6252	0	0	0	0	0	0	0	0	0	0	5	0	0	0
Root; k__Eukaryota; p__Alveolata; c__Ciliophora; o__Intramacronucleata; f__Oligohymenophorea_None6258	0	0	2	0	0	0	0	0	0	0	0	0	0	0
Root; k__Eukaryota; p__Alveolata; c__Ciliophora; o__Intramacronucleata; f__Oligohymenophorea_None6311	0	0	0	0	0	0	0	0	0	0	0	0	0	6
Root; k__Eukaryota; p__Alveolata; c__Ciliophora; o__Intramacronucleata; f__Oligohymenophorea_None6317	0	0	0	0	0	0	0	0	0	0	0	0	1	0
Root; k__Eukaryota; p__Alveolata; c__Ciliophora; o__Intramacronucleata; f__Oligohymenophorea_None6351	0	0	0	0	0	0	0	0	0	0	0	0	0	17
Root; k__Eukaryota; p__Alveolata; c__Ciliophora; o__Intramacronucleata; f__Oligohymenophorea_None6410	0	0	0	0	0	0	0	4	0	0	0	0	0	0
Root; k__Eukaryota; p__Alveolata; c__Ciliophora; o__Intramacronucleata; f__Oligohymenophorea_None6425	0	0	0	0	0	0	0	0	1	0	0	5	0	2
Root; k__Eukaryota; p__Alveolata; c__Ciliophora; o__Intramacronucleata; f__Oligohymenophorea_None6431	0	0	0	0	0	0	0	0	0	1	0	0	0	0
Root; k__Eukaryota; p__Alveolata; c__Ciliophora; o__Intramacronucleata; f__Oligohymenophorea_None6469	0	0	0	2	0	2	0	2	1	1	0	6	0	5
Root; k__Eukaryota; p__Alveolata; c__Ciliophora; o__Intramacronucleata; f__Oligohymenophorea_None6471	0	0	1	33	0	0	0	1	0	0	0	0	0	1
Root; k__Eukaryota; p__Alveolata; c__Ciliophora; o__Intramacronucleata; f__Oligohymenophorea_None6509	0	0	0	0	0	0	0	9	2	0	0	0	0	0
Root; k__Eukaryota; p__Alveolata; c__Ciliophora; o__Intramacronucleata; f__Oligohymenophorea_None6573	0	0	0	0	0	0	0	2	0	0	0	0	0	0
Root; k__Eukaryota; p__Alveolata; c__Ciliophora; o__Intramacronucleata; f__Oligohymenophorea_None6582	0	0	1	0	0	0	0	0	0	0	8	0	0	0
Root; k__Eukaryota; p__Alveolata; c__Ciliophora; o__Intramacronucleata; f__Oligohymenophorea_None6597	0	0	0	0	0	0	2	0	1	0	12	2	0	0
Root; k__Eukaryota; p__Alveolata; c__Ciliophora; o__Intramacronucleata; f__Oligohymenophorea_None6612	0	0	0	0	0	0	0	1	0	0	0	0	0	0
Root; k__Eukaryota; p__Alveolata; c__Ciliophora; o__Intramacronucleata; f__Oligohymenophorea_None6672	0	0	0	0	0	0	0	1	0	0	0	0	0	0
Root; k__Eukaryota; p__Alveolata; c__Ciliophora; o__Intramacronucleata; f__Oligohymenophorea_None6701	0	2	0	0	0	23	0	0	0	0	2	0	0	0
Root; k__Eukaryota; p__Alveolata; c__Ciliophora; o__Intramacronucleata; f__Oligohymenophorea_None6752	0	0	0	0	0	0	0	0	0	0	0	0	1	17
Root; k__Eukaryota; p__Alveolata; c__Ciliophora; o__Intramacronucleata; f__Oligohymenophorea_None6789	0	0	0	0	0	0	0	0	0	0	1	0	0	0
Root; k__Eukaryota; p__Alveolata; c__Ciliophora; o__Intramacronucleata; f__Oligohymenophorea_None6798	0	0	0	0	0	0	0	0	0	0	0	0	0	1
Root; k__Eukaryota; p__Alveolata; c__Ciliophora; o__Intramacronucleata; f__Oligohymenophorea_None6807	0	0	0	0	0	0	0	0	0	1	0	0	0	0
Root; k__Eukaryota; p__Alveolata; c__Ciliophora; o__Intramacronucleata; f__Oligohymenophorea_None6823	0	0	0	0	0	0	0	0	4	0	0	0	0	0
Root; k__Eukaryota; p__Alveolata; c__Ciliophora; o__Intramacronucleata; f__Oligohymenophorea_None6849	0	0	0	0	0	0	0	0	0	0	0	3	0	0
Root; k__Eukaryota; p__Alveolata; c__Ciliophora; o__Intramacronucleata; f__Oligohymenophorea_None6867	0	0	0	0	0	0	1	1	0	0	4	2	0	0
Root; k__Eukaryota; p__Alveolata; c__Ciliophora; o__Intramacronucleata; f__Oligohymenophorea_None6894	0	0	0	0	0	0	0	0	0	0	1	0	0	0
Root; k__Eukaryota; p__Alveolata; c__Ciliophora; o__Intramacronucleata; f__Oligohymenophorea_None6896	0	0	0	0	0	0	0	1	0	0	0	0	0	0
Root; k__Eukaryota; p__Alveolata; c__Ciliophora; o__Intramacronucleata; f__Oligohymenophorea_None6903	0	0	0	0	0	0	10	13	0	0	0	0	0	0
Root; k__Eukaryota; p__Alveolata; c__Ciliophora; o__Intramacronucleata; f__Oligohymenophorea_None6905	0	0	1	0	0	0	0	0	1	3	6	5	0	0
Root; k__Eukaryota; p__Alveolata; c__Ciliophora; o__Intramacronucleata; f__Oligohymenophorea_None6913	0	0	0	0	0	0	0	13	0	0	0	0	0	0
Root; k__Eukaryota; p__Alveolata; c__Ciliophora; o__Intramacronucleata; f__Oligohymenophorea_None6935	0	0	0	0	0	0	1	4	0	1	2	0	0	0
Root; k__Eukaryota; p__Alveolata; c__Ciliophora; o__Intramacronucleata; f__Oligohymenophorea_None6939	0	0	0	0	0	0	0	0	0	0	0	0	0	11
Root; k__Eukaryota; p__Alveolata; c__Ciliophora; o__Intramacronucleata; f__Oligohymenophorea_None697	0	0	0	0	0	0	0	0	0	0	0	0	0	10
Root; k__Eukaryota; p__Alveolata; c__Ciliophora; o__Intramacronucleata; f__Oligohymenophorea_None7047	0	0	0	0	0	0	0	0	0	0	0	0	0	30
Root; k__Eukaryota; p__Alveolata; c__Ciliophora; o__Intramacronucleata; f__Oligohymenophorea_None7072	0	0	0	0	0	0	0	0	0	0	1	0	0	0
Root; k__Eukaryota; p__Alveolata; c__Ciliophora; o__Intramacronucleata; f__Oligohymenophorea_None7107	0	0	0	0	0	1	0	0	0	0	0	0	0	9
Root; k__Eukaryota; p__Alveolata; c__Ciliophora; o__Intramacronucleata; f__Oligohymenophorea_None713	0	0	0	0	0	0	1	4	2	0	8	0	0	0
Root; k__Eukaryota; p__Alveolata; c__Ciliophora; o__Intramacronucleata; f__Oligohymenophorea_None7130	4	0	0	0	0	0	0	0	0	0	0	0	0	0
Root; k__Eukaryota; p__Alveolata; c__Ciliophora; o__Intramacronucleata; f__Oligohymenophorea_None7137	0	0	1	8	0	0	0	0	0	0	0	2	0	0
Root; k__Eukaryota; p__Alveolata; c__Ciliophora; o__Intramacronucleata; f__Oligohymenophorea_None7148	0	0	0	0	0	0	0	0	0	0	0	0	0	1
Root; k__Eukaryota; p__Alveolata; c__Ciliophora; o__Intramacronucleata; f__Oligohymenophorea_None717	0	0	0	0	0	0	0	0	2	0	0	0	0	0
Root; k__Eukaryota; p__Alveolata; c__Ciliophora; o__Intramacronucleata; f__Oligohymenophorea_None7174	0	0	0	0	0	0	1	0	1	3	8	0	0	0
Root; k__Eukaryota; p__Alveolata; c__Ciliophora; o__Intramacronucleata; f__Oligohymenophorea_None7198	0	0	1	2	0	0	0	7	3	1	1	12	0	1
Root; k__Eukaryota; p__Alveolata; c__Ciliophora; o__Intramacronucleata; f__Oligohymenophorea_None7224	0	0	0	0	0	0	0	0	0	0	0	0	0	1
Root; k__Eukaryota; p__Alveolata; c__Ciliophora; o__Intramacronucleata; f__Oligohymenophorea_None7238	0	0	0	0	0	0	0	4	0	0	0	0	0	0
Root; k__Eukaryota; p__Alveolata; c__Ciliophora; o__Intramacronucleata; f__Oligohymenophorea_None7282	0	0	0	0	0	0	0	0	0	0	0	0	0	75
Root; k__Eukaryota; p__Alveolata; c__Ciliophora; o__Intramacronucleata; f__Oligohymenophorea_None7314	0	0	0	0	0	0	0	0	0	0	0	0	0	1
Root; k__Eukaryota; p__Alveolata; c__Ciliophora; o__Intramacronucleata; f__Oligohymenophorea_None7433	0	0	0	0	0	0	0	0	0	2	0	0	0	0
Root; k__Eukaryota; p__Alveolata; c__Ciliophora; o__Intramacronucleata; f__Oligohymenophorea_None7464	0	0	0	0	0	0	0	0	0	0	0	2	0	0
Root; k__Eukaryota; p__Alveolata; c__Ciliophora; o__Intramacronucleata; f__Oligohymenophorea_None749	0	3	0	2	0	0	0	18	3	6	0	9	0	5
Root; k__Eukaryota; p__Alveolata; c__Ciliophora; o__Intramacronucleata; f__Oligohymenophorea_None75	0	1	0	39	0	0	0	0	0	0	0	0	0	0
Root; k__Eukaryota; p__Alveolata; c__Ciliophora; o__Intramacronucleata; f__Oligohymenophorea_None750	0	0	0	0	0	0	0	2	0	0	1	4	0	4
Root; k__Eukaryota; p__Alveolata; c__Ciliophora; o__Intramacronucleata; f__Oligohymenophorea_None7520	0	0	0	0	0	0	0	0	0	0	0	1	0	0
Root; k__Eukaryota; p__Alveolata; c__Ciliophora; o__Intramacronucleata; f__Oligohymenophorea_None7545	0	4	0	0	0	38	0	0	0	0	5	0	0	0
Root; k__Eukaryota; p__Alveolata; c__Ciliophora; o__Intramacronucleata; f__Oligohymenophorea_None7546	0	20	1	0	0	0	10	3	0	0	0	1	0	79
Root; k__Eukaryota; p__Alveolata; c__Ciliophora; o__Intramacronucleata; f__Oligohymenophorea_None7566	0	0	0	0	0	0	0	4	0	0	0	5	0	32
Root; k__Eukaryota; p__Alveolata; c__Ciliophora; o__Intramacronucleata; f__Oligohymenophorea_None7590	0	0	0	0	0	0	1	0	0	0	0	0	0	0
Root; k__Eukaryota; p__Alveolata; c__Ciliophora; o__Intramacronucleata; f__Oligohymenophorea_None7600	0	0	0	0	0	0	0	0	1	1	0	0	0	0
Root; k__Eukaryota; p__Alveolata; c__Ciliophora; o__Intramacronucleata; f__Oligohymenophorea_None7622	0	0	0	0	0	0	0	0	0	0	0	0	0	14
Root; k__Eukaryota; p__Alveolata; c__Ciliophora; o__Intramacronucleata; f__Oligohymenophorea_None763	0	0	0	0	0	0	0	0	0	0	0	0	0	2
Root; k__Eukaryota; p__Alveolata; c__Ciliophora; o__Intramacronucleata; f__Oligohymenophorea_None7633	0	0	0	0	0	0	0	0	0	0	0	0	0	6
Root; k__Eukaryota; p__Alveolata; c__Ciliophora; o__Intramacronucleata; f__Oligohymenophorea_None7667	0	0	0	0	0	0	0	2	0	0	0	0	0	0
Root; k__Eukaryota; p__Alveolata; c__Ciliophora; o__Intramacronucleata; f__Oligohymenophorea_None7725	0	0	0	0	0	25	0	0	0	0	3	0	0	0
Root; k__Eukaryota; p__Alveolata; c__Ciliophora; o__Intramacronucleata; f__Oligohymenophorea_None7738	0	0	0	0	0	0	6	0	0	0	0	0	0	0
Root; k__Eukaryota; p__Alveolata; c__Ciliophora; o__Intramacronucleata; f__Oligohymenophorea_None7793	0	0	0	0	0	0	1	1	2	0	3	1	0	0
Root; k__Eukaryota; p__Alveolata; c__Ciliophora; o__Intramacronucleata; f__Oligohymenophorea_None7802	0	0	0	0	0	0	0	0	0	0	0	0	0	5
Root; k__Eukaryota; p__Alveolata; c__Ciliophora; o__Intramacronucleata; f__Oligohymenophorea_None7805	0	0	0	0	0	0	0	0	0	0	0	0	0	79
Root; k__Eukaryota; p__Alveolata; c__Ciliophora; o__Intramacronucleata; f__Oligohymenophorea_None7890	0	0	0	0	0	2	0	0	0	0	0	0	0	0
Root; k__Eukaryota; p__Alveolata; c__Ciliophora; o__Intramacronucleata; f__Oligohymenophorea_None7910	0	0	0	0	0	0	0	1	0	0	0	0	0	11
Root; k__Eukaryota; p__Alveolata; c__Ciliophora; o__Intramacronucleata; f__Oligohymenophorea_None7924	0	0	0	0	0	0	0	0	0	0	0	0	0	11
Root; k__Eukaryota; p__Alveolata; c__Ciliophora; o__Intramacronucleata; f__Oligohymenophorea_None7981	1	0	0	0	0	0	0	0	0	0	0	0	0	0
Root; k__Eukaryota; p__Alveolata; c__Ciliophora; o__Intramacronucleata; f__Oligohymenophorea_None7999	0	0	0	0	0	0	0	0	0	0	0	0	0	1
Root; k__Eukaryota; p__Alveolata; c__Ciliophora; o__Intramacronucleata; f__Oligohymenophorea_None8001	0	0	0	0	0	0	0	1	0	0	1	0	0	4
Root; k__Eukaryota; p__Alveolata; c__Ciliophora; o__Intramacronucleata; f__Oligohymenophorea_None804	0	0	0	0	0	0	0	0	0	0	0	0	0	14
Root; k__Eukaryota; p__Alveolata; c__Ciliophora; o__Intramacronucleata; f__Oligohymenophorea_None8053	0	0	0	0	0	0	1	1	0	0	4	5	0	0
Root; k__Eukaryota; p__Alveolata; c__Ciliophora; o__Intramacronucleata; f__Oligohymenophorea_None8061	0	0	0	0	0	0	0	0	0	0	0	0	0	3
Root; k__Eukaryota; p__Alveolata; c__Ciliophora; o__Intramacronucleata; f__Oligohymenophorea_None8062	0	0	0	0	0	0	0	0	0	0	0	0	0	4
Root; k__Eukaryota; p__Alveolata; c__Ciliophora; o__Intramacronucleata; f__Oligohymenophorea_None8090	0	0	0	0	0	0	0	0	0	0	0	0	0	2
Root; k__Eukaryota; p__Alveolata; c__Ciliophora; o__Intramacronucleata; f__Oligohymenophorea_None8096	0	0	0	0	0	0	0	0	0	0	0	0	0	33
Root; k__Eukaryota; p__Alveolata; c__Ciliophora; o__Intramacronucleata; f__Oligohymenophorea_None8199	0	0	0	0	0	0	6	0	0	0	0	0	0	0
Root; k__Eukaryota; p__Alveolata; c__Ciliophora; o__Intramacronucleata; f__Oligohymenophorea_None8216	0	0	0	0	0	0	0	0	0	0	0	0	0	4
Root; k__Eukaryota; p__Alveolata; c__Ciliophora; o__Intramacronucleata; f__Oligohymenophorea_None8232	0	0	0	0	0	0	1	0	0	0	6	0	0	0
Root; k__Eukaryota; p__Alveolata; c__Ciliophora; o__Intramacronucleata; f__Oligohymenophorea_None8242	0	0	0	0	0	0	0	0	0	0	0	0	0	4
Root; k__Eukaryota; p__Alveolata; c__Ciliophora; o__Intramacronucleata; f__Oligohymenophorea_None8257	0	0	0	0	0	0	0	0	0	0	0	0	0	12
Root; k__Eukaryota; p__Alveolata; c__Ciliophora; o__Intramacronucleata; f__Oligohymenophorea_None8281	0	0	0	0	0	0	0	0	2	0	0	0	0	34
Root; k__Eukaryota; p__Alveolata; c__Ciliophora; o__Intramacronucleata; f__Oligohymenophorea_None830	0	0	0	0	0	0	0	0	0	0	3	0	0	0
Root; k__Eukaryota; p__Alveolata; c__Ciliophora; o__Intramacronucleata; f__Oligohymenophorea_None8305	0	0	0	0	0	0	0	0	0	0	0	0	0	1
Root; k__Eukaryota; p__Alveolata; c__Ciliophora; o__Intramacronucleata; f__Oligohymenophorea_None837	0	0	0	0	0	0	0	1	0	0	0	0	0	5
Root; k__Eukaryota; p__Alveolata; c__Ciliophora; o__Intramacronucleata; f__Oligohymenophorea_None8404	0	0	0	0	0	0	0	0	2	0	2	0	0	0
Root; k__Eukaryota; p__Alveolata; c__Ciliophora; o__Intramacronucleata; f__Oligohymenophorea_None8440	0	0	0	0	0	0	0	0	0	0	0	0	0	2
Root; k__Eukaryota; p__Alveolata; c__Ciliophora; o__Intramacronucleata; f__Oligohymenophorea_None8445	0	0	0	0	0	0	0	0	0	0	0	0	0	1
Root; k__Eukaryota; p__Alveolata; c__Ciliophora; o__Intramacronucleata; f__Oligohymenophorea_None8462	0	0	0	0	0	0	0	3	0	0	0	0	0	0
Root; k__Eukaryota; p__Alveolata; c__Ciliophora; o__Intramacronucleata; f__Oligohymenophorea_None8514	0	0	0	0	0	0	4	4	2	2	8	1	0	0
Root; k__Eukaryota; p__Alveolata; c__Ciliophora; o__Intramacronucleata; f__Oligohymenophorea_None8517	0	0	0	0	0	0	5	3	0	0	0	0	0	0
Root; k__Eukaryota; p__Alveolata; c__Ciliophora; o__Intramacronucleata; f__Oligohymenophorea_None8519	0	0	0	0	0	0	0	2	0	0	0	0	0	0
Root; k__Eukaryota; p__Alveolata; c__Ciliophora; o__Intramacronucleata; f__Oligohymenophorea_None852	0	0	0	0	0	0	0	0	0	0	0	0	0	5
Root; k__Eukaryota; p__Alveolata; c__Ciliophora; o__Intramacronucleata; f__Oligohymenophorea_None8524	0	0	0	0	0	0	0	0	0	0	0	0	0	3
Root; k__Eukaryota; p__Alveolata; c__Ciliophora; o__Intramacronucleata; f__Oligohymenophorea_None8530	0	0	0	0	0	0	0	0	0	0	0	0	0	2
Root; k__Eukaryota; p__Alveolata; c__Ciliophora; o__Intramacronucleata; f__Oligohymenophorea_None8638	0	0	0	0	0	0	2	0	2	0	0	0	0	0
Root; k__Eukaryota; p__Alveolata; c__Ciliophora; o__Intramacronucleata; f__Oligohymenophorea_None8643	0	0	0	0	0	0	0	0	0	1	0	0	0	0
Root; k__Eukaryota; p__Alveolata; c__Ciliophora; o__Intramacronucleata; f__Oligohymenophorea_None8657	0	0	0	0	0	0	1	0	0	0	2	0	0	7
Root; k__Eukaryota; p__Alveolata; c__Ciliophora; o__Intramacronucleata; f__Oligohymenophorea_None8667	0	0	0	0	0	0	0	0	3	0	0	0	0	0
Root; k__Eukaryota; p__Alveolata; c__Ciliophora; o__Intramacronucleata; f__Oligohymenophorea_None8681	0	0	0	0	0	0	0	0	0	0	0	0	0	107
Root; k__Eukaryota; p__Alveolata; c__Ciliophora; o__Intramacronucleata; f__Oligohymenophorea_None8800	0	0	0	0	0	0	0	2	0	0	0	0	0	0
Root; k__Eukaryota; p__Alveolata; c__Ciliophora; o__Intramacronucleata; f__Oligohymenophorea_None8801	0	0	0	0	0	0	0	0	0	7	0	8	0	2
Root; k__Eukaryota; p__Alveolata; c__Ciliophora; o__Intramacronucleata; f__Oligohymenophorea_None8808	0	0	0	0	0	0	0	0	0	0	0	0	0	7
Root; k__Eukaryota; p__Alveolata; c__Ciliophora; o__Intramacronucleata; f__Oligohymenophorea_None881	0	0	0	0	0	0	0	1	0	0	0	0	0	0
Root; k__Eukaryota; p__Alveolata; c__Ciliophora; o__Intramacronucleata; f__Oligohymenophorea_None8862	0	0	0	0	0	0	0	0	0	0	1	0	0	0
Root; k__Eukaryota; p__Alveolata; c__Ciliophora; o__Intramacronucleata; f__Oligohymenophorea_None8902	0	0	0	0	0	1	0	0	0	0	0	0	0	0
Root; k__Eukaryota; p__Alveolata; c__Ciliophora; o__Intramacronucleata; f__Oligohymenophorea_None8948	0	0	0	0	0	0	0	0	0	0	0	1	0	6
Root; k__Eukaryota; p__Alveolata; c__Ciliophora; o__Intramacronucleata; f__Oligohymenophorea_None8958	0	0	0	0	0	0	0	0	1	0	0	0	0	37
Root; k__Eukaryota; p__Alveolata; c__Ciliophora; o__Intramacronucleata; f__Oligohymenophorea_None8959	0	0	0	0	0	2	0	1	0	0	0	0	0	0
Root; k__Eukaryota; p__Alveolata; c__Ciliophora; o__Intramacronucleata; f__Oligohymenophorea_None8966	0	0	0	0	0	0	0	0	0	0	0	0	0	4
Root; k__Eukaryota; p__Alveolata; c__Ciliophora; o__Intramacronucleata; f__Oligohymenophorea_None8983	0	0	0	0	0	0	0	0	0	0	1	0	0	0
Root; k__Eukaryota; p__Alveolata; c__Ciliophora; o__Intramacronucleata; f__Oligohymenophorea_None899	0	0	0	0	0	0	0	0	0	0	1	0	0	0
Root; k__Eukaryota; p__Alveolata; c__Ciliophora; o__Intramacronucleata; f__Oligohymenophorea_None8991	0	0	0	0	0	0	0	18	8	0	0	0	0	0
Root; k__Eukaryota; p__Alveolata; c__Ciliophora; o__Intramacronucleata; f__Oligohymenophorea_None9003	0	0	0	0	0	0	2	0	0	0	0	0	0	0
Root; k__Eukaryota; p__Alveolata; c__Ciliophora; o__Intramacronucleata; f__Oligohymenophorea_None9007	0	0	0	0	0	0	0	1	0	0	0	0	0	1
Root; k__Eukaryota; p__Alveolata; c__Ciliophora; o__Intramacronucleata; f__Oligohymenophorea_None9012	0	0	0	0	0	0	0	0	0	0	0	0	0	1
Root; k__Eukaryota; p__Alveolata; c__Ciliophora; o__Intramacronucleata; f__Oligohymenophorea_None902	0	0	0	0	0	0	0	0	0	0	0	0	0	16
Root; k__Eukaryota; p__Alveolata; c__Ciliophora; o__Intramacronucleata; f__Oligohymenophorea_None9024	0	0	1	0	0	0	0	0	0	0	0	0	0	2
Root; k__Eukaryota; p__Alveolata; c__Ciliophora; o__Intramacronucleata; f__Oligohymenophorea_None908	0	0	0	0	0	0	0	0	1	0	0	0	0	0
Root; k__Eukaryota; p__Alveolata; c__Ciliophora; o__Intramacronucleata; f__Oligohymenophorea_None9111	0	0	0	0	0	0	0	1	0	1	2	2	0	0
Root; k__Eukaryota; p__Alveolata; c__Ciliophora; o__Intramacronucleata; f__Oligohymenophorea_None9114	0	0	0	0	0	0	0	0	0	0	0	0	0	18
Root; k__Eukaryota; p__Alveolata; c__Ciliophora; o__Intramacronucleata; f__Oligohymenophorea_None9127	0	0	0	0	0	0	0	0	0	0	0	0	0	2
Root; k__Eukaryota; p__Alveolata; c__Ciliophora; o__Intramacronucleata; f__Oligohymenophorea_None9131	0	0	0	0	0	0	0	0	0	0	0	0	0	3
Root; k__Eukaryota; p__Alveolata; c__Ciliophora; o__Intramacronucleata; f__Oligohymenophorea_None9219	0	0	0	0	0	0	0	0	0	0	0	0	0	5
Root; k__Eukaryota; p__Alveolata; c__Ciliophora; o__Intramacronucleata; f__Oligohymenophorea_None9284	0	0	0	0	0	0	0	3	0	0	0	0	0	0
Root; k__Eukaryota; p__Alveolata; c__Ciliophora; o__Intramacronucleata; f__Oligohymenophorea_None9317	0	0	2	0	0	0	0	0	0	0	0	0	0	0
Root; k__Eukaryota; p__Alveolata; c__Ciliophora; o__Intramacronucleata; f__Oligohymenophorea_None9345	0	0	0	0	0	0	0	0	0	0	2	0	0	0
Root; k__Eukaryota; p__Alveolata; c__Ciliophora; o__Intramacronucleata; f__Oligohymenophorea_None9355	0	0	0	1	0	0	0	2	2	6	1	3	0	101
Root; k__Eukaryota; p__Alveolata; c__Ciliophora; o__Intramacronucleata; f__Oligohymenophorea_None9469	0	0	0	0	0	0	0	0	0	0	0	0	0	10
Root; k__Eukaryota; p__Alveolata; c__Ciliophora; o__Intramacronucleata; f__Oligohymenophorea_None9472	0	0	0	0	0	0	0	0	2	0	0	0	0	142
Root; k__Eukaryota; p__Alveolata; c__Ciliophora; o__Intramacronucleata; f__Oligohymenophorea_None9486	0	0	0	0	0	0	0	0	0	0	0	0	0	1
Root; k__Eukaryota; p__Alveolata; c__Ciliophora; o__Intramacronucleata; f__Oligohymenophorea_None951	0	0	0	0	0	0	0	0	0	0	1	0	0	0
Root; k__Eukaryota; p__Alveolata; c__Ciliophora; o__Intramacronucleata; f__Oligohymenophorea_None9576	0	0	0	0	0	0	1	0	1	2	5	0	0	0
Root; k__Eukaryota; p__Alveolata; c__Ciliophora; o__Intramacronucleata; f__Oligohymenophorea_None9583	0	0	0	0	0	0	0	0	0	0	0	3	0	0
Root; k__Eukaryota; p__Alveolata; c__Ciliophora; o__Intramacronucleata; f__Oligohymenophorea_None9601	0	0	0	0	0	0	0	1	0	0	0	0	0	0
Root; k__Eukaryota; p__Alveolata; c__Ciliophora; o__Intramacronucleata; f__Oligohymenophorea_None962	0	0	0	1	0	0	0	2	0	0	4	14	0	11
Root; k__Eukaryota; p__Alveolata; c__Ciliophora; o__Intramacronucleata; f__Oligohymenophorea_None9675	0	0	0	0	0	0	0	0	0	0	2	0	0	0
Root; k__Eukaryota; p__Alveolata; c__Ciliophora; o__Intramacronucleata; f__Oligohymenophorea_None9677	0	0	0	0	0	0	0	0	0	0	1	0	0	10
Root; k__Eukaryota; p__Alveolata; c__Ciliophora; o__Intramacronucleata; f__Oligohymenophorea_None9701	0	1	0	0	0	0	1	0	0	0	0	0	0	1
Root; k__Eukaryota; p__Alveolata; c__Ciliophora; o__Intramacronucleata; f__Oligohymenophorea_None9706	0	0	0	0	0	0	0	0	0	0	0	0	0	13
Root; k__Eukaryota; p__Alveolata; c__Ciliophora; o__Intramacronucleata; f__Oligohymenophorea_None9722	0	0	0	0	0	0	0	0	0	0	0	0	0	13
Root; k__Eukaryota; p__Alveolata; c__Ciliophora; o__Intramacronucleata; f__Oligohymenophorea_None9841	0	0	0	0	0	0	0	0	0	0	0	0	0	2
Root; k__Eukaryota; p__Alveolata; c__Ciliophora; o__Intramacronucleata; f__Oligohymenophorea_None9853	0	0	1	0	0	0	0	4	1	2	0	3	0	0
Root; k__Eukaryota; p__Alveolata; c__Ciliophora; o__Intramacronucleata; f__Oligohymenophorea_None9860	0	0	0	0	0	0	0	0	0	0	0	0	0	1
Root; k__Eukaryota; p__Alveolata; c__Ciliophora; o__Intramacronucleata; f__Oligohymenophorea_None9869	0	0	0	0	0	0	0	0	0	0	0	1	0	0
Root; k__Eukaryota; p__Alveolata; c__Ciliophora; o__Intramacronucleata; f__Oligohymenophorea_None9928	0	0	0	0	1	1	0	2	3	1	6	4	0	14
Root; k__Eukaryota; p__Alveolata; c__Ciliophora; o__Intramacronucleata; f__Oligohymenophorea_None9936	0	0	0	0	0	0	1	1	0	1	6	1	0	0
Root; k__Eukaryota; p__Alveolata; c__Ciliophora; o__Intramacronucleata; f__Oligohymenophorea_None9940	0	0	0	0	0	0	0	0	0	0	0	0	0	26
Root; k__Eukaryota; p__Alveolata; c__Ciliophora; o__Intramacronucleata; f__Oligohymenophorea_None9971	0	0	0	0	0	0	0	0	0	0	0	0	0	14
Root; k__Eukaryota; p__Alveolata; c__Ciliophora; o__Intramacronucleata; f__Oligohymenophorea_None9979	0	0	0	0	0	0	0	0	12	0	0	0	0	0
Root; k__Eukaryota; p__Alveolata; c__Ciliophora; o__Intramacronucleata; f__Oligohymenophorea_None9986	0	0	0	0	0	0	0	0	0	0	0	0	0	20
Root; k__Eukaryota; p__Alveolata; c__Ciliophora; o__Intramacronucleata; f__Phyllopharyngea_109836	0	0	0	0	0	0	0	0	0	0	0	0	0	16
Root; k__Eukaryota; p__Alveolata; c__Ciliophora; o__Intramacronucleata; f__Phyllopharyngea_7360	0	0	0	0	0	0	0	0	4	0	0	0	0	0
Root; k__Eukaryota; p__Alveolata; c__Ciliophora; o__Intramacronucleata; f__Phyllopharyngea_75048	0	0	0	0	0	0	0	0	0	0	1	0	0	0
Root; k__Eukaryota; p__Alveolata; c__Ciliophora; o__Intramacronucleata; f__Phyllopharyngea_75900	0	0	0	0	0	0	0	0	0	1	0	0	0	0
Root; k__Eukaryota; p__Alveolata; c__Ciliophora; o__Intramacronucleata; f__Phyllopharyngea_79305	2	0	2	0	0	0	0	4	10	0	0	0	1	6
Root; k__Eukaryota; p__Alveolata; c__Ciliophora; o__Intramacronucleata; f__Phyllopharyngea_None10676	0	0	0	0	0	0	0	8	5	0	0	0	0	0
Root; k__Eukaryota; p__Alveolata; c__Ciliophora; o__Intramacronucleata; f__Phyllopharyngea_None11042	0	0	0	0	0	0	0	0	0	0	4	0	0	0
Root; k__Eukaryota; p__Alveolata; c__Ciliophora; o__Intramacronucleata; f__Phyllopharyngea_None11994	0	0	0	0	0	0	0	1	0	4	0	0	0	0
Root; k__Eukaryota; p__Alveolata; c__Ciliophora; o__Intramacronucleata; f__Phyllopharyngea_None1529	0	0	0	0	0	0	0	0	0	0	0	0	0	2
Root; k__Eukaryota; p__Alveolata; c__Ciliophora; o__Intramacronucleata; f__Phyllopharyngea_None1627	0	0	0	0	0	0	0	1	0	0	0	0	0	0
Root; k__Eukaryota; p__Alveolata; c__Ciliophora; o__Intramacronucleata; f__Phyllopharyngea_None1687	0	0	0	0	0	0	0	0	5	0	0	0	0	0
Root; k__Eukaryota; p__Alveolata; c__Ciliophora; o__Intramacronucleata; f__Phyllopharyngea_None2020	0	0	0	0	0	0	0	1	1	0	0	0	0	0
Root; k__Eukaryota; p__Alveolata; c__Ciliophora; o__Intramacronucleata; f__Phyllopharyngea_None3083	0	0	0	0	0	0	0	0	0	0	0	0	0	8
Root; k__Eukaryota; p__Alveolata; c__Ciliophora; o__Intramacronucleata; f__Phyllopharyngea_None3518	0	0	0	0	0	0	0	0	0	0	0	0	0	1
Root; k__Eukaryota; p__Alveolata; c__Ciliophora; o__Intramacronucleata; f__Phyllopharyngea_None4433	0	0	0	0	0	0	2	0	0	0	0	0	0	0
Root; k__Eukaryota; p__Alveolata; c__Ciliophora; o__Intramacronucleata; f__Phyllopharyngea_None4860	0	0	0	0	0	0	0	0	0	0	0	0	1	1
Root; k__Eukaryota; p__Alveolata; c__Ciliophora; o__Intramacronucleata; f__Phyllopharyngea_None592	0	0	0	0	0	0	0	0	0	0	0	0	0	2
Root; k__Eukaryota; p__Alveolata; c__Ciliophora; o__Intramacronucleata; f__Phyllopharyngea_None6126	2	0	0	0	0	0	0	0	0	0	0	0	0	0
Root; k__Eukaryota; p__Alveolata; c__Ciliophora; o__Intramacronucleata; f__Phyllopharyngea_None6387	0	0	0	0	0	0	0	0	0	0	0	0	0	6
Root; k__Eukaryota; p__Alveolata; c__Ciliophora; o__Intramacronucleata; f__Phyllopharyngea_None725	0	0	0	0	0	0	0	0	0	0	0	0	0	1
Root; k__Eukaryota; p__Alveolata; c__Ciliophora; o__Intramacronucleata; f__Phyllopharyngea_None7301	0	0	0	0	0	0	2	1	3	0	0	0	0	0
Root; k__Eukaryota; p__Alveolata; c__Ciliophora; o__Intramacronucleata; f__Phyllopharyngea_None7574	0	0	0	0	0	0	0	0	0	0	0	0	0	4
Root; k__Eukaryota; p__Alveolata; c__Ciliophora; o__Intramacronucleata; f__Phyllopharyngea_None8704	0	0	0	0	0	0	0	0	1	0	0	0	0	0
Root; k__Eukaryota; p__Alveolata; c__Ciliophora; o__Intramacronucleata; f__Phyllopharyngea_None9164	0	0	0	0	0	0	0	1	0	0	0	0	0	0
Root; k__Eukaryota; p__Alveolata; c__Ciliophora; o__Intramacronucleata; f__Phyllopharyngea_None9968	0	0	0	0	0	0	0	0	0	0	0	0	0	11
Root; k__Eukaryota; p__Alveolata; c__Ciliophora; o__Intramacronucleata; f__Phyllopharyngea_None9989	0	0	1	0	0	0	0	0	0	0	0	0	0	0
Root; k__Eukaryota; p__Alveolata; c__Ciliophora; o__Intramacronucleata; f__Phyllopharyngea_None9993	0	0	0	0	0	0	0	0	0	0	1	0	0	0
Root; k__Eukaryota; p__Alveolata; c__Ciliophora; o__Intramacronucleata; f__Prostomatea_27515	0	4	2	101	4	2	12	6	23	0	2	11	0	36
Root; k__Eukaryota; p__Alveolata; c__Ciliophora; o__Intramacronucleata; f__Prostomatea_6098	0	0	0	0	0	0	5	0	0	0	0	0	0	0
Root; k__Eukaryota; p__Alveolata; c__Ciliophora; o__Intramacronucleata; f__Prostomatea_None10252	0	1	0	9	1	0	2	0	3	0	0	1	0	1
Root; k__Eukaryota; p__Alveolata; c__Ciliophora; o__Intramacronucleata; f__Prostomatea_None11127	0	0	0	2	1	1	2	0	2	0	0	2	0	0
Root; k__Eukaryota; p__Alveolata; c__Ciliophora; o__Intramacronucleata; f__Prostomatea_None1463	0	1	0	1	0	0	1	1	0	0	0	0	0	1
Root; k__Eukaryota; p__Alveolata; c__Ciliophora; o__Intramacronucleata; f__Prostomatea_None1663	0	0	0	1	0	0	0	0	0	0	0	0	0	0
Root; k__Eukaryota; p__Alveolata; c__Ciliophora; o__Intramacronucleata; f__Prostomatea_None3080	0	0	0	0	0	0	0	0	0	0	0	0	0	1
Root; k__Eukaryota; p__Alveolata; c__Ciliophora; o__Intramacronucleata; f__Prostomatea_None3700	0	0	0	0	1	0	0	0	0	0	0	0	1	0
Root; k__Eukaryota; p__Alveolata; c__Ciliophora; o__Intramacronucleata; f__Prostomatea_None4217	0	0	0	0	0	0	1	0	0	0	0	0	0	0
Root; k__Eukaryota; p__Alveolata; c__Ciliophora; o__Intramacronucleata; f__Prostomatea_None4300	0	0	0	3	0	1	0	0	3	0	0	2	0	0
Root; k__Eukaryota; p__Alveolata; c__Ciliophora; o__Intramacronucleata; f__Prostomatea_None4311	0	0	0	6	1	2	0	2	1	0	0	7	0	0
Root; k__Eukaryota; p__Alveolata; c__Ciliophora; o__Intramacronucleata; f__Prostomatea_None4572	0	0	0	1	2	1	0	0	1	0	0	1	0	0
Root; k__Eukaryota; p__Alveolata; c__Ciliophora; o__Intramacronucleata; f__Prostomatea_None4764	0	0	0	0	0	0	2	0	0	0	0	0	0	0
Root; k__Eukaryota; p__Alveolata; c__Ciliophora; o__Intramacronucleata; f__Prostomatea_None5166	0	0	0	0	0	0	0	0	0	0	0	9	0	0
Root; k__Eukaryota; p__Alveolata; c__Ciliophora; o__Intramacronucleata; f__Prostomatea_None5332	0	0	0	1	0	0	0	0	0	0	0	0	0	0
Root; k__Eukaryota; p__Alveolata; c__Ciliophora; o__Intramacronucleata; f__Prostomatea_None6675	0	0	0	0	0	0	0	0	0	0	0	18	0	0
Root; k__Eukaryota; p__Alveolata; c__Ciliophora; o__Intramacronucleata; f__Prostomatea_None6794	0	0	0	0	0	0	0	0	0	0	0	2	0	0
Root; k__Eukaryota; p__Alveolata; c__Ciliophora; o__Intramacronucleata; f__Prostomatea_None7302	0	0	0	1	0	0	0	0	0	0	0	12	0	0
Root; k__Eukaryota; p__Alveolata; c__Ciliophora; o__Intramacronucleata; f__Prostomatea_None7492	0	0	0	0	0	0	1	0	0	0	0	0	0	0
Root; k__Eukaryota; p__Alveolata; c__Ciliophora; o__Intramacronucleata; f__Prostomatea_None8099	0	0	0	47	2	3	3	1	14	0	0	24	0	0
Root; k__Eukaryota; p__Alveolata; c__Ciliophora; o__Intramacronucleata; f__Prostomatea_None8535	0	0	0	0	0	0	0	1	0	0	0	0	0	0
Root; k__Eukaryota; p__Alveolata; c__Ciliophora; o__Intramacronucleata; f__Prostomatea_None880	0	0	0	3	0	0	0	0	0	0	0	0	0	0
Root; k__Eukaryota; p__Alveolata; c__Ciliophora; o__Intramacronucleata; f__Prostomatea_None9999	0	0	0	0	0	0	0	0	1	0	0	0	0	0
Root; k__Eukaryota; p__Alveolata; c__Ciliophora; o__Intramacronucleata; f__Spirotrichea_100147	0	0	1	0	0	0	4	1	1	0	30	15	0	2
Root; k__Eukaryota; p__Alveolata; c__Ciliophora; o__Intramacronucleata; f__Spirotrichea_105103	0	0	3	3	0	0	35	49	22	0	63	6	12	0
Root; k__Eukaryota; p__Alveolata; c__Ciliophora; o__Intramacronucleata; f__Spirotrichea_10625	0	0	0	0	0	0	0	0	0	0	0	0	0	1833
Root; k__Eukaryota; p__Alveolata; c__Ciliophora; o__Intramacronucleata; f__Spirotrichea_108189	0	0	0	0	0	0	0	0	0	0	1	0	0	0
Root; k__Eukaryota; p__Alveolata; c__Ciliophora; o__Intramacronucleata; f__Spirotrichea_13140	0	2	0	6	0	0	13	5	5	3	14	12	1	7
Root; k__Eukaryota; p__Alveolata; c__Ciliophora; o__Intramacronucleata; f__Spirotrichea_15330	5	1	0	0	0	0	12	0	3	3	46	53	26	4
Root; k__Eukaryota; p__Alveolata; c__Ciliophora; o__Intramacronucleata; f__Spirotrichea_18627	0	0	0	0	0	0	0	0	0	0	10	0	0	0
Root; k__Eukaryota; p__Alveolata; c__Ciliophora; o__Intramacronucleata; f__Spirotrichea_18634	0	2	0	0	0	0	0	0	0	0	0	0	0	0
Root; k__Eukaryota; p__Alveolata; c__Ciliophora; o__Intramacronucleata; f__Spirotrichea_26621	0	0	0	0	0	0	0	0	0	0	0	1	0	0
Root; k__Eukaryota; p__Alveolata; c__Ciliophora; o__Intramacronucleata; f__Spirotrichea_3743	0	0	0	0	0	0	0	0	0	0	1	0	0	0
Root; k__Eukaryota; p__Alveolata; c__Ciliophora; o__Intramacronucleata; f__Spirotrichea_40846	0	0	0	0	0	0	0	0	0	0	0	5	0	0
Root; k__Eukaryota; p__Alveolata; c__Ciliophora; o__Intramacronucleata; f__Spirotrichea_41125	0	0	0	0	0	0	0	0	0	0	0	0	0	2
Root; k__Eukaryota; p__Alveolata; c__Ciliophora; o__Intramacronucleata; f__Spirotrichea_51232	0	0	0	0	0	1	0	0	0	0	0	0	0	0
Root; k__Eukaryota; p__Alveolata; c__Ciliophora; o__Intramacronucleata; f__Spirotrichea_51925	0	0	0	0	0	0	28	1	59	0	0	0	0	1
Root; k__Eukaryota; p__Alveolata; c__Ciliophora; o__Intramacronucleata; f__Spirotrichea_54889	0	8	3	47	0	6	99	44	10	143	52	54	8	1
Root; k__Eukaryota; p__Alveolata; c__Ciliophora; o__Intramacronucleata; f__Spirotrichea_61751	0	0	0	0	0	0	0	0	0	0	0	0	0	144
Root; k__Eukaryota; p__Alveolata; c__Ciliophora; o__Intramacronucleata; f__Spirotrichea_64037	0	5	0	0	0	0	3	2	5	10	14	20	3	65
Root; k__Eukaryota; p__Alveolata; c__Ciliophora; o__Intramacronucleata; f__Spirotrichea_66400	0	0	0	0	0	0	0	0	0	0	1	2	0	0
Root; k__Eukaryota; p__Alveolata; c__Ciliophora; o__Intramacronucleata; f__Spirotrichea_66983	0	0	0	1	0	0	1	1	5	0	2	6	0	2
Root; k__Eukaryota; p__Alveolata; c__Ciliophora; o__Intramacronucleata; f__Spirotrichea_72706	5	0	1	0	18	3	64	15	5	15	94	248	8	234
Root; k__Eukaryota; p__Alveolata; c__Ciliophora; o__Intramacronucleata; f__Spirotrichea_73240	0	0	0	0	0	0	0	0	13	0	591	1197	13	0
Root; k__Eukaryota; p__Alveolata; c__Ciliophora; o__Intramacronucleata; f__Spirotrichea_77134	0	5	2	63	0	0	26	17	1	3	14	0	0	64
Root; k__Eukaryota; p__Alveolata; c__Ciliophora; o__Intramacronucleata; f__Spirotrichea_8056	0	0	0	0	0	0	0	0	0	0	0	1	0	6
Root; k__Eukaryota; p__Alveolata; c__Ciliophora; o__Intramacronucleata; f__Spirotrichea_82075	0	0	0	0	0	0	0	0	0	0	0	0	0	3
Root; k__Eukaryota; p__Alveolata; c__Ciliophora; o__Intramacronucleata; f__Spirotrichea_83004	0	0	0	0	0	0	0	2	3	0	1	2	2	0
Root; k__Eukaryota; p__Alveolata; c__Ciliophora; o__Intramacronucleata; f__Spirotrichea_85699	0	0	0	0	0	0	0	0	0	0	0	1	0	0
Root; k__Eukaryota; p__Alveolata; c__Ciliophora; o__Intramacronucleata; f__Spirotrichea_88229	0	0	0	0	0	0	0	0	0	0	0	0	0	1997
Root; k__Eukaryota; p__Alveolata; c__Ciliophora; o__Intramacronucleata; f__Spirotrichea_88770	0	0	0	0	0	0	0	0	0	1	0	0	0	0
Root; k__Eukaryota; p__Alveolata; c__Ciliophora; o__Intramacronucleata; f__Spirotrichea_90314	0	0	0	0	0	0	0	0	0	0	0	0	2	0
Root; k__Eukaryota; p__Alveolata; c__Ciliophora; o__Intramacronucleata; f__Spirotrichea_9194	0	0	0	0	0	0	0	0	0	0	0	0	0	1
Root; k__Eukaryota; p__Alveolata; c__Ciliophora; o__Intramacronucleata; f__Spirotrichea_92914	1	0	0	0	1	0	0	2	0	0	0	0	0	5
Root; k__Eukaryota; p__Alveolata; c__Ciliophora; o__Intramacronucleata; f__Spirotrichea_98048	0	1	0	0	0	0	4	2	2	6	3	17	0	3
Root; k__Eukaryota; p__Alveolata; c__Ciliophora; o__Intramacronucleata; f__Spirotrichea_None10007	0	0	0	0	0	0	0	0	0	0	2	0	0	0
Root; k__Eukaryota; p__Alveolata; c__Ciliophora; o__Intramacronucleata; f__Spirotrichea_None10050	0	0	0	0	0	0	0	0	0	0	2	0	0	0
Root; k__Eukaryota; p__Alveolata; c__Ciliophora; o__Intramacronucleata; f__Spirotrichea_None10071	0	0	1	0	0	0	1	0	0	2	2	4	1	0
Root; k__Eukaryota; p__Alveolata; c__Ciliophora; o__Intramacronucleata; f__Spirotrichea_None10079	0	0	0	1	0	0	0	0	0	0	0	0	0	0
Root; k__Eukaryota; p__Alveolata; c__Ciliophora; o__Intramacronucleata; f__Spirotrichea_None10101	0	0	0	0	0	0	0	0	0	0	1	0	0	0
Root; k__Eukaryota; p__Alveolata; c__Ciliophora; o__Intramacronucleata; f__Spirotrichea_None10102	0	0	0	0	0	0	0	0	0	0	1	0	0	0
Root; k__Eukaryota; p__Alveolata; c__Ciliophora; o__Intramacronucleata; f__Spirotrichea_None10127	0	0	0	0	0	0	0	0	0	0	0	1	0	0
Root; k__Eukaryota; p__Alveolata; c__Ciliophora; o__Intramacronucleata; f__Spirotrichea_None10150	0	0	0	0	0	0	0	0	0	0	0	0	0	54
Root; k__Eukaryota; p__Alveolata; c__Ciliophora; o__Intramacronucleata; f__Spirotrichea_None10189	0	0	0	0	0	0	0	0	0	0	0	3	0	0
Root; k__Eukaryota; p__Alveolata; c__Ciliophora; o__Intramacronucleata; f__Spirotrichea_None10201	0	0	0	0	0	0	0	0	0	1	0	1	0	0
Root; k__Eukaryota; p__Alveolata; c__Ciliophora; o__Intramacronucleata; f__Spirotrichea_None1021	0	0	0	0	0	0	0	0	0	0	0	2	0	0
Root; k__Eukaryota; p__Alveolata; c__Ciliophora; o__Intramacronucleata; f__Spirotrichea_None10232	0	0	0	0	0	0	0	0	0	1	1	0	3	0
Root; k__Eukaryota; p__Alveolata; c__Ciliophora; o__Intramacronucleata; f__Spirotrichea_None10235	0	0	0	0	0	0	0	0	0	0	0	0	0	241
Root; k__Eukaryota; p__Alveolata; c__Ciliophora; o__Intramacronucleata; f__Spirotrichea_None10245	0	0	0	0	0	0	0	0	0	0	0	14	0	0
Root; k__Eukaryota; p__Alveolata; c__Ciliophora; o__Intramacronucleata; f__Spirotrichea_None10267	0	0	0	0	0	0	0	0	0	0	0	0	0	21
Root; k__Eukaryota; p__Alveolata; c__Ciliophora; o__Intramacronucleata; f__Spirotrichea_None10271	0	0	0	0	0	0	0	0	0	1	0	0	0	0
Root; k__Eukaryota; p__Alveolata; c__Ciliophora; o__Intramacronucleata; f__Spirotrichea_None10304	0	0	0	0	0	0	1	0	0	3	0	7	0	0
Root; k__Eukaryota; p__Alveolata; c__Ciliophora; o__Intramacronucleata; f__Spirotrichea_None10328	0	0	0	0	0	0	0	0	0	0	1	0	0	0
Root; k__Eukaryota; p__Alveolata; c__Ciliophora; o__Intramacronucleata; f__Spirotrichea_None10340	0	0	0	0	0	0	0	0	1	0	2	8	0	0
Root; k__Eukaryota; p__Alveolata; c__Ciliophora; o__Intramacronucleata; f__Spirotrichea_None10344	0	0	0	0	0	0	0	0	0	0	0	0	1	37
Root; k__Eukaryota; p__Alveolata; c__Ciliophora; o__Intramacronucleata; f__Spirotrichea_None10387	0	0	0	0	0	0	9	0	0	0	3	1	0	0
Root; k__Eukaryota; p__Alveolata; c__Ciliophora; o__Intramacronucleata; f__Spirotrichea_None10424	0	0	0	0	0	0	1	1	0	0	1	3	0	0
Root; k__Eukaryota; p__Alveolata; c__Ciliophora; o__Intramacronucleata; f__Spirotrichea_None10430	0	0	0	0	0	0	0	0	0	0	2	0	0	0
Root; k__Eukaryota; p__Alveolata; c__Ciliophora; o__Intramacronucleata; f__Spirotrichea_None10441	0	0	0	0	0	0	0	0	0	0	0	0	0	96
Root; k__Eukaryota; p__Alveolata; c__Ciliophora; o__Intramacronucleata; f__Spirotrichea_None10457	0	0	0	0	0	0	0	0	0	0	2	0	0	15
Root; k__Eukaryota; p__Alveolata; c__Ciliophora; o__Intramacronucleata; f__Spirotrichea_None10463	0	0	0	0	0	0	0	0	0	0	2	1	0	0
Root; k__Eukaryota; p__Alveolata; c__Ciliophora; o__Intramacronucleata; f__Spirotrichea_None10537	0	0	0	0	0	0	0	0	1	2	0	24	0	0
Root; k__Eukaryota; p__Alveolata; c__Ciliophora; o__Intramacronucleata; f__Spirotrichea_None1054	0	0	0	0	0	0	0	0	0	0	0	0	0	8
Root; k__Eukaryota; p__Alveolata; c__Ciliophora; o__Intramacronucleata; f__Spirotrichea_None10599	0	0	0	0	0	0	0	0	0	0	0	0	0	2
Root; k__Eukaryota; p__Alveolata; c__Ciliophora; o__Intramacronucleata; f__Spirotrichea_None10600	0	0	0	0	0	0	0	0	0	0	1	1	0	0
Root; k__Eukaryota; p__Alveolata; c__Ciliophora; o__Intramacronucleata; f__Spirotrichea_None10609	0	0	0	0	0	0	2	0	0	0	0	0	0	0
Root; k__Eukaryota; p__Alveolata; c__Ciliophora; o__Intramacronucleata; f__Spirotrichea_None10616	0	0	0	0	0	0	0	0	0	0	1	0	0	0
Root; k__Eukaryota; p__Alveolata; c__Ciliophora; o__Intramacronucleata; f__Spirotrichea_None10640	0	0	0	0	0	0	0	0	0	0	2	0	0	0
Root; k__Eukaryota; p__Alveolata; c__Ciliophora; o__Intramacronucleata; f__Spirotrichea_None10645	0	0	0	0	0	0	0	0	0	0	8	0	0	0
Root; k__Eukaryota; p__Alveolata; c__Ciliophora; o__Intramacronucleata; f__Spirotrichea_None10678	0	0	0	0	0	0	0	0	0	4	0	2	0	1
Root; k__Eukaryota; p__Alveolata; c__Ciliophora; o__Intramacronucleata; f__Spirotrichea_None10688	0	1	0	0	0	0	2	1	0	1	0	3	0	0
Root; k__Eukaryota; p__Alveolata; c__Ciliophora; o__Intramacronucleata; f__Spirotrichea_None10705	0	0	0	0	0	0	0	0	0	0	1	0	0	0
Root; k__Eukaryota; p__Alveolata; c__Ciliophora; o__Intramacronucleata; f__Spirotrichea_None10716	0	0	0	0	0	0	2	1	0	0	41	13	0	0
Root; k__Eukaryota; p__Alveolata; c__Ciliophora; o__Intramacronucleata; f__Spirotrichea_None10724	0	0	0	0	0	0	0	0	0	0	0	0	0	2
Root; k__Eukaryota; p__Alveolata; c__Ciliophora; o__Intramacronucleata; f__Spirotrichea_None10728	0	0	0	0	0	0	0	0	0	0	1	1	0	0
Root; k__Eukaryota; p__Alveolata; c__Ciliophora; o__Intramacronucleata; f__Spirotrichea_None10730	0	0	0	0	0	0	0	1	0	0	0	0	0	0
Root; k__Eukaryota; p__Alveolata; c__Ciliophora; o__Intramacronucleata; f__Spirotrichea_None10740	0	0	0	0	0	0	0	1	0	0	0	0	0	0
Root; k__Eukaryota; p__Alveolata; c__Ciliophora; o__Intramacronucleata; f__Spirotrichea_None10751	0	0	0	0	0	0	0	0	2	0	2	0	0	0
Root; k__Eukaryota; p__Alveolata; c__Ciliophora; o__Intramacronucleata; f__Spirotrichea_None10758	0	0	0	0	0	0	2	0	0	0	0	1	1	0
Root; k__Eukaryota; p__Alveolata; c__Ciliophora; o__Intramacronucleata; f__Spirotrichea_None10772	0	0	0	0	0	0	0	0	0	0	0	0	0	3
Root; k__Eukaryota; p__Alveolata; c__Ciliophora; o__Intramacronucleata; f__Spirotrichea_None10776	0	0	0	0	0	0	0	0	0	0	7	1	0	0
Root; k__Eukaryota; p__Alveolata; c__Ciliophora; o__Intramacronucleata; f__Spirotrichea_None10813	0	0	0	0	0	0	0	1	0	0	0	0	0	0
Root; k__Eukaryota; p__Alveolata; c__Ciliophora; o__Intramacronucleata; f__Spirotrichea_None10852	0	0	0	0	0	0	0	0	0	0	2	2	0	0
Root; k__Eukaryota; p__Alveolata; c__Ciliophora; o__Intramacronucleata; f__Spirotrichea_None10863	0	0	0	0	0	0	0	0	0	0	0	0	0	12
Root; k__Eukaryota; p__Alveolata; c__Ciliophora; o__Intramacronucleata; f__Spirotrichea_None1088	0	0	0	0	0	0	0	0	0	0	0	0	0	1
Root; k__Eukaryota; p__Alveolata; c__Ciliophora; o__Intramacronucleata; f__Spirotrichea_None10935	0	0	0	0	0	0	0	0	0	0	3	0	0	0
Root; k__Eukaryota; p__Alveolata; c__Ciliophora; o__Intramacronucleata; f__Spirotrichea_None10949	0	0	0	0	0	0	0	0	1	0	11	22	1	0
Root; k__Eukaryota; p__Alveolata; c__Ciliophora; o__Intramacronucleata; f__Spirotrichea_None10967	0	0	0	0	0	0	0	0	0	4	0	1	0	0
Root; k__Eukaryota; p__Alveolata; c__Ciliophora; o__Intramacronucleata; f__Spirotrichea_None10975	0	0	0	0	0	0	8	0	8	0	0	0	0	1
Root; k__Eukaryota; p__Alveolata; c__Ciliophora; o__Intramacronucleata; f__Spirotrichea_None10979	0	0	0	0	0	0	0	0	1	0	0	0	0	0
Root; k__Eukaryota; p__Alveolata; c__Ciliophora; o__Intramacronucleata; f__Spirotrichea_None10982	0	0	0	0	0	0	0	0	0	0	0	0	0	1
Root; k__Eukaryota; p__Alveolata; c__Ciliophora; o__Intramacronucleata; f__Spirotrichea_None10991	0	0	0	0	0	2	2	1	0	3	0	1	0	0
Root; k__Eukaryota; p__Alveolata; c__Ciliophora; o__Intramacronucleata; f__Spirotrichea_None10994	0	0	0	0	0	0	0	0	0	6	1	0	0	0
Root; k__Eukaryota; p__Alveolata; c__Ciliophora; o__Intramacronucleata; f__Spirotrichea_None10995	0	0	0	0	0	0	0	2	0	0	0	0	0	0
Root; k__Eukaryota; p__Alveolata; c__Ciliophora; o__Intramacronucleata; f__Spirotrichea_None1100	0	0	0	0	0	0	0	0	0	0	0	0	0	5
Root; k__Eukaryota; p__Alveolata; c__Ciliophora; o__Intramacronucleata; f__Spirotrichea_None11045	0	0	0	0	0	0	0	0	0	0	0	0	1	0
Root; k__Eukaryota; p__Alveolata; c__Ciliophora; o__Intramacronucleata; f__Spirotrichea_None11156	0	0	0	0	0	0	0	0	0	0	1	0	0	0
Root; k__Eukaryota; p__Alveolata; c__Ciliophora; o__Intramacronucleata; f__Spirotrichea_None1116	0	0	0	0	0	0	0	0	0	0	0	0	0	4
Root; k__Eukaryota; p__Alveolata; c__Ciliophora; o__Intramacronucleata; f__Spirotrichea_None11182	0	0	0	0	0	0	0	0	0	0	1	0	0	0
Root; k__Eukaryota; p__Alveolata; c__Ciliophora; o__Intramacronucleata; f__Spirotrichea_None11199	0	0	0	0	0	0	0	0	0	0	0	0	0	367
Root; k__Eukaryota; p__Alveolata; c__Ciliophora; o__Intramacronucleata; f__Spirotrichea_None11220	0	0	0	0	0	0	0	0	0	0	9	1	0	0
Root; k__Eukaryota; p__Alveolata; c__Ciliophora; o__Intramacronucleata; f__Spirotrichea_None11228	0	0	0	0	0	0	0	0	0	0	0	0	0	39
Root; k__Eukaryota; p__Alveolata; c__Ciliophora; o__Intramacronucleata; f__Spirotrichea_None11230	0	0	0	0	0	0	0	0	0	1	0	0	0	84
Root; k__Eukaryota; p__Alveolata; c__Ciliophora; o__Intramacronucleata; f__Spirotrichea_None11238	0	0	0	0	0	0	0	0	0	0	1	0	0	0
Root; k__Eukaryota; p__Alveolata; c__Ciliophora; o__Intramacronucleata; f__Spirotrichea_None11271	0	0	0	0	0	0	0	0	0	0	55	0	3	0
Root; k__Eukaryota; p__Alveolata; c__Ciliophora; o__Intramacronucleata; f__Spirotrichea_None11273	0	0	1	1	0	0	2	2	0	0	0	3	2	0
Root; k__Eukaryota; p__Alveolata; c__Ciliophora; o__Intramacronucleata; f__Spirotrichea_None11283	0	0	0	0	0	0	0	0	0	0	2	0	0	0
Root; k__Eukaryota; p__Alveolata; c__Ciliophora; o__Intramacronucleata; f__Spirotrichea_None11287	0	0	0	0	0	0	0	0	0	0	0	0	0	2
Root; k__Eukaryota; p__Alveolata; c__Ciliophora; o__Intramacronucleata; f__Spirotrichea_None113	0	0	0	0	0	0	0	0	0	0	0	0	0	1
Root; k__Eukaryota; p__Alveolata; c__Ciliophora; o__Intramacronucleata; f__Spirotrichea_None11303	0	0	0	0	0	0	0	0	0	0	0	2	0	0
Root; k__Eukaryota; p__Alveolata; c__Ciliophora; o__Intramacronucleata; f__Spirotrichea_None11313	0	0	0	0	0	0	0	0	0	0	0	3	0	0
Root; k__Eukaryota; p__Alveolata; c__Ciliophora; o__Intramacronucleata; f__Spirotrichea_None11365	0	0	0	0	0	0	0	0	0	0	2	0	0	0
Root; k__Eukaryota; p__Alveolata; c__Ciliophora; o__Intramacronucleata; f__Spirotrichea_None11368	0	0	0	0	0	0	0	0	0	0	0	0	0	120
Root; k__Eukaryota; p__Alveolata; c__Ciliophora; o__Intramacronucleata; f__Spirotrichea_None11391	0	0	0	0	0	0	0	0	0	0	0	0	0	2
Root; k__Eukaryota; p__Alveolata; c__Ciliophora; o__Intramacronucleata; f__Spirotrichea_None11428	0	0	0	0	0	0	0	0	0	0	0	0	0	1
Root; k__Eukaryota; p__Alveolata; c__Ciliophora; o__Intramacronucleata; f__Spirotrichea_None11448	0	0	0	0	0	0	0	0	3	0	133	5	0	0
Root; k__Eukaryota; p__Alveolata; c__Ciliophora; o__Intramacronucleata; f__Spirotrichea_None11490	0	0	0	0	0	0	0	0	0	0	0	0	0	1
Root; k__Eukaryota; p__Alveolata; c__Ciliophora; o__Intramacronucleata; f__Spirotrichea_None11497	0	0	0	0	0	0	0	0	0	4	0	0	0	0
Root; k__Eukaryota; p__Alveolata; c__Ciliophora; o__Intramacronucleata; f__Spirotrichea_None11538	0	0	0	0	0	0	0	0	0	0	0	0	0	5
Root; k__Eukaryota; p__Alveolata; c__Ciliophora; o__Intramacronucleata; f__Spirotrichea_None11551	0	0	0	0	0	0	2	0	0	0	0	0	0	0
Root; k__Eukaryota; p__Alveolata; c__Ciliophora; o__Intramacronucleata; f__Spirotrichea_None11579	0	0	0	0	0	0	0	73	0	0	0	30	0	0
Root; k__Eukaryota; p__Alveolata; c__Ciliophora; o__Intramacronucleata; f__Spirotrichea_None11581	0	0	0	0	0	0	0	0	0	0	4	1	0	0
Root; k__Eukaryota; p__Alveolata; c__Ciliophora; o__Intramacronucleata; f__Spirotrichea_None11582	0	12	0	0	16	0	113	51	37	106	28	4	0	168
Root; k__Eukaryota; p__Alveolata; c__Ciliophora; o__Intramacronucleata; f__Spirotrichea_None11611	0	0	0	0	0	0	0	37	0	0	11	0	0	0
Root; k__Eukaryota; p__Alveolata; c__Ciliophora; o__Intramacronucleata; f__Spirotrichea_None11654	0	0	0	0	0	0	0	0	0	0	3	0	0	0
Root; k__Eukaryota; p__Alveolata; c__Ciliophora; o__Intramacronucleata; f__Spirotrichea_None1169	0	0	0	0	0	0	0	0	0	0	1	0	0	0
Root; k__Eukaryota; p__Alveolata; c__Ciliophora; o__Intramacronucleata; f__Spirotrichea_None11692	0	0	0	0	0	0	0	0	0	0	0	0	0	22
Root; k__Eukaryota; p__Alveolata; c__Ciliophora; o__Intramacronucleata; f__Spirotrichea_None11710	0	0	0	0	0	0	0	2	2	0	0	0	0	1
Root; k__Eukaryota; p__Alveolata; c__Ciliophora; o__Intramacronucleata; f__Spirotrichea_None11738	0	1	0	0	0	0	1	0	0	0	11	23	4	0
Root; k__Eukaryota; p__Alveolata; c__Ciliophora; o__Intramacronucleata; f__Spirotrichea_None11752	0	1	0	0	0	0	0	0	0	0	4	0	0	0
Root; k__Eukaryota; p__Alveolata; c__Ciliophora; o__Intramacronucleata; f__Spirotrichea_None11800	0	0	0	0	0	0	0	0	0	0	2	0	0	0
Root; k__Eukaryota; p__Alveolata; c__Ciliophora; o__Intramacronucleata; f__Spirotrichea_None11801	0	0	0	0	0	0	0	0	0	0	0	0	0	5
Root; k__Eukaryota; p__Alveolata; c__Ciliophora; o__Intramacronucleata; f__Spirotrichea_None1184	0	0	0	0	0	0	0	0	0	0	0	0	0	6
Root; k__Eukaryota; p__Alveolata; c__Ciliophora; o__Intramacronucleata; f__Spirotrichea_None11860	0	0	0	0	0	0	0	2	0	0	4	0	0	0
Root; k__Eukaryota; p__Alveolata; c__Ciliophora; o__Intramacronucleata; f__Spirotrichea_None11886	0	0	0	0	0	0	0	0	0	0	1	0	0	0
Root; k__Eukaryota; p__Alveolata; c__Ciliophora; o__Intramacronucleata; f__Spirotrichea_None11889	0	0	0	0	0	0	0	0	0	1	0	0	0	0
Root; k__Eukaryota; p__Alveolata; c__Ciliophora; o__Intramacronucleata; f__Spirotrichea_None11891	0	0	0	0	0	0	0	0	0	0	0	0	0	1
Root; k__Eukaryota; p__Alveolata; c__Ciliophora; o__Intramacronucleata; f__Spirotrichea_None11907	0	0	0	0	0	0	0	0	0	0	0	8	0	0
Root; k__Eukaryota; p__Alveolata; c__Ciliophora; o__Intramacronucleata; f__Spirotrichea_None11915	0	0	0	0	0	0	0	0	0	1	0	0	0	1
Root; k__Eukaryota; p__Alveolata; c__Ciliophora; o__Intramacronucleata; f__Spirotrichea_None11917	0	0	0	0	0	0	0	0	0	0	0	0	1	3
Root; k__Eukaryota; p__Alveolata; c__Ciliophora; o__Intramacronucleata; f__Spirotrichea_None1196	0	0	2	1	0	0	0	0	0	0	0	0	0	0
Root; k__Eukaryota; p__Alveolata; c__Ciliophora; o__Intramacronucleata; f__Spirotrichea_None11974	0	0	0	0	0	0	0	0	0	0	3	0	0	0
Root; k__Eukaryota; p__Alveolata; c__Ciliophora; o__Intramacronucleata; f__Spirotrichea_None11976	0	0	0	0	0	0	0	0	1	0	17	0	0	0
Root; k__Eukaryota; p__Alveolata; c__Ciliophora; o__Intramacronucleata; f__Spirotrichea_None12004	0	0	0	0	0	0	0	0	0	0	0	0	0	23
Root; k__Eukaryota; p__Alveolata; c__Ciliophora; o__Intramacronucleata; f__Spirotrichea_None12013	0	0	0	1	0	0	0	0	0	0	1	1	0	0
Root; k__Eukaryota; p__Alveolata; c__Ciliophora; o__Intramacronucleata; f__Spirotrichea_None1225	0	0	0	0	0	0	1	0	0	0	0	0	0	0
Root; k__Eukaryota; p__Alveolata; c__Ciliophora; o__Intramacronucleata; f__Spirotrichea_None1239	0	0	0	0	0	0	0	0	0	0	1	0	0	0
Root; k__Eukaryota; p__Alveolata; c__Ciliophora; o__Intramacronucleata; f__Spirotrichea_None1257	0	0	0	0	0	0	0	1	0	0	0	0	0	0
Root; k__Eukaryota; p__Alveolata; c__Ciliophora; o__Intramacronucleata; f__Spirotrichea_None1269	0	0	0	0	0	0	0	0	0	0	1	0	0	0
Root; k__Eukaryota; p__Alveolata; c__Ciliophora; o__Intramacronucleata; f__Spirotrichea_None127	0	0	0	0	0	0	0	0	0	0	0	0	0	27
Root; k__Eukaryota; p__Alveolata; c__Ciliophora; o__Intramacronucleata; f__Spirotrichea_None1276	0	0	0	0	0	0	0	0	0	0	0	1	0	0
Root; k__Eukaryota; p__Alveolata; c__Ciliophora; o__Intramacronucleata; f__Spirotrichea_None1300	0	0	0	0	0	0	0	0	0	0	0	0	0	331
Root; k__Eukaryota; p__Alveolata; c__Ciliophora; o__Intramacronucleata; f__Spirotrichea_None1327	0	0	0	0	0	0	7	0	0	2	1	3	0	7
Root; k__Eukaryota; p__Alveolata; c__Ciliophora; o__Intramacronucleata; f__Spirotrichea_None1343	0	0	0	0	0	0	0	0	0	0	0	0	0	1
Root; k__Eukaryota; p__Alveolata; c__Ciliophora; o__Intramacronucleata; f__Spirotrichea_None1355	0	0	0	0	0	0	0	0	0	0	0	1	1	18
Root; k__Eukaryota; p__Alveolata; c__Ciliophora; o__Intramacronucleata; f__Spirotrichea_None1416	0	0	0	0	0	0	0	0	0	0	0	0	0	2
Root; k__Eukaryota; p__Alveolata; c__Ciliophora; o__Intramacronucleata; f__Spirotrichea_None1507	0	0	0	0	0	0	0	0	0	33	11	0	3	0
Root; k__Eukaryota; p__Alveolata; c__Ciliophora; o__Intramacronucleata; f__Spirotrichea_None1514	0	0	0	0	0	0	0	0	0	0	6	1	0	0
Root; k__Eukaryota; p__Alveolata; c__Ciliophora; o__Intramacronucleata; f__Spirotrichea_None1590	0	0	0	0	0	0	0	0	0	3	0	2	0	0
Root; k__Eukaryota; p__Alveolata; c__Ciliophora; o__Intramacronucleata; f__Spirotrichea_None1618	0	0	0	0	0	0	0	0	0	0	1	0	0	0
Root; k__Eukaryota; p__Alveolata; c__Ciliophora; o__Intramacronucleata; f__Spirotrichea_None1676	0	0	0	0	0	0	0	0	0	0	2	5	0	0
Root; k__Eukaryota; p__Alveolata; c__Ciliophora; o__Intramacronucleata; f__Spirotrichea_None1699	0	0	0	0	0	0	0	0	0	0	0	0	0	53
Root; k__Eukaryota; p__Alveolata; c__Ciliophora; o__Intramacronucleata; f__Spirotrichea_None1746	0	0	0	0	0	0	0	0	0	0	0	0	0	6
Root; k__Eukaryota; p__Alveolata; c__Ciliophora; o__Intramacronucleata; f__Spirotrichea_None1758	0	0	0	0	0	0	0	0	0	0	1	0	0	0
Root; k__Eukaryota; p__Alveolata; c__Ciliophora; o__Intramacronucleata; f__Spirotrichea_None1775	0	0	0	0	0	0	0	0	0	0	6	0	0	0
Root; k__Eukaryota; p__Alveolata; c__Ciliophora; o__Intramacronucleata; f__Spirotrichea_None1782	0	0	0	1	0	0	4	0	0	0	0	1	0	0
Root; k__Eukaryota; p__Alveolata; c__Ciliophora; o__Intramacronucleata; f__Spirotrichea_None1804	0	0	0	0	0	0	2	0	0	1	0	2	1	0
Root; k__Eukaryota; p__Alveolata; c__Ciliophora; o__Intramacronucleata; f__Spirotrichea_None1829	0	0	0	0	0	0	0	0	0	0	2	0	0	0
Root; k__Eukaryota; p__Alveolata; c__Ciliophora; o__Intramacronucleata; f__Spirotrichea_None1831	0	0	0	0	0	0	1	0	1	0	0	0	0	0
Root; k__Eukaryota; p__Alveolata; c__Ciliophora; o__Intramacronucleata; f__Spirotrichea_None1843	0	0	0	0	0	0	0	0	0	0	0	0	0	12
Root; k__Eukaryota; p__Alveolata; c__Ciliophora; o__Intramacronucleata; f__Spirotrichea_None1850	0	0	0	0	0	0	1	0	1	0	0	0	0	1
Root; k__Eukaryota; p__Alveolata; c__Ciliophora; o__Intramacronucleata; f__Spirotrichea_None188	0	0	0	0	0	0	0	0	0	0	1	0	0	0
Root; k__Eukaryota; p__Alveolata; c__Ciliophora; o__Intramacronucleata; f__Spirotrichea_None1895	0	0	0	0	0	0	0	0	0	0	0	122	0	0
Root; k__Eukaryota; p__Alveolata; c__Ciliophora; o__Intramacronucleata; f__Spirotrichea_None1900	0	0	0	0	0	0	0	0	0	0	10	0	0	0
Root; k__Eukaryota; p__Alveolata; c__Ciliophora; o__Intramacronucleata; f__Spirotrichea_None1903	0	0	0	0	0	0	0	1	0	0	0	12	0	0
Root; k__Eukaryota; p__Alveolata; c__Ciliophora; o__Intramacronucleata; f__Spirotrichea_None192	0	0	0	0	0	0	0	0	0	0	0	0	2	89
Root; k__Eukaryota; p__Alveolata; c__Ciliophora; o__Intramacronucleata; f__Spirotrichea_None1930	0	0	0	4	0	0	0	0	1	0	3	0	0	0
Root; k__Eukaryota; p__Alveolata; c__Ciliophora; o__Intramacronucleata; f__Spirotrichea_None1934	0	0	0	0	0	0	0	0	0	0	0	0	0	10
Root; k__Eukaryota; p__Alveolata; c__Ciliophora; o__Intramacronucleata; f__Spirotrichea_None1967	0	0	0	0	0	0	0	0	0	0	0	0	0	5
Root; k__Eukaryota; p__Alveolata; c__Ciliophora; o__Intramacronucleata; f__Spirotrichea_None1989	0	0	0	0	0	0	0	0	0	0	1	1	0	0
Root; k__Eukaryota; p__Alveolata; c__Ciliophora; o__Intramacronucleata; f__Spirotrichea_None2008	0	1	0	0	0	0	1	0	0	0	4	0	0	4
Root; k__Eukaryota; p__Alveolata; c__Ciliophora; o__Intramacronucleata; f__Spirotrichea_None2009	0	0	0	0	0	0	0	0	0	0	0	0	0	19
Root; k__Eukaryota; p__Alveolata; c__Ciliophora; o__Intramacronucleata; f__Spirotrichea_None2031	0	0	0	0	0	0	0	0	0	2	3	16	0	0
Root; k__Eukaryota; p__Alveolata; c__Ciliophora; o__Intramacronucleata; f__Spirotrichea_None2077	0	0	0	0	0	0	0	0	0	0	0	0	0	5
Root; k__Eukaryota; p__Alveolata; c__Ciliophora; o__Intramacronucleata; f__Spirotrichea_None2098	0	0	0	0	0	0	0	0	0	2	6	0	0	0
Root; k__Eukaryota; p__Alveolata; c__Ciliophora; o__Intramacronucleata; f__Spirotrichea_None2108	0	0	0	0	0	0	0	0	0	0	2	0	0	0
Root; k__Eukaryota; p__Alveolata; c__Ciliophora; o__Intramacronucleata; f__Spirotrichea_None2111	0	0	0	0	0	0	0	0	0	0	1	0	0	0
Root; k__Eukaryota; p__Alveolata; c__Ciliophora; o__Intramacronucleata; f__Spirotrichea_None2114	0	0	0	0	0	0	0	0	0	0	0	0	0	2
Root; k__Eukaryota; p__Alveolata; c__Ciliophora; o__Intramacronucleata; f__Spirotrichea_None2152	0	0	0	0	0	0	0	0	0	0	5	0	0	0
Root; k__Eukaryota; p__Alveolata; c__Ciliophora; o__Intramacronucleata; f__Spirotrichea_None2171	0	0	0	0	0	0	0	0	0	0	0	0	0	2
Root; k__Eukaryota; p__Alveolata; c__Ciliophora; o__Intramacronucleata; f__Spirotrichea_None2230	0	0	0	0	0	0	1	0	0	0	0	0	0	0
Root; k__Eukaryota; p__Alveolata; c__Ciliophora; o__Intramacronucleata; f__Spirotrichea_None225	0	0	0	0	0	0	0	0	0	0	2	0	0	0
Root; k__Eukaryota; p__Alveolata; c__Ciliophora; o__Intramacronucleata; f__Spirotrichea_None228	0	0	0	0	0	0	0	0	1	1	4	0	0	0
Root; k__Eukaryota; p__Alveolata; c__Ciliophora; o__Intramacronucleata; f__Spirotrichea_None2299	0	0	0	0	0	0	0	0	0	0	0	0	0	1
Root; k__Eukaryota; p__Alveolata; c__Ciliophora; o__Intramacronucleata; f__Spirotrichea_None2313	0	0	0	0	0	0	0	0	0	0	0	0	0	3
Root; k__Eukaryota; p__Alveolata; c__Ciliophora; o__Intramacronucleata; f__Spirotrichea_None2361	0	0	0	0	0	1	2	0	0	0	2	3	0	0
Root; k__Eukaryota; p__Alveolata; c__Ciliophora; o__Intramacronucleata; f__Spirotrichea_None2451	0	0	0	1	0	0	0	0	0	2	1	1	0	0
Root; k__Eukaryota; p__Alveolata; c__Ciliophora; o__Intramacronucleata; f__Spirotrichea_None2455	0	0	0	0	0	0	0	0	0	0	1	0	0	0
Root; k__Eukaryota; p__Alveolata; c__Ciliophora; o__Intramacronucleata; f__Spirotrichea_None247	0	0	0	0	0	0	0	0	0	0	1	0	0	0
Root; k__Eukaryota; p__Alveolata; c__Ciliophora; o__Intramacronucleata; f__Spirotrichea_None2530	0	0	0	0	0	0	0	0	0	2	0	1	0	0
Root; k__Eukaryota; p__Alveolata; c__Ciliophora; o__Intramacronucleata; f__Spirotrichea_None2538	0	0	0	0	0	0	0	0	0	0	0	0	0	18
Root; k__Eukaryota; p__Alveolata; c__Ciliophora; o__Intramacronucleata; f__Spirotrichea_None2550	0	0	0	0	0	0	1	0	0	0	0	0	0	6
Root; k__Eukaryota; p__Alveolata; c__Ciliophora; o__Intramacronucleata; f__Spirotrichea_None258	0	0	0	0	0	0	0	0	0	0	0	0	0	7
Root; k__Eukaryota; p__Alveolata; c__Ciliophora; o__Intramacronucleata; f__Spirotrichea_None2597	0	0	0	0	0	0	3	1	0	1	0	0	0	1
Root; k__Eukaryota; p__Alveolata; c__Ciliophora; o__Intramacronucleata; f__Spirotrichea_None2607	0	0	0	0	0	0	0	0	0	0	5	0	0	0
Root; k__Eukaryota; p__Alveolata; c__Ciliophora; o__Intramacronucleata; f__Spirotrichea_None261	0	0	0	0	0	0	0	0	0	0	0	0	0	10
Root; k__Eukaryota; p__Alveolata; c__Ciliophora; o__Intramacronucleata; f__Spirotrichea_None2624	0	0	0	0	0	0	0	1	0	0	1	0	0	0
Root; k__Eukaryota; p__Alveolata; c__Ciliophora; o__Intramacronucleata; f__Spirotrichea_None2629	0	0	0	0	0	0	0	0	0	0	0	8	0	0
Root; k__Eukaryota; p__Alveolata; c__Ciliophora; o__Intramacronucleata; f__Spirotrichea_None2633	0	0	0	0	0	0	0	0	0	0	0	0	0	108
Root; k__Eukaryota; p__Alveolata; c__Ciliophora; o__Intramacronucleata; f__Spirotrichea_None2672	0	0	0	0	0	0	0	0	0	4	3	0	0	0
Root; k__Eukaryota; p__Alveolata; c__Ciliophora; o__Intramacronucleata; f__Spirotrichea_None2738	0	0	0	0	0	1	0	1	0	0	0	1	0	0
Root; k__Eukaryota; p__Alveolata; c__Ciliophora; o__Intramacronucleata; f__Spirotrichea_None2764	0	0	0	0	0	0	0	0	0	0	0	1	0	0
Root; k__Eukaryota; p__Alveolata; c__Ciliophora; o__Intramacronucleata; f__Spirotrichea_None277	0	0	1	0	0	0	1	0	0	0	0	15	1	0
Root; k__Eukaryota; p__Alveolata; c__Ciliophora; o__Intramacronucleata; f__Spirotrichea_None2791	0	0	0	0	0	0	0	0	0	0	2	0	0	0
Root; k__Eukaryota; p__Alveolata; c__Ciliophora; o__Intramacronucleata; f__Spirotrichea_None2797	0	0	0	0	0	0	0	0	0	0	0	0	0	3
Root; k__Eukaryota; p__Alveolata; c__Ciliophora; o__Intramacronucleata; f__Spirotrichea_None2827	0	0	0	0	0	0	0	0	0	0	2	1	0	0
Root; k__Eukaryota; p__Alveolata; c__Ciliophora; o__Intramacronucleata; f__Spirotrichea_None2877	0	4	0	0	1	0	10	10	17	14	2	7	0	0
Root; k__Eukaryota; p__Alveolata; c__Ciliophora; o__Intramacronucleata; f__Spirotrichea_None2899	0	0	0	0	0	0	4	0	6	0	0	0	0	0
Root; k__Eukaryota; p__Alveolata; c__Ciliophora; o__Intramacronucleata; f__Spirotrichea_None2902	0	0	0	0	0	0	0	0	0	1	0	0	0	0
Root; k__Eukaryota; p__Alveolata; c__Ciliophora; o__Intramacronucleata; f__Spirotrichea_None2921	0	0	0	0	0	0	0	0	0	0	0	0	0	25
Root; k__Eukaryota; p__Alveolata; c__Ciliophora; o__Intramacronucleata; f__Spirotrichea_None2936	0	0	0	0	0	0	0	1	0	0	0	0	0	0
Root; k__Eukaryota; p__Alveolata; c__Ciliophora; o__Intramacronucleata; f__Spirotrichea_None2997	0	0	0	0	0	0	0	0	0	0	0	0	0	31
Root; k__Eukaryota; p__Alveolata; c__Ciliophora; o__Intramacronucleata; f__Spirotrichea_None3004	0	0	0	0	0	0	0	0	0	0	0	0	0	8
Root; k__Eukaryota; p__Alveolata; c__Ciliophora; o__Intramacronucleata; f__Spirotrichea_None3011	0	0	0	0	0	0	0	0	0	0	0	0	0	2
Root; k__Eukaryota; p__Alveolata; c__Ciliophora; o__Intramacronucleata; f__Spirotrichea_None3068	0	0	0	0	0	0	4	0	0	14	6	2	0	2
Root; k__Eukaryota; p__Alveolata; c__Ciliophora; o__Intramacronucleata; f__Spirotrichea_None3069	0	0	0	0	0	0	0	1	0	2	0	0	0	0
Root; k__Eukaryota; p__Alveolata; c__Ciliophora; o__Intramacronucleata; f__Spirotrichea_None3089	0	0	0	0	0	0	0	0	0	0	0	0	0	14
Root; k__Eukaryota; p__Alveolata; c__Ciliophora; o__Intramacronucleata; f__Spirotrichea_None3127	0	0	0	0	0	0	0	1	0	0	0	1	0	0
Root; k__Eukaryota; p__Alveolata; c__Ciliophora; o__Intramacronucleata; f__Spirotrichea_None3223	0	0	0	0	0	0	0	1	0	0	0	0	0	0
Root; k__Eukaryota; p__Alveolata; c__Ciliophora; o__Intramacronucleata; f__Spirotrichea_None3227	0	0	0	0	0	0	0	0	0	0	0	0	0	1
Root; k__Eukaryota; p__Alveolata; c__Ciliophora; o__Intramacronucleata; f__Spirotrichea_None3228	0	0	0	0	0	0	0	0	3	0	0	0	0	0
Root; k__Eukaryota; p__Alveolata; c__Ciliophora; o__Intramacronucleata; f__Spirotrichea_None3255	0	0	0	0	0	0	0	0	0	0	17	0	0	0
Root; k__Eukaryota; p__Alveolata; c__Ciliophora; o__Intramacronucleata; f__Spirotrichea_None3303	0	0	0	0	0	0	0	0	0	0	0	0	0	1
Root; k__Eukaryota; p__Alveolata; c__Ciliophora; o__Intramacronucleata; f__Spirotrichea_None3309	0	0	0	0	0	0	0	0	0	0	35	0	0	0
Root; k__Eukaryota; p__Alveolata; c__Ciliophora; o__Intramacronucleata; f__Spirotrichea_None3312	0	0	0	0	0	0	0	1	0	0	0	0	0	0
Root; k__Eukaryota; p__Alveolata; c__Ciliophora; o__Intramacronucleata; f__Spirotrichea_None3327	0	0	0	0	0	0	0	0	0	0	0	0	0	2
Root; k__Eukaryota; p__Alveolata; c__Ciliophora; o__Intramacronucleata; f__Spirotrichea_None3390	0	0	0	0	0	0	0	3	0	0	3	3	0	0
Root; k__Eukaryota; p__Alveolata; c__Ciliophora; o__Intramacronucleata; f__Spirotrichea_None3407	0	0	0	0	0	0	0	0	0	0	0	0	0	17
Root; k__Eukaryota; p__Alveolata; c__Ciliophora; o__Intramacronucleata; f__Spirotrichea_None3429	0	1	0	2	0	0	2	0	1	0	0	1	2	0
Root; k__Eukaryota; p__Alveolata; c__Ciliophora; o__Intramacronucleata; f__Spirotrichea_None3431	0	0	0	0	0	0	1	1	1	2	0	5	0	0
Root; k__Eukaryota; p__Alveolata; c__Ciliophora; o__Intramacronucleata; f__Spirotrichea_None3460	0	0	0	0	0	0	0	0	0	0	1	0	0	0
Root; k__Eukaryota; p__Alveolata; c__Ciliophora; o__Intramacronucleata; f__Spirotrichea_None3479	0	1	0	0	0	0	0	1	0	1	1	0	0	0
Root; k__Eukaryota; p__Alveolata; c__Ciliophora; o__Intramacronucleata; f__Spirotrichea_None3502	0	0	0	1	0	0	10	0	0	0	0	0	1	0
Root; k__Eukaryota; p__Alveolata; c__Ciliophora; o__Intramacronucleata; f__Spirotrichea_None3513	0	0	0	0	0	0	1	0	0	2	1	1	0	2
Root; k__Eukaryota; p__Alveolata; c__Ciliophora; o__Intramacronucleata; f__Spirotrichea_None3527	0	0	0	0	0	0	0	0	0	0	1	0	0	0
Root; k__Eukaryota; p__Alveolata; c__Ciliophora; o__Intramacronucleata; f__Spirotrichea_None3529	0	4	0	0	0	0	0	0	0	0	3	0	0	2
Root; k__Eukaryota; p__Alveolata; c__Ciliophora; o__Intramacronucleata; f__Spirotrichea_None353	1	0	0	0	0	0	0	1	2	2	0	64	0	1
Root; k__Eukaryota; p__Alveolata; c__Ciliophora; o__Intramacronucleata; f__Spirotrichea_None3555	0	0	0	0	0	0	3	1	0	0	0	0	0	1
Root; k__Eukaryota; p__Alveolata; c__Ciliophora; o__Intramacronucleata; f__Spirotrichea_None3574	0	0	0	0	0	0	0	0	0	0	0	0	0	11
Root; k__Eukaryota; p__Alveolata; c__Ciliophora; o__Intramacronucleata; f__Spirotrichea_None3588	0	0	0	0	0	0	1	0	9	0	0	0	0	0
Root; k__Eukaryota; p__Alveolata; c__Ciliophora; o__Intramacronucleata; f__Spirotrichea_None360	0	0	0	0	0	0	1	0	0	0	0	1	0	0
Root; k__Eukaryota; p__Alveolata; c__Ciliophora; o__Intramacronucleata; f__Spirotrichea_None3618	0	0	0	0	0	0	0	0	1	2	1	1	0	2
Root; k__Eukaryota; p__Alveolata; c__Ciliophora; o__Intramacronucleata; f__Spirotrichea_None3658	0	0	0	0	0	0	0	0	0	0	2	0	0	0
Root; k__Eukaryota; p__Alveolata; c__Ciliophora; o__Intramacronucleata; f__Spirotrichea_None372	0	0	0	0	0	0	0	0	0	0	1	0	0	0
Root; k__Eukaryota; p__Alveolata; c__Ciliophora; o__Intramacronucleata; f__Spirotrichea_None3727	0	0	0	0	0	0	0	0	0	1	0	0	0	0
Root; k__Eukaryota; p__Alveolata; c__Ciliophora; o__Intramacronucleata; f__Spirotrichea_None3740	0	0	0	0	0	0	0	18	0	0	6	0	0	0
Root; k__Eukaryota; p__Alveolata; c__Ciliophora; o__Intramacronucleata; f__Spirotrichea_None3771	0	0	0	0	0	0	0	0	0	0	0	0	0	242
Root; k__Eukaryota; p__Alveolata; c__Ciliophora; o__Intramacronucleata; f__Spirotrichea_None3790	0	0	0	0	0	0	0	0	0	0	0	0	0	1
Root; k__Eukaryota; p__Alveolata; c__Ciliophora; o__Intramacronucleata; f__Spirotrichea_None3794	0	0	0	0	0	0	0	0	0	0	10	3	0	0
Root; k__Eukaryota; p__Alveolata; c__Ciliophora; o__Intramacronucleata; f__Spirotrichea_None3796	0	0	0	0	0	0	0	0	0	0	0	0	0	8
Root; k__Eukaryota; p__Alveolata; c__Ciliophora; o__Intramacronucleata; f__Spirotrichea_None3806	0	0	0	0	0	0	0	0	0	0	0	0	0	2
Root; k__Eukaryota; p__Alveolata; c__Ciliophora; o__Intramacronucleata; f__Spirotrichea_None3814	0	0	0	0	0	0	0	1	0	0	0	0	0	0
Root; k__Eukaryota; p__Alveolata; c__Ciliophora; o__Intramacronucleata; f__Spirotrichea_None3831	0	0	0	0	0	0	0	0	0	0	0	0	0	84
Root; k__Eukaryota; p__Alveolata; c__Ciliophora; o__Intramacronucleata; f__Spirotrichea_None3847	0	0	0	0	0	0	0	0	0	0	4	1	0	0
Root; k__Eukaryota; p__Alveolata; c__Ciliophora; o__Intramacronucleata; f__Spirotrichea_None3881	0	0	0	0	0	0	0	0	0	0	8	1	0	0
Root; k__Eukaryota; p__Alveolata; c__Ciliophora; o__Intramacronucleata; f__Spirotrichea_None3906	0	0	0	0	0	0	0	0	0	0	0	0	0	3
Root; k__Eukaryota; p__Alveolata; c__Ciliophora; o__Intramacronucleata; f__Spirotrichea_None3909	0	0	0	0	0	0	0	0	0	0	0	0	0	1
Root; k__Eukaryota; p__Alveolata; c__Ciliophora; o__Intramacronucleata; f__Spirotrichea_None3925	0	0	0	0	0	0	0	0	0	0	4	0	0	0
Root; k__Eukaryota; p__Alveolata; c__Ciliophora; o__Intramacronucleata; f__Spirotrichea_None3944	0	0	1	0	0	0	0	0	0	0	0	1	0	0
Root; k__Eukaryota; p__Alveolata; c__Ciliophora; o__Intramacronucleata; f__Spirotrichea_None3952	0	0	0	0	0	0	0	1	0	0	0	1	0	0
Root; k__Eukaryota; p__Alveolata; c__Ciliophora; o__Intramacronucleata; f__Spirotrichea_None3969	0	0	0	0	0	0	0	0	0	0	4	0	0	0
Root; k__Eukaryota; p__Alveolata; c__Ciliophora; o__Intramacronucleata; f__Spirotrichea_None398	0	0	0	0	0	0	0	0	0	0	0	1	0	0
Root; k__Eukaryota; p__Alveolata; c__Ciliophora; o__Intramacronucleata; f__Spirotrichea_None399	0	0	1	0	0	0	3	0	0	0	0	1	0	1
Root; k__Eukaryota; p__Alveolata; c__Ciliophora; o__Intramacronucleata; f__Spirotrichea_None3995	0	0	0	0	0	0	0	0	0	0	3	1	0	60
Root; k__Eukaryota; p__Alveolata; c__Ciliophora; o__Intramacronucleata; f__Spirotrichea_None4026	0	0	0	0	0	0	0	0	0	0	8	0	0	0
Root; k__Eukaryota; p__Alveolata; c__Ciliophora; o__Intramacronucleata; f__Spirotrichea_None4037	0	0	0	0	0	0	0	0	0	0	5	0	0	0
Root; k__Eukaryota; p__Alveolata; c__Ciliophora; o__Intramacronucleata; f__Spirotrichea_None4049	0	0	0	0	0	0	0	1	0	0	0	0	0	0
Root; k__Eukaryota; p__Alveolata; c__Ciliophora; o__Intramacronucleata; f__Spirotrichea_None4066	0	0	0	0	0	0	0	0	0	0	2	0	0	0
Root; k__Eukaryota; p__Alveolata; c__Ciliophora; o__Intramacronucleata; f__Spirotrichea_None4126	0	0	0	0	0	0	0	0	0	1	3	0	0	0
Root; k__Eukaryota; p__Alveolata; c__Ciliophora; o__Intramacronucleata; f__Spirotrichea_None4128	0	0	0	0	0	0	0	0	0	0	0	0	0	16
Root; k__Eukaryota; p__Alveolata; c__Ciliophora; o__Intramacronucleata; f__Spirotrichea_None4265	0	0	0	0	0	0	0	0	0	0	2	0	0	0
Root; k__Eukaryota; p__Alveolata; c__Ciliophora; o__Intramacronucleata; f__Spirotrichea_None4271	0	0	0	0	0	0	0	0	0	0	0	0	0	2
Root; k__Eukaryota; p__Alveolata; c__Ciliophora; o__Intramacronucleata; f__Spirotrichea_None4278	0	0	0	0	0	0	0	0	0	0	0	0	0	23
Root; k__Eukaryota; p__Alveolata; c__Ciliophora; o__Intramacronucleata; f__Spirotrichea_None4285	0	0	0	0	0	0	0	0	0	0	0	48	0	0
Root; k__Eukaryota; p__Alveolata; c__Ciliophora; o__Intramacronucleata; f__Spirotrichea_None4294	0	0	0	0	0	0	0	0	0	0	1	0	0	0
Root; k__Eukaryota; p__Alveolata; c__Ciliophora; o__Intramacronucleata; f__Spirotrichea_None4329	0	0	0	0	0	0	0	1	0	0	2	0	0	0
Root; k__Eukaryota; p__Alveolata; c__Ciliophora; o__Intramacronucleata; f__Spirotrichea_None4354	0	0	0	0	0	0	1	0	0	0	0	0	0	0
Root; k__Eukaryota; p__Alveolata; c__Ciliophora; o__Intramacronucleata; f__Spirotrichea_None4392	0	0	0	0	0	0	0	0	0	0	3	0	0	0
Root; k__Eukaryota; p__Alveolata; c__Ciliophora; o__Intramacronucleata; f__Spirotrichea_None4412	0	0	0	0	0	0	0	0	0	0	1	0	0	0
Root; k__Eukaryota; p__Alveolata; c__Ciliophora; o__Intramacronucleata; f__Spirotrichea_None4464	0	0	0	0	0	0	0	0	0	0	0	0	0	5
Root; k__Eukaryota; p__Alveolata; c__Ciliophora; o__Intramacronucleata; f__Spirotrichea_None4474	0	0	0	0	0	0	0	0	0	0	0	0	0	7
Root; k__Eukaryota; p__Alveolata; c__Ciliophora; o__Intramacronucleata; f__Spirotrichea_None4479	0	0	0	0	0	0	0	0	0	0	8	0	0	0
Root; k__Eukaryota; p__Alveolata; c__Ciliophora; o__Intramacronucleata; f__Spirotrichea_None4484	0	0	0	0	0	0	0	0	0	0	0	0	0	17
Root; k__Eukaryota; p__Alveolata; c__Ciliophora; o__Intramacronucleata; f__Spirotrichea_None4490	0	0	0	0	0	0	2	0	0	4	3	3	0	2
Root; k__Eukaryota; p__Alveolata; c__Ciliophora; o__Intramacronucleata; f__Spirotrichea_None4514	0	0	0	0	0	0	0	0	0	0	1	2	0	0
Root; k__Eukaryota; p__Alveolata; c__Ciliophora; o__Intramacronucleata; f__Spirotrichea_None4526	0	0	0	0	0	0	0	0	0	0	0	0	0	34
Root; k__Eukaryota; p__Alveolata; c__Ciliophora; o__Intramacronucleata; f__Spirotrichea_None4539	0	0	0	0	0	0	0	0	0	0	0	0	0	19
Root; k__Eukaryota; p__Alveolata; c__Ciliophora; o__Intramacronucleata; f__Spirotrichea_None4548	0	0	0	0	0	0	2	0	4	0	0	0	0	0
Root; k__Eukaryota; p__Alveolata; c__Ciliophora; o__Intramacronucleata; f__Spirotrichea_None4551	0	0	0	0	0	0	0	0	0	0	0	0	0	8
Root; k__Eukaryota; p__Alveolata; c__Ciliophora; o__Intramacronucleata; f__Spirotrichea_None4554	0	0	0	0	0	0	0	0	0	0	0	0	0	8
Root; k__Eukaryota; p__Alveolata; c__Ciliophora; o__Intramacronucleata; f__Spirotrichea_None4689	0	0	0	0	0	0	0	0	0	0	1	0	0	0
Root; k__Eukaryota; p__Alveolata; c__Ciliophora; o__Intramacronucleata; f__Spirotrichea_None4719	0	0	0	0	0	0	0	0	0	1	0	0	0	0
Root; k__Eukaryota; p__Alveolata; c__Ciliophora; o__Intramacronucleata; f__Spirotrichea_None4774	0	0	0	0	0	0	0	2	1	0	1	0	0	0
Root; k__Eukaryota; p__Alveolata; c__Ciliophora; o__Intramacronucleata; f__Spirotrichea_None4786	0	0	0	0	4	1	2	10	6	0	8	1	0	8
Root; k__Eukaryota; p__Alveolata; c__Ciliophora; o__Intramacronucleata; f__Spirotrichea_None4823	0	0	0	1	0	1	5	13	0	0	11	17	0	0
Root; k__Eukaryota; p__Alveolata; c__Ciliophora; o__Intramacronucleata; f__Spirotrichea_None4836	0	0	0	0	0	0	0	0	0	0	1	1	0	0
Root; k__Eukaryota; p__Alveolata; c__Ciliophora; o__Intramacronucleata; f__Spirotrichea_None485	0	0	0	0	0	0	0	0	0	0	0	0	0	24
Root; k__Eukaryota; p__Alveolata; c__Ciliophora; o__Intramacronucleata; f__Spirotrichea_None4861	0	0	0	0	0	0	0	0	0	0	0	0	0	1
Root; k__Eukaryota; p__Alveolata; c__Ciliophora; o__Intramacronucleata; f__Spirotrichea_None4911	0	0	0	0	0	0	0	0	1	0	1	0	0	0
Root; k__Eukaryota; p__Alveolata; c__Ciliophora; o__Intramacronucleata; f__Spirotrichea_None4924	0	0	0	0	0	0	0	0	0	0	1	0	0	0
Root; k__Eukaryota; p__Alveolata; c__Ciliophora; o__Intramacronucleata; f__Spirotrichea_None4942	0	0	0	0	0	0	1	0	0	0	0	0	0	0
Root; k__Eukaryota; p__Alveolata; c__Ciliophora; o__Intramacronucleata; f__Spirotrichea_None4950	0	0	0	0	0	0	0	0	2	0	0	0	0	0
Root; k__Eukaryota; p__Alveolata; c__Ciliophora; o__Intramacronucleata; f__Spirotrichea_None497	0	0	0	0	0	0	0	0	0	0	0	0	1	0
Root; k__Eukaryota; p__Alveolata; c__Ciliophora; o__Intramacronucleata; f__Spirotrichea_None5007	0	0	0	0	0	0	13	3	5	1	2	4	0	0
Root; k__Eukaryota; p__Alveolata; c__Ciliophora; o__Intramacronucleata; f__Spirotrichea_None5015	0	0	0	0	0	0	0	0	0	0	1	0	1	0
Root; k__Eukaryota; p__Alveolata; c__Ciliophora; o__Intramacronucleata; f__Spirotrichea_None5016	0	0	0	0	0	0	0	0	0	0	2	0	0	0
Root; k__Eukaryota; p__Alveolata; c__Ciliophora; o__Intramacronucleata; f__Spirotrichea_None5059	0	0	0	0	0	0	0	0	0	0	0	0	0	2
Root; k__Eukaryota; p__Alveolata; c__Ciliophora; o__Intramacronucleata; f__Spirotrichea_None5065	0	0	0	0	0	0	0	0	0	0	2	3	0	0
Root; k__Eukaryota; p__Alveolata; c__Ciliophora; o__Intramacronucleata; f__Spirotrichea_None5066	0	0	0	0	0	0	0	0	0	0	0	0	0	58
Root; k__Eukaryota; p__Alveolata; c__Ciliophora; o__Intramacronucleata; f__Spirotrichea_None5067	0	0	0	0	0	0	0	0	0	0	0	0	0	7
Root; k__Eukaryota; p__Alveolata; c__Ciliophora; o__Intramacronucleata; f__Spirotrichea_None5091	0	0	0	0	0	0	0	0	0	0	0	0	0	25
Root; k__Eukaryota; p__Alveolata; c__Ciliophora; o__Intramacronucleata; f__Spirotrichea_None5137	0	0	0	0	0	0	8	0	0	0	0	1	0	0
Root; k__Eukaryota; p__Alveolata; c__Ciliophora; o__Intramacronucleata; f__Spirotrichea_None5174	0	0	0	0	0	0	0	0	0	0	0	0	0	3
Root; k__Eukaryota; p__Alveolata; c__Ciliophora; o__Intramacronucleata; f__Spirotrichea_None5198	0	0	0	0	0	0	0	0	0	0	0	125	0	0
Root; k__Eukaryota; p__Alveolata; c__Ciliophora; o__Intramacronucleata; f__Spirotrichea_None5211	0	0	0	0	0	0	0	0	0	0	1	0	0	6
Root; k__Eukaryota; p__Alveolata; c__Ciliophora; o__Intramacronucleata; f__Spirotrichea_None5236	0	0	0	0	0	0	0	0	0	0	0	0	0	3
Root; k__Eukaryota; p__Alveolata; c__Ciliophora; o__Intramacronucleata; f__Spirotrichea_None525	0	0	0	0	0	0	0	0	0	0	0	0	0	22
Root; k__Eukaryota; p__Alveolata; c__Ciliophora; o__Intramacronucleata; f__Spirotrichea_None5286	0	0	0	0	0	0	0	0	0	0	0	0	0	1
Root; k__Eukaryota; p__Alveolata; c__Ciliophora; o__Intramacronucleata; f__Spirotrichea_None5289	0	0	0	0	0	0	0	0	0	0	0	0	0	4
Root; k__Eukaryota; p__Alveolata; c__Ciliophora; o__Intramacronucleata; f__Spirotrichea_None53	0	0	0	0	0	0	0	0	0	6	0	2	0	0
Root; k__Eukaryota; p__Alveolata; c__Ciliophora; o__Intramacronucleata; f__Spirotrichea_None5315	0	0	0	0	0	0	0	0	0	0	2	0	0	0
Root; k__Eukaryota; p__Alveolata; c__Ciliophora; o__Intramacronucleata; f__Spirotrichea_None5324	0	0	0	0	0	0	0	0	0	0	2	0	0	0
Root; k__Eukaryota; p__Alveolata; c__Ciliophora; o__Intramacronucleata; f__Spirotrichea_None5350	0	0	0	0	0	0	1	3	1	0	0	4	0	0
Root; k__Eukaryota; p__Alveolata; c__Ciliophora; o__Intramacronucleata; f__Spirotrichea_None5360	0	0	0	0	0	0	0	0	0	0	0	1	0	0
Root; k__Eukaryota; p__Alveolata; c__Ciliophora; o__Intramacronucleata; f__Spirotrichea_None5364	0	0	0	0	0	0	0	0	0	0	0	0	0	2
Root; k__Eukaryota; p__Alveolata; c__Ciliophora; o__Intramacronucleata; f__Spirotrichea_None543	0	0	0	0	0	0	0	0	1	0	0	0	0	1
Root; k__Eukaryota; p__Alveolata; c__Ciliophora; o__Intramacronucleata; f__Spirotrichea_None5455	0	0	0	0	0	0	0	0	0	0	0	0	0	102
Root; k__Eukaryota; p__Alveolata; c__Ciliophora; o__Intramacronucleata; f__Spirotrichea_None5486	0	0	0	0	0	0	1	0	0	0	0	0	0	0
Root; k__Eukaryota; p__Alveolata; c__Ciliophora; o__Intramacronucleata; f__Spirotrichea_None5532	0	0	0	0	0	0	0	3	0	0	4	0	0	4
Root; k__Eukaryota; p__Alveolata; c__Ciliophora; o__Intramacronucleata; f__Spirotrichea_None554	0	0	0	0	0	0	0	0	0	0	0	0	0	3
Root; k__Eukaryota; p__Alveolata; c__Ciliophora; o__Intramacronucleata; f__Spirotrichea_None5547	0	0	0	0	0	0	0	0	0	0	0	0	5	500
Root; k__Eukaryota; p__Alveolata; c__Ciliophora; o__Intramacronucleata; f__Spirotrichea_None5568	0	0	0	0	0	0	0	0	0	7	0	0	0	0
Root; k__Eukaryota; p__Alveolata; c__Ciliophora; o__Intramacronucleata; f__Spirotrichea_None5575	0	0	0	0	1	0	5	5	2	7	4	0	0	0
Root; k__Eukaryota; p__Alveolata; c__Ciliophora; o__Intramacronucleata; f__Spirotrichea_None5586	0	0	0	0	0	0	0	0	0	0	0	0	0	184
Root; k__Eukaryota; p__Alveolata; c__Ciliophora; o__Intramacronucleata; f__Spirotrichea_None5589	0	0	0	0	0	0	0	1	0	0	0	0	0	0
Root; k__Eukaryota; p__Alveolata; c__Ciliophora; o__Intramacronucleata; f__Spirotrichea_None5614	0	0	0	0	0	0	0	0	0	0	0	0	0	2
Root; k__Eukaryota; p__Alveolata; c__Ciliophora; o__Intramacronucleata; f__Spirotrichea_None5627	0	0	0	0	0	0	0	0	0	0	0	4	0	0
Root; k__Eukaryota; p__Alveolata; c__Ciliophora; o__Intramacronucleata; f__Spirotrichea_None5663	0	0	0	0	0	0	0	0	0	0	1	0	0	0
Root; k__Eukaryota; p__Alveolata; c__Ciliophora; o__Intramacronucleata; f__Spirotrichea_None5672	0	1	0	0	0	0	0	0	0	0	0	0	0	0
Root; k__Eukaryota; p__Alveolata; c__Ciliophora; o__Intramacronucleata; f__Spirotrichea_None5695	0	0	0	0	0	0	0	0	0	0	0	0	0	145
Root; k__Eukaryota; p__Alveolata; c__Ciliophora; o__Intramacronucleata; f__Spirotrichea_None57	0	0	0	0	0	0	0	0	0	3	0	3	0	0
Root; k__Eukaryota; p__Alveolata; c__Ciliophora; o__Intramacronucleata; f__Spirotrichea_None5760	0	0	0	0	0	0	0	3	0	0	0	0	0	0
Root; k__Eukaryota; p__Alveolata; c__Ciliophora; o__Intramacronucleata; f__Spirotrichea_None5860	0	0	0	0	0	0	0	0	0	0	0	0	0	14
Root; k__Eukaryota; p__Alveolata; c__Ciliophora; o__Intramacronucleata; f__Spirotrichea_None5865	0	0	0	0	0	0	0	0	0	0	12	9	0	0
Root; k__Eukaryota; p__Alveolata; c__Ciliophora; o__Intramacronucleata; f__Spirotrichea_None5881	0	0	0	0	0	0	0	0	0	0	0	0	8	1334
Root; k__Eukaryota; p__Alveolata; c__Ciliophora; o__Intramacronucleata; f__Spirotrichea_None5882	0	0	0	0	0	0	0	0	0	2	6	0	0	0
Root; k__Eukaryota; p__Alveolata; c__Ciliophora; o__Intramacronucleata; f__Spirotrichea_None5888	0	0	0	0	0	0	0	0	0	0	0	0	0	1
Root; k__Eukaryota; p__Alveolata; c__Ciliophora; o__Intramacronucleata; f__Spirotrichea_None5908	0	0	0	0	0	0	0	0	0	0	6	2	7	0
Root; k__Eukaryota; p__Alveolata; c__Ciliophora; o__Intramacronucleata; f__Spirotrichea_None5914	0	0	0	0	0	1	4	1	0	0	0	1	0	0
Root; k__Eukaryota; p__Alveolata; c__Ciliophora; o__Intramacronucleata; f__Spirotrichea_None5926	0	0	0	0	0	0	4	0	0	0	0	0	0	0
Root; k__Eukaryota; p__Alveolata; c__Ciliophora; o__Intramacronucleata; f__Spirotrichea_None5961	0	0	0	0	0	0	0	0	0	0	0	0	0	3
Root; k__Eukaryota; p__Alveolata; c__Ciliophora; o__Intramacronucleata; f__Spirotrichea_None5998	0	0	0	0	0	0	1	0	0	0	0	0	0	0
Root; k__Eukaryota; p__Alveolata; c__Ciliophora; o__Intramacronucleata; f__Spirotrichea_None6043	0	0	0	0	0	0	0	0	0	0	0	0	0	20
Root; k__Eukaryota; p__Alveolata; c__Ciliophora; o__Intramacronucleata; f__Spirotrichea_None6115	0	0	0	0	0	0	8	0	0	0	0	0	0	0
Root; k__Eukaryota; p__Alveolata; c__Ciliophora; o__Intramacronucleata; f__Spirotrichea_None6125	0	0	0	0	0	0	0	0	0	0	0	44	0	0
Root; k__Eukaryota; p__Alveolata; c__Ciliophora; o__Intramacronucleata; f__Spirotrichea_None613	0	0	0	0	0	0	0	0	0	0	0	6	0	11
Root; k__Eukaryota; p__Alveolata; c__Ciliophora; o__Intramacronucleata; f__Spirotrichea_None6168	0	0	0	0	0	0	0	0	0	0	0	0	0	3
Root; k__Eukaryota; p__Alveolata; c__Ciliophora; o__Intramacronucleata; f__Spirotrichea_None617	0	0	0	0	0	0	0	5	1	0	0	1	0	0
Root; k__Eukaryota; p__Alveolata; c__Ciliophora; o__Intramacronucleata; f__Spirotrichea_None6197	0	0	0	0	0	0	0	0	0	0	0	2	0	0
Root; k__Eukaryota; p__Alveolata; c__Ciliophora; o__Intramacronucleata; f__Spirotrichea_None6233	0	0	0	0	0	0	0	0	0	0	0	0	0	65
Root; k__Eukaryota; p__Alveolata; c__Ciliophora; o__Intramacronucleata; f__Spirotrichea_None6319	0	0	0	0	1	0	1	1	1	4	0	0	0	2
Root; k__Eukaryota; p__Alveolata; c__Ciliophora; o__Intramacronucleata; f__Spirotrichea_None6340	0	0	0	0	0	0	0	0	0	0	1	0	0	0
Root; k__Eukaryota; p__Alveolata; c__Ciliophora; o__Intramacronucleata; f__Spirotrichea_None6373	0	0	0	0	0	0	0	1	0	0	2	0	0	0
Root; k__Eukaryota; p__Alveolata; c__Ciliophora; o__Intramacronucleata; f__Spirotrichea_None6386	0	0	0	0	0	0	0	0	0	0	1	0	0	0
Root; k__Eukaryota; p__Alveolata; c__Ciliophora; o__Intramacronucleata; f__Spirotrichea_None6451	0	0	0	0	0	0	0	0	0	0	0	0	0	12
Root; k__Eukaryota; p__Alveolata; c__Ciliophora; o__Intramacronucleata; f__Spirotrichea_None6485	0	0	0	0	0	0	0	0	0	0	6	22	0	0
Root; k__Eukaryota; p__Alveolata; c__Ciliophora; o__Intramacronucleata; f__Spirotrichea_None6490	0	0	0	0	0	0	0	0	0	0	0	0	0	14
Root; k__Eukaryota; p__Alveolata; c__Ciliophora; o__Intramacronucleata; f__Spirotrichea_None6493	0	0	0	0	0	0	0	0	0	0	0	0	0	10
Root; k__Eukaryota; p__Alveolata; c__Ciliophora; o__Intramacronucleata; f__Spirotrichea_None6494	0	0	0	0	0	0	0	0	0	0	1	0	0	0
Root; k__Eukaryota; p__Alveolata; c__Ciliophora; o__Intramacronucleata; f__Spirotrichea_None6503	0	0	0	0	0	0	0	0	0	1	2	0	0	0
Root; k__Eukaryota; p__Alveolata; c__Ciliophora; o__Intramacronucleata; f__Spirotrichea_None6532	0	0	0	0	0	0	0	0	0	0	23	326	1	0
Root; k__Eukaryota; p__Alveolata; c__Ciliophora; o__Intramacronucleata; f__Spirotrichea_None6549	0	0	0	0	0	0	0	0	0	0	0	0	0	1
Root; k__Eukaryota; p__Alveolata; c__Ciliophora; o__Intramacronucleata; f__Spirotrichea_None6560	0	0	0	0	0	0	0	2	0	0	0	0	0	0
Root; k__Eukaryota; p__Alveolata; c__Ciliophora; o__Intramacronucleata; f__Spirotrichea_None6568	0	0	0	0	0	0	0	0	0	0	1	0	0	0
Root; k__Eukaryota; p__Alveolata; c__Ciliophora; o__Intramacronucleata; f__Spirotrichea_None6595	0	0	0	0	0	0	0	0	0	0	0	0	0	2
Root; k__Eukaryota; p__Alveolata; c__Ciliophora; o__Intramacronucleata; f__Spirotrichea_None6610	0	0	0	0	0	0	0	0	0	0	1	0	0	0
Root; k__Eukaryota; p__Alveolata; c__Ciliophora; o__Intramacronucleata; f__Spirotrichea_None6611	0	0	0	0	0	0	1	0	0	0	1	5	0	4
Root; k__Eukaryota; p__Alveolata; c__Ciliophora; o__Intramacronucleata; f__Spirotrichea_None6628	0	0	0	0	0	0	0	1	2	0	0	0	0	0
Root; k__Eukaryota; p__Alveolata; c__Ciliophora; o__Intramacronucleata; f__Spirotrichea_None6630	0	0	0	0	0	0	0	0	0	0	0	0	0	3
Root; k__Eukaryota; p__Alveolata; c__Ciliophora; o__Intramacronucleata; f__Spirotrichea_None6633	0	0	0	0	0	0	0	0	0	0	0	0	0	1
Root; k__Eukaryota; p__Alveolata; c__Ciliophora; o__Intramacronucleata; f__Spirotrichea_None6662	0	0	0	0	0	0	1	0	0	2	1	0	0	0
Root; k__Eukaryota; p__Alveolata; c__Ciliophora; o__Intramacronucleata; f__Spirotrichea_None6673	0	0	0	0	0	0	0	0	1	0	0	0	0	0
Root; k__Eukaryota; p__Alveolata; c__Ciliophora; o__Intramacronucleata; f__Spirotrichea_None6680	0	0	0	0	0	0	0	0	0	0	7	1	0	0
Root; k__Eukaryota; p__Alveolata; c__Ciliophora; o__Intramacronucleata; f__Spirotrichea_None6719	0	0	0	0	0	0	0	0	0	0	1	0	0	0
Root; k__Eukaryota; p__Alveolata; c__Ciliophora; o__Intramacronucleata; f__Spirotrichea_None672	0	0	0	0	0	0	0	0	0	0	0	0	0	15
Root; k__Eukaryota; p__Alveolata; c__Ciliophora; o__Intramacronucleata; f__Spirotrichea_None6730	0	0	0	0	0	0	0	0	0	0	6	7	0	0
Root; k__Eukaryota; p__Alveolata; c__Ciliophora; o__Intramacronucleata; f__Spirotrichea_None6740	0	0	0	0	0	0	0	0	0	1	0	0	0	0
Root; k__Eukaryota; p__Alveolata; c__Ciliophora; o__Intramacronucleata; f__Spirotrichea_None6746	0	0	0	0	0	0	0	0	0	0	5	32	0	0
Root; k__Eukaryota; p__Alveolata; c__Ciliophora; o__Intramacronucleata; f__Spirotrichea_None6754	0	0	0	0	0	0	0	0	0	0	0	0	0	175
Root; k__Eukaryota; p__Alveolata; c__Ciliophora; o__Intramacronucleata; f__Spirotrichea_None6779	0	0	0	0	0	0	0	0	0	0	0	0	0	5
Root; k__Eukaryota; p__Alveolata; c__Ciliophora; o__Intramacronucleata; f__Spirotrichea_None6782	0	0	0	0	0	0	0	0	0	0	10	0	0	0
Root; k__Eukaryota; p__Alveolata; c__Ciliophora; o__Intramacronucleata; f__Spirotrichea_None6800	0	0	0	0	0	0	0	0	0	0	0	0	0	8
Root; k__Eukaryota; p__Alveolata; c__Ciliophora; o__Intramacronucleata; f__Spirotrichea_None6804	0	0	1	0	0	0	2	1	1	50	28	1	0	0
Root; k__Eukaryota; p__Alveolata; c__Ciliophora; o__Intramacronucleata; f__Spirotrichea_None6826	0	0	0	0	0	0	0	0	0	0	0	0	0	47
Root; k__Eukaryota; p__Alveolata; c__Ciliophora; o__Intramacronucleata; f__Spirotrichea_None6848	0	0	0	0	0	0	1	0	0	0	0	0	0	0
Root; k__Eukaryota; p__Alveolata; c__Ciliophora; o__Intramacronucleata; f__Spirotrichea_None6880	0	0	0	0	0	0	0	0	0	0	1	1	0	0
Root; k__Eukaryota; p__Alveolata; c__Ciliophora; o__Intramacronucleata; f__Spirotrichea_None6881	0	0	0	0	0	0	0	0	0	0	0	1	0	25
Root; k__Eukaryota; p__Alveolata; c__Ciliophora; o__Intramacronucleata; f__Spirotrichea_None6889	0	0	0	0	0	0	0	0	0	0	1	0	0	0
Root; k__Eukaryota; p__Alveolata; c__Ciliophora; o__Intramacronucleata; f__Spirotrichea_None6910	0	0	0	0	0	0	0	1	0	0	1	0	0	0
Root; k__Eukaryota; p__Alveolata; c__Ciliophora; o__Intramacronucleata; f__Spirotrichea_None6921	0	0	0	0	0	0	0	0	0	0	0	1	0	0
Root; k__Eukaryota; p__Alveolata; c__Ciliophora; o__Intramacronucleata; f__Spirotrichea_None6948	0	0	0	0	0	0	0	0	0	0	1	0	0	0
Root; k__Eukaryota; p__Alveolata; c__Ciliophora; o__Intramacronucleata; f__Spirotrichea_None7012	0	0	0	0	0	4	14	0	0	0	0	0	0	0
Root; k__Eukaryota; p__Alveolata; c__Ciliophora; o__Intramacronucleata; f__Spirotrichea_None7039	0	0	0	0	0	0	0	0	0	0	0	2	0	0
Root; k__Eukaryota; p__Alveolata; c__Ciliophora; o__Intramacronucleata; f__Spirotrichea_None7060	0	0	0	0	1	0	0	0	0	0	0	0	0	0
Root; k__Eukaryota; p__Alveolata; c__Ciliophora; o__Intramacronucleata; f__Spirotrichea_None7085	0	0	0	0	0	0	3	0	0	2	1	0	0	3
Root; k__Eukaryota; p__Alveolata; c__Ciliophora; o__Intramacronucleata; f__Spirotrichea_None7097	0	0	0	0	0	0	0	1	0	0	0	0	0	0
Root; k__Eukaryota; p__Alveolata; c__Ciliophora; o__Intramacronucleata; f__Spirotrichea_None712	0	0	0	0	0	0	0	0	0	0	0	0	0	23
Root; k__Eukaryota; p__Alveolata; c__Ciliophora; o__Intramacronucleata; f__Spirotrichea_None7136	0	0	0	0	0	0	0	0	0	0	0	0	0	55
Root; k__Eukaryota; p__Alveolata; c__Ciliophora; o__Intramacronucleata; f__Spirotrichea_None7171	0	0	0	0	0	0	0	0	0	0	0	0	0	28
Root; k__Eukaryota; p__Alveolata; c__Ciliophora; o__Intramacronucleata; f__Spirotrichea_None7179	0	0	0	0	0	0	0	0	1	0	0	0	0	0
Root; k__Eukaryota; p__Alveolata; c__Ciliophora; o__Intramacronucleata; f__Spirotrichea_None7188	0	0	0	0	0	0	1	0	0	0	0	0	0	0
Root; k__Eukaryota; p__Alveolata; c__Ciliophora; o__Intramacronucleata; f__Spirotrichea_None7194	0	1	0	4	0	0	3	1	0	0	0	4	0	0
Root; k__Eukaryota; p__Alveolata; c__Ciliophora; o__Intramacronucleata; f__Spirotrichea_None7197	0	0	0	0	0	0	0	1	0	0	0	0	0	0
Root; k__Eukaryota; p__Alveolata; c__Ciliophora; o__Intramacronucleata; f__Spirotrichea_None7227	0	0	0	0	0	0	0	1	0	0	0	0	0	69
Root; k__Eukaryota; p__Alveolata; c__Ciliophora; o__Intramacronucleata; f__Spirotrichea_None7234	0	0	0	0	0	0	0	0	0	0	0	0	0	7
Root; k__Eukaryota; p__Alveolata; c__Ciliophora; o__Intramacronucleata; f__Spirotrichea_None7247	0	0	0	0	0	0	0	0	0	0	0	0	0	1
Root; k__Eukaryota; p__Alveolata; c__Ciliophora; o__Intramacronucleata; f__Spirotrichea_None7249	0	0	0	0	0	0	0	0	0	0	1	0	0	0
Root; k__Eukaryota; p__Alveolata; c__Ciliophora; o__Intramacronucleata; f__Spirotrichea_None7258	0	0	2	0	0	0	0	1	10	0	4	0	0	0
Root; k__Eukaryota; p__Alveolata; c__Ciliophora; o__Intramacronucleata; f__Spirotrichea_None7265	0	0	0	0	0	0	2	0	4	0	0	0	0	0
Root; k__Eukaryota; p__Alveolata; c__Ciliophora; o__Intramacronucleata; f__Spirotrichea_None7322	0	0	0	0	0	0	0	0	0	0	0	0	0	17
Root; k__Eukaryota; p__Alveolata; c__Ciliophora; o__Intramacronucleata; f__Spirotrichea_None7333	0	0	0	0	0	0	0	0	0	0	0	0	0	7
Root; k__Eukaryota; p__Alveolata; c__Ciliophora; o__Intramacronucleata; f__Spirotrichea_None7359	0	0	0	0	0	0	0	0	0	0	0	0	0	6
Root; k__Eukaryota; p__Alveolata; c__Ciliophora; o__Intramacronucleata; f__Spirotrichea_None7392	0	0	0	0	0	0	0	0	0	8	34	47	1	0
Root; k__Eukaryota; p__Alveolata; c__Ciliophora; o__Intramacronucleata; f__Spirotrichea_None7413	0	0	0	0	0	0	0	0	0	0	0	0	0	373
Root; k__Eukaryota; p__Alveolata; c__Ciliophora; o__Intramacronucleata; f__Spirotrichea_None7435	0	0	0	0	0	0	0	0	0	0	1	7	0	0
Root; k__Eukaryota; p__Alveolata; c__Ciliophora; o__Intramacronucleata; f__Spirotrichea_None7457	0	0	0	0	0	0	0	0	0	0	4	14	0	1
Root; k__Eukaryota; p__Alveolata; c__Ciliophora; o__Intramacronucleata; f__Spirotrichea_None7458	0	0	0	0	0	0	0	0	0	0	0	0	0	32
Root; k__Eukaryota; p__Alveolata; c__Ciliophora; o__Intramacronucleata; f__Spirotrichea_None7495	0	0	0	0	0	0	0	0	0	0	0	0	0	17
Root; k__Eukaryota; p__Alveolata; c__Ciliophora; o__Intramacronucleata; f__Spirotrichea_None7514	0	1	0	0	0	0	1	0	0	0	2	3	0	2
Root; k__Eukaryota; p__Alveolata; c__Ciliophora; o__Intramacronucleata; f__Spirotrichea_None7553	0	0	0	0	0	0	0	0	0	0	0	0	0	2
Root; k__Eukaryota; p__Alveolata; c__Ciliophora; o__Intramacronucleata; f__Spirotrichea_None7617	0	0	0	0	0	0	0	0	0	0	0	0	0	1
Root; k__Eukaryota; p__Alveolata; c__Ciliophora; o__Intramacronucleata; f__Spirotrichea_None7670	0	0	0	0	0	0	0	0	0	0	1	0	0	0
Root; k__Eukaryota; p__Alveolata; c__Ciliophora; o__Intramacronucleata; f__Spirotrichea_None7722	0	0	0	0	0	0	0	0	0	0	0	0	0	19
Root; k__Eukaryota; p__Alveolata; c__Ciliophora; o__Intramacronucleata; f__Spirotrichea_None773	0	0	0	0	0	0	1	0	0	0	0	0	0	1
Root; k__Eukaryota; p__Alveolata; c__Ciliophora; o__Intramacronucleata; f__Spirotrichea_None7766	0	0	0	0	0	0	0	0	0	0	0	0	0	28
Root; k__Eukaryota; p__Alveolata; c__Ciliophora; o__Intramacronucleata; f__Spirotrichea_None7779	0	0	0	0	0	0	0	0	0	0	0	0	0	2
Root; k__Eukaryota; p__Alveolata; c__Ciliophora; o__Intramacronucleata; f__Spirotrichea_None7786	0	0	0	0	0	0	0	0	0	0	2	1	0	0
Root; k__Eukaryota; p__Alveolata; c__Ciliophora; o__Intramacronucleata; f__Spirotrichea_None7813	0	0	0	0	0	0	0	2	0	0	4	1	0	0
Root; k__Eukaryota; p__Alveolata; c__Ciliophora; o__Intramacronucleata; f__Spirotrichea_None7814	0	0	0	0	0	0	0	0	0	0	2	2	0	0
Root; k__Eukaryota; p__Alveolata; c__Ciliophora; o__Intramacronucleata; f__Spirotrichea_None7846	0	0	0	0	0	0	0	0	0	0	2	1	0	0
Root; k__Eukaryota; p__Alveolata; c__Ciliophora; o__Intramacronucleata; f__Spirotrichea_None7847	0	0	0	0	0	0	0	0	0	0	0	0	0	11
Root; k__Eukaryota; p__Alveolata; c__Ciliophora; o__Intramacronucleata; f__Spirotrichea_None7851	0	0	0	0	0	0	0	1	0	0	0	3	0	0
Root; k__Eukaryota; p__Alveolata; c__Ciliophora; o__Intramacronucleata; f__Spirotrichea_None7860	0	0	0	0	0	0	0	0	0	0	6	1	0	0
Root; k__Eukaryota; p__Alveolata; c__Ciliophora; o__Intramacronucleata; f__Spirotrichea_None7874	0	0	0	0	0	0	0	0	0	0	1	1	0	0
Root; k__Eukaryota; p__Alveolata; c__Ciliophora; o__Intramacronucleata; f__Spirotrichea_None790	0	0	0	0	0	0	0	0	0	0	3	3	0	0
Root; k__Eukaryota; p__Alveolata; c__Ciliophora; o__Intramacronucleata; f__Spirotrichea_None7901	0	0	0	0	0	0	0	3	0	1	0	0	0	2
Root; k__Eukaryota; p__Alveolata; c__Ciliophora; o__Intramacronucleata; f__Spirotrichea_None7918	0	0	0	0	0	0	0	0	0	0	2	0	0	0
Root; k__Eukaryota; p__Alveolata; c__Ciliophora; o__Intramacronucleata; f__Spirotrichea_None800	0	0	0	0	0	0	0	0	0	0	0	0	0	1
Root; k__Eukaryota; p__Alveolata; c__Ciliophora; o__Intramacronucleata; f__Spirotrichea_None8035	0	0	0	0	0	0	0	0	0	0	0	0	0	2
Root; k__Eukaryota; p__Alveolata; c__Ciliophora; o__Intramacronucleata; f__Spirotrichea_None8112	0	0	0	0	0	0	0	0	0	0	1	0	0	0
Root; k__Eukaryota; p__Alveolata; c__Ciliophora; o__Intramacronucleata; f__Spirotrichea_None8115	0	0	0	0	0	0	0	0	0	2	0	0	0	0
Root; k__Eukaryota; p__Alveolata; c__Ciliophora; o__Intramacronucleata; f__Spirotrichea_None8116	0	0	0	0	1	0	0	3	0	0	1	0	0	0
Root; k__Eukaryota; p__Alveolata; c__Ciliophora; o__Intramacronucleata; f__Spirotrichea_None819	0	0	0	0	0	0	0	1	0	0	0	0	0	0
Root; k__Eukaryota; p__Alveolata; c__Ciliophora; o__Intramacronucleata; f__Spirotrichea_None8237	0	0	0	0	0	0	0	0	0	0	2	0	0	0
Root; k__Eukaryota; p__Alveolata; c__Ciliophora; o__Intramacronucleata; f__Spirotrichea_None8262	0	0	0	0	0	0	0	0	0	0	1	4	0	0
Root; k__Eukaryota; p__Alveolata; c__Ciliophora; o__Intramacronucleata; f__Spirotrichea_None8288	0	0	0	0	0	0	0	0	0	0	0	0	0	4
Root; k__Eukaryota; p__Alveolata; c__Ciliophora; o__Intramacronucleata; f__Spirotrichea_None83	0	0	0	0	0	0	0	0	0	0	4	79	0	0
Root; k__Eukaryota; p__Alveolata; c__Ciliophora; o__Intramacronucleata; f__Spirotrichea_None8300	0	0	0	0	0	0	0	0	0	0	0	0	0	1
Root; k__Eukaryota; p__Alveolata; c__Ciliophora; o__Intramacronucleata; f__Spirotrichea_None8308	0	0	0	0	0	0	4	0	0	0	0	0	0	0
Root; k__Eukaryota; p__Alveolata; c__Ciliophora; o__Intramacronucleata; f__Spirotrichea_None8317	0	0	0	0	0	0	0	0	0	0	0	0	0	4
Root; k__Eukaryota; p__Alveolata; c__Ciliophora; o__Intramacronucleata; f__Spirotrichea_None8323	0	0	0	0	0	0	0	0	0	0	1	1	0	0
Root; k__Eukaryota; p__Alveolata; c__Ciliophora; o__Intramacronucleata; f__Spirotrichea_None8337	0	0	0	0	0	0	0	0	0	1	0	0	0	0
Root; k__Eukaryota; p__Alveolata; c__Ciliophora; o__Intramacronucleata; f__Spirotrichea_None8359	0	0	0	0	0	0	2	0	0	0	1	1	0	0
Root; k__Eukaryota; p__Alveolata; c__Ciliophora; o__Intramacronucleata; f__Spirotrichea_None8368	0	0	0	0	0	0	0	1	0	0	2	0	0	0
Root; k__Eukaryota; p__Alveolata; c__Ciliophora; o__Intramacronucleata; f__Spirotrichea_None8384	0	0	0	0	0	0	0	0	0	0	5	1	0	0
Root; k__Eukaryota; p__Alveolata; c__Ciliophora; o__Intramacronucleata; f__Spirotrichea_None8394	0	0	0	0	0	0	0	0	0	0	3	3	0	0
Root; k__Eukaryota; p__Alveolata; c__Ciliophora; o__Intramacronucleata; f__Spirotrichea_None8419	0	0	0	0	0	0	0	0	0	0	1	0	0	0
Root; k__Eukaryota; p__Alveolata; c__Ciliophora; o__Intramacronucleata; f__Spirotrichea_None8447	0	0	0	0	0	0	0	0	0	0	3	1	1	0
Root; k__Eukaryota; p__Alveolata; c__Ciliophora; o__Intramacronucleata; f__Spirotrichea_None8449	0	0	0	0	0	0	0	0	0	0	0	0	0	57
Root; k__Eukaryota; p__Alveolata; c__Ciliophora; o__Intramacronucleata; f__Spirotrichea_None845	0	0	0	0	0	0	0	0	0	0	0	0	0	1
Root; k__Eukaryota; p__Alveolata; c__Ciliophora; o__Intramacronucleata; f__Spirotrichea_None8453	0	0	0	0	0	0	0	0	0	0	0	0	0	1
Root; k__Eukaryota; p__Alveolata; c__Ciliophora; o__Intramacronucleata; f__Spirotrichea_None8475	0	0	0	0	0	0	0	0	0	0	0	0	0	90
Root; k__Eukaryota; p__Alveolata; c__Ciliophora; o__Intramacronucleata; f__Spirotrichea_None8482	0	0	0	0	0	0	0	0	0	10	0	1	0	0
Root; k__Eukaryota; p__Alveolata; c__Ciliophora; o__Intramacronucleata; f__Spirotrichea_None850	0	0	0	0	0	0	0	0	0	0	0	0	0	4
Root; k__Eukaryota; p__Alveolata; c__Ciliophora; o__Intramacronucleata; f__Spirotrichea_None8536	0	0	0	0	0	0	1	1	0	6	3	11	0	2
Root; k__Eukaryota; p__Alveolata; c__Ciliophora; o__Intramacronucleata; f__Spirotrichea_None8551	0	0	0	0	0	0	0	0	0	0	0	0	0	3
Root; k__Eukaryota; p__Alveolata; c__Ciliophora; o__Intramacronucleata; f__Spirotrichea_None8568	0	0	0	0	0	0	0	0	0	0	2	0	0	0
Root; k__Eukaryota; p__Alveolata; c__Ciliophora; o__Intramacronucleata; f__Spirotrichea_None8573	0	0	0	0	0	0	0	0	0	0	0	0	0	6
Root; k__Eukaryota; p__Alveolata; c__Ciliophora; o__Intramacronucleata; f__Spirotrichea_None8578	0	0	0	0	0	0	0	0	0	0	2	1	0	0
Root; k__Eukaryota; p__Alveolata; c__Ciliophora; o__Intramacronucleata; f__Spirotrichea_None8596	0	0	0	0	0	0	0	1	0	0	0	0	0	0
Root; k__Eukaryota; p__Alveolata; c__Ciliophora; o__Intramacronucleata; f__Spirotrichea_None8654	0	0	0	0	0	0	0	0	0	0	8	9	0	0
Root; k__Eukaryota; p__Alveolata; c__Ciliophora; o__Intramacronucleata; f__Spirotrichea_None8665	0	0	0	0	0	0	0	0	0	1	0	14	0	0
Root; k__Eukaryota; p__Alveolata; c__Ciliophora; o__Intramacronucleata; f__Spirotrichea_None8691	0	0	0	0	0	0	0	0	0	0	0	1	0	9
Root; k__Eukaryota; p__Alveolata; c__Ciliophora; o__Intramacronucleata; f__Spirotrichea_None8694	0	0	1	0	0	0	0	0	0	0	0	0	0	0
Root; k__Eukaryota; p__Alveolata; c__Ciliophora; o__Intramacronucleata; f__Spirotrichea_None8702	0	0	0	0	0	0	0	0	0	0	10	2	0	0
Root; k__Eukaryota; p__Alveolata; c__Ciliophora; o__Intramacronucleata; f__Spirotrichea_None8732	0	0	0	0	0	0	3	2	0	0	1	1	0	0
Root; k__Eukaryota; p__Alveolata; c__Ciliophora; o__Intramacronucleata; f__Spirotrichea_None8740	0	0	0	0	0	0	0	0	0	0	0	0	0	4
Root; k__Eukaryota; p__Alveolata; c__Ciliophora; o__Intramacronucleata; f__Spirotrichea_None8763	0	0	0	0	0	1	0	0	0	0	0	0	0	0
Root; k__Eukaryota; p__Alveolata; c__Ciliophora; o__Intramacronucleata; f__Spirotrichea_None8781	0	0	0	0	0	0	1	0	0	0	0	1	0	0
Root; k__Eukaryota; p__Alveolata; c__Ciliophora; o__Intramacronucleata; f__Spirotrichea_None8833	0	0	0	0	0	0	4	0	0	31	21	0	0	1
Root; k__Eukaryota; p__Alveolata; c__Ciliophora; o__Intramacronucleata; f__Spirotrichea_None884	0	0	0	0	0	0	2	0	0	0	0	0	0	0
Root; k__Eukaryota; p__Alveolata; c__Ciliophora; o__Intramacronucleata; f__Spirotrichea_None8854	0	0	0	0	0	0	0	1	0	0	0	0	0	0
Root; k__Eukaryota; p__Alveolata; c__Ciliophora; o__Intramacronucleata; f__Spirotrichea_None8870	0	0	0	0	0	0	0	2	3	0	0	0	0	0
Root; k__Eukaryota; p__Alveolata; c__Ciliophora; o__Intramacronucleata; f__Spirotrichea_None8871	0	0	0	0	0	0	0	0	0	0	0	3	0	0
Root; k__Eukaryota; p__Alveolata; c__Ciliophora; o__Intramacronucleata; f__Spirotrichea_None8875	0	0	0	0	0	0	2	2	0	0	0	4	0	0
Root; k__Eukaryota; p__Alveolata; c__Ciliophora; o__Intramacronucleata; f__Spirotrichea_None8898	0	0	0	0	0	0	0	0	0	0	36	2	0	0
Root; k__Eukaryota; p__Alveolata; c__Ciliophora; o__Intramacronucleata; f__Spirotrichea_None8919	0	0	0	0	0	0	0	0	0	2	10	0	12	2
Root; k__Eukaryota; p__Alveolata; c__Ciliophora; o__Intramacronucleata; f__Spirotrichea_None8955	0	0	0	0	0	0	0	0	0	4	3	0	0	0
Root; k__Eukaryota; p__Alveolata; c__Ciliophora; o__Intramacronucleata; f__Spirotrichea_None8963	0	0	0	0	0	0	0	0	0	0	1	0	0	0
Root; k__Eukaryota; p__Alveolata; c__Ciliophora; o__Intramacronucleata; f__Spirotrichea_None8965	0	0	0	0	0	0	0	0	0	0	0	0	0	2
Root; k__Eukaryota; p__Alveolata; c__Ciliophora; o__Intramacronucleata; f__Spirotrichea_None9066	0	0	0	0	0	0	0	0	0	0	1	0	0	0
Root; k__Eukaryota; p__Alveolata; c__Ciliophora; o__Intramacronucleata; f__Spirotrichea_None9070	0	0	3	0	0	0	0	0	0	0	26	0	0	0
Root; k__Eukaryota; p__Alveolata; c__Ciliophora; o__Intramacronucleata; f__Spirotrichea_None9105	0	0	0	0	0	0	0	0	0	0	1	0	0	94
Root; k__Eukaryota; p__Alveolata; c__Ciliophora; o__Intramacronucleata; f__Spirotrichea_None9128	0	0	0	0	0	0	0	0	0	0	0	0	0	12
Root; k__Eukaryota; p__Alveolata; c__Ciliophora; o__Intramacronucleata; f__Spirotrichea_None9173	0	3	0	0	0	0	0	0	0	0	0	0	0	0
Root; k__Eukaryota; p__Alveolata; c__Ciliophora; o__Intramacronucleata; f__Spirotrichea_None9192	0	0	0	0	0	0	0	0	0	0	2	0	0	0
Root; k__Eukaryota; p__Alveolata; c__Ciliophora; o__Intramacronucleata; f__Spirotrichea_None9214	0	0	0	0	0	0	0	0	0	0	4	0	0	0
Root; k__Eukaryota; p__Alveolata; c__Ciliophora; o__Intramacronucleata; f__Spirotrichea_None9242	0	0	0	0	0	0	0	1	0	0	0	0	0	0
Root; k__Eukaryota; p__Alveolata; c__Ciliophora; o__Intramacronucleata; f__Spirotrichea_None9253	0	0	0	0	0	0	0	0	0	0	0	0	0	29
Root; k__Eukaryota; p__Alveolata; c__Ciliophora; o__Intramacronucleata; f__Spirotrichea_None9266	0	0	0	0	0	0	0	0	0	0	0	0	0	23
Root; k__Eukaryota; p__Alveolata; c__Ciliophora; o__Intramacronucleata; f__Spirotrichea_None9267	0	0	0	0	0	0	0	0	1	0	0	1	0	0
Root; k__Eukaryota; p__Alveolata; c__Ciliophora; o__Intramacronucleata; f__Spirotrichea_None9273	0	0	0	0	0	0	0	0	0	0	4	6	0	0
Root; k__Eukaryota; p__Alveolata; c__Ciliophora; o__Intramacronucleata; f__Spirotrichea_None9279	0	0	0	0	0	0	0	0	0	0	0	83	0	0
Root; k__Eukaryota; p__Alveolata; c__Ciliophora; o__Intramacronucleata; f__Spirotrichea_None929	0	0	0	0	0	0	0	0	0	0	2	0	0	0
Root; k__Eukaryota; p__Alveolata; c__Ciliophora; o__Intramacronucleata; f__Spirotrichea_None9299	0	0	0	0	0	0	0	0	0	0	1	0	0	0
Root; k__Eukaryota; p__Alveolata; c__Ciliophora; o__Intramacronucleata; f__Spirotrichea_None9301	0	0	0	0	0	0	0	1	0	0	0	0	0	0
Root; k__Eukaryota; p__Alveolata; c__Ciliophora; o__Intramacronucleata; f__Spirotrichea_None9337	0	0	0	0	0	0	0	0	0	0	0	0	0	32
Root; k__Eukaryota; p__Alveolata; c__Ciliophora; o__Intramacronucleata; f__Spirotrichea_None9356	0	0	0	0	0	0	0	0	0	0	3	0	0	0
Root; k__Eukaryota; p__Alveolata; c__Ciliophora; o__Intramacronucleata; f__Spirotrichea_None9362	0	0	0	3	0	0	0	4	0	0	4	0	0	0
Root; k__Eukaryota; p__Alveolata; c__Ciliophora; o__Intramacronucleata; f__Spirotrichea_None9387	0	0	0	0	0	0	0	0	0	0	0	0	0	7
Root; k__Eukaryota; p__Alveolata; c__Ciliophora; o__Intramacronucleata; f__Spirotrichea_None9389	0	0	0	0	0	0	0	0	0	0	0	0	0	28
Root; k__Eukaryota; p__Alveolata; c__Ciliophora; o__Intramacronucleata; f__Spirotrichea_None9392	0	0	0	0	0	0	1	3	1	3	0	0	0	29
Root; k__Eukaryota; p__Alveolata; c__Ciliophora; o__Intramacronucleata; f__Spirotrichea_None9393	0	0	0	0	0	0	0	0	1	0	8	0	0	0
Root; k__Eukaryota; p__Alveolata; c__Ciliophora; o__Intramacronucleata; f__Spirotrichea_None9419	0	0	0	0	0	0	0	0	0	0	1	0	0	0
Root; k__Eukaryota; p__Alveolata; c__Ciliophora; o__Intramacronucleata; f__Spirotrichea_None9423	0	0	0	0	0	0	0	0	0	0	0	0	0	58
Root; k__Eukaryota; p__Alveolata; c__Ciliophora; o__Intramacronucleata; f__Spirotrichea_None945	0	0	0	0	0	0	2	0	0	0	0	0	0	0
Root; k__Eukaryota; p__Alveolata; c__Ciliophora; o__Intramacronucleata; f__Spirotrichea_None9454	8	0	0	0	0	0	0	0	24	0	0	0	0	0
Root; k__Eukaryota; p__Alveolata; c__Ciliophora; o__Intramacronucleata; f__Spirotrichea_None9503	0	0	0	0	0	0	0	0	0	0	33	0	0	0
Root; k__Eukaryota; p__Alveolata; c__Ciliophora; o__Intramacronucleata; f__Spirotrichea_None9508	0	0	0	0	0	0	0	0	0	0	0	4	0	0
Root; k__Eukaryota; p__Alveolata; c__Ciliophora; o__Intramacronucleata; f__Spirotrichea_None9511	0	0	0	0	0	0	1	0	0	0	0	0	0	0
Root; k__Eukaryota; p__Alveolata; c__Ciliophora; o__Intramacronucleata; f__Spirotrichea_None9538	0	0	0	0	0	0	0	2	0	1	0	0	0	0
Root; k__Eukaryota; p__Alveolata; c__Ciliophora; o__Intramacronucleata; f__Spirotrichea_None9552	0	0	0	0	0	0	0	0	0	0	0	0	0	3
Root; k__Eukaryota; p__Alveolata; c__Ciliophora; o__Intramacronucleata; f__Spirotrichea_None9562	0	0	0	0	0	0	0	0	0	0	0	0	0	3
Root; k__Eukaryota; p__Alveolata; c__Ciliophora; o__Intramacronucleata; f__Spirotrichea_None9570	0	0	0	0	0	0	19	3	0	2	2	25	0	4
Root; k__Eukaryota; p__Alveolata; c__Ciliophora; o__Intramacronucleata; f__Spirotrichea_None9592	0	0	0	0	0	0	0	0	0	0	0	0	0	66
Root; k__Eukaryota; p__Alveolata; c__Ciliophora; o__Intramacronucleata; f__Spirotrichea_None9593	0	0	0	1	0	0	2	2	0	0	0	3	0	0
Root; k__Eukaryota; p__Alveolata; c__Ciliophora; o__Intramacronucleata; f__Spirotrichea_None9599	0	0	0	0	0	0	0	0	0	0	0	0	0	4
Root; k__Eukaryota; p__Alveolata; c__Ciliophora; o__Intramacronucleata; f__Spirotrichea_None960	0	0	0	0	0	0	4	2	0	4	6	0	0	4
Root; k__Eukaryota; p__Alveolata; c__Ciliophora; o__Intramacronucleata; f__Spirotrichea_None9619	0	0	0	0	0	0	0	0	0	0	7	1	1	0
Root; k__Eukaryota; p__Alveolata; c__Ciliophora; o__Intramacronucleata; f__Spirotrichea_None9638	0	0	0	0	0	0	0	0	0	0	0	0	0	85
Root; k__Eukaryota; p__Alveolata; c__Ciliophora; o__Intramacronucleata; f__Spirotrichea_None9640	0	1	0	0	0	0	0	0	0	0	1	1	0	0
Root; k__Eukaryota; p__Alveolata; c__Ciliophora; o__Intramacronucleata; f__Spirotrichea_None9647	0	0	0	0	0	0	0	0	0	0	0	0	0	2
Root; k__Eukaryota; p__Alveolata; c__Ciliophora; o__Intramacronucleata; f__Spirotrichea_None9666	0	0	0	0	1	0	0	1	0	1	0	1	0	2
Root; k__Eukaryota; p__Alveolata; c__Ciliophora; o__Intramacronucleata; f__Spirotrichea_None9674	0	0	0	0	0	0	0	2	0	0	0	2	0	4
Root; k__Eukaryota; p__Alveolata; c__Ciliophora; o__Intramacronucleata; f__Spirotrichea_None9684	0	0	0	0	0	0	0	0	3	0	0	0	0	0
Root; k__Eukaryota; p__Alveolata; c__Ciliophora; o__Intramacronucleata; f__Spirotrichea_None9713	0	0	0	0	0	0	0	0	0	0	0	4	0	2
Root; k__Eukaryota; p__Alveolata; c__Ciliophora; o__Intramacronucleata; f__Spirotrichea_None972	0	0	0	0	0	0	1	0	0	0	0	0	0	0
Root; k__Eukaryota; p__Alveolata; c__Ciliophora; o__Intramacronucleata; f__Spirotrichea_None9720	0	0	0	0	0	0	0	0	0	0	2	0	0	0
Root; k__Eukaryota; p__Alveolata; c__Ciliophora; o__Intramacronucleata; f__Spirotrichea_None973	0	0	0	0	0	0	0	0	0	0	1	0	0	0
Root; k__Eukaryota; p__Alveolata; c__Ciliophora; o__Intramacronucleata; f__Spirotrichea_None9782	0	0	0	0	0	0	0	0	0	0	0	0	0	21
Root; k__Eukaryota; p__Alveolata; c__Ciliophora; o__Intramacronucleata; f__Spirotrichea_None9791	0	0	0	0	0	0	0	0	0	0	0	0	0	73
Root; k__Eukaryota; p__Alveolata; c__Ciliophora; o__Intramacronucleata; f__Spirotrichea_None9808	0	0	0	0	0	0	0	0	0	0	0	0	0	162
Root; k__Eukaryota; p__Alveolata; c__Ciliophora; o__Intramacronucleata; f__Spirotrichea_None9812	0	0	0	0	0	0	0	0	0	0	0	0	0	190
Root; k__Eukaryota; p__Alveolata; c__Ciliophora; o__Intramacronucleata; f__Spirotrichea_None9834	0	0	0	0	0	0	0	0	0	0	9	1	0	0
Root; k__Eukaryota; p__Alveolata; c__Ciliophora; o__Intramacronucleata; f__Spirotrichea_None9836	0	0	0	0	0	0	0	0	0	0	8	17	0	0
Root; k__Eukaryota; p__Alveolata; c__Ciliophora; o__Intramacronucleata; f__Spirotrichea_None9842	0	0	0	0	0	0	0	0	0	2	0	0	0	0
Root; k__Eukaryota; p__Alveolata; c__Ciliophora; o__Intramacronucleata; f__Spirotrichea_None9858	0	0	0	0	0	0	0	0	0	0	0	0	0	1
Root; k__Eukaryota; p__Alveolata; c__Ciliophora; o__Intramacronucleata; f__Spirotrichea_None9870	0	0	0	0	0	0	0	0	0	0	7	0	0	2
Root; k__Eukaryota; p__Alveolata; c__Ciliophora; o__Intramacronucleata; f__Spirotrichea_None9921	0	0	0	0	0	0	0	0	0	1	0	0	0	0
Root; k__Eukaryota; p__Alveolata; c__Ciliophora; o__Intramacronucleata; f__Spirotrichea_None993	0	0	0	0	0	0	0	0	0	0	0	0	0	39
Root; k__Eukaryota; p__Alveolata; c__Ciliophora; o__Intramacronucleata; f__Spirotrichea_None9932	0	0	0	0	0	0	0	0	0	0	0	1	0	40
Root; k__Eukaryota; p__Alveolata; c__Ciliophora; o__Intramacronucleata; f__Spirotrichea_None9939	0	0	0	0	0	0	0	0	0	0	1	7	0	60
Root; k__Eukaryota; p__Alveolata; c__Ciliophora; o__Intramacronucleata; f__Spirotrichea_None9951	0	0	0	0	0	0	0	0	0	0	0	0	0	6
Root; k__Eukaryota; p__Alveolata; c__Ciliophora; o__Intramacronucleata; f__Spirotrichea_None9959	0	0	0	0	0	0	0	0	0	0	5	11	0	0
Root; k__Eukaryota; p__Alveolata; c__Ciliophora; o__Intramacronucleata_None10051	0	0	0	0	0	0	0	0	0	0	0	0	0	3
Root; k__Eukaryota; p__Alveolata; c__Ciliophora; o__Intramacronucleata_None10124	0	0	0	0	0	0	0	0	0	0	0	0	0	9
Root; k__Eukaryota; p__Alveolata; c__Ciliophora; o__Intramacronucleata_None10205	0	0	0	0	0	0	0	0	0	0	0	1	0	7
Root; k__Eukaryota; p__Alveolata; c__Ciliophora; o__Intramacronucleata_None10358	0	0	0	0	0	0	0	0	0	0	0	0	0	4
Root; k__Eukaryota; p__Alveolata; c__Ciliophora; o__Intramacronucleata_None10443	0	0	0	0	0	0	0	0	0	0	1	0	0	0
Root; k__Eukaryota; p__Alveolata; c__Ciliophora; o__Intramacronucleata_None10564	0	0	0	0	0	0	0	0	0	0	0	0	0	1
Root; k__Eukaryota; p__Alveolata; c__Ciliophora; o__Intramacronucleata_None10700	0	0	0	0	0	0	0	0	0	0	26	0	0	0
Root; k__Eukaryota; p__Alveolata; c__Ciliophora; o__Intramacronucleata_None10792	0	0	0	0	0	0	18	0	49	0	2	9	0	0
Root; k__Eukaryota; p__Alveolata; c__Ciliophora; o__Intramacronucleata_None11477	0	0	0	0	0	0	1	0	0	0	0	0	0	0
Root; k__Eukaryota; p__Alveolata; c__Ciliophora; o__Intramacronucleata_None11701	0	0	0	0	0	0	1	1	0	0	0	0	0	0
Root; k__Eukaryota; p__Alveolata; c__Ciliophora; o__Intramacronucleata_None1171	0	0	0	0	0	0	0	0	0	0	0	0	0	2
Root; k__Eukaryota; p__Alveolata; c__Ciliophora; o__Intramacronucleata_None11828	0	0	0	0	0	0	0	0	0	0	7	0	0	0
Root; k__Eukaryota; p__Alveolata; c__Ciliophora; o__Intramacronucleata_None11970	0	0	0	0	0	0	0	0	0	0	0	1	0	0
Root; k__Eukaryota; p__Alveolata; c__Ciliophora; o__Intramacronucleata_None1252	0	0	0	0	0	0	0	0	0	0	3	2	0	0
Root; k__Eukaryota; p__Alveolata; c__Ciliophora; o__Intramacronucleata_None1680	0	0	0	0	0	0	0	0	0	0	1	0	0	0
Root; k__Eukaryota; p__Alveolata; c__Ciliophora; o__Intramacronucleata_None1836	0	0	0	0	0	0	0	0	0	0	0	0	0	1
Root; k__Eukaryota; p__Alveolata; c__Ciliophora; o__Intramacronucleata_None2374	0	0	0	0	0	0	0	0	0	0	1	0	0	0
Root; k__Eukaryota; p__Alveolata; c__Ciliophora; o__Intramacronucleata_None240	0	0	0	0	0	0	0	0	0	0	2	0	0	0
Root; k__Eukaryota; p__Alveolata; c__Ciliophora; o__Intramacronucleata_None2464	0	0	0	0	0	0	0	0	0	0	10	0	0	0
Root; k__Eukaryota; p__Alveolata; c__Ciliophora; o__Intramacronucleata_None2591	0	0	0	0	0	0	0	0	0	0	1	0	0	0
Root; k__Eukaryota; p__Alveolata; c__Ciliophora; o__Intramacronucleata_None2644	0	0	0	0	0	0	0	0	0	0	0	14	0	0
Root; k__Eukaryota; p__Alveolata; c__Ciliophora; o__Intramacronucleata_None2693	0	0	0	0	0	0	0	0	0	0	0	0	0	1
Root; k__Eukaryota; p__Alveolata; c__Ciliophora; o__Intramacronucleata_None2873	0	0	0	0	0	0	0	0	0	0	2	1	0	0
Root; k__Eukaryota; p__Alveolata; c__Ciliophora; o__Intramacronucleata_None2904	0	0	0	0	0	0	0	0	0	0	0	1	0	0
Root; k__Eukaryota; p__Alveolata; c__Ciliophora; o__Intramacronucleata_None2974	0	0	0	0	0	0	0	0	0	1	0	0	0	0
Root; k__Eukaryota; p__Alveolata; c__Ciliophora; o__Intramacronucleata_None3063	0	0	0	0	0	0	0	0	0	1	0	0	0	0
Root; k__Eukaryota; p__Alveolata; c__Ciliophora; o__Intramacronucleata_None311	0	0	0	0	0	0	0	0	0	0	0	0	0	9
Root; k__Eukaryota; p__Alveolata; c__Ciliophora; o__Intramacronucleata_None364	0	0	0	0	0	0	0	0	0	0	0	0	0	116
Root; k__Eukaryota; p__Alveolata; c__Ciliophora; o__Intramacronucleata_None3743	0	0	0	1	0	0	1	0	0	0	0	0	0	0
Root; k__Eukaryota; p__Alveolata; c__Ciliophora; o__Intramacronucleata_None4014	0	0	0	0	0	0	0	0	0	0	1	0	0	0
Root; k__Eukaryota; p__Alveolata; c__Ciliophora; o__Intramacronucleata_None4052	0	0	0	0	0	0	0	0	0	0	0	0	0	7
Root; k__Eukaryota; p__Alveolata; c__Ciliophora; o__Intramacronucleata_None438	0	0	0	0	0	0	0	0	0	0	0	0	0	5
Root; k__Eukaryota; p__Alveolata; c__Ciliophora; o__Intramacronucleata_None446	0	0	0	0	0	0	0	0	0	0	2	0	0	0
Root; k__Eukaryota; p__Alveolata; c__Ciliophora; o__Intramacronucleata_None4535	0	0	0	0	0	0	0	0	0	0	0	0	0	2
Root; k__Eukaryota; p__Alveolata; c__Ciliophora; o__Intramacronucleata_None4621	0	0	0	0	0	0	0	0	0	0	0	5	0	0
Root; k__Eukaryota; p__Alveolata; c__Ciliophora; o__Intramacronucleata_None468	0	0	0	0	0	0	0	0	0	0	1	0	0	0
Root; k__Eukaryota; p__Alveolata; c__Ciliophora; o__Intramacronucleata_None4777	0	0	0	0	0	0	0	0	0	0	0	0	0	19
Root; k__Eukaryota; p__Alveolata; c__Ciliophora; o__Intramacronucleata_None4779	0	0	0	0	0	0	0	0	0	0	0	2	0	122
Root; k__Eukaryota; p__Alveolata; c__Ciliophora; o__Intramacronucleata_None4933	0	0	0	0	0	0	0	0	0	0	0	0	0	10
Root; k__Eukaryota; p__Alveolata; c__Ciliophora; o__Intramacronucleata_None5180	0	0	0	0	25	0	0	0	0	0	0	0	8	0
Root; k__Eukaryota; p__Alveolata; c__Ciliophora; o__Intramacronucleata_None5234	0	0	0	0	0	0	0	0	0	0	0	0	0	4
Root; k__Eukaryota; p__Alveolata; c__Ciliophora; o__Intramacronucleata_None528	0	0	0	0	0	0	0	0	0	0	1	1	0	4
Root; k__Eukaryota; p__Alveolata; c__Ciliophora; o__Intramacronucleata_None5342	0	0	0	0	0	0	0	0	0	0	0	0	0	3
Root; k__Eukaryota; p__Alveolata; c__Ciliophora; o__Intramacronucleata_None5841	0	0	0	0	0	0	0	0	0	0	0	0	0	11
Root; k__Eukaryota; p__Alveolata; c__Ciliophora; o__Intramacronucleata_None6129	0	0	0	0	0	0	0	0	0	0	0	0	0	1
Root; k__Eukaryota; p__Alveolata; c__Ciliophora; o__Intramacronucleata_None6162	0	0	0	0	0	0	0	0	0	0	0	0	0	7
Root; k__Eukaryota; p__Alveolata; c__Ciliophora; o__Intramacronucleata_None6371	0	0	0	0	0	0	0	0	0	0	1	8	0	1
Root; k__Eukaryota; p__Alveolata; c__Ciliophora; o__Intramacronucleata_None641	0	0	0	0	0	0	0	1	0	0	0	0	0	0
Root; k__Eukaryota; p__Alveolata; c__Ciliophora; o__Intramacronucleata_None6607	0	0	0	0	1	0	3	1	1	4	1	1	0	10
Root; k__Eukaryota; p__Alveolata; c__Ciliophora; o__Intramacronucleata_None7037	0	0	0	0	0	0	0	0	21	0	0	0	0	0
Root; k__Eukaryota; p__Alveolata; c__Ciliophora; o__Intramacronucleata_None7057	0	0	0	0	0	0	0	0	0	0	0	0	0	1
Root; k__Eukaryota; p__Alveolata; c__Ciliophora; o__Intramacronucleata_None7183	0	0	0	0	0	0	0	1	0	0	0	0	0	0
Root; k__Eukaryota; p__Alveolata; c__Ciliophora; o__Intramacronucleata_None7237	0	0	0	0	0	0	0	1	0	0	0	0	0	0
Root; k__Eukaryota; p__Alveolata; c__Ciliophora; o__Intramacronucleata_None7752	0	0	0	0	0	0	0	0	0	0	0	1	0	0
Root; k__Eukaryota; p__Alveolata; c__Ciliophora; o__Intramacronucleata_None8010	0	0	0	0	0	0	0	0	0	0	0	1	0	0
Root; k__Eukaryota; p__Alveolata; c__Ciliophora; o__Intramacronucleata_None8140	0	0	0	0	0	0	0	0	0	0	0	0	0	1
Root; k__Eukaryota; p__Alveolata; c__Ciliophora; o__Intramacronucleata_None8174	0	0	0	0	0	0	0	0	0	0	0	0	0	1
Root; k__Eukaryota; p__Alveolata; c__Ciliophora; o__Intramacronucleata_None834	0	0	0	0	0	0	0	0	0	0	0	0	0	19
Root; k__Eukaryota; p__Alveolata; c__Ciliophora; o__Intramacronucleata_None8506	0	0	0	0	0	0	0	0	0	0	0	0	0	3
Root; k__Eukaryota; p__Alveolata; c__Ciliophora; o__Intramacronucleata_None8723	0	0	0	0	0	0	0	0	0	0	7	0	0	0
Root; k__Eukaryota; p__Alveolata; c__Ciliophora; o__Intramacronucleata_None9047	0	0	0	0	0	0	0	0	0	0	0	3	0	110
Root; k__Eukaryota; p__Alveolata; c__Ciliophora; o__Intramacronucleata_None9073	0	0	0	0	0	0	0	0	1	0	0	0	0	0
Root; k__Eukaryota; p__Alveolata; c__Ciliophora; o__Intramacronucleata_None9383	0	0	0	0	0	0	0	0	0	0	2	0	0	0
Root; k__Eukaryota; p__Alveolata; c__Ciliophora; o__Intramacronucleata_None9474	0	0	0	0	1	0	0	0	0	0	0	0	0	0
Root; k__Eukaryota; p__Alveolata; c__Ciliophora; o__Intramacronucleata_None9732	0	0	0	0	0	0	0	0	0	0	0	0	0	1
Root; k__Eukaryota; p__Alveolata; c__Ciliophora; o__Intramacronucleata_None9918	0	0	0	0	0	4	4	0	0	0	0	0	0	0
Root; k__Eukaryota; p__Alveolata; c__Ciliophora; o__Intramacronucleata_None994	0	0	0	0	0	0	0	0	0	0	1	0	0	0
Root; k__Eukaryota; p__Alveolata; c__Ciliophora; o__Postciliodesmatophora; f__Heterotrichea_36722	0	0	4	0	5	0	0	3	0	0	0	0	0	0
Root; k__Eukaryota; p__Alveolata; c__Ciliophora; o__Postciliodesmatophora; f__Heterotrichea_66049	0	3	0	0	0	0	0	0	0	0	0	0	0	0
Root; k__Eukaryota; p__Alveolata; c__Ciliophora; o__Postciliodesmatophora; f__Heterotrichea_81307	0	0	13	0	8	0	0	167	0	0	0	0	9	22
Root; k__Eukaryota; p__Alveolata; c__Ciliophora; o__Postciliodesmatophora; f__Heterotrichea_83135	0	0	1	0	7	0	0	4	0	0	0	0	0	6
Root; k__Eukaryota; p__Alveolata; c__Ciliophora; o__Postciliodesmatophora; f__Heterotrichea_None10014	0	0	0	0	24	0	0	0	0	0	0	0	0	0
Root; k__Eukaryota; p__Alveolata; c__Ciliophora; o__Postciliodesmatophora; f__Heterotrichea_None10096	0	0	0	0	0	0	0	6	0	0	0	0	0	0
Root; k__Eukaryota; p__Alveolata; c__Ciliophora; o__Postciliodesmatophora; f__Heterotrichea_None10462	0	0	0	0	1	0	0	0	0	0	0	0	0	0
Root; k__Eukaryota; p__Alveolata; c__Ciliophora; o__Postciliodesmatophora; f__Heterotrichea_None10482	0	0	0	0	0	0	0	6	0	0	0	0	0	0
Root; k__Eukaryota; p__Alveolata; c__Ciliophora; o__Postciliodesmatophora; f__Heterotrichea_None10602	0	0	0	0	0	0	0	3	0	0	0	0	0	0
Root; k__Eukaryota; p__Alveolata; c__Ciliophora; o__Postciliodesmatophora; f__Heterotrichea_None10621	0	0	0	0	0	0	0	2	0	0	0	0	0	0
Root; k__Eukaryota; p__Alveolata; c__Ciliophora; o__Postciliodesmatophora; f__Heterotrichea_None10839	0	1	0	0	0	0	0	0	0	0	0	0	0	0
Root; k__Eukaryota; p__Alveolata; c__Ciliophora; o__Postciliodesmatophora; f__Heterotrichea_None11707	0	0	0	0	0	0	0	25	0	0	0	0	1	1
Root; k__Eukaryota; p__Alveolata; c__Ciliophora; o__Postciliodesmatophora; f__Heterotrichea_None11847	0	0	1	0	0	0	0	4	0	0	0	0	0	0
Root; k__Eukaryota; p__Alveolata; c__Ciliophora; o__Postciliodesmatophora; f__Heterotrichea_None1379	0	0	0	0	0	0	0	5	0	0	0	0	0	0
Root; k__Eukaryota; p__Alveolata; c__Ciliophora; o__Postciliodesmatophora; f__Heterotrichea_None1386	0	0	0	0	0	0	0	0	0	0	0	0	0	1
Root; k__Eukaryota; p__Alveolata; c__Ciliophora; o__Postciliodesmatophora; f__Heterotrichea_None1515	0	0	0	0	2	0	0	0	0	0	0	0	0	0
Root; k__Eukaryota; p__Alveolata; c__Ciliophora; o__Postciliodesmatophora; f__Heterotrichea_None1631	0	0	0	0	0	0	0	2	0	0	0	0	0	0
Root; k__Eukaryota; p__Alveolata; c__Ciliophora; o__Postciliodesmatophora; f__Heterotrichea_None1672	0	0	0	0	0	0	0	1	0	0	0	0	0	0
Root; k__Eukaryota; p__Alveolata; c__Ciliophora; o__Postciliodesmatophora; f__Heterotrichea_None1732	0	0	0	0	11	0	0	0	0	0	0	0	0	0
Root; k__Eukaryota; p__Alveolata; c__Ciliophora; o__Postciliodesmatophora; f__Heterotrichea_None2348	0	0	2	0	0	0	0	7	0	0	0	0	0	0
Root; k__Eukaryota; p__Alveolata; c__Ciliophora; o__Postciliodesmatophora; f__Heterotrichea_None2577	0	0	0	0	0	0	0	1	0	0	0	0	0	0
Root; k__Eukaryota; p__Alveolata; c__Ciliophora; o__Postciliodesmatophora; f__Heterotrichea_None343	0	0	0	0	1	0	0	0	0	0	0	0	0	0
Root; k__Eukaryota; p__Alveolata; c__Ciliophora; o__Postciliodesmatophora; f__Heterotrichea_None3561	0	0	0	0	2	0	0	0	0	0	0	0	0	0
Root; k__Eukaryota; p__Alveolata; c__Ciliophora; o__Postciliodesmatophora; f__Heterotrichea_None4008	0	0	0	0	0	0	0	3	0	0	0	0	0	0
Root; k__Eukaryota; p__Alveolata; c__Ciliophora; o__Postciliodesmatophora; f__Heterotrichea_None4010	0	0	0	0	0	0	0	2	0	0	0	0	0	0
Root; k__Eukaryota; p__Alveolata; c__Ciliophora; o__Postciliodesmatophora; f__Heterotrichea_None4016	0	0	0	0	8	0	0	0	0	0	0	0	0	0
Root; k__Eukaryota; p__Alveolata; c__Ciliophora; o__Postciliodesmatophora; f__Heterotrichea_None4495	0	0	1	0	0	0	0	3	0	0	0	0	0	0
Root; k__Eukaryota; p__Alveolata; c__Ciliophora; o__Postciliodesmatophora; f__Heterotrichea_None5006	0	0	0	0	0	0	0	4	0	0	0	0	0	0
Root; k__Eukaryota; p__Alveolata; c__Ciliophora; o__Postciliodesmatophora; f__Heterotrichea_None5014	0	0	1	0	0	0	0	0	0	0	0	0	0	0
Root; k__Eukaryota; p__Alveolata; c__Ciliophora; o__Postciliodesmatophora; f__Heterotrichea_None5020	0	0	0	0	0	0	0	1	0	0	0	0	0	0
Root; k__Eukaryota; p__Alveolata; c__Ciliophora; o__Postciliodesmatophora; f__Heterotrichea_None5204	0	0	0	0	0	0	0	3	0	0	0	0	0	2
Root; k__Eukaryota; p__Alveolata; c__Ciliophora; o__Postciliodesmatophora; f__Heterotrichea_None5319	0	0	0	0	0	0	0	3	0	0	0	0	0	0
Root; k__Eukaryota; p__Alveolata; c__Ciliophora; o__Postciliodesmatophora; f__Heterotrichea_None5646	0	0	0	0	0	0	0	4	0	0	0	0	0	0
Root; k__Eukaryota; p__Alveolata; c__Ciliophora; o__Postciliodesmatophora; f__Heterotrichea_None5995	0	0	2	0	0	0	0	2	0	0	0	0	0	0
Root; k__Eukaryota; p__Alveolata; c__Ciliophora; o__Postciliodesmatophora; f__Heterotrichea_None6172	0	0	0	0	0	0	0	4	0	0	0	0	0	0
Root; k__Eukaryota; p__Alveolata; c__Ciliophora; o__Postciliodesmatophora; f__Heterotrichea_None6996	0	0	0	0	0	0	0	1	0	0	0	0	0	0
Root; k__Eukaryota; p__Alveolata; c__Ciliophora; o__Postciliodesmatophora; f__Heterotrichea_None704	0	0	0	0	0	0	0	1	0	0	0	0	0	0
Root; k__Eukaryota; p__Alveolata; c__Ciliophora; o__Postciliodesmatophora; f__Heterotrichea_None7088	0	0	2	0	0	0	0	4	0	0	0	0	0	0
Root; k__Eukaryota; p__Alveolata; c__Ciliophora; o__Postciliodesmatophora; f__Heterotrichea_None7705	0	0	1	0	0	0	0	0	0	0	0	0	0	0
Root; k__Eukaryota; p__Alveolata; c__Ciliophora; o__Postciliodesmatophora; f__Heterotrichea_None786	0	0	0	0	0	0	0	1	0	0	0	0	0	0
Root; k__Eukaryota; p__Alveolata; c__Ciliophora; o__Postciliodesmatophora; f__Heterotrichea_None8114	0	0	0	0	0	0	0	2	0	0	0	0	0	0
Root; k__Eukaryota; p__Alveolata; c__Ciliophora; o__Postciliodesmatophora; f__Heterotrichea_None8439	0	0	1	0	0	0	0	3	0	0	0	0	2	0
Root; k__Eukaryota; p__Alveolata; c__Ciliophora; o__Postciliodesmatophora; f__Heterotrichea_None9194	0	0	0	0	0	0	0	0	0	0	0	0	0	1
Root; k__Eukaryota; p__Alveolata; c__Ciliophora; o__Postciliodesmatophora; f__Heterotrichea_None9228	0	0	0	0	0	0	0	1	0	0	0	0	0	0
Root; k__Eukaryota; p__Alveolata; c__Ciliophora; o__Postciliodesmatophora; f__Heterotrichea_None9369	0	0	0	0	0	0	0	2	0	0	0	0	0	0
Root; k__Eukaryota; p__Alveolata; c__Ciliophora; o__Postciliodesmatophora; f__Heterotrichea_None9401	0	0	2	0	0	0	0	1	0	0	0	0	2	0
Root; k__Eukaryota; p__Alveolata; c__Ciliophora; o__Postciliodesmatophora; f__Karyorelictea_None4872	0	0	0	0	0	0	0	0	0	0	0	0	0	3
Root; k__Eukaryota; p__Alveolata; c__Ciliophora_None10237	0	0	0	0	0	0	0	0	0	0	0	0	0	8
Root; k__Eukaryota; p__Alveolata; c__Ciliophora_None10379	0	0	0	1	0	0	0	0	1	0	0	1	0	1
Root; k__Eukaryota; p__Alveolata; c__Ciliophora_None10670	0	0	0	0	0	0	0	0	1	0	0	0	0	0
Root; k__Eukaryota; p__Alveolata; c__Ciliophora_None10686	0	0	0	0	0	0	0	0	0	0	0	0	0	1
Root; k__Eukaryota; p__Alveolata; c__Ciliophora_None1087	0	0	0	0	0	0	0	0	0	1	0	0	0	0
Root; k__Eukaryota; p__Alveolata; c__Ciliophora_None11229	0	0	0	0	0	0	0	0	0	0	1	2	0	0
Root; k__Eukaryota; p__Alveolata; c__Ciliophora_None11360	0	0	0	0	0	0	0	0	0	0	0	0	0	28
Root; k__Eukaryota; p__Alveolata; c__Ciliophora_None11394	0	0	0	0	0	0	0	0	0	0	2	1	0	0
Root; k__Eukaryota; p__Alveolata; c__Ciliophora_None11525	0	0	0	0	0	0	0	0	0	0	1	0	0	0
Root; k__Eukaryota; p__Alveolata; c__Ciliophora_None11982	0	0	0	0	0	0	0	0	0	0	0	0	0	4
Root; k__Eukaryota; p__Alveolata; c__Ciliophora_None1415	0	0	0	0	0	0	0	1	0	0	0	0	0	0
Root; k__Eukaryota; p__Alveolata; c__Ciliophora_None1794	0	0	0	0	0	0	0	0	0	2	0	0	0	0
Root; k__Eukaryota; p__Alveolata; c__Ciliophora_None1889	0	0	0	0	0	0	0	0	1	0	0	0	0	0
Root; k__Eukaryota; p__Alveolata; c__Ciliophora_None2569	0	0	0	0	1	0	0	1	0	0	0	0	1	5
Root; k__Eukaryota; p__Alveolata; c__Ciliophora_None2571	0	0	0	0	0	0	0	0	0	0	0	19	0	0
Root; k__Eukaryota; p__Alveolata; c__Ciliophora_None3133	0	0	0	0	0	2	0	0	0	0	0	0	0	4
Root; k__Eukaryota; p__Alveolata; c__Ciliophora_None3221	0	0	0	0	0	0	0	0	0	1	0	0	0	0
Root; k__Eukaryota; p__Alveolata; c__Ciliophora_None3230	0	0	0	0	0	0	0	0	0	0	1	0	0	0
Root; k__Eukaryota; p__Alveolata; c__Ciliophora_None3267	0	0	0	0	0	0	0	0	0	0	0	0	0	21
Root; k__Eukaryota; p__Alveolata; c__Ciliophora_None3278	0	1	0	0	0	0	2	1	0	2	0	1	0	10
Root; k__Eukaryota; p__Alveolata; c__Ciliophora_None3437	0	0	0	0	0	0	1	0	0	0	0	0	0	3
Root; k__Eukaryota; p__Alveolata; c__Ciliophora_None3585	0	1	0	0	0	0	1	0	1	0	0	0	0	0
Root; k__Eukaryota; p__Alveolata; c__Ciliophora_None3681	0	0	3	0	1	0	0	0	0	0	0	0	0	0
Root; k__Eukaryota; p__Alveolata; c__Ciliophora_None3782	0	0	0	0	0	0	0	0	0	0	1	0	0	0
Root; k__Eukaryota; p__Alveolata; c__Ciliophora_None3829	0	0	0	0	0	0	0	0	0	2	0	0	0	0
Root; k__Eukaryota; p__Alveolata; c__Ciliophora_None4189	0	0	0	0	0	0	0	0	0	1	0	0	0	0
Root; k__Eukaryota; p__Alveolata; c__Ciliophora_None4276	0	0	0	0	0	0	0	0	0	0	0	0	0	1
Root; k__Eukaryota; p__Alveolata; c__Ciliophora_None4358	0	2	0	0	0	0	1	0	0	0	0	0	0	0
Root; k__Eukaryota; p__Alveolata; c__Ciliophora_None4635	0	0	0	0	0	0	0	0	0	1	0	0	0	0
Root; k__Eukaryota; p__Alveolata; c__Ciliophora_None4676	0	0	0	0	0	0	0	0	0	0	1	1	0	0
Root; k__Eukaryota; p__Alveolata; c__Ciliophora_None4747	0	0	0	0	0	0	0	0	0	0	0	0	0	2
Root; k__Eukaryota; p__Alveolata; c__Ciliophora_None490	0	0	0	0	0	0	4	0	0	0	1	0	0	0
Root; k__Eukaryota; p__Alveolata; c__Ciliophora_None5061	0	0	0	0	1	0	0	9	1	5	0	2	0	0
Root; k__Eukaryota; p__Alveolata; c__Ciliophora_None5119	0	2	0	0	0	10	0	0	0	0	1	0	0	0
Root; k__Eukaryota; p__Alveolata; c__Ciliophora_None5449	0	0	0	0	0	0	0	0	0	0	0	2	2	0
Root; k__Eukaryota; p__Alveolata; c__Ciliophora_None5535	0	0	0	0	3	0	0	0	0	0	0	0	0	0
Root; k__Eukaryota; p__Alveolata; c__Ciliophora_None5755	0	0	0	0	0	0	0	0	0	0	1	0	0	0
Root; k__Eukaryota; p__Alveolata; c__Ciliophora_None5807	0	0	0	0	0	0	0	0	0	0	0	0	0	2
Root; k__Eukaryota; p__Alveolata; c__Ciliophora_None5902	0	0	0	0	0	0	0	0	0	0	0	19	0	0
Root; k__Eukaryota; p__Alveolata; c__Ciliophora_None5976	0	0	0	0	0	0	0	0	0	0	0	0	3	10
Root; k__Eukaryota; p__Alveolata; c__Ciliophora_None6198	0	0	0	0	0	0	0	2	0	1	0	0	0	0
Root; k__Eukaryota; p__Alveolata; c__Ciliophora_None6342	0	0	0	0	0	0	0	0	0	0	0	24	0	0
Root; k__Eukaryota; p__Alveolata; c__Ciliophora_None6483	0	0	0	0	0	11	0	1	1	0	0	0	0	4
Root; k__Eukaryota; p__Alveolata; c__Ciliophora_None661	0	0	0	0	0	0	0	0	0	0	1	1	0	0
Root; k__Eukaryota; p__Alveolata; c__Ciliophora_None6644	0	0	0	0	0	0	0	0	0	0	0	0	0	1
Root; k__Eukaryota; p__Alveolata; c__Ciliophora_None6664	0	0	0	0	0	0	0	0	0	3	0	1	0	2
Root; k__Eukaryota; p__Alveolata; c__Ciliophora_None675	0	0	0	0	0	0	0	0	0	0	0	0	0	1
Root; k__Eukaryota; p__Alveolata; c__Ciliophora_None6942	0	0	0	0	0	0	0	0	0	0	0	0	0	4
Root; k__Eukaryota; p__Alveolata; c__Ciliophora_None6950	0	0	0	0	0	0	1	0	0	0	7	0	0	0
Root; k__Eukaryota; p__Alveolata; c__Ciliophora_None696	0	0	0	0	0	0	0	0	0	0	0	0	0	1
Root; k__Eukaryota; p__Alveolata; c__Ciliophora_None6964	0	0	0	0	0	0	0	0	0	0	1	0	0	0
Root; k__Eukaryota; p__Alveolata; c__Ciliophora_None7046	0	0	0	0	0	0	0	0	0	0	3	0	0	0
Root; k__Eukaryota; p__Alveolata; c__Ciliophora_None7418	0	0	0	0	0	0	2	0	0	0	0	0	0	0
Root; k__Eukaryota; p__Alveolata; c__Ciliophora_None8016	0	0	0	0	0	0	1	0	0	0	0	0	0	0
Root; k__Eukaryota; p__Alveolata; c__Ciliophora_None8069	0	0	0	0	0	0	0	0	0	3	0	0	0	0
Root; k__Eukaryota; p__Alveolata; c__Ciliophora_None8133	0	0	0	0	0	0	1	0	0	0	0	0	0	0
Root; k__Eukaryota; p__Alveolata; c__Ciliophora_None8584	0	0	0	0	0	0	1	0	0	0	0	0	0	0
Root; k__Eukaryota; p__Alveolata; c__Ciliophora_None8793	0	0	0	0	0	0	0	0	0	1	0	0	0	0
Root; k__Eukaryota; p__Alveolata; c__Ciliophora_None8830	0	0	0	0	0	0	0	0	0	0	0	0	0	8
Root; k__Eukaryota; p__Alveolata; c__Ciliophora_None8880	0	1	0	0	0	9	0	0	0	0	0	0	0	0
Root; k__Eukaryota; p__Alveolata; c__Ciliophora_None9231	0	0	0	0	0	0	0	0	0	0	0	2	0	0
Root; k__Eukaryota; p__Alveolata; c__Ciliophora_None9324	0	0	0	0	0	0	0	1	0	0	0	0	0	11
Root; k__Eukaryota; p__Alveolata; c__Ciliophora_None9935	0	0	0	0	0	0	0	0	0	0	0	0	0	3
Root; k__Eukaryota; p__Alveolata; c__Dinophyceae; o__Environmental_samples; f__Uncultured_amoebophrya_64063	0	0	2	1	0	0	1	0	3	4	6	3	4	68
Root; k__Eukaryota; p__Alveolata; c__Dinophyceae; o__Environmental_samples; f__Uncultured_amoebophrya_81734	0	0	0	0	0	0	0	0	1	17	1	0	1	22
Root; k__Eukaryota; p__Alveolata; c__Dinophyceae; o__Environmental_samples; f__Uncultured_amoebophrya_None10067	0	0	0	0	0	0	0	0	1	0	0	0	0	0
Root; k__Eukaryota; p__Alveolata; c__Dinophyceae; o__Environmental_samples; f__Uncultured_amoebophrya_None10296	0	0	0	0	0	0	0	0	0	3	0	0	0	0
Root; k__Eukaryota; p__Alveolata; c__Dinophyceae; o__Environmental_samples; f__Uncultured_amoebophrya_None10436	0	0	0	0	0	0	0	0	0	1	0	0	0	0
Root; k__Eukaryota; p__Alveolata; c__Dinophyceae; o__Environmental_samples; f__Uncultured_amoebophrya_None1076	0	1	0	1	5	0	6	10	64	13	0	2	1	26
Root; k__Eukaryota; p__Alveolata; c__Dinophyceae; o__Environmental_samples; f__Uncultured_amoebophrya_None11842	0	0	0	0	0	0	1	0	2	0	0	0	0	0
Root; k__Eukaryota; p__Alveolata; c__Dinophyceae; o__Environmental_samples; f__Uncultured_amoebophrya_None125	0	0	0	0	0	0	0	0	2	0	0	0	0	0
Root; k__Eukaryota; p__Alveolata; c__Dinophyceae; o__Environmental_samples; f__Uncultured_amoebophrya_None147	0	0	0	0	0	0	0	0	0	0	0	0	0	3
Root; k__Eukaryota; p__Alveolata; c__Dinophyceae; o__Environmental_samples; f__Uncultured_amoebophrya_None2244	0	0	0	0	0	0	0	0	0	2	1	2	1	1
Root; k__Eukaryota; p__Alveolata; c__Dinophyceae; o__Environmental_samples; f__Uncultured_amoebophrya_None2417	0	0	0	0	0	0	0	0	0	0	0	0	0	1
Root; k__Eukaryota; p__Alveolata; c__Dinophyceae; o__Environmental_samples; f__Uncultured_amoebophrya_None3126	0	0	0	0	0	0	0	2	4	1	0	0	0	0
Root; k__Eukaryota; p__Alveolata; c__Dinophyceae; o__Environmental_samples; f__Uncultured_amoebophrya_None3294	0	0	0	0	0	0	0	0	0	1	0	0	3	0
Root; k__Eukaryota; p__Alveolata; c__Dinophyceae; o__Environmental_samples; f__Uncultured_amoebophrya_None3313	0	0	0	0	0	0	0	0	1	2	0	0	0	0
Root; k__Eukaryota; p__Alveolata; c__Dinophyceae; o__Environmental_samples; f__Uncultured_amoebophrya_None3385	0	0	0	0	0	0	0	0	4	0	0	0	0	0
Root; k__Eukaryota; p__Alveolata; c__Dinophyceae; o__Environmental_samples; f__Uncultured_amoebophrya_None3962	0	0	0	0	0	0	0	0	0	0	0	0	0	7
Root; k__Eukaryota; p__Alveolata; c__Dinophyceae; o__Environmental_samples; f__Uncultured_amoebophrya_None4291	0	0	0	0	0	0	0	1	4	0	0	0	0	2
Root; k__Eukaryota; p__Alveolata; c__Dinophyceae; o__Environmental_samples; f__Uncultured_amoebophrya_None5171	0	0	0	0	0	0	0	0	0	0	0	0	1	0
Root; k__Eukaryota; p__Alveolata; c__Dinophyceae; o__Environmental_samples; f__Uncultured_amoebophrya_None5269	0	0	0	0	0	0	0	0	2	1	0	1	0	1
Root; k__Eukaryota; p__Alveolata; c__Dinophyceae; o__Environmental_samples; f__Uncultured_amoebophrya_None5718	0	0	0	0	0	0	0	0	0	0	1	0	0	1
Root; k__Eukaryota; p__Alveolata; c__Dinophyceae; o__Environmental_samples; f__Uncultured_amoebophrya_None5719	0	0	0	0	0	0	0	0	0	0	1	0	0	0
Root; k__Eukaryota; p__Alveolata; c__Dinophyceae; o__Environmental_samples; f__Uncultured_amoebophrya_None5736	0	0	0	0	0	0	0	0	0	0	0	0	0	1
Root; k__Eukaryota; p__Alveolata; c__Dinophyceae; o__Environmental_samples; f__Uncultured_amoebophrya_None587	0	0	0	0	0	0	0	0	0	0	1	0	0	0
Root; k__Eukaryota; p__Alveolata; c__Dinophyceae; o__Environmental_samples; f__Uncultured_amoebophrya_None5947	0	0	0	0	0	0	0	0	0	0	0	2	0	0
Root; k__Eukaryota; p__Alveolata; c__Dinophyceae; o__Environmental_samples; f__Uncultured_amoebophrya_None6244	0	0	0	0	0	0	0	0	1	1	0	1	0	3
Root; k__Eukaryota; p__Alveolata; c__Dinophyceae; o__Environmental_samples; f__Uncultured_amoebophrya_None6280	0	0	0	0	0	0	0	0	0	0	0	4	0	1
Root; k__Eukaryota; p__Alveolata; c__Dinophyceae; o__Environmental_samples; f__Uncultured_amoebophrya_None6710	0	0	0	0	0	0	0	0	0	0	0	3	0	17
Root; k__Eukaryota; p__Alveolata; c__Dinophyceae; o__Environmental_samples; f__Uncultured_amoebophrya_None6748	0	0	0	0	0	0	0	0	0	0	1	0	0	0
Root; k__Eukaryota; p__Alveolata; c__Dinophyceae; o__Environmental_samples; f__Uncultured_amoebophrya_None708	0	0	0	0	0	0	0	0	0	1	0	0	0	0
Root; k__Eukaryota; p__Alveolata; c__Dinophyceae; o__Environmental_samples; f__Uncultured_amoebophrya_None7631	0	0	0	0	0	0	0	0	0	0	0	0	0	1
Root; k__Eukaryota; p__Alveolata; c__Dinophyceae; o__Environmental_samples; f__Uncultured_amoebophrya_None7651	0	0	0	0	0	0	0	0	1	1	0	0	0	0
Root; k__Eukaryota; p__Alveolata; c__Dinophyceae; o__Environmental_samples; f__Uncultured_amoebophrya_None8499	0	0	0	0	0	0	0	0	0	0	0	0	0	9
Root; k__Eukaryota; p__Alveolata; c__Dinophyceae; o__Environmental_samples; f__Uncultured_amoebophrya_None8540	0	0	0	0	0	0	0	0	0	0	0	1	0	0
Root; k__Eukaryota; p__Alveolata; c__Dinophyceae; o__Environmental_samples; f__Uncultured_amoebophrya_None866	0	0	0	0	0	0	0	0	0	1	0	0	1	0
Root; k__Eukaryota; p__Alveolata; c__Dinophyceae; o__Environmental_samples; f__Uncultured_amoebophrya_None9176	0	0	0	0	0	0	0	0	0	0	1	0	0	0
Root; k__Eukaryota; p__Alveolata; c__Dinophyceae; o__Environmental_samples; f__Uncultured_amoebophrya_None9189	0	0	0	0	0	0	0	0	0	0	0	0	0	2
Root; k__Eukaryota; p__Alveolata; c__Dinophyceae; o__Environmental_samples; f__Uncultured_amoebophrya_None9248	0	0	0	0	0	0	0	0	0	1	0	2	0	0
Root; k__Eukaryota; p__Alveolata; c__Dinophyceae; o__Environmental_samples; f__Uncultured_amoebophrya_None9914	0	0	1	1	0	0	0	0	1	1	4	3	1	1
Root; k__Eukaryota; p__Alveolata; c__Dinophyceae; o__Gonyaulacales; f__Ceratiaceae_None7660	2	0	0	0	0	0	0	0	0	0	0	0	0	40
Root; k__Eukaryota; p__Alveolata; c__Dinophyceae; o__Gymnodiniales; f__Gymnodiniaceae_32703	0	0	0	0	0	0	0	0	0	0	0	0	0	6
Root; k__Eukaryota; p__Alveolata; c__Dinophyceae; o__Gymnodiniales; f__Gymnodiniaceae_54776	2	0	0	0	4	0	0	0	0	0	0	0	0	375
Root; k__Eukaryota; p__Alveolata; c__Dinophyceae; o__Gymnodiniales; f__Gymnodiniaceae_None4118	0	0	0	0	0	0	0	0	0	0	0	0	0	3
Root; k__Eukaryota; p__Alveolata; c__Dinophyceae; o__Gymnodiniales; f__Gymnodiniaceae_None6157	0	0	0	0	0	0	0	0	0	0	0	0	0	5
Root; k__Eukaryota; p__Alveolata; c__Dinophyceae; o__Gymnodiniales; f__Gymnodiniaceae_None784	0	0	0	0	0	0	1	0	0	0	0	0	0	0
Root; k__Eukaryota; p__Alveolata; c__Dinophyceae; o__Gymnodiniales; f__Gymnodiniaceae_None9455	0	0	0	1	2	0	0	0	1	0	0	5	0	1
Root; k__Eukaryota; p__Alveolata; c__Dinophyceae; o__Peridiniales; f__Peridiniaceae_58411	0	0	0	0	0	0	2	1	0	0	0	0	0	0
Root; k__Eukaryota; p__Alveolata; c__Dinophyceae; o__Peridiniales; f__Peridiniaceae_75550	3	0	0	0	2	0	0	0	0	0	0	0	0	44
Root; k__Eukaryota; p__Alveolata; c__Dinophyceae; o__Peridiniales; f__Peridiniaceae_95365	0	0	0	0	0	0	0	0	0	0	0	0	0	51
Root; k__Eukaryota; p__Alveolata; c__Dinophyceae; o__Peridiniales; f__Peridiniaceae_None11102	0	0	0	0	1	0	0	0	0	0	0	0	0	0
Root; k__Eukaryota; p__Alveolata; c__Dinophyceae; o__Peridiniales; f__Peridiniaceae_None11866	4	0	0	0	4	0	0	0	0	0	0	0	0	31
Root; k__Eukaryota; p__Alveolata; c__Dinophyceae; o__Peridiniales; f__Peridiniaceae_None2622	0	0	0	0	0	0	0	0	0	1	0	0	0	0
Root; k__Eukaryota; p__Alveolata; c__Dinophyceae; o__Peridiniales; f__Peridiniaceae_None4809	0	0	0	0	0	0	0	0	0	0	0	0	0	7
Root; k__Eukaryota; p__Alveolata; c__Dinophyceae; o__Peridiniales; f__Peridiniaceae_None5715	0	0	0	0	2	0	0	0	0	0	0	0	0	0
Root; k__Eukaryota; p__Alveolata; c__Dinophyceae; o__Peridiniales; f__Peridiniaceae_None6175	0	0	0	0	0	0	0	0	0	0	0	0	0	6
Root; k__Eukaryota; p__Alveolata; c__Dinophyceae; o__Peridiniales; f__Peridiniaceae_None6993	0	0	0	0	0	0	0	0	0	7	0	0	0	19
Root; k__Eukaryota; p__Alveolata; c__Dinophyceae; o__Peridiniales; f__Peridiniaceae_None8554	6	0	0	0	3	0	0	0	0	7	0	0	0	58
Root; k__Eukaryota; p__Alveolata; c__Dinophyceae; o__Peridiniales; f__Peridiniaceae_None8611	0	0	0	0	0	0	0	0	0	0	2	0	0	0
Root; k__Eukaryota; p__Alveolata; c__Dinophyceae; o__Peridiniales; f__Peridiniaceae_None8987	0	0	0	0	0	0	0	0	0	0	0	0	0	6
Root; k__Eukaryota; p__Alveolata; c__Dinophyceae; o__Phytodiniales; f__Phytodiniaceae_None10974	0	0	0	0	0	0	1	0	0	0	0	0	0	0
Root; k__Eukaryota; p__Alveolata; c__Dinophyceae; o__Phytodiniales; f__Phytodiniaceae_None1852	0	0	0	0	0	1	1	0	0	0	0	0	0	0
Root; k__Eukaryota; p__Alveolata; c__Dinophyceae; o__Phytodiniales; f__Phytodiniaceae_None6654	0	0	0	0	0	0	0	0	0	0	3	0	0	0
Root; k__Eukaryota; p__Alveolata; c__Dinophyceae; o__Phytodiniales; f__Phytodiniaceae_None7446	0	0	0	0	0	6	8	3	0	0	1	1	0	0
Root; k__Eukaryota; p__Alveolata; c__Dinophyceae; o__Phytodiniales; f__Phytodiniaceae_None9125	0	0	0	0	0	0	1	0	0	0	0	0	0	0
Root; k__Eukaryota; p__Alveolata; c__Dinophyceae; o__Prorocentrales; f__Prorocentraceae_None96	0	0	0	0	0	0	1	0	0	0	0	0	0	0
Root; k__Eukaryota; p__Alveolata; c__Dinophyceae_22875	0	0	0	0	0	0	1	0	0	0	0	0	0	0
Root; k__Eukaryota; p__Alveolata; c__Dinophyceae_None10272	0	0	0	0	0	0	0	0	0	1	0	0	0	0
Root; k__Eukaryota; p__Alveolata; c__Dinophyceae_None10334	0	0	0	0	0	0	0	0	0	0	0	0	0	1
Root; k__Eukaryota; p__Alveolata; c__Dinophyceae_None10406	0	0	0	0	0	0	3	0	0	0	0	0	0	0
Root; k__Eukaryota; p__Alveolata; c__Dinophyceae_None10737	0	0	0	0	0	0	0	0	0	0	0	0	1	0
Root; k__Eukaryota; p__Alveolata; c__Dinophyceae_None11460	0	0	0	0	0	0	0	0	0	0	0	0	0	14
Root; k__Eukaryota; p__Alveolata; c__Dinophyceae_None11495	0	0	0	0	0	0	6	0	0	0	0	0	0	0
Root; k__Eukaryota; p__Alveolata; c__Dinophyceae_None1240	0	0	0	0	0	0	0	0	0	0	0	0	0	3
Root; k__Eukaryota; p__Alveolata; c__Dinophyceae_None1301	0	0	0	0	0	0	0	0	0	0	0	0	0	47
Root; k__Eukaryota; p__Alveolata; c__Dinophyceae_None1420	0	0	0	0	0	0	0	0	0	1	0	0	0	0
Root; k__Eukaryota; p__Alveolata; c__Dinophyceae_None1460	0	0	0	0	0	0	0	0	0	0	0	0	0	1
Root; k__Eukaryota; p__Alveolata; c__Dinophyceae_None1643	0	0	0	0	0	0	0	0	0	0	0	0	0	9
Root; k__Eukaryota; p__Alveolata; c__Dinophyceae_None1727	1	0	0	0	0	0	0	0	0	0	0	0	0	26
Root; k__Eukaryota; p__Alveolata; c__Dinophyceae_None1770	0	0	0	0	0	0	0	0	0	2	0	0	0	0
Root; k__Eukaryota; p__Alveolata; c__Dinophyceae_None1897	0	0	0	0	0	0	0	0	0	0	0	0	0	3
Root; k__Eukaryota; p__Alveolata; c__Dinophyceae_None2241	0	0	0	0	0	0	0	0	0	0	0	0	0	2
Root; k__Eukaryota; p__Alveolata; c__Dinophyceae_None2358	1	0	0	0	0	0	0	0	0	0	0	0	0	7
Root; k__Eukaryota; p__Alveolata; c__Dinophyceae_None2366	0	0	0	0	0	0	0	0	0	0	0	0	0	1
Root; k__Eukaryota; p__Alveolata; c__Dinophyceae_None2460	0	0	0	0	0	0	11	0	0	0	0	0	0	0
Root; k__Eukaryota; p__Alveolata; c__Dinophyceae_None2728	0	0	0	0	0	0	0	0	0	0	0	0	0	2
Root; k__Eukaryota; p__Alveolata; c__Dinophyceae_None2949	0	0	0	0	0	0	0	0	0	0	0	0	0	2
Root; k__Eukaryota; p__Alveolata; c__Dinophyceae_None2967	0	0	0	0	0	0	0	0	0	11	0	0	0	0
Root; k__Eukaryota; p__Alveolata; c__Dinophyceae_None2973	1	0	0	0	0	0	0	0	0	0	0	0	0	10
Root; k__Eukaryota; p__Alveolata; c__Dinophyceae_None3057	0	0	0	3	0	0	2	0	0	0	0	0	0	35
Root; k__Eukaryota; p__Alveolata; c__Dinophyceae_None3265	0	0	0	0	0	0	0	0	0	0	0	0	0	2
Root; k__Eukaryota; p__Alveolata; c__Dinophyceae_None3408	0	0	0	0	0	0	0	0	2	0	0	0	0	0
Root; k__Eukaryota; p__Alveolata; c__Dinophyceae_None3441	0	0	0	0	0	0	0	0	0	0	0	0	0	14
Root; k__Eukaryota; p__Alveolata; c__Dinophyceae_None3986	0	0	0	0	0	0	0	0	0	1	0	0	0	0
Root; k__Eukaryota; p__Alveolata; c__Dinophyceae_None4239	1	0	0	0	0	0	0	0	0	0	0	0	0	2
Root; k__Eukaryota; p__Alveolata; c__Dinophyceae_None4522	0	0	0	0	0	0	0	0	0	7	0	0	3	9
Root; k__Eukaryota; p__Alveolata; c__Dinophyceae_None4560	0	0	0	0	1	0	0	0	0	0	0	0	0	51
Root; k__Eukaryota; p__Alveolata; c__Dinophyceae_None4728	0	0	0	0	0	0	0	0	0	0	0	0	0	1
Root; k__Eukaryota; p__Alveolata; c__Dinophyceae_None4763	0	0	0	0	0	0	0	0	0	0	0	0	0	4
Root; k__Eukaryota; p__Alveolata; c__Dinophyceae_None4780	0	0	0	0	0	0	0	0	0	3	0	0	0	7
Root; k__Eukaryota; p__Alveolata; c__Dinophyceae_None4787	2	0	0	0	0	0	0	0	0	0	0	0	0	4
Root; k__Eukaryota; p__Alveolata; c__Dinophyceae_None4987	0	0	0	0	0	0	0	1	3	0	0	0	0	0
Root; k__Eukaryota; p__Alveolata; c__Dinophyceae_None5185	0	0	0	0	0	0	0	0	0	0	0	1	0	0
Root; k__Eukaryota; p__Alveolata; c__Dinophyceae_None5348	0	0	0	0	0	0	0	0	0	0	0	0	0	54
Root; k__Eukaryota; p__Alveolata; c__Dinophyceae_None5451	0	0	0	0	0	0	0	0	0	0	0	0	0	4
Root; k__Eukaryota; p__Alveolata; c__Dinophyceae_None5657	5	0	0	0	1	0	0	0	0	0	0	0	0	118
Root; k__Eukaryota; p__Alveolata; c__Dinophyceae_None6078	0	0	0	0	0	0	0	0	0	0	0	0	0	2
Root; k__Eukaryota; p__Alveolata; c__Dinophyceae_None6122	0	0	0	0	0	0	0	1	0	0	0	0	0	0
Root; k__Eukaryota; p__Alveolata; c__Dinophyceae_None6256	0	0	0	0	0	0	13	26	7	14	0	1	1	0
Root; k__Eukaryota; p__Alveolata; c__Dinophyceae_None6625	0	0	0	0	0	0	0	0	0	0	0	0	0	1
Root; k__Eukaryota; p__Alveolata; c__Dinophyceae_None6646	9	0	0	0	3	0	0	0	0	0	0	0	0	503
Root; k__Eukaryota; p__Alveolata; c__Dinophyceae_None6735	0	0	0	0	0	0	41	0	0	0	0	0	0	0
Root; k__Eukaryota; p__Alveolata; c__Dinophyceae_None6797	0	0	0	0	0	0	0	0	0	0	0	0	0	2
Root; k__Eukaryota; p__Alveolata; c__Dinophyceae_None6893	2	0	0	0	0	0	0	0	0	0	0	0	0	69
Root; k__Eukaryota; p__Alveolata; c__Dinophyceae_None6909	0	0	0	0	0	0	1	0	0	0	0	0	0	0
Root; k__Eukaryota; p__Alveolata; c__Dinophyceae_None6972	0	0	0	0	0	0	0	0	0	0	0	0	0	3
Root; k__Eukaryota; p__Alveolata; c__Dinophyceae_None7077	0	0	0	0	0	0	0	0	0	0	0	0	0	2
Root; k__Eukaryota; p__Alveolata; c__Dinophyceae_None770	0	0	0	0	0	0	0	0	2	11	0	0	0	0
Root; k__Eukaryota; p__Alveolata; c__Dinophyceae_None8195	0	0	0	0	0	0	0	0	0	0	0	0	0	1
Root; k__Eukaryota; p__Alveolata; c__Dinophyceae_None8267	0	0	0	0	4	0	0	0	0	25	0	0	0	0
Root; k__Eukaryota; p__Alveolata; c__Dinophyceae_None8270	6	0	0	0	0	0	0	0	0	0	0	0	0	0
Root; k__Eukaryota; p__Alveolata; c__Dinophyceae_None8480	0	0	0	0	0	0	0	0	0	1	0	0	0	0
Root; k__Eukaryota; p__Alveolata; c__Dinophyceae_None9210	0	0	0	0	0	0	0	0	0	0	0	0	0	1
Root; k__Eukaryota; p__Alveolata; c__Dinophyceae_None9250	0	0	0	0	0	0	2	0	0	0	0	0	0	0
Root; k__Eukaryota; p__Alveolata; c__Dinophyceae_None987	0	0	0	0	0	0	0	0	0	1	0	0	0	0
Root; k__Eukaryota; p__Alveolata; c__Environmental_samples; o__Uncultured_alveolate; f__Uncultured_alveolate_12441	2	1	0	2	4	1	4	1	0	3	4	3	0	4
Root; k__Eukaryota; p__Alveolata; c__Environmental_samples; o__Uncultured_alveolate; f__Uncultured_alveolate_24756	0	0	0	2	0	0	2	0	0	0	0	0	0	0
Root; k__Eukaryota; p__Alveolata; c__Environmental_samples; o__Uncultured_alveolate; f__Uncultured_alveolate_42023	0	0	0	0	0	0	0	0	0	0	0	0	0	12
Root; k__Eukaryota; p__Alveolata; c__Environmental_samples; o__Uncultured_alveolate; f__Uncultured_alveolate_45687	0	0	0	5	2	0	1	0	1	0	0	1	0	0
Root; k__Eukaryota; p__Alveolata; c__Environmental_samples; o__Uncultured_alveolate; f__Uncultured_alveolate_45810	0	0	1	0	0	0	0	0	0	0	1	0	0	23
Root; k__Eukaryota; p__Alveolata; c__Environmental_samples; o__Uncultured_alveolate; f__Uncultured_alveolate_None10450	0	0	0	0	0	0	0	0	0	0	0	0	0	3
Root; k__Eukaryota; p__Alveolata; c__Environmental_samples; o__Uncultured_alveolate; f__Uncultured_alveolate_None10525	0	0	0	2	0	0	0	0	1	0	0	0	0	0
Root; k__Eukaryota; p__Alveolata; c__Environmental_samples; o__Uncultured_alveolate; f__Uncultured_alveolate_None10793	0	0	0	0	2	0	0	0	0	0	0	0	1	29
Root; k__Eukaryota; p__Alveolata; c__Environmental_samples; o__Uncultured_alveolate; f__Uncultured_alveolate_None11856	0	0	0	0	0	0	0	0	0	0	0	0	0	10
Root; k__Eukaryota; p__Alveolata; c__Environmental_samples; o__Uncultured_alveolate; f__Uncultured_alveolate_None1491	0	0	0	0	0	0	0	0	0	0	0	0	0	2
Root; k__Eukaryota; p__Alveolata; c__Environmental_samples; o__Uncultured_alveolate; f__Uncultured_alveolate_None1969	0	2	0	14	0	2	0	0	0	0	0	0	0	0
Root; k__Eukaryota; p__Alveolata; c__Environmental_samples; o__Uncultured_alveolate; f__Uncultured_alveolate_None2415	0	0	0	0	0	0	2	0	0	12	0	0	0	1
Root; k__Eukaryota; p__Alveolata; c__Environmental_samples; o__Uncultured_alveolate; f__Uncultured_alveolate_None2427	0	0	0	0	0	0	0	0	0	0	0	0	0	1
Root; k__Eukaryota; p__Alveolata; c__Environmental_samples; o__Uncultured_alveolate; f__Uncultured_alveolate_None3009	0	0	0	0	0	0	0	0	0	0	0	0	0	2
Root; k__Eukaryota; p__Alveolata; c__Environmental_samples; o__Uncultured_alveolate; f__Uncultured_alveolate_None3062	0	0	0	19	7	1	0	0	0	0	4	6	0	0
Root; k__Eukaryota; p__Alveolata; c__Environmental_samples; o__Uncultured_alveolate; f__Uncultured_alveolate_None3140	0	0	0	0	0	0	0	0	0	0	0	3	0	56
Root; k__Eukaryota; p__Alveolata; c__Environmental_samples; o__Uncultured_alveolate; f__Uncultured_alveolate_None3520	0	0	0	0	0	0	0	0	0	0	0	0	0	2
Root; k__Eukaryota; p__Alveolata; c__Environmental_samples; o__Uncultured_alveolate; f__Uncultured_alveolate_None3532	0	0	0	0	0	0	0	0	0	0	1	0	0	0
Root; k__Eukaryota; p__Alveolata; c__Environmental_samples; o__Uncultured_alveolate; f__Uncultured_alveolate_None3669	0	0	0	0	0	0	0	0	0	0	0	5	3	35
Root; k__Eukaryota; p__Alveolata; c__Environmental_samples; o__Uncultured_alveolate; f__Uncultured_alveolate_None3744	0	0	0	0	3	0	0	0	0	0	0	10	0	0
Root; k__Eukaryota; p__Alveolata; c__Environmental_samples; o__Uncultured_alveolate; f__Uncultured_alveolate_None4140	22	0	0	0	0	0	0	0	0	0	0	0	0	0
Root; k__Eukaryota; p__Alveolata; c__Environmental_samples; o__Uncultured_alveolate; f__Uncultured_alveolate_None4263	0	0	0	0	0	0	0	0	0	0	0	0	2	5
Root; k__Eukaryota; p__Alveolata; c__Environmental_samples; o__Uncultured_alveolate; f__Uncultured_alveolate_None4929	0	0	0	0	0	0	0	0	0	0	0	0	0	1
Root; k__Eukaryota; p__Alveolata; c__Environmental_samples; o__Uncultured_alveolate; f__Uncultured_alveolate_None5690	0	0	0	0	0	3	0	0	0	0	0	0	0	0
Root; k__Eukaryota; p__Alveolata; c__Environmental_samples; o__Uncultured_alveolate; f__Uncultured_alveolate_None5729	0	0	0	2	0	0	0	0	0	0	0	0	0	0
Root; k__Eukaryota; p__Alveolata; c__Environmental_samples; o__Uncultured_alveolate; f__Uncultured_alveolate_None6580	0	0	0	0	1	0	0	0	0	0	0	0	0	0
Root; k__Eukaryota; p__Alveolata; c__Environmental_samples; o__Uncultured_alveolate; f__Uncultured_alveolate_None6606	0	0	0	1	0	0	0	0	0	0	0	0	0	0
Root; k__Eukaryota; p__Alveolata; c__Environmental_samples; o__Uncultured_alveolate; f__Uncultured_alveolate_None6683	0	0	0	0	0	0	2	0	0	0	0	0	0	0
Root; k__Eukaryota; p__Alveolata; c__Environmental_samples; o__Uncultured_alveolate; f__Uncultured_alveolate_None6806	0	0	0	0	0	0	0	0	0	0	0	0	0	8
Root; k__Eukaryota; p__Alveolata; c__Environmental_samples; o__Uncultured_alveolate; f__Uncultured_alveolate_None6931	1	0	0	0	4	0	0	0	0	0	1	1	0	0
Root; k__Eukaryota; p__Alveolata; c__Environmental_samples; o__Uncultured_alveolate; f__Uncultured_alveolate_None6973	0	0	0	2	0	0	0	0	0	0	0	0	0	0
Root; k__Eukaryota; p__Alveolata; c__Environmental_samples; o__Uncultured_alveolate; f__Uncultured_alveolate_None7387	0	0	1	0	0	0	0	0	0	0	0	0	0	0
Root; k__Eukaryota; p__Alveolata; c__Environmental_samples; o__Uncultured_alveolate; f__Uncultured_alveolate_None7434	0	0	0	0	0	0	0	0	0	0	0	0	0	1
Root; k__Eukaryota; p__Alveolata; c__Environmental_samples; o__Uncultured_alveolate; f__Uncultured_alveolate_None7627	0	0	0	0	0	0	0	0	0	0	0	0	0	2
Root; k__Eukaryota; p__Alveolata; c__Environmental_samples; o__Uncultured_alveolate; f__Uncultured_alveolate_None7762	0	0	0	0	0	0	0	0	0	0	2	0	0	0
Root; k__Eukaryota; p__Alveolata; c__Environmental_samples; o__Uncultured_alveolate; f__Uncultured_alveolate_None7835	0	0	0	0	0	0	0	0	0	0	0	0	0	4
Root; k__Eukaryota; p__Alveolata; c__Environmental_samples; o__Uncultured_alveolate; f__Uncultured_alveolate_None8197	0	2	0	0	0	0	0	0	1	0	0	0	0	0
Root; k__Eukaryota; p__Alveolata; c__Environmental_samples; o__Uncultured_alveolate; f__Uncultured_alveolate_None8825	0	0	0	0	0	0	0	0	0	0	0	0	0	1
Root; k__Eukaryota; p__Alveolata; c__Environmental_samples; o__Uncultured_alveolate; f__Uncultured_alveolate_None9019	0	0	0	0	0	0	0	0	0	0	0	0	0	2
Root; k__Eukaryota; p__Alveolata; c__Environmental_samples; o__Uncultured_alveolate; f__Uncultured_alveolate_None9197	0	3	0	0	0	0	0	0	0	0	0	0	0	0
Root; k__Eukaryota; p__Alveolata; c__Environmental_samples; o__Uncultured_alveolate; f__Uncultured_alveolate_None9239	0	0	0	0	0	0	0	0	0	1	0	0	0	0
Root; k__Eukaryota; p__Alveolata; c__Environmental_samples; o__Uncultured_alveolate; f__Uncultured_alveolate_None9352	0	0	0	0	0	0	1	0	0	0	0	0	0	0
Root; k__Eukaryota; p__Alveolata; c__Environmental_samples; o__Uncultured_alveolate; f__Uncultured_alveolate_None965	0	0	0	0	0	0	2	0	0	0	0	0	0	0
Root; k__Eukaryota; p__Alveolata; c__Environmental_samples; o__Uncultured_alveolate; f__Uncultured_alveolate_None9728	0	0	0	0	0	0	0	0	0	0	0	0	0	7
Root; k__Eukaryota; p__Alveolata; c__Environmental_samples; o__Uncultured_alveolate; f__Uncultured_alveolate_None9884	0	0	0	0	0	0	0	0	0	0	0	0	0	2
Root; k__Eukaryota; p__Alveolata; c__Perkinsea; o__Unclassified_perkinsea; f__Uncultured_perkinsea_None4799	0	0	0	0	0	0	0	0	0	0	0	0	0	1
Root; k__Eukaryota; p__Alveolata; c__Voromonas; o__Voromonas_pontica; f__Voromonas_pontica_None10696	0	0	0	0	3	0	0	0	0	0	0	0	0	0
Root; k__Eukaryota; p__Alveolata; c__Voromonas; o__Voromonas_pontica; f__Voromonas_pontica_None1487	0	0	0	1	0	0	0	0	0	0	0	0	0	0
Root; k__Eukaryota; p__Alveolata_61053	0	0	0	0	0	0	0	0	0	0	0	0	0	1537
Root; k__Eukaryota; p__Alveolata_85571	0	0	0	0	0	0	0	0	0	0	0	0	0	43
Root; k__Eukaryota; p__Alveolata_93677	3	0	0	0	2	0	0	0	0	0	0	0	0	18
Root; k__Eukaryota; p__Alveolata_None10084	0	0	0	0	0	0	0	0	0	0	0	0	0	6
Root; k__Eukaryota; p__Alveolata_None10147	0	0	0	0	2	0	0	0	0	0	0	0	0	0
Root; k__Eukaryota; p__Alveolata_None10163	0	0	0	0	0	0	0	0	0	0	0	0	0	1
Root; k__Eukaryota; p__Alveolata_None1024	0	0	0	0	0	0	0	0	1	0	0	1	0	0
Root; k__Eukaryota; p__Alveolata_None10468	0	0	0	0	1	0	0	0	0	0	0	0	1	0
Root; k__Eukaryota; p__Alveolata_None10484	0	0	0	0	0	0	0	0	0	0	0	0	0	3
Root; k__Eukaryota; p__Alveolata_None10538	0	0	0	0	0	0	0	0	0	1	0	0	0	0
Root; k__Eukaryota; p__Alveolata_None10711	0	0	0	0	0	0	0	1	0	0	0	0	0	0
Root; k__Eukaryota; p__Alveolata_None10790	0	0	0	0	0	0	0	0	0	0	0	0	0	2
Root; k__Eukaryota; p__Alveolata_None10834	0	0	0	0	0	0	1	0	0	0	0	0	0	0
Root; k__Eukaryota; p__Alveolata_None10921	0	0	0	0	0	0	0	0	0	0	1	0	0	0
Root; k__Eukaryota; p__Alveolata_None10926	0	0	0	0	0	0	0	0	0	0	0	0	0	1
Root; k__Eukaryota; p__Alveolata_None10933	0	0	0	0	0	0	0	2	0	0	1	0	0	0
Root; k__Eukaryota; p__Alveolata_None1096	0	0	1	0	0	0	0	0	0	0	0	0	0	0
Root; k__Eukaryota; p__Alveolata_None10981	0	0	0	0	0	0	0	0	0	0	0	0	0	2
Root; k__Eukaryota; p__Alveolata_None1103	0	0	0	0	0	0	0	0	0	0	0	0	0	5
Root; k__Eukaryota; p__Alveolata_None11061	0	0	0	0	0	0	0	0	1	0	0	0	0	0
Root; k__Eukaryota; p__Alveolata_None11408	0	0	0	0	0	0	0	0	0	0	0	0	0	1
Root; k__Eukaryota; p__Alveolata_None11465	0	0	1	0	0	0	0	0	0	0	0	0	0	0
Root; k__Eukaryota; p__Alveolata_None1155	0	0	0	0	0	0	0	0	0	0	7	0	0	0
Root; k__Eukaryota; p__Alveolata_None11676	0	0	0	0	0	0	0	0	0	0	0	0	0	1
Root; k__Eukaryota; p__Alveolata_None11696	0	0	1	0	0	0	0	0	0	0	0	0	0	0
Root; k__Eukaryota; p__Alveolata_None11779	0	0	0	0	1	0	0	0	0	0	0	0	0	0
Root; k__Eukaryota; p__Alveolata_None11833	0	0	0	0	0	0	0	0	0	0	0	0	0	5
Root; k__Eukaryota; p__Alveolata_None11913	0	0	0	0	0	0	0	0	0	0	1	0	0	0
Root; k__Eukaryota; p__Alveolata_None12008	0	0	0	0	0	0	0	0	2	0	0	0	0	0
Root; k__Eukaryota; p__Alveolata_None121	0	0	0	0	0	0	0	0	0	0	2	0	0	0
Root; k__Eukaryota; p__Alveolata_None1348	0	0	0	0	0	0	0	0	1	0	0	0	0	0
Root; k__Eukaryota; p__Alveolata_None1364	0	0	0	0	0	0	0	0	0	0	1	0	0	0
Root; k__Eukaryota; p__Alveolata_None1367	0	0	0	0	2	0	0	0	0	0	0	0	0	0
Root; k__Eukaryota; p__Alveolata_None14	0	0	0	0	0	0	0	0	0	1	0	0	0	0
Root; k__Eukaryota; p__Alveolata_None1400	0	0	0	0	0	0	0	0	0	0	0	0	0	4
Root; k__Eukaryota; p__Alveolata_None1470	0	0	0	0	0	0	0	0	0	0	1	0	0	0
Root; k__Eukaryota; p__Alveolata_None1473	0	0	0	0	0	0	0	0	0	0	0	0	0	1
Root; k__Eukaryota; p__Alveolata_None1498	0	0	0	0	0	0	0	0	0	0	1	0	0	0
Root; k__Eukaryota; p__Alveolata_None1550	0	0	0	0	0	0	0	0	0	0	0	0	0	1
Root; k__Eukaryota; p__Alveolata_None1581	0	0	3	0	0	0	0	0	0	0	0	0	0	0
Root; k__Eukaryota; p__Alveolata_None1647	0	0	0	0	0	0	1	1	0	1	0	0	0	0
Root; k__Eukaryota; p__Alveolata_None1679	0	0	0	0	0	0	0	0	0	0	0	2	0	0
Root; k__Eukaryota; p__Alveolata_None1792	0	0	0	0	0	0	0	0	0	0	1	0	0	0
Root; k__Eukaryota; p__Alveolata_None1840	0	0	0	0	0	0	1	0	1	0	0	0	0	0
Root; k__Eukaryota; p__Alveolata_None1858	0	0	0	0	0	0	0	0	0	0	0	0	0	3
Root; k__Eukaryota; p__Alveolata_None1891	0	0	0	0	0	0	1	0	0	0	0	0	0	0
Root; k__Eukaryota; p__Alveolata_None1914	0	0	0	0	0	0	0	0	0	2	0	0	0	0
Root; k__Eukaryota; p__Alveolata_None1928	0	0	0	0	0	0	0	0	1	0	0	0	0	0
Root; k__Eukaryota; p__Alveolata_None1959	0	0	0	0	0	0	0	0	0	0	0	0	0	4
Root; k__Eukaryota; p__Alveolata_None1997	0	0	0	0	0	0	0	0	0	0	0	0	0	1
Root; k__Eukaryota; p__Alveolata_None2044	0	0	0	0	2	0	0	0	0	0	0	0	0	1
Root; k__Eukaryota; p__Alveolata_None2049	0	0	0	0	0	0	0	0	0	0	0	0	0	1
Root; k__Eukaryota; p__Alveolata_None2097	0	0	0	0	0	0	4	0	0	0	0	0	0	0
Root; k__Eukaryota; p__Alveolata_None2137	0	0	0	0	0	0	0	0	0	0	0	0	0	3
Root; k__Eukaryota; p__Alveolata_None2143	0	0	0	0	0	0	0	0	0	0	0	5	0	0
Root; k__Eukaryota; p__Alveolata_None2168	0	0	0	0	0	0	0	0	0	0	0	0	1	0
Root; k__Eukaryota; p__Alveolata_None2279	0	0	0	2	0	0	3	0	0	107	11	0	0	5
Root; k__Eukaryota; p__Alveolata_None2312	0	0	0	0	0	0	0	0	0	0	0	0	0	1
Root; k__Eukaryota; p__Alveolata_None2379	1	0	0	0	0	0	0	0	0	0	0	0	0	1
Root; k__Eukaryota; p__Alveolata_None2412	0	0	0	0	0	0	0	0	0	1	4	0	0	0
Root; k__Eukaryota; p__Alveolata_None2494	0	0	0	0	0	0	0	0	0	0	0	0	0	1
Root; k__Eukaryota; p__Alveolata_None2509	0	0	0	0	0	0	0	1	0	0	0	0	0	0
Root; k__Eukaryota; p__Alveolata_None2587	0	0	0	0	0	0	0	0	0	0	1	0	0	0
Root; k__Eukaryota; p__Alveolata_None2713	0	0	0	0	0	0	0	0	0	0	0	0	0	1
Root; k__Eukaryota; p__Alveolata_None2810	0	0	0	0	0	0	0	0	0	0	0	1	0	7
Root; k__Eukaryota; p__Alveolata_None2817	0	0	0	0	0	0	1	0	4	0	0	0	0	0
Root; k__Eukaryota; p__Alveolata_None2843	0	0	0	0	0	0	0	1	0	0	0	1	0	1
Root; k__Eukaryota; p__Alveolata_None2928	0	0	0	0	0	0	0	0	0	0	0	1	0	0
Root; k__Eukaryota; p__Alveolata_None2932	0	0	0	0	0	0	0	5	0	0	0	0	0	0
Root; k__Eukaryota; p__Alveolata_None3159	0	0	0	0	0	0	3	0	0	0	2	1	0	0
Root; k__Eukaryota; p__Alveolata_None3191	0	0	0	0	0	0	0	0	0	0	0	0	0	7
Root; k__Eukaryota; p__Alveolata_None3197	0	0	0	0	0	0	0	0	0	0	2	4	0	0
Root; k__Eukaryota; p__Alveolata_None3226	0	0	0	0	0	0	0	0	0	0	0	0	0	2
Root; k__Eukaryota; p__Alveolata_None3261	0	0	0	0	5	0	0	0	0	0	0	0	3	0
Root; k__Eukaryota; p__Alveolata_None3324	0	0	0	0	0	0	0	0	0	0	0	0	0	2
Root; k__Eukaryota; p__Alveolata_None3387	0	0	0	0	0	0	0	0	1	1	5	0	0	0
Root; k__Eukaryota; p__Alveolata_None3507	0	0	0	0	0	0	0	0	0	0	0	0	0	2
Root; k__Eukaryota; p__Alveolata_None3530	0	0	0	0	0	0	1	0	0	0	0	0	0	0
Root; k__Eukaryota; p__Alveolata_None3631	0	0	0	0	0	0	0	0	0	1	0	0	0	0
Root; k__Eukaryota; p__Alveolata_None3638	0	0	0	0	0	0	0	0	2	0	1	0	0	0
Root; k__Eukaryota; p__Alveolata_None3765	0	0	0	0	0	0	0	0	3	0	0	0	0	0
Root; k__Eukaryota; p__Alveolata_None378	0	0	0	0	0	0	0	0	0	0	1	0	0	0
Root; k__Eukaryota; p__Alveolata_None3903	0	0	0	0	0	0	1	1	0	0	0	0	0	0
Root; k__Eukaryota; p__Alveolata_None3915	0	0	0	0	0	0	0	0	0	0	0	0	1	0
Root; k__Eukaryota; p__Alveolata_None3943	0	0	0	0	0	0	0	0	0	0	1	0	0	0
Root; k__Eukaryota; p__Alveolata_None3993	0	0	0	0	0	0	0	0	0	0	1	15	0	0
Root; k__Eukaryota; p__Alveolata_None4012	0	0	0	0	0	0	0	0	0	0	1	0	0	0
Root; k__Eukaryota; p__Alveolata_None4065	0	0	0	0	0	0	0	0	0	0	0	0	0	2
Root; k__Eukaryota; p__Alveolata_None4105	0	0	0	0	0	0	0	0	0	0	0	1	0	0
Root; k__Eukaryota; p__Alveolata_None4176	0	0	0	0	0	0	0	0	0	0	0	0	0	1
Root; k__Eukaryota; p__Alveolata_None4206	0	0	0	0	0	0	1	0	0	0	0	0	0	7
Root; k__Eukaryota; p__Alveolata_None4229	0	0	0	0	0	0	0	0	0	2	1	0	0	0
Root; k__Eukaryota; p__Alveolata_None4234	0	0	0	0	0	0	0	0	0	3	0	0	0	0
Root; k__Eukaryota; p__Alveolata_None4328	0	0	1	2	0	0	0	0	0	0	1	0	1	0
Root; k__Eukaryota; p__Alveolata_None4373	0	0	0	0	0	0	0	0	0	0	0	0	0	11
Root; k__Eukaryota; p__Alveolata_None4389	0	0	0	0	0	0	0	0	0	0	0	0	0	6
Root; k__Eukaryota; p__Alveolata_None4401	0	0	0	0	0	0	0	0	0	0	0	0	0	7
Root; k__Eukaryota; p__Alveolata_None4726	0	0	0	0	0	0	0	1	0	0	0	0	0	0
Root; k__Eukaryota; p__Alveolata_None4848	0	0	0	1	0	0	0	0	0	1	0	0	0	3
Root; k__Eukaryota; p__Alveolata_None4857	0	0	0	0	0	0	0	0	0	0	0	0	1	0
Root; k__Eukaryota; p__Alveolata_None488	0	0	0	0	0	0	1	2	0	0	0	0	0	0
Root; k__Eukaryota; p__Alveolata_None4915	0	0	0	0	0	0	0	0	0	0	0	0	0	3
Root; k__Eukaryota; p__Alveolata_None4990	0	0	0	0	0	0	0	0	0	0	0	0	0	11
Root; k__Eukaryota; p__Alveolata_None5073	0	0	0	0	0	0	1	0	2	0	0	0	0	0
Root; k__Eukaryota; p__Alveolata_None5095	0	0	0	0	0	0	0	0	1	0	0	0	0	0
Root; k__Eukaryota; p__Alveolata_None510	0	0	0	0	0	0	0	1	0	2	0	0	0	0
Root; k__Eukaryota; p__Alveolata_None5132	0	0	0	0	0	0	0	0	0	0	2	7	0	0
Root; k__Eukaryota; p__Alveolata_None5143	0	0	0	0	0	0	0	0	0	0	0	0	0	1
Root; k__Eukaryota; p__Alveolata_None5288	0	0	0	0	0	0	0	0	0	0	0	0	0	1
Root; k__Eukaryota; p__Alveolata_None5334	0	0	0	0	0	0	0	0	0	0	0	0	0	6
Root; k__Eukaryota; p__Alveolata_None5469	0	0	0	0	0	0	0	0	0	0	2	0	0	0
Root; k__Eukaryota; p__Alveolata_None5521	0	0	0	0	0	0	0	0	0	0	0	0	1	0
Root; k__Eukaryota; p__Alveolata_None5592	0	0	0	0	0	0	3	0	0	0	0	0	0	5
Root; k__Eukaryota; p__Alveolata_None5601	0	0	0	0	0	0	0	0	0	0	0	0	0	2
Root; k__Eukaryota; p__Alveolata_None5617	0	0	0	0	0	0	0	0	0	0	0	0	0	1
Root; k__Eukaryota; p__Alveolata_None568	0	0	0	0	0	0	0	0	1	0	0	0	0	1
Root; k__Eukaryota; p__Alveolata_None571	0	0	0	0	0	0	0	0	0	0	0	0	0	3
Root; k__Eukaryota; p__Alveolata_None5743	0	0	0	0	0	0	0	0	0	0	0	0	0	7
Root; k__Eukaryota; p__Alveolata_None5804	0	0	0	0	0	0	0	0	0	0	0	0	0	1
Root; k__Eukaryota; p__Alveolata_None5845	0	0	0	0	0	0	0	0	0	0	0	0	0	12
Root; k__Eukaryota; p__Alveolata_None5885	0	0	0	0	0	0	0	0	0	0	0	0	1	8
Root; k__Eukaryota; p__Alveolata_None5900	0	0	0	0	0	0	0	0	0	0	0	1	0	0
Root; k__Eukaryota; p__Alveolata_None5945	0	0	0	0	0	0	0	2	0	0	0	1	0	0
Root; k__Eukaryota; p__Alveolata_None597	0	0	1	1	4	0	1	0	0	0	0	0	0	0
Root; k__Eukaryota; p__Alveolata_None5983	0	0	0	0	0	0	0	0	0	0	0	0	0	1
Root; k__Eukaryota; p__Alveolata_None5985	0	0	0	0	0	0	0	1	0	1	0	0	0	0
Root; k__Eukaryota; p__Alveolata_None60	0	0	0	0	0	0	0	0	0	0	3	0	0	0
Root; k__Eukaryota; p__Alveolata_None6050	0	0	0	0	0	0	5	5	6	7	23	1	0	0
Root; k__Eukaryota; p__Alveolata_None6071	0	0	0	1	0	0	0	0	0	0	0	0	0	0
Root; k__Eukaryota; p__Alveolata_None6118	0	0	0	0	0	0	0	0	0	1	1	0	0	0
Root; k__Eukaryota; p__Alveolata_None6121	0	0	0	0	0	0	0	0	0	0	0	0	0	3
Root; k__Eukaryota; p__Alveolata_None6210	0	0	0	0	0	0	0	0	0	0	2	4	0	1
Root; k__Eukaryota; p__Alveolata_None6281	0	0	0	0	1	0	0	0	0	0	0	0	0	0
Root; k__Eukaryota; p__Alveolata_None6422	0	0	0	0	0	0	0	0	0	0	0	0	0	2
Root; k__Eukaryota; p__Alveolata_None6592	0	0	0	0	0	0	0	0	0	0	1	0	0	0
Root; k__Eukaryota; p__Alveolata_None6839	0	0	0	0	0	0	0	0	0	0	0	0	0	2
Root; k__Eukaryota; p__Alveolata_None6861	0	0	0	0	0	0	0	1	0	0	0	0	0	0
Root; k__Eukaryota; p__Alveolata_None6957	0	2	0	0	0	0	0	0	0	0	0	0	0	0
Root; k__Eukaryota; p__Alveolata_None7075	0	0	0	0	0	0	0	0	0	0	0	0	0	2
Root; k__Eukaryota; p__Alveolata_None7144	0	0	0	0	0	0	0	0	0	0	2	0	0	0
Root; k__Eukaryota; p__Alveolata_None7159	0	0	0	0	0	0	0	0	0	0	0	0	0	4
Root; k__Eukaryota; p__Alveolata_None7187	0	0	0	0	0	0	0	0	0	0	0	0	0	1
Root; k__Eukaryota; p__Alveolata_None7346	0	0	0	2	0	0	1	0	0	0	0	0	0	0
Root; k__Eukaryota; p__Alveolata_None7385	0	0	0	0	0	0	0	1	0	0	0	0	0	0
Root; k__Eukaryota; p__Alveolata_None7516	0	0	0	0	0	0	0	0	0	3	0	0	0	1
Root; k__Eukaryota; p__Alveolata_None7571	0	0	0	0	0	0	0	0	0	0	0	0	0	3
Root; k__Eukaryota; p__Alveolata_None7610	0	0	0	0	0	0	0	3	0	0	0	3	0	0
Root; k__Eukaryota; p__Alveolata_None7692	0	0	0	0	2	0	0	0	0	0	0	0	0	0
Root; k__Eukaryota; p__Alveolata_None7719	0	0	0	0	0	0	0	0	0	0	0	0	0	7
Root; k__Eukaryota; p__Alveolata_None7768	0	0	0	0	0	0	0	1	0	0	0	0	0	0
Root; k__Eukaryota; p__Alveolata_None780	0	0	0	0	0	0	0	0	0	0	0	2	0	2
Root; k__Eukaryota; p__Alveolata_None7863	0	0	0	0	0	0	0	0	0	0	1	0	0	0
Root; k__Eukaryota; p__Alveolata_None7870	0	0	0	0	0	0	0	0	0	1	2	0	0	0
Root; k__Eukaryota; p__Alveolata_None7913	0	2	0	0	0	0	0	2	0	1	0	0	0	2
Root; k__Eukaryota; p__Alveolata_None8022	0	0	0	0	0	0	0	1	4	0	2	1	0	28
Root; k__Eukaryota; p__Alveolata_None8063	0	0	0	0	0	0	0	0	0	0	1	0	0	0
Root; k__Eukaryota; p__Alveolata_None8118	0	0	0	0	0	0	1	0	0	0	0	0	0	0
Root; k__Eukaryota; p__Alveolata_None8123	0	0	0	6	0	0	0	0	0	0	0	0	0	0
Root; k__Eukaryota; p__Alveolata_None8160	0	0	0	0	0	0	0	0	0	0	0	0	0	13
Root; k__Eukaryota; p__Alveolata_None8161	0	0	0	0	0	0	0	0	0	0	0	0	0	4
Root; k__Eukaryota; p__Alveolata_None8209	0	1	0	0	0	0	0	0	0	0	0	0	0	0
Root; k__Eukaryota; p__Alveolata_None8224	0	0	0	0	0	0	0	0	0	0	0	0	0	5
Root; k__Eukaryota; p__Alveolata_None8246	0	0	0	0	0	0	0	0	0	0	0	4	0	0
Root; k__Eukaryota; p__Alveolata_None8402	0	0	0	0	0	0	0	0	0	0	2	0	0	0
Root; k__Eukaryota; p__Alveolata_None844	0	0	0	0	0	0	0	0	0	0	0	0	0	1
Root; k__Eukaryota; p__Alveolata_None8501	0	0	0	0	0	0	0	2	0	0	0	0	0	0
Root; k__Eukaryota; p__Alveolata_None8581	0	0	0	0	0	0	0	0	0	0	0	0	0	2
Root; k__Eukaryota; p__Alveolata_None8605	0	0	0	0	0	0	0	0	0	0	0	0	1	2
Root; k__Eukaryota; p__Alveolata_None8746	0	0	0	0	0	0	0	0	4	0	0	0	0	0
Root; k__Eukaryota; p__Alveolata_None8788	0	0	0	0	0	0	0	0	0	0	1	5	0	0
Root; k__Eukaryota; p__Alveolata_None8810	0	0	0	0	0	0	2	0	0	0	0	0	0	0
Root; k__Eukaryota; p__Alveolata_None8913	0	0	0	0	0	0	0	0	0	1	0	0	0	1
Root; k__Eukaryota; p__Alveolata_None8926	0	0	0	1	0	0	0	0	0	0	0	0	0	0
Root; k__Eukaryota; p__Alveolata_None8928	0	0	0	0	0	0	0	0	0	0	0	1	0	0
Root; k__Eukaryota; p__Alveolata_None8992	0	0	0	1	0	0	0	0	1	0	0	0	0	0
Root; k__Eukaryota; p__Alveolata_None9006	0	0	0	0	0	0	0	0	1	0	0	0	0	0
Root; k__Eukaryota; p__Alveolata_None9088	0	0	0	0	0	0	0	0	0	0	0	0	0	12
Root; k__Eukaryota; p__Alveolata_None9159	1	0	0	0	0	0	0	0	0	0	0	0	0	3
Root; k__Eukaryota; p__Alveolata_None9410	0	0	0	0	0	0	0	0	0	0	0	0	0	2
Root; k__Eukaryota; p__Alveolata_None9444	0	0	0	0	0	0	0	0	0	0	0	0	0	2
Root; k__Eukaryota; p__Alveolata_None9478	0	0	0	0	0	0	0	0	0	0	0	0	0	27
Root; k__Eukaryota; p__Alveolata_None9526	0	0	0	0	0	0	0	0	0	0	0	0	0	5
Root; k__Eukaryota; p__Alveolata_None9574	0	0	0	0	1	0	0	0	0	0	0	0	0	0
Root; k__Eukaryota; p__Alveolata_None967	0	0	0	0	0	0	0	0	0	0	1	0	0	0
Root; k__Eukaryota; p__Alveolata_None9727	0	0	0	0	0	0	0	0	0	0	1	1	0	0
Root; k__Eukaryota; p__Alveolata_None9753	0	0	0	0	0	0	0	0	0	0	0	0	0	6
Root; k__Eukaryota; p__Alveolata_None9758	0	0	0	23	0	2	1	0	0	6	0	0	1	7
Root; k__Eukaryota; p__Alveolata_None9864	0	0	0	0	0	0	0	0	0	0	0	0	0	20
Root; k__Eukaryota; p__Alveolata_None9894	0	0	0	0	0	1	0	0	0	0	0	0	0	0
Root; k__Eukaryota; p__Alveolata_None9933	0	0	0	0	0	0	1	0	0	0	0	0	0	19
Root; k__Eukaryota; p__Alveolata_None9969	0	0	0	0	0	0	0	0	0	0	0	0	0	1
Root; k__Eukaryota; p__Alveolata_None9977	0	0	0	0	0	0	0	0	0	0	0	0	0	8
Root; k__Eukaryota; p__Alveolata_None9985	0	0	0	0	0	0	0	0	2	0	0	0	0	0
Root; k__Eukaryota; p__Alveolata_None9997	0	0	0	0	0	0	0	0	0	0	0	4	0	2
Root; k__Eukaryota; p__Alveolata_None9998	0	0	0	0	0	0	0	0	0	0	1	0	0	0
Root; k__Eukaryota; p__Amoebozoa; c__Centramoebida; o__Acanthamoebidae; f__Acanthamoeba_39216	0	0	0	0	3	0	0	0	0	0	0	0	0	0
Root; k__Eukaryota; p__Amoebozoa; c__Centramoebida; o__Acanthamoebidae; f__Acanthamoeba_8133	0	0	0	0	0	0	0	0	1	0	0	0	0	0
Root; k__Eukaryota; p__Amoebozoa; c__Centramoebida; o__Acanthamoebidae; f__Acanthamoeba_None1566	0	0	0	0	0	0	0	0	1	0	0	0	0	0
Root; k__Eukaryota; p__Amoebozoa; c__Centramoebida; o__Acanthamoebidae; f__Acanthamoeba_None4959	0	0	0	0	0	0	0	0	1	0	0	0	0	0
Root; k__Eukaryota; p__Amoebozoa; c__Flabellinea; o__Dactylopodida; f__Vexilliferidae_None10924	0	0	0	0	0	0	0	0	0	0	0	0	0	11
Root; k__Eukaryota; p__Amoebozoa; c__Flabellinea; o__Vannellidae; f__Platyamoeba_None1867	0	0	0	1	0	0	0	0	0	0	0	0	0	0
Root; k__Eukaryota; p__Amoebozoa; c__Phalansterium; o__Phalansterium_solitarium; f__Phalansterium_solitarium_None7310	0	0	0	0	0	0	0	0	0	0	0	0	0	4
Root; k__Eukaryota; p__Amoebozoa; c__Tubulinea; o__Euamoebida; f__Leptomyxida_None6120	0	0	0	4	0	0	0	0	0	0	0	0	0	0
Root; k__Eukaryota; p__Amoebozoa; c__Tubulinea; o__Euamoebida; f__Tubulinida_27149	0	0	0	0	0	0	0	0	0	0	0	1	0	4
Root; k__Eukaryota; p__Amoebozoa; c__Tubulinea; o__Euamoebida; f__Tubulinida_86761	0	0	0	2	2	2	1	0	1	0	0	0	0	2
Root; k__Eukaryota; p__Amoebozoa; c__Tubulinea; o__Euamoebida; f__Tubulinida_None1044	0	0	0	0	0	0	0	0	0	0	1	0	0	0
Root; k__Eukaryota; p__Amoebozoa; c__Tubulinea; o__Euamoebida; f__Tubulinida_None11036	1	0	0	0	0	0	0	0	0	1	0	1	0	3
Root; k__Eukaryota; p__Amoebozoa; c__Tubulinea; o__Euamoebida; f__Tubulinida_None11439	0	0	0	0	0	0	0	0	1	0	0	0	0	0
Root; k__Eukaryota; p__Amoebozoa; c__Tubulinea; o__Euamoebida; f__Tubulinida_None2073	0	0	0	0	0	0	0	0	1	0	0	0	0	0
Root; k__Eukaryota; p__Amoebozoa; c__Tubulinea; o__Euamoebida; f__Tubulinida_None2799	1	0	0	0	0	0	0	0	0	0	0	0	0	1
Root; k__Eukaryota; p__Amoebozoa; c__Tubulinea; o__Euamoebida; f__Tubulinida_None2888	0	0	0	0	0	0	0	0	0	0	0	0	0	3
Root; k__Eukaryota; p__Amoebozoa; c__Tubulinea; o__Euamoebida; f__Tubulinida_None3922	0	0	0	0	0	0	0	0	0	0	0	1	0	0
Root; k__Eukaryota; p__Amoebozoa; c__Tubulinea; o__Euamoebida; f__Tubulinida_None4890	0	0	0	2	0	0	0	0	0	0	0	0	1	3
Root; k__Eukaryota; p__Amoebozoa; c__Tubulinea; o__Euamoebida; f__Tubulinida_None5046	0	0	0	0	0	0	0	0	1	0	0	0	0	0
Root; k__Eukaryota; p__Amoebozoa; c__Tubulinea; o__Euamoebida; f__Tubulinida_None5275	0	0	0	0	0	0	0	0	0	0	0	0	0	1
Root; k__Eukaryota; p__Amoebozoa; c__Tubulinea; o__Euamoebida; f__Tubulinida_None55	1	1	0	3	0	9	3	0	0	0	0	0	0	11
Root; k__Eukaryota; p__Amoebozoa; c__Tubulinea; o__Euamoebida; f__Tubulinida_None6581	0	0	0	2	0	0	0	0	0	0	0	0	0	0
Root; k__Eukaryota; p__Amoebozoa; c__Tubulinea; o__Euamoebida; f__Tubulinida_None8012	0	0	0	0	0	0	1	0	0	0	0	0	0	0
Root; k__Eukaryota; p__Amoebozoa; c__Tubulinea; o__Euamoebida; f__Tubulinida_None9080	0	0	0	0	0	0	0	3	1	0	0	1	0	1
Root; k__Eukaryota; p__Apusozoa; c__Ancyromonadidae; o__Ancyromonas; f__Ancyromonas_howeae_62059	0	0	0	4	2	0	2	1	6	0	0	1	0	10
Root; k__Eukaryota; p__Apusozoa; c__Ancyromonadidae; o__Ancyromonas; f__Ancyromonas_howeae_None11026	0	0	0	0	0	0	0	1	0	0	0	0	0	0
Root; k__Eukaryota; p__Apusozoa; c__Ancyromonadidae; o__Ancyromonas; f__Ancyromonas_howeae_None1617	0	0	0	1	0	0	1	0	2	0	0	0	0	1
Root; k__Eukaryota; p__Apusozoa; c__Ancyromonadidae; o__Ancyromonas; f__Ancyromonas_howeae_None7122	0	0	0	0	0	0	0	0	1	0	0	0	0	0
Root; k__Eukaryota; p__Apusozoa; c__Ancyromonadidae; o__Ancyromonas; f__Ancyromonas_howeae_None7422	0	0	0	1	1	0	0	0	2	0	0	1	0	3
Root; k__Eukaryota; p__Apusozoa; c__Ancyromonadidae; o__Ancyromonas; f__Ancyromonas_howeae_None7862	0	0	0	0	0	0	0	1	0	0	0	0	0	0
Root; k__Eukaryota; p__Apusozoa; c__Ancyromonadidae; o__Ancyromonas; f__Ancyromonas_howeae_None9975	0	0	0	0	0	0	1	1	0	0	0	0	0	0
Root; k__Eukaryota; p__Apusozoa; c__Apusomonadidae; o__Amastigomonas; f__Amastigomonas_mutabilis_None7212	0	0	0	0	0	0	0	0	0	0	0	0	0	12
Root; k__Eukaryota; p__Centroheliozoa; c__Acanthocystidae; o__Choanocystis; f__Choanocystis_sp._oxford_106456	0	0	0	0	0	0	0	0	0	0	0	0	0	8
Root; k__Eukaryota; p__Centroheliozoa; c__Acanthocystidae; o__Choanocystis; f__Choanocystis_sp._oxford_None1469	1	0	0	0	0	0	0	3	2	0	0	0	0	0
Root; k__Eukaryota; p__Centroheliozoa; c__Acanthocystidae; o__Choanocystis; f__Choanocystis_sp._oxford_None2666	0	0	0	0	0	0	0	2	0	0	0	0	0	0
Root; k__Eukaryota; p__Centroheliozoa; c__Acanthocystidae; o__Choanocystis; f__Choanocystis_sp._oxford_None3016	0	0	0	0	1	0	0	1	0	0	0	0	0	0
Root; k__Eukaryota; p__Centroheliozoa; c__Acanthocystidae; o__Choanocystis; f__Choanocystis_sp._oxford_None764	0	0	0	0	0	0	0	0	0	0	0	0	2	0
Root; k__Eukaryota; p__Centroheliozoa; c__Acanthocystidae; o__Choanocystis; f__Choanocystis_sp._oxford_None9524	0	0	0	0	0	1	0	0	0	0	0	0	0	0
Root; k__Eukaryota; p__Centroheliozoa; c__Environmental_samples; o__Uncultured_centroheliozoan; f__Uncultured_centroheliozoan_None2866	0	0	0	0	0	0	0	0	0	0	1	0	0	0
Root; k__Eukaryota; p__Centroheliozoa; c__Environmental_samples; o__Uncultured_centroheliozoan; f__Uncultured_centroheliozoan_None8446	0	0	1	5	2	4	1	4	0	5	1	3	2	0
Root; k__Eukaryota; p__Centroheliozoa; c__Heterophryidae; o__Heterophrys; f__Heterophrys_sp._oxford1_76066	0	0	0	0	0	0	0	0	0	0	0	0	1	0
Root; k__Eukaryota; p__Centroheliozoa; c__Heterophryidae; o__Sphaerastrum; f__Sphaerastrum_fockii_79086	0	0	0	2	2	0	5	3	4	6	29	7	0	11
Root; k__Eukaryota; p__Centroheliozoa; c__Heterophryidae; o__Sphaerastrum; f__Sphaerastrum_fockii_None10439	0	0	0	0	0	0	0	0	0	1	0	0	0	0
Root; k__Eukaryota; p__Centroheliozoa; c__Heterophryidae; o__Sphaerastrum; f__Sphaerastrum_fockii_None10571	0	0	0	0	0	0	0	0	0	5	0	0	0	1
Root; k__Eukaryota; p__Centroheliozoa; c__Heterophryidae; o__Sphaerastrum; f__Sphaerastrum_fockii_None11012	0	0	0	0	0	0	0	0	0	1	0	0	0	0
Root; k__Eukaryota; p__Centroheliozoa; c__Heterophryidae; o__Sphaerastrum; f__Sphaerastrum_fockii_None11333	0	0	0	0	0	0	0	0	0	0	0	3	0	0
Root; k__Eukaryota; p__Centroheliozoa; c__Heterophryidae; o__Sphaerastrum; f__Sphaerastrum_fockii_None11378	0	0	0	0	0	0	0	0	0	2	0	34	0	1
Root; k__Eukaryota; p__Centroheliozoa; c__Heterophryidae; o__Sphaerastrum; f__Sphaerastrum_fockii_None1322	0	0	0	0	0	0	0	0	0	4	1	1	1	0
Root; k__Eukaryota; p__Centroheliozoa; c__Heterophryidae; o__Sphaerastrum; f__Sphaerastrum_fockii_None2163	0	0	0	0	0	0	0	0	0	5	0	2	0	0
Root; k__Eukaryota; p__Centroheliozoa; c__Heterophryidae; o__Sphaerastrum; f__Sphaerastrum_fockii_None4307	0	0	0	0	0	0	0	0	0	3	0	4	0	0
Root; k__Eukaryota; p__Centroheliozoa; c__Heterophryidae; o__Sphaerastrum; f__Sphaerastrum_fockii_None5034	0	0	0	0	1	0	0	0	0	10	6	2	0	0
Root; k__Eukaryota; p__Centroheliozoa; c__Heterophryidae; o__Sphaerastrum; f__Sphaerastrum_fockii_None5435	0	0	0	0	0	0	0	0	0	1	0	0	0	0
Root; k__Eukaryota; p__Centroheliozoa; c__Heterophryidae; o__Sphaerastrum; f__Sphaerastrum_fockii_None5567	0	0	0	0	0	0	0	0	0	8	2	0	0	0
Root; k__Eukaryota; p__Centroheliozoa; c__Heterophryidae; o__Sphaerastrum; f__Sphaerastrum_fockii_None5803	0	0	0	0	0	0	1	1	1	1	0	1	0	0
Root; k__Eukaryota; p__Centroheliozoa; c__Heterophryidae; o__Sphaerastrum; f__Sphaerastrum_fockii_None600	0	0	0	0	0	0	1	0	1	14	4	2	0	2
Root; k__Eukaryota; p__Centroheliozoa; c__Heterophryidae; o__Sphaerastrum; f__Sphaerastrum_fockii_None6553	0	0	0	0	0	0	0	0	0	4	5	11	0	1
Root; k__Eukaryota; p__Centroheliozoa; c__Heterophryidae; o__Sphaerastrum; f__Sphaerastrum_fockii_None6916	0	0	0	0	0	0	0	0	0	0	0	1	0	0
Root; k__Eukaryota; p__Centroheliozoa; c__Heterophryidae; o__Sphaerastrum; f__Sphaerastrum_fockii_None7090	0	0	0	0	0	0	0	0	0	0	0	0	0	3
Root; k__Eukaryota; p__Centroheliozoa; c__Heterophryidae; o__Sphaerastrum; f__Sphaerastrum_fockii_None7807	0	0	0	0	0	0	0	0	0	2	3	0	0	0
Root; k__Eukaryota; p__Centroheliozoa; c__Heterophryidae; o__Sphaerastrum; f__Sphaerastrum_fockii_None797	0	0	0	0	0	0	0	0	0	3	0	0	0	0
Root; k__Eukaryota; p__Centroheliozoa; c__Heterophryidae; o__Sphaerastrum; f__Sphaerastrum_fockii_None8189	0	0	0	0	0	0	0	0	0	5	4	3	0	1
Root; k__Eukaryota; p__Centroheliozoa; c__Heterophryidae; o__Sphaerastrum; f__Sphaerastrum_fockii_None9234	0	0	0	0	0	0	0	0	0	2	0	0	0	0
Root; k__Eukaryota; p__Centroheliozoa; c__Heterophryidae; o__Sphaerastrum; f__Sphaerastrum_fockii_None9516	0	0	0	0	0	0	0	0	0	0	2	0	0	0
Root; k__Eukaryota; p__Centroheliozoa; c__Heterophryidae; o__Sphaerastrum; f__Sphaerastrum_fockii_None961	0	0	0	0	0	0	0	0	0	4	2	0	0	0
Root; k__Eukaryota; p__Centroheliozoa; c__Heterophryidae_62127	0	0	0	0	0	0	0	0	2	0	0	1	0	0
Root; k__Eukaryota; p__Centroheliozoa; c__Heterophryidae_66263	0	0	0	1	0	0	0	0	0	78	16	1	0	4
Root; k__Eukaryota; p__Centroheliozoa; c__Heterophryidae_None10414	0	0	0	0	0	0	0	1	0	0	0	0	0	1
Root; k__Eukaryota; p__Centroheliozoa; c__Heterophryidae_None1278	0	0	0	0	0	0	0	0	0	1	0	0	0	3
Root; k__Eukaryota; p__Centroheliozoa; c__Heterophryidae_None1402	0	0	0	0	0	0	0	0	0	0	0	0	0	1
Root; k__Eukaryota; p__Centroheliozoa; c__Heterophryidae_None1908	0	0	0	0	0	0	0	0	0	0	2	0	0	0
Root; k__Eukaryota; p__Centroheliozoa; c__Heterophryidae_None250	0	0	0	0	0	0	0	0	0	0	1	0	0	0
Root; k__Eukaryota; p__Centroheliozoa; c__Heterophryidae_None2793	0	0	1	0	0	0	0	0	0	0	0	0	0	0
Root; k__Eukaryota; p__Centroheliozoa; c__Heterophryidae_None3302	0	1	0	1	0	0	0	0	0	0	0	0	0	2
Root; k__Eukaryota; p__Centroheliozoa; c__Heterophryidae_None4925	0	0	0	0	0	0	0	0	0	0	1	0	0	0
Root; k__Eukaryota; p__Centroheliozoa; c__Heterophryidae_None4946	0	0	0	0	0	0	0	0	0	2	0	0	0	0
Root; k__Eukaryota; p__Centroheliozoa; c__Heterophryidae_None5194	0	0	0	0	0	0	0	0	0	1	0	0	0	0
Root; k__Eukaryota; p__Centroheliozoa; c__Heterophryidae_None8167	0	0	0	0	0	0	0	0	0	1	0	0	0	0
Root; k__Eukaryota; p__Centroheliozoa; c__Heterophryidae_None8755	0	0	0	0	0	0	0	0	0	0	0	0	0	2
Root; k__Eukaryota; p__Centroheliozoa_110031	0	0	0	0	1	0	0	0	1	0	0	1	0	0
Root; k__Eukaryota; p__Centroheliozoa_67239	0	0	0	0	0	0	0	0	0	0	0	0	0	2
Root; k__Eukaryota; p__Centroheliozoa_None10048	0	0	0	0	0	0	0	0	0	2	0	1	0	0
Root; k__Eukaryota; p__Centroheliozoa_None10060	0	0	0	0	0	0	0	0	0	2	0	0	0	0
Root; k__Eukaryota; p__Centroheliozoa_None10132	0	0	0	0	0	0	0	0	0	1	0	0	0	1
[truncated: 7,356 more rows]
